# Supplementary material
Source: publisher figshare collection journal article supplement (https://tandf.figshare.com/articles/dataset/_/1568579)
Supplement: Supplementary file 1 [file 2]

## Supplementary material 1.

## Agricultural data of major crops in 13 selected European countries

**Source:** data for 2011 from Eurostat (<http://epp.eurostat.ec.europa.eu>), FAO STAT (<http://faostat3.fao.org/home/index.html>) and national statistical institutes.

**Abbreviations:** Belgium (BE), Bulgaria (BG), the Czech Republic (CZ), France (FR), Germany (DE), Hungary (HU), Italy (IT), Portugal (PT), Romania (RO), Spain (ES), Sweden (SE), Turkey (TR), and the United Kingdom (UK).

**Panel 1. Areas of major crops in % in the 13 selected European countries.**

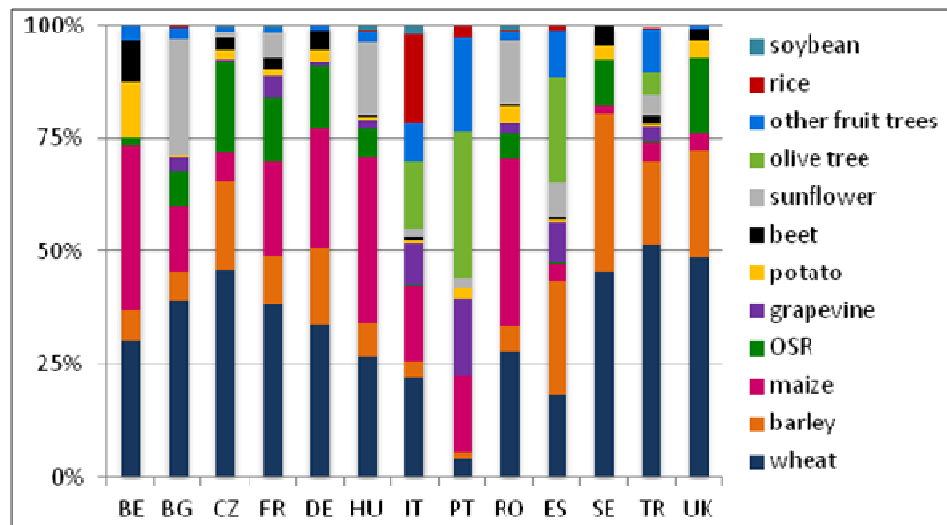

**Panel 2. Table of major crop areas in the 13 selected European countries.**

| Countries                                     | BE      | BG        | CZ      | FR        | DE        | HU        | IT        | PT      | RO        | ES        | SE      | TR        | UK        |
|-----------------------------------------------|---------|-----------|---------|-----------|-----------|-----------|-----------|---------|-----------|-----------|---------|-----------|-----------|
| <b>Agricultural area<sup>1</sup> (in MHa)</b> | 1,34    | 5,087     | 4,229   | 28,852    | 16,521    | 5,337     | 12,4      | 3,59    | 12,6      | 27,012    | 2,617   | 38,226    | 17,172    |
| <b>Crop area (Ha)</b>                         |         |           |         |           |           |           |           |         |           |           |         |           |           |
| Wheat <sup>2</sup>                            | 203 200 | 1 137 640 | 863 100 | 5 491 197 | 3 248 200 | 977 844   | 1 726 030 | 42 894  | 1 947 000 | 1 992 700 | 420 619 | 8 096 000 | 1 969 000 |
| Barley                                        | 44 139  | 178 993   | 372 800 | 1 544 665 | 1 598 100 | 261 254   | 269 675   | 16 627  | 419 500   | 2 700 700 | 323 317 | 2 868 830 | 970 000   |
| Maize                                         | 245 500 | 414 400   | 121 000 | 3 014 591 | 2 516 700 | 1 230 253 | 1 292 300 | 181 500 | 2 589 700 | 429 700   | 15 600  | 700 000   | 150 000   |
| OSR                                           | 12 016  | 231 309   | 373 400 | 1 984 212 | 1 328 600 | 233 903   | 18 834    | 0       | 392 700   | 31 300    | 97 606  | 26 830    | 681 000   |
| Grapevine                                     | 0       | 78 468    | 17 198  | 764 124   | 97 400    | 81 001    | 717 600   | 179 474 | 176 600   | 960 190   | 0       | 472 545   | 1 000     |
| Potato                                        | 82 341  | 16 200    | 33 600  | 158 643   | 258 700   | 20 966    | 62 091    | 26 500  | 242 600   | 79 900    | 27 588  | 142 985   | 146 000   |
| Beet                                          | 62 199  | 0         | 50 200  | 393 134   | 398 100   | 15 154    | 62 200    | 321     | 18 800    | 44 900    | 39 377  | 297 265   | 113 000   |
| Sunflower                                     | 0       | 747 100   | 28 600  | 767 463   | 26 800    | 579 548   | 118 100   | 22 418  | 995 000   | 862 900   | 0       | 655 700   | 0         |
| Olive tree                                    | 0       | 0         | 0       | 16 945    | 0         | 0         | 1 162 400 | 345 683 | 0         | 2 503 675 | 0       | 793 793   | 0         |
| Other fruit trees (orchards)                  | 21 671  | 71 642    | 16 400  | 170 942   | 80 135    | 91 101    | 677 134   | 220 988 | 155 600   | 1 118 680 | 0       | 1 530 000 | 24 600    |
| Rice                                          | 0       | 11 970    | 0       | 23 177    | 0         | 2 710     | 1 490 200 | 29 100  | 12 700    | 122 184   | 0       | 99 400    | 0         |
| Soybean                                       | 0       | 600       | 7 600   | 41 571    | 1 000     | 41 009    | 165 965   | 0       | 72 100    | 766       | 0       | 26 421    | 0         |
| <b>Forestry (Mha)</b>                         | 0,649   | 4,074     | 2,66    | 16,61     | 10,766    | 1,922     | 9,45      | 3,478   | 6,362     | 18,954    | 28,3    | 21,53     | 2,88      |

<sup>1</sup> crops and pastures

<sup>2</sup> bread wheat and durum wheat

## Supplementary Material 2.

**Table S1. Sources for agricultural data and research programs by country**

| Country | Institutes                                                                                                                                                                                                                                                                                                                                                                                                                                                                                                                                                                                                                                                                                                                                                                                                                                                                      |
|---------|---------------------------------------------------------------------------------------------------------------------------------------------------------------------------------------------------------------------------------------------------------------------------------------------------------------------------------------------------------------------------------------------------------------------------------------------------------------------------------------------------------------------------------------------------------------------------------------------------------------------------------------------------------------------------------------------------------------------------------------------------------------------------------------------------------------------------------------------------------------------------------|
| BE      | Sources for agricultural data: Agricultural research scientists and farming organizations, VIB, Statistics Belgium ( <a href="http://statbel.fgov.be/fr/statistiques/chiffres/">http://statbel.fgov.be/fr/statistiques/chiffres/</a> ), and agronomy/plant breeding professors from Ghent University (UGent). Information on research programs was compiled from internal expertise from the research policy department at VIB.                                                                                                                                                                                                                                                                                                                                                                                                                                                 |
| BG      | Information on agricultural data was compiled from (1) Faculty of Agronomy, Agricultural University of Plovdiv; (2) farmer's organizations - BAAP and AGP; and (3) official data from Ministry of Agriculture were used as sources to identify the major challenges in the country. Survey of the research programs at the Agricultural Academy, Bulgarian Academy of Science and the Agricultural University of Plovdiv was undertaken to complement the data on challenges.                                                                                                                                                                                                                                                                                                                                                                                                   |
| CZ      | Sources for agricultural data: specialized web sites of Ministry of Agriculture ( <a href="http://eagri.cz/public/web/en/mze/ministry/">http://eagri.cz/public/web/en/mze/ministry/</a> ), Ministry of Environment ( <a href="http://www.mzp.cz/en/">http://www.mzp.cz/en/</a> ), State Phytosanitary Organisation now Central Institute for Supervising and Testing in Agriculture ( <a href="http://eagri.cz/public/web/en/ukzuz/portal/">http://eagri.cz/public/web/en/ukzuz/portal/</a> ), and articles in specialized agricultural journals. Research programs: the Research and Development and Innovation System of the Czech Republic ( <a href="http://www.isvav.cz/index.jsp">http://www.isvav.cz/index.jsp</a> )                                                                                                                                                     |
| DE      | Sources for agricultural data: representative farmers, offices of farmer organizations, and web site of the German Farmers' Association (DBV). Information on research programs was compiled by Prof. Inge Broer, University of Rostock and Prof. Hans-Jörg Jacobsen, Leibniz Universität Hannover.                                                                                                                                                                                                                                                                                                                                                                                                                                                                                                                                                                             |
| ES      | Fundacion Antama, ASAJA, Anuario Estadístico 2011 (Ministerio de Agricultura, Alimentación y Medio Ambiente; <a href="http://www.magrama.gob.es/en/">http://www.magrama.gob.es/en/</a> ), ANOVE (Asociación Nacional de Obtentores Vegetales), and CRAG (Centre de Recerca en AgriGenòmica)                                                                                                                                                                                                                                                                                                                                                                                                                                                                                                                                                                                     |
| FR      | Sources for agricultural data: Arvalis - Institut du Végétal; CETIOM (Centre Technique Interprofessionnel des Oléagineux Métropolitains); ITB (Institut Technique de la Betterave); Ministère de l'Agriculture– Agreste ( <a href="http://www.agreste.agriculture.gouv.fr/">http://www.agreste.agriculture.gouv.fr/</a> ); SupAgro-Montpellier. Research programs: INRA (Institut National de la Recherche Agronomique): Bordeaux /Clermont-Ferrand /Colmar /Rennes /Moulon /Versailles /Montpellier /Orléans /Toulouse; INRA-CNRS Castanet Tolosan/ Grenoble, Private companies (Biogemma SA, Florimond Desprez Veuve & Fils, Secobra, Syngenta and Limagrain). The Group of Interest "Plant Biotechnologies": <a href="http://www.gisbiotechnologiesvertes.com/">http://www.gisbiotechnologiesvertes.com/</a>                                                                 |
| HU      | Various statistical databases of the Hungarian Central Statistical Office ( <a href="http://www.ksh.hu/?lang=en">http://www.ksh.hu/?lang=en</a> ; Last update in 2013). GMO trials and relevant research projects were identified from the Hungarian GMO Database ( <a href="http://biosafety.abc.hu/databases.php">http://biosafety.abc.hu/databases.php</a> ) and a public database of the Hungarian Scientific Research Fund ( <a href="http://nyilvanos.otka-palyazat.hu/">http://nyilvanos.otka-palyazat.hu/</a> ), respectively. For further details we contacted researchers involved in the majority of these projects (see Acknowledgements), and monitored five major farmer weekly and monthly journals (Agrofórum, Agro Napló, Haszon Agrár, Magyar Mezőgazdaság and MezőHír) written by experts and/or farmers for farmers. Also, university study books and a few |

---

local farmers were consulted.

- IT Sources for agricultural data: National Institute of Statistics (ISTAT) [www.istat.it/](http://www.istat.it/), National Institute for Agricultural Economy (INEA) <http://dspace.inea.it/handle/inea/1008> and Ministry of Agricultural, Food and Forestry Policies (MIPAAF).  
Agronomists and researchers mainly from the public sector: from C.R.A. - Consiglio per la Ricerca e la Sperimentazione in Agricoltura ([www.entecra.it/](http://www.entecra.it/)), particularly from Centro di ricerca per la genomica vegetale (Fiorenzuola d'Arda PC) (CRA-GPG), from the University of Milan, of Turin, of Modena and Reggio Emilia, Parco Tecnologico Padano (Lodi), Mach Foundation (Trento), but also people from the private sector (Dekalb, Pioneer-Dupont), and 400 members of the Italian Society for Agricultural Genetics (SIGA). For some details on pesticide treatment on maize: farmers from the province of Crema and the farmer's union Futuragra.
- PT Sources for agricultural data: Agriculture Statisticas 2012, Statistics Portugal Edition 2013, and official manuals for Integrated Pest Management of the Ministry of Agriculture, then some researchers for confirmation.  
Data on research activities were collected by personal communications with researchers in relevant institutions.
- RO Sources for agricultural data: Romanian farmer associations (especially LAPAR). [www.madr.ro](http://www.madr.ro) (Ministry of Agriculture and Rural Development); [www.asas.ro](http://www.asas.ro) (Academy for Agricultural and Forestry Sciences); [www.research.ro](http://www.research.ro) (Ministry of Education and Research); [www.anpm.ro](http://www.anpm.ro) (National Agency for Environment Protection); [www.research.ro](http://www.research.ro) (Plum Virus Research Program BRANCUSI)
- SE Sources for agricultural data: Swedish Board of Agriculture databases (<http://fou.sjv.se/skade/mobil/default.lasso>; <http://www.jordbruksverket.se/swedishboardofagriculture.4.6621c2fb1231eb917e680002462.html>), the Swedish University of Agricultural Sciences collected additional information.  
Data on research activities were collected by personal communications with relevant institutions.
- TR The TR agricultural data was compiled in a previous work (Gözen, A., K. Abak, H. Kasnakoglu, S. Cetiner and A. Güzel. 1995. Priorities for Plant Biotechnology Research in Turkey. Technology Development Fund of Turkey. No2. Ankara) and updated by interviews of farmers representatives and agronomists. The sources of agricultural data were already provided at Turkish Statistical Institute (TurkStat) (<http://www.turkstat.gov.tr/UstMenu.do?metod=temelist>).  
Information on research programs was obtained from TUBITAK (Scientific and Technical Research Council of Turkey) National Research Database (<http://uvt.ulakbim.gov.tr/proje/>) and through personal communications.
- UK Agricultural data was compiled by the National Farmers Union and the John Innes Centre, using data obtained from the following websites. Crop Harvest information was obtained using statistics from the UK's Department for Environment and Rural Affairs <http://www.defra.gov.uk/statistics/foodfarm/>  
Information on key challenges was compiled with the help of the following divisions of the Agricultural and Horticultural Development Board (AHDB): AHDB-HGCA for cereals and oilseed; <http://www.hgca.com>; and AHDB-Potato Council for potatoes; <http://www.potato.org.uk/>; and the British Beet Research Organisation BBRO for sugar beet; <http://www.bbrow.co.uk/>.  
Information on research programmes was compiled from feedback to an email questionnaire sent out to targeted research institutes and universities as part of a pilot study – it therefore provides examples of current research but does not represents an exhaustive summary of UK research programmes.
-

**Table S2. Answers to 9 key questions**

**Disclaimer.** On the basis of the sources shown in Table S1, data and information presented below are gathered in order to provide a general overview rather than a strict analysis and a categorization of participating countries according to their attitudes on the use of transgenesis in agriculture. For an in-depth analysis more and uniformly structured data homogeneously available in all participant countries would be required. The data presented in response to some of the 9 key questions are limited in size due to the varying level of replies received in response to the questionnaire in the different participating countries. This limitation must be taken into account in any summaries of the data.

**1. Give a brief summary of the agronomical (5 main crops, area in ha and challenges, as in matrix)/economical (in relation to agriculture and research) situation in your country.**

|                | General                                                                                                                                                        | 5 main crops (thousands of hectares) |           |        |            |                       | Challenges                                                                                                                                                                             | Comments                                                                               |
|----------------|----------------------------------------------------------------------------------------------------------------------------------------------------------------|--------------------------------------|-----------|--------|------------|-----------------------|----------------------------------------------------------------------------------------------------------------------------------------------------------------------------------------|----------------------------------------------------------------------------------------|
| Belgium        | Arable crop farming.<br>Dairy and meat farming.<br>Orchards (mainly apples & pears).<br>Vegetable cultivation.<br>Cultivation of ornamentals.                  | Maize (grain & silage)               | Wheat     | Potato | Sugar beet | Barley                | <b>1.</b> Diseases (especially fungal diseases, ex potato, apple, pear, maize and wheat cultivation)<br><b>2.</b> Costs of growing crops combined with the volatility of market prices | Cost savings requiring breakthroughs in disease resistance.                            |
|                |                                                                                                                                                                | 245.5                                | 203.2     | 82.3   | 62.2       | 44.1                  |                                                                                                                                                                                        |                                                                                        |
| Bulgaria       | Crops number is decreasing as the average farm size increases in the last 5-6 years.                                                                           | Wheat                                | Sunflower | Maize  | OSR        | Barley                | <b>1.</b> Water availability (main crops are rain-fed grown)<br><b>2.</b> Biotic constraints: pests, diseases, and competition from weeds                                              |                                                                                        |
|                |                                                                                                                                                                | 1 137                                | 747.1     | 414.4  | 231.3      | 178.9                 |                                                                                                                                                                                        |                                                                                        |
| Czech Republic | 53.7% of Czech area is agricultural land, with slow decrease. The total production of key crops depends on weather conditions.<br><br>Acreage of feeding crops | Wheat                                | Barley    | Rape   | Maize      | Industrial sugar beet | <b>1.</b> Weed (normally use pre-emergence and/or post-emergence dose of herbicide)<br><b>2.</b> Diseases: cereals' grass powdery mildew, leaf blotch, common                          | Seed treatment and relatively resistant varieties of some crops (traditional breeding) |
|                |                                                                                                                                                                | 863.1                                | 372.8     | 363.4  | 121        | 50.2                  |                                                                                                                                                                                        |                                                                                        |

|         |                                                                                                                                  |       |       |           |             |            |                                                                                                                                                                                                                                                                                                                                                                                              |                                                                                            |
|---------|----------------------------------------------------------------------------------------------------------------------------------|-------|-------|-----------|-------------|------------|----------------------------------------------------------------------------------------------------------------------------------------------------------------------------------------------------------------------------------------------------------------------------------------------------------------------------------------------------------------------------------------------|--------------------------------------------------------------------------------------------|
|         | decreases due to decrease of number of livestock. Usage of crop for production of bioethanol and biogas increases (maize, rape). |       |       |           |             |            | blight wheat, fusarioses and common smut<br><br><b>3. Pest:</b> Cereal leaf beetle ( <i>Oulema gallaeciana</i> )                                                                                                                                                                                                                                                                             | techniques).                                                                               |
| France  |                                                                                                                                  | Wheat | Maize | Barley    | OSR         | Grapevine  | <b>1.</b> Stagnating yields due to increasing water scarcity<br><b>2.</b> Insect pests (particularly in OSR and maize)<br><b>3.</b> Fungal diseases (powdery mildew in grapevines or fusarium ear blight in wheat)                                                                                                                                                                           | Selecting high yielding varieties and drought resistance (wheat), NUE (maize) is required. |
|         |                                                                                                                                  | 5 491 | 3 014 | 1 544     | 1 984       | 764.1      |                                                                                                                                                                                                                                                                                                                                                                                              |                                                                                            |
| Germany |                                                                                                                                  | Wheat | Maize | Barley    | Winter rape | Sugar beet | <b>1.</b> Wheat: Fungal and viral diseases; flies and midges, aphids, nematodes<br><b>2.</b> Maize: European corn borer, Western corn rootworm<br><b>3.</b> Barley: Fungal Disease (Fusarium head blight and root rot) and Viral Disease<br><b>4.</b> Winter rape: Fungal diseases; curculionid and chrysomelid beetles, flies<br><b>5.</b> Sugar beet: Fungal diseases; nematodes wireworms |                                                                                            |
|         |                                                                                                                                  | 3 248 | 2 516 | 1 598     | 1 328       | 398.1      |                                                                                                                                                                                                                                                                                                                                                                                              |                                                                                            |
| Hungary | Five million ha of arable land                                                                                                   | Maize | Wheat | Sunflower | Barley      | OSR        | <b>1.</b> A major emerging                                                                                                                                                                                                                                                                                                                                                                   |                                                                                            |

|          |                                                                                                                                                                                                                                                                                                                                                                                                  |             |           |           |                |           |                                                                                                                                                                                                                 |  |
|----------|--------------------------------------------------------------------------------------------------------------------------------------------------------------------------------------------------------------------------------------------------------------------------------------------------------------------------------------------------------------------------------------------------|-------------|-----------|-----------|----------------|-----------|-----------------------------------------------------------------------------------------------------------------------------------------------------------------------------------------------------------------|--|
|          | (>50% of total land) are cultivated.<br>Agriculture is still a major economic sector. Farm structure is currently in a transition phase in favour of small-scale farmers.                                                                                                                                                                                                                        | 1 325       | 977.8     | 579.5     | 261.2          | 233.9     | constraint for plant production is drought, to which maize and wheat are the most vulnerable<br><b>2.</b> Insect pests in maize<br>Fungal infections in wheat                                                   |  |
| Italy    | “Genetic spread” phenomenon concerning maize breeding between Italy and other advanced countries. This yield gap translates into extensive losses in economic terms. The spread is likely due to the impossibility to access the best breeding material available at the international level because this is essentially all transgenics (with insect resistance or herbicide tolerance traits). | Wheat       | Rice      | Maize     | Olive trees    | Grapevine | <b>1.</b> Maize insect parasites (European corn borer and Western corn rootworm)<br><b>2.</b> Drought and cold for wheat (both durum and bread wheat)<br><b>3.</b> Fungal diseases in apple, rice and grapevine |  |
|          |                                                                                                                                                                                                                                                                                                                                                                                                  | 1 726       | 1 490     | 1 292     | 1 162          | 717.6     |                                                                                                                                                                                                                 |  |
| Portugal |                                                                                                                                                                                                                                                                                                                                                                                                  | Olive tree  | Grapevine | Maize     | Winter Cereals | Forestry  | Species used for feed ( <i>Medicago</i> , <i>Lathyrus</i> , alfalfa, etc.)                                                                                                                                      |  |
|          |                                                                                                                                                                                                                                                                                                                                                                                                  | 345.7       | 179.4     | 100       | 150            | 3 400     |                                                                                                                                                                                                                 |  |
| Romania  |                                                                                                                                                                                                                                                                                                                                                                                                  | Grain maize | Wheat     | Sunflower | Barley         | Rapeseed  | Economic challenges: shortage of financial resources                                                                                                                                                            |  |

|        |                                                                                                                                                                                                                                                                                       |        |             |        |           |           |                                                                                                                                                                                                                                                                                                             |  |
|--------|---------------------------------------------------------------------------------------------------------------------------------------------------------------------------------------------------------------------------------------------------------------------------------------|--------|-------------|--------|-----------|-----------|-------------------------------------------------------------------------------------------------------------------------------------------------------------------------------------------------------------------------------------------------------------------------------------------------------------|--|
|        |                                                                                                                                                                                                                                                                                       | 2 588  | 1 947       | 995    | 419.5     | 392.7     | <b>1.</b> Wheat: resistance to <i>Fusarium</i> , <i>Puccinia</i> and <i>Eurigaster</i><br><b>2.</b> Grain maize: main diseases ( <i>Helminthosporium</i> , <i>Ustilago</i> ) and pest ( <i>Ostrinia nubilalis</i> )<br><b>3.</b> Sunflower: testing at farm level for resistance to <i>Orobanche cumana</i> |  |
| Spain  | Agriculture is important to the national economy; 20.6 million ha, about 40% are suitable for cultivation. Soil is generally of poor quality. Roughness of the terrain has been an obstacle to agricultural mechanization. Land erosion is a serious problem in parts of the country. | Barley | Olive Trees | Wheat  | Grapevine | Maize     | <b>1.</b> Insect pests ( <i>e.g.</i> , ground beetles in barley, fruit flies in olive production, and European corn borer in maize)<br><b>2.</b> Fungal diseases ( <i>e.g.</i> , smuts in barley and wheat, olive leaf spot, mildew in grapevines)<br><b>3.</b> Viruses                                     |  |
|        |                                                                                                                                                                                                                                                                                       | 2 700  | 2 503       | 1 992  | 960.2     | 429.7     |                                                                                                                                                                                                                                                                                                             |  |
| Turkey | The 7 <sup>th</sup> largest agricultural producer in the world with 21.3 million ha agricultural land and different agro-ecological conditions.                                                                                                                                       | Wheat  | Barley      | Tomato | Maize     | Sunflower | <b>1.</b> Wheat and barley production: drought, pests (Hessian fly, Sunn pest) and diseases (rust and mildew)<br><b>2.</b> Sunflower: downy mildew and sunflower broomrape<br><b>3.</b> Maize: pests (European corn borer,                                                                                  |  |



|                |                                                                                                                                                             |       |        |       |        |            |                                                                                                                                                                                                                                         |  |
|----------------|-------------------------------------------------------------------------------------------------------------------------------------------------------------|-------|--------|-------|--------|------------|-----------------------------------------------------------------------------------------------------------------------------------------------------------------------------------------------------------------------------------------|--|
|                |                                                                                                                                                             | 8 096 | 2 868  | 1 100 | 700    | 655        | corn root worm and stem borer)                                                                                                                                                                                                          |  |
| Sweden         | Swedish forests dominated by Norway spruce and Scots pine, forests cover over 28 000 kHa. 100 mil ton harvested. Climate adaptation, root rot, pine weevil. | Wheat | Barley | OSR   | Potato | Forests    | <b>1.</b> Yield, disease and insects for wheat, barley<br><b>2.</b> Yield, pollen beetle for rapeseed<br><i>Phytophthora</i> for potatoes                                                                                               |  |
|                |                                                                                                                                                             | 420.6 | 323.3  | 97.6  | 27.6   | 28 300     |                                                                                                                                                                                                                                         |  |
| United Kingdom |                                                                                                                                                             | Wheat | Barley | OSR   | Potato | Sugar beet | <b>1.</b> Fungal diseases such as septoria in wheat and net blotch in barley<br><b>2.</b> Phoma stem canker is the most economically important oilseed rape disease<br><b>3.</b> Potato late blight control requires several fungicides |  |
|                |                                                                                                                                                             | 1 969 | 970    | 681   | 146    | 113        |                                                                                                                                                                                                                                         |  |

2. Is your country developing specific breeding techniques such as Agro-infiltration, Cisgenesis, Intragenesis, MAS (Marker-Assisted Selection: SNP (Single Nucleotide Polymorphism) and QTL (Quantitative Trait Loci)), ODM (Oligonucleotide Directed Mutagenesis), RNA-dependent DNA methylation (RdDM), Reverse Breeding, or ZFN (Zinc Finger Nuclease Technology) and other nucleases (meganuclease, TALEN (Transcription Activator-Like Effector Nuclease) and CRISPR (Clustered Regularly Interspaced Short Palindromic Repeats))?

|                   | Agro-infiltration | Cisgenesis<br>Intragenesis | MAS<br>(SNP and QTL)                                                                                                                                                                                                                                                                                                                                                                                                                                    | ODM                                                                    | RdDM | Reverse<br>Breeding | ZFNs and other<br>nucleases | Comments                                                                                                                                                                                                                                                                                                                                                          |
|-------------------|-------------------|----------------------------|---------------------------------------------------------------------------------------------------------------------------------------------------------------------------------------------------------------------------------------------------------------------------------------------------------------------------------------------------------------------------------------------------------------------------------------------------------|------------------------------------------------------------------------|------|---------------------|-----------------------------|-------------------------------------------------------------------------------------------------------------------------------------------------------------------------------------------------------------------------------------------------------------------------------------------------------------------------------------------------------------------|
| Belgium           |                   | Cisgenesis                 |                                                                                                                                                                                                                                                                                                                                                                                                                                                         | New traits in<br>canola,<br>lettuce,<br>petunia,<br>tobacco,<br>tomato |      |                     |                             | Relevant alternatives<br>for generating genetic<br>variation.                                                                                                                                                                                                                                                                                                     |
| Bulgaria          |                   |                            | Cotton and sunflower.                                                                                                                                                                                                                                                                                                                                                                                                                                   |                                                                        |      |                     |                             | Transgenic research is<br>essentially banned.                                                                                                                                                                                                                                                                                                                     |
| Czech<br>Republic |                   |                            | <ol style="list-style-type: none"> <li>1. To improve coping of cereals (wheat and barley) with abiotic stress: Crop Res. Inst. Prague.</li> <li>2. To enhance resistance of garden pea to pea seed-borne mosaic virus, fusarium root rot (<i>Fusarium solani</i>), fusarium wilt (<i>Fusarium oxysporum</i>): Agritec Plant Research Ltd., Šumperk; SEMO, Smržice; Palacký Univ., Olomouc; Mendel Univ., Brno; Institute of Entomology, CAS.</li> </ol> |                                                                        |      |                     |                             | <ol style="list-style-type: none"> <li>1. Positional cloning is used for resistance of wheat to the powdery mildew <i>Blumeria graminis f. sp. tritici</i> and to septoria leaf blotch <i>Mycosphaerella graminicola</i>.</li> <li>2. Biotechnology is used for increasing the resistance of rape to blackleg disease (<i>Leptosphaeria maculans</i>).</li> </ol> |

|        |              |                          |                                                                                                                                                                       |                                                                                                                                                                                                                                                                                                                                                                                                                                                                                                                                                                                                                                                                                                                                                                                     |
|--------|--------------|--------------------------|-----------------------------------------------------------------------------------------------------------------------------------------------------------------------|-------------------------------------------------------------------------------------------------------------------------------------------------------------------------------------------------------------------------------------------------------------------------------------------------------------------------------------------------------------------------------------------------------------------------------------------------------------------------------------------------------------------------------------------------------------------------------------------------------------------------------------------------------------------------------------------------------------------------------------------------------------------------------------|
| France | SNP and QTL. | Not tested or developed. | Meganuclease, TALEN and CRISPR (and also transgenesis) tested on wheat, maize, rice, OSR, tomato, potato, apple, poplar, and <i>Brachypodium</i> ('Genius' programme) | <p>French breeding programs tend not to use transgenesis for political reasons. Meganuclease, CRISPR, and TALEN are developed in basic research mostly for proof of concept (<i>e.g.</i> biotic and abiotic stress): 'Genius' <i>Genome ENgineering Improvement for Useful plants of a Sustainable agriculture</i> is an ANR funded project gathering a consortium of 15 public &amp; private partners. Public partners : INRA, CIRAD Université Lyon 3; Private partners: Collectis, Biogemma, Germicopa, Pépinières et Roseraies G. Delbard, Vilmorin</p> <p>The traits targeted in case studies are yield, architecture and resistance to biotic and abiotic stress (Nitrogen Use Efficiency)</p> <p><a href="http://www.genius-project.fr">http://www.genius-project.fr</a></p> |
|--------|--------------|--------------------------|-----------------------------------------------------------------------------------------------------------------------------------------------------------------------|-------------------------------------------------------------------------------------------------------------------------------------------------------------------------------------------------------------------------------------------------------------------------------------------------------------------------------------------------------------------------------------------------------------------------------------------------------------------------------------------------------------------------------------------------------------------------------------------------------------------------------------------------------------------------------------------------------------------------------------------------------------------------------------|

|          |                                                                                                                               |                        |                                                                                                                                                 |
|----------|-------------------------------------------------------------------------------------------------------------------------------|------------------------|-------------------------------------------------------------------------------------------------------------------------------------------------|
| Germany  |                                                                                                                               |                        | These techniques are being developed, but there remains a gap in the translation of proven technologies, especially transgenesis into practice. |
| Hungary  | Wheat, grape and forestry.                                                                                                    | In experimental phase. |                                                                                                                                                 |
| Italy    | To improve some crops, especially cereals (durum wheat, bread wheat, barley and rice) and woody plants (grapevine and apple). |                        |                                                                                                                                                 |
| Portugal | SNP and QTL.                                                                                                                  | Yes.                   |                                                                                                                                                 |
| Romania  | Yes.                                                                                                                          |                        |                                                                                                                                                 |
| Spain    | SNPs and QTLs in tree major crops: prunus, strawberry and melon.                                                              |                        | ZFN is recent and expensive. It is cheaper to use the kit of direct mutagenesis (e.g. <i>Arabidopsis</i> plants).                               |
| Sweden   | Some breeding programs.                                                                                                       |                        |                                                                                                                                                 |

|        |                                                                                                                                                                                                                                                                                         |                                        |
|--------|-----------------------------------------------------------------------------------------------------------------------------------------------------------------------------------------------------------------------------------------------------------------------------------------|----------------------------------------|
| Turkey | <ol style="list-style-type: none"> <li>1. To improve bread and durum wheats (glutenin and gliadin alleles, high protein, Waxy, lipoxygenase, and <i>Puccinia</i> resistance).</li> <li>2. To improve the malt quality of brewing barley.</li> <li>3. Tomatoes and eggplants.</li> </ol> |                                        |
| UK     | Relies on transgenesis, TILLING, and techniques utilizing the latest advances in next-generation sequencing.                                                                                                                                                                            | Active in genome editing technologies. |

### 3. Is transgenesis in plants used in basic research and/or to create new varieties?

|                | Basic research                                     | Creation of new varieties                                                            | Institutions                                                                                                                                                                                                                                                                                                                      | Comments                                                                                                                                                            |
|----------------|----------------------------------------------------|--------------------------------------------------------------------------------------|-----------------------------------------------------------------------------------------------------------------------------------------------------------------------------------------------------------------------------------------------------------------------------------------------------------------------------------|---------------------------------------------------------------------------------------------------------------------------------------------------------------------|
| Belgium        | Yes                                                | Yes                                                                                  | Ghent (UGent, VIB, Bayer Cropscience CropDesign (part of BASF Plant Sciences) Devgen<br>Other universities and research institutes                                                                                                                                                                                                | Genetic modification is used to study plant related sciences, especially Bayer Cropscience and Crop Design. Crop Design has a strong focus on intragenesis.         |
| Bulgaria       | By three different groups.                         |                                                                                      |                                                                                                                                                                                                                                                                                                                                   | Few new genotypes are developed per year, but reaching the field trial stage is explicitly banned, not to speak about approaching variety registration.             |
| Czech Republic | Yes, see Kodrik et al. (2013) in Suppl. Material 5 | The research is mainly targeted on the enhancement of yield and tolerance to stress. | Crop Research Institute, Institute of Experimental Botany AS CR, Universities, Potato Research Institute, AGRA GROUP.                                                                                                                                                                                                             | Bureaucratic difficulties for scientists, majority of new traits only ever reach evaluation under glasshouse conditions, field trial or even practical application. |
| France         | Public research uses transgenesis                  | No                                                                                   |                                                                                                                                                                                                                                                                                                                                   | The private sector performs its field trials mainly in the USA to assess new GM varieties.                                                                          |
| Germany        | Yes                                                | Yes                                                                                  | Leibniz Universität Hannover is focusing on the development of transgenic legume prototypes (mainly pea and faba bean) conferring fungal, insect and drought tolerance resistance. These prototypes are designed to become introduced into breeding programs as the required traits are unavailable in the respective gene pools. | Transgenesis is used already by students (during undergraduate or graduate years, depending on the focus of their work and the university's curriculum).            |

|          |                                                                                                                                                                                                                             |                                                                                                                                                                                                                                                  |                                                                                                                                                                                                           |
|----------|-----------------------------------------------------------------------------------------------------------------------------------------------------------------------------------------------------------------------------|--------------------------------------------------------------------------------------------------------------------------------------------------------------------------------------------------------------------------------------------------|-----------------------------------------------------------------------------------------------------------------------------------------------------------------------------------------------------------|
| Hungary  | Yes: public institutes for generating prototypes.                                                                                                                                                                           | No                                                                                                                                                                                                                                               | Transgenic plants are used for proof-of-concept research only: see Balázs et al. (2011) Plain Facts About GMOs – Hungarian White Paper ( <a href="http://www.pannonbiotech.hu">www.pannonbiotech.hu</a> ) |
| Italy    | Yes                                                                                                                                                                                                                         | Yes.<br>This was done for fruit trees (apple, grapevine, kiwi, olive...) as well as annual crops (wheat, barley...).                                                                                                                             | None has any chance of reaching the field trial stage, not to mention commercial release, due to the present regulation and political climate.                                                            |
| Portugal | Yes                                                                                                                                                                                                                         | No                                                                                                                                                                                                                                               |                                                                                                                                                                                                           |
| Romania  | Yes                                                                                                                                                                                                                         | Yes                                                                                                                                                                                                                                              | Seven references in total.                                                                                                                                                                                |
| Spain    | Rice and specially <i>Arabidopsis thaliana</i> are used as models plant, transformed with new unknown genes and promoters to study their functions, and then the information can be extrapolated to other non model plants. | Transgenic plants of different species (orange trees in Valencia, grapevine in Galicia, vegetables crops and fruit trees in Catalonia etc.) have been obtained but until now only Bt maize is commercialized and cultivated in Spain since 1998. |                                                                                                                                                                                                           |
| Sweden   | A lot                                                                                                                                                                                                                       | Not yet                                                                                                                                                                                                                                          |                                                                                                                                                                                                           |
| Turkey   | Only in a few university laboratories                                                                                                                                                                                       |                                                                                                                                                                                                                                                  | Cultivation of transgenic plants is explicitly banned by the Biosafety Law there is no sense of wasting resources on transgenic research.                                                                 |

|                |     |     |                                                                                                                                                                                                                                                                                                                                                                                                                                                                                                          |
|----------------|-----|-----|----------------------------------------------------------------------------------------------------------------------------------------------------------------------------------------------------------------------------------------------------------------------------------------------------------------------------------------------------------------------------------------------------------------------------------------------------------------------------------------------------------|
| United Kingdom | Yes | Yes | <p>Transgenesis is used as a tool for the study of gene function. The information is then used in conventional breeding approaches.</p> <p>Transgenesis has the advantage that it allows the introduction or modification of genes that would be difficult or impossible by conventional approaches, <i>e.g.</i> enhanced nutritional quality leading to health benefits.</p> <p>However, the route to development of new varieties for commercial use is extremely costly and difficult at present.</p> |
|----------------|-----|-----|----------------------------------------------------------------------------------------------------------------------------------------------------------------------------------------------------------------------------------------------------------------------------------------------------------------------------------------------------------------------------------------------------------------------------------------------------------------------------------------------------------|

#### 4. What is the number of research projects using transgenesis in plants among the projects?

See Figure 2



## 5. How many field trials using GM crops are implemented?

\* 2013 data are presented here. Full data of field trials concerned with biotic stress challenges (2003-2013) are in Supplementary Material 7.

| Total field trials<br>using GM plants | 0                    | 1-5                                                                     | 10-28          |
|---------------------------------------|----------------------|-------------------------------------------------------------------------|----------------|
| <b>Maize</b>                          |                      | BE<br>CZ (4 joint)<br>HU (4 public)                                     | ES             |
| <b>Potatoes</b>                       |                      | BE (1/1)<br>DE<br>HU (1 public)<br>UK                                   |                |
| <b>Sugar beet</b>                     |                      | CZ (2 private)<br>DE<br>ES (3 private)                                  |                |
| <b>Poplar trees</b>                   |                      | FR (1 public,<br>stopped in July<br>2013)<br>BE (public)<br>SE (public) |                |
| <b>Others</b>                         | BG<br>IT<br>PT<br>TR | CZ (2/2, 1 joint)<br>UK                                                 | RO<br>SE (2/8) |

Brackets: private/public or joint participation

**6. How did the number of field trials of GM plants change over the last 10 years (discontinued, stable, declined, increased)?**

| Change of number of field trials of GM plants | Discontinued         | Declined                               | Stable | Increased |
|-----------------------------------------------|----------------------|----------------------------------------|--------|-----------|
| Countries                                     | BG<br>IT<br>PT<br>TR | BE<br>CZ<br>DE<br>FR<br>HU<br>RO<br>UK | SE     | ES        |

**7. Is plant breeding primarily developed by the public sector or by the private sector, or both in equal levels?**

| Sector                          | Countries                          |
|---------------------------------|------------------------------------|
| Primarily by public sector      | BG*<br>CZ<br>PT<br>RO              |
| Primarily by private sector     | BE*<br>DE                          |
| By both sectors in equal levels | FR<br>HU*<br>IT*<br>ES<br>TR<br>UK |
| Very few plant breeding         | SE                                 |

\* For these countries, private companies are mostly interested in major crops.

## 8. Is there significant cooperation between the two sectors to create new varieties?

No significant cooperation: BG, IT, SE, TR.

Significant cooperation: BE, CZ, ES, FR, DE, HU, PT, RO, UK

For Bulgaria, Italy and Turkey, there is almost no cooperation because international companies are not interested in cooperating with national public research.

For Hungary and the Czech Republic, there is only cooperation between national companies and public research to create new varieties but there is no significant cooperation between transnational companies and public research.

It is quite the opposite for Germany, Romania and Spain: there is significant cooperation between national public research and the private international sector.

## 9. What are the sources of financial support (private, government, EC) for public research in plant breeding?

| Sources                                | Countries                        |
|----------------------------------------|----------------------------------|
| Only governmental funds                | RO<br>TR                         |
| Mainly governmental funds              | CZ<br>FR<br>HU<br>PT<br>SE<br>UK |
| Both governmental and private funds    | BG*<br>DE<br>ES<br>IT*           |
| Mainly private funds                   | BE                               |
| Extra European and international funds | SE<br>UK                         |

\* For these two countries, the answers hint that there is financial support other than governmental funds but the kind of these funds is mixed (private companies, foundations).

NB: For Belgium, Bulgaria, Hungary and Italy, the financial support is limited and decreasing due to the economic crisis.

**Table S3. Queries used for searching papers related to biotic stress (BS) challenges and plant breeding techniques with Luxid®.**

| <b>Table S3a. BS challenges</b> |                                                                                                                                                                                                                                                                                                                                                                                                                                                                                                                                                                                                                                                                                                                                                                                                                                                                                                                                                                                                                                                                                                                                                                                                                                                                                                                |
|---------------------------------|----------------------------------------------------------------------------------------------------------------------------------------------------------------------------------------------------------------------------------------------------------------------------------------------------------------------------------------------------------------------------------------------------------------------------------------------------------------------------------------------------------------------------------------------------------------------------------------------------------------------------------------------------------------------------------------------------------------------------------------------------------------------------------------------------------------------------------------------------------------------------------------------------------------------------------------------------------------------------------------------------------------------------------------------------------------------------------------------------------------------------------------------------------------------------------------------------------------------------------------------------------------------------------------------------------------|
| <b>Crop</b>                     | <b>Queries</b>                                                                                                                                                                                                                                                                                                                                                                                                                                                                                                                                                                                                                                                                                                                                                                                                                                                                                                                                                                                                                                                                                                                                                                                                                                                                                                 |
| Wheat                           | <p>Topic=("Leaf blotch" OR "Septoria tritici" OR "Mycosphaerella graminicola")</p> <p>Topic=("leaf rust" OR "Puccinia triticina") AND Topic=(Wheat OR triticum)</p> <p>Topic=("Stripe rust" OR "yellow rust" OR "Puccinia striiformis")</p> <p>Topic=("Wheat dwarf virus") AND Topic=("dwarf virus") AND Topic=(Wheat OR triticum)</p> <p>Topic=("Hessian fly" OR "Mayetiola destructor" OR Cecidomyiidae)</p> <p>Topic=(wheat OR triticum) AND (Chlorops OR (Chloropid NEAR fly) OR (gout NEAR fly)</p> <p>Topic=(wheat OR triticum) NEAR ("Drechslera tritici" OR "Pyrenophora tritici" OR "tan spot" OR "yellow leaf spot")</p> <p>Topic=((wheat OR triticum) NEAR ("take all" OR "Gaeumannomyces graminis" OR "Ophiobolus graminis"))</p> <p>Topic=(wheat OR triticum) AND (oscinella OR "frit fly")</p> <p>Topic=(wheat OR triticum) AND (oulema OR lema OR "leaf beetle" OR "leaf beetles")</p> <p>Topic=(wheat OR triticum) NEAR ("Pseudocercosporella herpotrichoides" OR eyespot)</p> <p>Topic=(wheat OR triticum) NEAR ("stem rust" OR "Puccinia graminis")</p> <p>Topic=(wheat OR triticum) NEAR ("Sitobion avenae" OR "Metopolophium dirhodum" OR "grain aphid" OR "grain aphids")</p> <p>Topic=(wheat OR triticum) NEAR ("Sitodiplosis mosellana" OR "Contarinia tritici" OR "blossom midge")</p> |
| Wheat & Barley                  | <p>Topic=("Sunn pest" OR "Eurygaster integriceps")</p> <p>Topic=("Corn Ground Beetle" OR "Zabrus tenebrioides")</p> <p>Topic=(Bunt OR smut OR "Ustilago tritici" OR "Tilletia caries" OR "Tilletia Leavis" OR "Tilletia contraversa" OR Ustilago OR Tilletia) AND Topic=(Barley OR "Hordeum vulgare" OR "cereal grain" OR Poaceae OR "wheat" OR "triticum" OR Triticeae)</p> <p>Topic=(Fusarios* OR "Fusarium graminearum" OR "Fusarium culmorum" OR fusariose* OR "Fusarium avenaceum" OR Fusarium) AND Topic=(Barley OR "Hordeum vulgare" OR "cereal grain" OR Poaceae OR "wheat" OR "triticum" OR Triticeae)</p> <p>Topic=("Powdery mildew" OR "Erysiphe graminis" OR "Blumeria graminis" OR mildew) AND</p> <p>Topic=(Barley OR "Hordeum vulgare" OR "cereal grain" OR Poaceae OR "wheat" OR "triticum" OR Triticeae)</p>                                                                                                                                                                                                                                                                                                                                                                                                                                                                                  |
| Barley                          | <p>Topic="barley midge"</p> <p>Topic="Barley rust" OR "Puccinia hordei"</p> <p>Topic=(rust) AND Topic=(Barley OR "Hordeum vulgare")</p> <p>Topic=("yellow dwarf virus") AND Topic=(Barley OR "Hordeum vulgare" OR "cereal grain" OR Poaceae OR "wheat" OR "triticum" OR Triticeae)</p> <p>Topic=(barley OR "Hordeum vulgare") NEAR ("Helminthosporium sativum" OR "Cochliobolus sativus" OR "Spot blotch")</p> <p>Topic=(barley OR "Hordeum vulgare") AND (oulema OR Lema OR "cereal leaf beetle" OR "cereal leaf beetles")</p> <p>Topic=(barley OR "Hordeum vulgare") NEAR ("oscinella frit" OR "frit fly")</p> <p>Topic=(barley OR "Hordeum vulgare") NEAR ("Chlorops pumilionis" OR (chloropid NEAR/3 fly) OR "gout fly" OR "gout flies")</p> <p>Topic=(barley OR "Hordeum vulgare") NEAR ("pyrenophora teres" OR "Helminthosporium teres" OR "net blotch")</p> <p>Topic=(barley OR "Hordeum vulgare") NEAR ("Rhynchosporium secalis" OR "leaf blotch")</p> <p>Topic=(barley OR "Hordeum vulgare") NEAR (Sitobion OR Metopolophium OR "grain aphid" OR "grain aphids")</p>                                                                                                                                                                                                                                  |

|           |                                                                                                                                                                                                                                                                                                                                                                                                                                                                                                                                                                                                                                                                                                                                                                                                                                                                                                                                                                                                                                                                                                                                                                                                                                                                                                                   |
|-----------|-------------------------------------------------------------------------------------------------------------------------------------------------------------------------------------------------------------------------------------------------------------------------------------------------------------------------------------------------------------------------------------------------------------------------------------------------------------------------------------------------------------------------------------------------------------------------------------------------------------------------------------------------------------------------------------------------------------------------------------------------------------------------------------------------------------------------------------------------------------------------------------------------------------------------------------------------------------------------------------------------------------------------------------------------------------------------------------------------------------------------------------------------------------------------------------------------------------------------------------------------------------------------------------------------------------------|
|           | <p>Topic=(barley OR "Hordeum vulgare") NEAR (Rhopalosiphum OR "wheat aphid" OR "wheat aphids")</p> <p>Topic=(barley OR "Hordeum vulgare") NEAR (wheat NEAR/1 "dwarf virus")</p>                                                                                                                                                                                                                                                                                                                                                                                                                                                                                                                                                                                                                                                                                                                                                                                                                                                                                                                                                                                                                                                                                                                                   |
| Maize     | <p>Topic=("Common smut" OR "Ustilago zeae" OR Ustilago OR Smut) AND Topic=("Zea mays" OR corn OR Maize)</p> <p>Topic=("European corn borer" OR "Ostrinia nubilalis" OR "corn borer")</p> <p>Topic=("Corn Rootworm" OR "Diabrotica")</p> <p>Topic=(Wireworm* OR Elateridae)</p> <p>Topic=(maize OR "Zea mays") NEAR ("Heliothis armigera" OR "Helicoverpa armigera" OR "cotton bollworm")</p> <p>Topic=(maize OR "Zea mays") NEAR ("Tanymericus dilaticollis" OR "corn weevil")</p> <p>Topic=(maize OR "Zea mays") NEAR ("Sesamia nonagrioides" OR "corn stalk borer")</p> <p>Topic=(maize OR "Zea mays") AND (Scutigerella OR symphylan*)</p> <p>Topic=(maize OR "Zea mays") NEAR (tetranychus OR "spider mite" OR "spider mites")</p> <p>Topic=(maize OR "Zea mays") NEAR ("cereal fly" OR "cereal flies" OR geomyza OR oscin*)</p> <p>Topic=(maize OR "Zea mays") NEAR ("Zyginidia scutellaris" OR leafhopper*)</p> <p>Topic=(maize OR "Zea mays") NEAR (aphid* OR "Metopolophium dirhodum" OR "Sitobion avenae")</p> <p>Topic=(maize OR "Zea mays") NEAR ((corn NEAR maggot) OR delia)</p> <p>Topic=(maize OR "Zea mays") NEAR (cutworm* OR agrotis)</p> <p>Topic=(maize OR "Zea mays") NEAR (Fusari*)</p> <p>Topic=(maize OR "Zea mays") NEAR (Exserohilum OR Helminthosporium OR "northern leaf blight")</p> |
| Sunflower | <p>Topic=("Broomrape" OR "Orobanche cumana" OR "Sunflower Broomrape" OR "Orobanche")</p> <p>Topic=("Phoma Black Stem" OR "Phoma macdonaldii")</p> <p>Topic=("Puccinia helianthi")</p> <p>Topic=(rust) AND Topic=(Sunflower OR "Helianthus annuus")</p> <p>Topic=(sunflower OR "Helianthus annuus") NEAR Sclerotinia</p> <p>Topic=(sunflower OR "helianthus annuus") NEAR Botrytis</p> <p>Topic=(sunflower OR "helianthus annuus") NEAR (phomopsis OR diaporthes)</p> <p>Topic=(sunflower OR "helianthus annuus") NEAR Verticillium</p> <p>Topic=(sunflower OR "helianthus annuus") NEAR (Macrophomina OR "charcoal rot")</p> <p>Topic=(sunflower OR "helianthus annuus") NEAR ((white NEAR/2 rust) OR "blister rust" OR pustula)</p> <p>Topic=(sunflower OR "helianthus annuus") NEAR (wireworm* OR "wire worm" OR "wire worms" OR agrotis OR elaterid* OR "Click beetle" OR "click beetles")</p> <p>Topic=(sunflower OR "helianthus annuus") AND (aphis OR blackfl* OR "black fly" OR "black flies" OR aphid* OR brachycaudus)</p> <p>Topic=(sunflower OR "helianthus annuus") AND (ambrosia OR ragweed*)</p>                                                                                                                                                                                                    |
| Grapevine | <p>Topic=("leafroll" OR GLRV OR "leafroll-associated virus*" OR fanleaf OR GFLV OR GFV)</p> <p>Topic=("Powdery mildew" OR "Erysiphe necator" OR "Uncinula necator") AND Topic=(grapevine OR vitis OR grape*)</p> <p>Topic=("Downy mildew" OR "Plasmopara viticola")</p> <p>Topic=(grapevine* OR "grape vine" OR vitis OR vineyard*) NEAR ((gray near/2 mold) OR botryotinia OR botrytis)</p> <p>Topic=(grapevine* OR "grape vine" OR vitis OR vineyard*) AND (leafroller* OR "leaf roller" OR "leaf rollers" OR sparganothis)</p> <p>Topic=(grapevine* OR "grape vine" OR vitis OR vineyard*) NEAR (Eriophyes OR Colomerus OR Phytomyza OR ((blister OR bud OR erineum OR eryophid) near/2 mite*))</p> <p>Topic=(grapevine* OR "grape vine" OR vitis OR vineyard*) NEAR ((spider near/2 mite*) OR eotetranychus OR tetranychus)</p> <p>Topic=(grapevine* OR "grape vine" OR vitis OR vineyard*) NEAR (Lobesia OR Eupoecilia OR Polychrosis OR (european near/3 moth*) OR eudemis OR "vine moth" OR "vine moths")</p> <p>Topic=(grapevine* OR "grape vine" OR vitis OR vineyard*) NEAR (Argyrotaenia OR Eulia OR Tortrix)</p>                                                                                                                                                                                      |

|                      |                                                                                                                                                                                                                                                                                                                                                                                                                                                                                                                                                                                                                                                                                                                                                                                                                                                                                                                                                                                                                                                                                                                                                                                                                                                                                                                                                                                                                                                                                                        |
|----------------------|--------------------------------------------------------------------------------------------------------------------------------------------------------------------------------------------------------------------------------------------------------------------------------------------------------------------------------------------------------------------------------------------------------------------------------------------------------------------------------------------------------------------------------------------------------------------------------------------------------------------------------------------------------------------------------------------------------------------------------------------------------------------------------------------------------------------------------------------------------------------------------------------------------------------------------------------------------------------------------------------------------------------------------------------------------------------------------------------------------------------------------------------------------------------------------------------------------------------------------------------------------------------------------------------------------------------------------------------------------------------------------------------------------------------------------------------------------------------------------------------------------|
|                      | Topic=(grapevine* OR "grape vine" OR vitis OR vineyard*) NEAR (Scaphoideus OR (American near/2 leafhopper*) OR Flavescence OR "Bois noir" OR "Black wood" OR "Grapevine yellows" OR "Grapevine yellow" OR phytoplasma*)                                                                                                                                                                                                                                                                                                                                                                                                                                                                                                                                                                                                                                                                                                                                                                                                                                                                                                                                                                                                                                                                                                                                                                                                                                                                                |
| Potato               | Topic=("Golden nematode" OR "Globodera rostochiensis")<br>Topic=("Aecidium cantense")<br>Topic=("Deforming rust") AND Topic=(Potato* OR "Solanum tuberosum" OR Solanace*)<br>Topic=("Phytophthora infestans")<br>Topic=("Late blight") AND Topic=(Potato* OR "Solanum tuberosum" OR Solanace*)<br>Topic=("Potato virus Y")<br>Topic=(potato* OR "Solanum tuberosum") NEAR ("Alternaria solani" OR "early blight")<br>Topic=(potato* OR "Solanum tuberosum") NEAR ((potato NEAR/4 aphid*) OR macrosiphum OR Siphonophora)<br>Topic=(potato* OR "Solanum tuberosum") NEAR (Leptinotarsa OR Chrysomela OR Doryphora OR Polygramma OR beetle* OR spearman OR "potato bug" OR "potato bugs")<br>Topic=(potato* OR "Solanum tuberosum") NEAR "leafroll virus" NEAR (resistan* OR toleran*)                                                                                                                                                                                                                                                                                                                                                                                                                                                                                                                                                                                                                                                                                                                   |
| Oilseed Rape         | Topic=("Sawfly" OR "Athalia rosae")<br>Topic=("Flea beetle*" OR "Psylliodes chrysocephala")<br>Topic=("Pollen beetle" OR "Meligethes aeneus")<br>Topic=("Brassica napus" OR rapeseed* OR "rape" OR "oilseed rape" OR canola) NEAR (Pseudocercospora OR (white NEAR/3 spot))<br>Topic=("Brassica napus" OR rapeseed* OR "rape" OR "oilseed rape" OR canola) AND (Mycosphaerella OR "ring spot" OR ringspot)<br>Topic=("Brassica napus" OR rapeseed* OR "rape" OR "oilseed rape" OR canola) NEAR ("verticillium longisporum" OR wilt)<br>Topic=("Brassica napus" OR rapeseed* OR "rape" OR "oilseed rape" OR canola) NEAR ("Erysiphe cruciferarum" OR "powdery mildew")<br>Topic=("Brassica napus" OR rapeseed* OR "rape" OR "oilseed rape" OR canola) NEAR ("Hyaloperonospora parasitica" OR "downy mildew")<br>Topic=("Brassica napus" OR rapeseed* OR "rape" OR "oilseed rape" OR canola) NEAR ("cabbage aphid" OR "cabbage aphids" OR brevicoryne)<br>Topic=("Brassica napus" OR rapeseed* OR "rape" OR "oilseed rape" OR canola) NEAR ("terminal bud weevil" OR "terminal bud weevils" OR "Ceutorhynchus picipitarsis" OR "Ceutorhynchus picipitarsis" OR "stem weevil" OR "stem weevils")<br>Topic=("Brassica napus" OR rapeseed* OR "rape" OR "oilseed rape" OR canola) NEAR ("cabbage root fly" OR "cabbage root flies" OR "delia radicum" OR maggot)<br>Topic=("Brassica napus" OR rapeseed* OR "rape" OR "oilseed rape" OR canola) NEAR ("green peach aphid" OR "green peach aphids" OR myzus) |
| All Brassica species | Topic=("Gray leaf spot" OR "Alternaria Brassicae")<br>Topic=(Sclerotinia OR "Sclerotinia sclerotiorum")<br>Topic=("Black Leg" OR "Phoma linga" OR "Leptosphaeria maculans")<br>Topic=(Clubroot OR "Plasmodiophora Brassicae")<br>Topic=("Cabbage seed weevil" OR "Ceutorhynchus napi")<br>Topic=("Brassica pod midge" OR "Dasineura Brassicae")                                                                                                                                                                                                                                                                                                                                                                                                                                                                                                                                                                                                                                                                                                                                                                                                                                                                                                                                                                                                                                                                                                                                                        |
| Sugarbeet            | Topic=(beet\$ OR sugarbeet* OR "beta vulgaris") NEAR cercospor<br>Topic=(beet\$ OR sugarbeet* OR "beta vulgaris") AND ramulari*<br>Topic=(beet\$ OR sugarbeet* OR "beta vulgaris") NEAR (mildew OR erysiphe)<br>Topic=(beet\$ OR sugarbeet* OR "beta vulgaris") AND (rust\$ OR Uromyces OR Nigredo OR Uredo)<br>Topic=(beet\$ OR sugarbeet* OR "beta vulgaris") AND rhizopus<br>Topic=(beet\$ OR sugarbeet* OR "beta vulgaris") NEAR (rhizoctonia OR "foliar blight" OR Moniliopsis OR "damping off" OR (crown NEAR/3 rot) OR "root rot")<br>Topic=(beet\$ OR sugarbeet* OR "beta vulgaris") NEAR ("leaf miner" OR "leaf miners" OR "leaf mine" OR "leaf mines" OR Pegomya OR Anthomyia OR Anthomyza OR "beet fly" OR "beet flies")                                                                                                                                                                                                                                                                                                                                                                                                                                                                                                                                                                                                                                                                                                                                                                    |

Topic=(beet\$ OR sugarbeet\* OR "beta vulgaris") AND ("flea beetle" OR "flea beetles" OR chaetocnema OR "beet flea" OR "beet fleas")

Topic=(beet\$ OR sugarbeet\* OR "beta vulgaris") AND (Wireworm\* OR "click beetle" OR "click beetles" OR (striped near/2 beetle\*) OR elaterid\* OR Agriotes)

Topic=(beet\$ OR sugarbeet\* OR "beta vulgaris") AND ((crane near/2 fly) OR ((crane near/2 flies) OR cranefl\* OR longleg\*)

Topic=(beet\$ OR sugarbeet\* OR "beta vulgaris") AND (Scrobipalpa OR Phthorimaea or Gnorimoschema OR Lita OR "beet moth" OR "beet moths" OR "sugarbeet moth" OR "sugarbeet moths")

Topic=(beet\$ OR sugarbeet\* OR "beta vulgaris") NEAR (aphid\* OR "black fly" OR "black flies" OR "green fly" OR "green flies" OR blackfl\* OR greenfl\* OR aphid OR myzus)

Topic=(beet\$ OR sugarbeet\* OR "beta vulgaris") NEAR (eelworm\* OR nematod\* OR Heterodera OR Tylenchus OR Heterobolbus)

Topic=(beet\$ OR sugarbeet\* OR "beta vulgaris") NEAR ("western yellow virus" OR "western yellows virus" OR "beet yellowing virus" OR "beet mild yellowing virus")

Topic=(beet\$ OR sugarbeet\* OR "beta vulgaris") NEAR ((necrotic Near/4 virus) OR (vein NEAR/2 virus) OR rhizomania OR madness OR polomyxa)

Topic=(beet\$ OR sugarbeet\* OR "beta vulgaris") NEAR "mosaic virus"

---

|       |                                                                                                                                                                                                                                                                                                                                                                                                                                                                                                                                                                                                                                                                                                                                                                                                                                                          |
|-------|----------------------------------------------------------------------------------------------------------------------------------------------------------------------------------------------------------------------------------------------------------------------------------------------------------------------------------------------------------------------------------------------------------------------------------------------------------------------------------------------------------------------------------------------------------------------------------------------------------------------------------------------------------------------------------------------------------------------------------------------------------------------------------------------------------------------------------------------------------|
| Olive | <p>Topic=(olea OR olive*) NEAR (Spilocea OR Cycloconium OR "Peacock spot" OR (olive near/2 spot) OR "leaf spot" OR Spilocaea OR Fusicladium)</p> <p>Topic=(olea OR olive*) NEAR verticilli*</p> <p>Topic=(olea OR olive*) NEAR (anthracnose* OR colletotrichum)</p> <p>Topic=((olea OR olive*) NEAR (Pseudomonas OR knot)) NOT nematode*</p> <p>Topic=(olea OR olive*) NEAR ((olive* near/3 fly) OR (olive* near/3 flies) OR Bactrocera OR Dacus OR Musca)</p> <p>Topic=(olea OR olive*) NEAR ((leaf near/2 moth*) OR (jasmine near/2 moth*) OR (leaf near/2 worm*) OR (bud\$ near/2 moth*) OR palpita OR Margaronia)</p> <p>Topic=(olea OR olive*) NEAR (((leopard OR pyralid) near/2 moth*) OR Zeugera OR Euzophera OR Phalaena OR Phalaena)</p> <p>Topic=(olea OR olive*) NEAR ("olive moth" OR "olive moths" OR (kernel near/2 borer*) OR prays)</p> |
|-------|----------------------------------------------------------------------------------------------------------------------------------------------------------------------------------------------------------------------------------------------------------------------------------------------------------------------------------------------------------------------------------------------------------------------------------------------------------------------------------------------------------------------------------------------------------------------------------------------------------------------------------------------------------------------------------------------------------------------------------------------------------------------------------------------------------------------------------------------------------|

---

**Table S3b. Plant breeding techniques**

| Key-words of technique                                       | Synonymous                                                        |
|--------------------------------------------------------------|-------------------------------------------------------------------|
| Mass selection                                               |                                                                   |
| Mutagenesis                                                  | artificial mutagenesis<br>chemical mutagenesis                    |
| Pedigree selection                                           |                                                                   |
| Protoplast fusion                                            |                                                                   |
| Recurrent selection                                          |                                                                   |
| Single Seed Descent                                          |                                                                   |
| Wide crosses                                                 |                                                                   |
| Agro-infiltration                                            | agro-infection<br>agro-infiltration 'sensu stricto'<br>floral dip |
| Agro-inoculation                                             |                                                                   |
| Cisgenesis                                                   |                                                                   |
| Intragenesis                                                 |                                                                   |
| Grafting on GM rootstocks                                    |                                                                   |
| Oligonucleotide-Directed Mutagenesis                         | ODM                                                               |
| Reverse breeding                                             |                                                                   |
| RNA-dependent DNA methylation                                | RdDM                                                              |
| Zinc-Finger Nuclease                                         | ZFN-1<br>ZFN-2<br>ZFN-3                                           |
| Transgenesis                                                 | agrobacterium mediated, <i>Agrobacterium tumefaciens</i>          |
| Biolistics                                                   |                                                                   |
| RNAi                                                         |                                                                   |
|                                                              | TALEN                                                             |
| Clustered Regularly Interspaced Short<br>Palindromic Repeats | CRISPR, CRISPR/Cas9                                               |



**Table S4**

**Queries used with the Search tool of Questel Orbit for searching Patents about Biotic Stress (BS) challenges according to pests/diseases and crop.**

| CROP                                           | QUERIES                                                                                                                                                                                                                                                                                                                                                                                                                                                                                                                                                                                        |
|------------------------------------------------|------------------------------------------------------------------------------------------------------------------------------------------------------------------------------------------------------------------------------------------------------------------------------------------------------------------------------------------------------------------------------------------------------------------------------------------------------------------------------------------------------------------------------------------------------------------------------------------------|
| <b>Wheat</b>                                   | ( ((wheat OR triticum))/TI/AB/IW ET ("Leaf blotch" OR Septoria OR Mycosphaerella OR rust OR Puccinia OR "dwarf virus" OR Mayetiola OR Cecidomyiidae OR Chlorop+ OR fly OR Drechslera OR Pyrenophora OR spot OR "take all" OR Gaeumannomyces OR Ophiobolus OR Oscinella OR oulema OR lema OR beetle+ OR Pseudocercospora OR eyespot OR Sitobion OR Metopolophium OR aphid+ OR Sitodiplosis OR Contarinia OR midge OR "Sunn pest" OR Eurygaster OR Zabrus OR Bunt OR smut OR Ustilago OR Tilletia OR Fusari+ OR Erysiphe OR Blumeria OR mildew))/TI/AB/IW AND (Resistan+ OR toleran+)/TI/AB/IW ) |
| <b>Barley</b>                                  | ( (Barley OR Hordeum)/TI/AB/IW AND ("Sunn pest" OR Eurygaster OR Beetle+ OR Zabrus OR Bunt OR smut OR Ustilago OR Tilletia OR Fusari+ OR mildew OR Erysiphe OR Blumeria OR midge OR rust OR Puccinia OR "dwarf virus" OR Helminthosporium OR Cochliobolus OR blotch OR oulema OR Lema OR beetle+ OR oscinella OR fly OR flies OR Chlorop+ OR pyrenophora OR Helminthosporium OR blotch OR Rhynchosporium OR Sitobion OR Metopolophium OR aphid+ OR Rhopalosifum)/TI/AB/IW AND (Resistan+ OR toleran+)/TI/AB/IW )                                                                               |
| <b>Maize</b>                                   | ( ("Zea mays" OR corn OR Maize)/TI/AB/IW AND (smut OR Ustilago OR borer+ OR Ostrinia OR Rootworm+ OR Diabrotica OR Wireworm+ OR Elaterid+ OR Heliothis OR Helicoverpa OR bollworm+ OR Tanymericus OR weevil+ OR Sesamia OR Scutigerella OR symphylan+ OR tetrany+ OR mite OR mites OR fly OR flies OR geomyza OR oscin+ OR Zyginidia OR leafhopper+ OR aphid+ OR Metopolophium OR Sitobion OR maggot+ OR delia OR cutworm+ OR agrotis OR Fusari+ OR Exserohilum OR Helminthosporium OR blight)/TI/AB/IW AND (Resistan+ OR toleran+)/TI/AB/IW )                                                 |
| <b>Oilseed rape -<br/>Brassica all species</b> | ( (Brassica OR rapeseed+ OR "oilseed rape" OR canola)/TI/AB/IW AND (Sawfly OR Athalia OR Flea OR beetle+ OR Psylliodes OR Meligethes OR Pseudocercospora OR spot OR Mycosphaerella OR ringspot OR verticillium OR wilt OR Erysiphe OR mildew OR Hyaloperonospora OR aphid+ OR brevicoryne OR weevil+ OR Ceutorhynchus OR fly OR flies OR delia OR maggot OR myzus OR Alternaria OR Sclerotinia OR « Black Leg » OR Phoma OR Leptosphaeria OR Clubroot OR Plasmodiophora OR Dasineura)/TI/AB/IW AND (Resistan+ OR toleran+)/TI/AB/IW )                                                          |
| <b>Sunflower</b>                               | ( (Sunflower OR Helianthus)/TI/AB/IW AND (Broomrape OR Orobancha OR Phoma OR "Black Stem" OR Puccinia OR Rust OR Sclerotinia OR Botrytis OR phomopsis OR diaporthe OR Verticillium OR Macrophomina OR "charcoal rot" OR pustula OR wireworm+ OR "wire worm" OR "wire worms" OR agrotis OR elaterid+ OR beetle+ OR aphid+ OR blackfl+ OR "black fly" OR "black flies" OR aphid+ OR brachycaudus OR ambrosia OR ragweed+)/TI/AB/IW AND (Resistan+ OR toleran+)/TI/AB/IW )                                                                                                                        |

|                         |                                                                                                                                                                                                                                                                                                                                                                                                                                                                                                                                                                                                                                                                                                                                                             |
|-------------------------|-------------------------------------------------------------------------------------------------------------------------------------------------------------------------------------------------------------------------------------------------------------------------------------------------------------------------------------------------------------------------------------------------------------------------------------------------------------------------------------------------------------------------------------------------------------------------------------------------------------------------------------------------------------------------------------------------------------------------------------------------------------|
| <b>Grapevine</b>        | ( (grapevine OR vitis OR grape+)/TI/AB/IW AND (Leafroll+ OR GLRV OR fanleaf OR GFLV OR GFV OR mildew OR Erysiphe OR Uncinula OR Plasmopara OR mold OR botryotinia OR botrytis OR "leaf roller" OR "leaf rollers" OR sparganothis OR Eriophyes OR Colomerus OR Phytoptus OR blister+ OR erineum OR eryophid+ OR mite OR mites OR eotetranychus OR tetranychus OR Lobesia OR Eupoecilia OR Polychrosis OR moth+ OR eudemis OR Argyrotaenia OR Eulia OR Tortrix OR Scaphoideus OR leafhopper+ OR Flavescence OR "Bois noir" OR "Black wood" OR "Grapevine yellows" OR "Grapevine yellow" OR phytoplasma+)/TI/AB/IW AND (Resistan+ OR toleran+)/TI/AB/IW )                                                                                                      |
| <b>Potato</b>           | ((potato+ OR "Solanum tuberosum")/TI/AB/IW AND (Nematod+ OR Globodera OR Aecidium OR rust OR Phytophthora OR blight OR "virus Y" OR Alternaria OR aphid+ OR macrosiphum OR Siphonophora OR Leptinotarsa OR Chrysomela OR Doryphora OR Polygramma OR beetle+ OR spearman OR "potato bug" OR "potato bugs" OR "leafroll virus")/TI/AB/IW AND (Resistan+ OR toleran+)/TI/AB/IW )                                                                                                                                                                                                                                                                                                                                                                               |
| <b>Beet - Sugarbeet</b> | <p>( (beet OR sugarbeet OR "beta vulgaris")/TI/AB/IW AND (Cercospor+ OR ramulari+ OR mildew OR erysiphe OR rust OR Uromyces OR Nigredo OR Uredo OR rhizopus OR rhizoctonia OR blight OR Moniliopsis OR damping OR rot OR "leaf miner" OR "leaf miners" OR "leaf mine" OR "leaf mines" OR Pegomya OR Anthomyia OR Anthomyza OR fly OR</p> <p>Flies OR beetl+ OR chaetocnema OR flea OR fleas OR Wireworm+ OR elaterid+ OR Agriotes OR cranepl+ OR longleg+ OR Scrobipalpa OR Phthorimaea OR Gnorimoschema OR Lita OR moth OR moths OR aphid+ OR blackfl+ OR greenfl+ OR aphid OR myzus OR eelworm+ OR nematod+ OR Heterodera OR Tylenchus OR Heterobolbus OR virus OR rhizomania OR madness OR polymyxa)/TI/AB/IW AND (Resistan+ OR toleran+)/TI/AB/IW )</p> |
| <b>Olive</b>            | ( (olea OR olive+)/TI/AB/IW AND (Spilocea OR Cycloconium OR spot OR Spilocaea OR Fusicladium OR anthracn+ OR colletotrichum OR Pseudomonas OR knot OR fly OR flies OR Bactrocera OR Dacus OR Musca OR moth+ OR worm+ OR palpita OR Margaronia OR pyralid+ OR Zeuzera OR Euzophera OR Phalaena OR borer+ OR Pray+)/TI/AB/IW AND (Resistan+ OR toleran+)/TI/AB/IW )                                                                                                                                                                                                                                                                                                                                                                                           |

---

### **Supplementary Material 3.**

#### **List of biotic stress (BS) challenges per crop in the various selected countries in Europe**

##### **Legend:**

+ means that less than 25% of the crop area is affected by the pathogen/pest,

++ means that between 25% and 50% of the crop area is affected by the pathogen/pest,

+++ means that more than 50% of the crop area is affected by the pathogen/pest.

The sign corresponds to a mean of three years of observation in crop areas.

##### **Abbreviations:**

Belgium (BE), Bulgaria (BG), the Czech Republic (CZ), France (FR), Germany (DE), Hungary (HU), Italy (IT), Portugal (PT), Romania (RO), Spain (ES), Sweden (SE), Turkey (TR), and the United Kingdom (UK).

##### **Devoted research programs in the public sector** (see Supplementary Material 6):

In blue: BS challenge dealt with by a public research program not involving a GM tool. Some research programs are carried out in countries where the particular pest / pathogen is not a major problem, here the BS is coloured but with no '+'.  
In green: same as in blue but using transgenesis T (or at least as a research tool).

Programs generating knowledge about basic mechanisms were not included. Only programs designed to provide elements of resistance in varieties are taken into account.

# Example of a former BS challenge currently resolved by breeding of resistant varieties.

\* BS challenges not addressed in any paper (71).

Note that a challenge can be due to several agents.

In red: 'neglected' BS challenges (51) not identified in the current European public research programs or in the recent literature search (see Supplementary Material 4 and 5); 1 of them was concerned with field trials in Europe (see Supplementary Material 7) and 11 of them have been dealt with European or not European Patents (See Supplementary Material 8).

Patents (public and private sectors) were identified using the database Questel Orbit (last updated on 17.12.2014). E= European Patents; NE= Non-European Patents.



|               |                                         |                                                                                                           |               |           |           |           |           |           |           |           |           |           |           |           |           |           |
|---------------|-----------------------------------------|-----------------------------------------------------------------------------------------------------------|---------------|-----------|-----------|-----------|-----------|-----------|-----------|-----------|-----------|-----------|-----------|-----------|-----------|-----------|
|               | midge                                   |                                                                                                           |               |           |           |           |           |           |           |           |           |           |           |           |           |           |
|               | Cereal leaf beetle                      | <i>Oulema melanopus (Lema melanopa)</i>                                                                   |               |           | +         |           |           |           |           | +         |           |           |           |           |           |           |
|               | <b>Viral diseases</b>                   | Vector                                                                                                    |               |           |           |           |           |           |           |           |           |           |           |           |           |           |
|               | Wheat dwarf virus (WDV)                 | Leafhoppers                                                                                               |               |           | ++        |           |           |           | ++        | +         |           | ++        |           | +         |           | +         |
|               | Barley yellow dwarf virus (BYDV)        | Aphids                                                                                                    | E/NE          |           | ++        |           |           |           | ++        | +         |           | ++        |           | +         |           | +         |
| <b>Barley</b> | <b>Fungal diseases</b>                  |                                                                                                           | <b>Patent</b> | <b>BE</b> | <b>BG</b> | <b>CZ</b> | <b>FR</b> | <b>DE</b> | <b>HU</b> | <b>IT</b> | <b>PT</b> | <b>RO</b> | <b>ES</b> | <b>SE</b> | <b>TR</b> | <b>UK</b> |
|               | Barley leaf (brown) rust                | <i>Puccinia hordei</i>                                                                                    | E/NE          |           | ++        | +         | +         | +         | +         | +         | +         | +         | -         | ++        | +         | +         |
|               | Stem rust                               | <i>Puccinia graminis</i> <sup>#</sup>                                                                     | E/NE          |           | ++        | +         | +         | +         | +         | +         | +         | +         | -         | ++        | +         | +         |
|               | Bunts and smuts                         | <i>Ustilago tritici</i> , <i>Tilletia caries</i> , <i>T. laevis</i> , <i>T. controversa</i>               | NE            |           | ++        | +         |           | +         | +         | +         |           | ++        | +         |           | +         |           |
|               | Fusarioses (incl. Fusarium head blight) | <i>Fusarium graminearum</i> (head blight), <i>Fusarium</i> spp., <i>Microdochium</i> spp.                 | E/NE          |           |           | +         |           | +         | +         | +         | +         | +         |           |           |           | +         |
|               | Powdery mildew                          | <i>Blumeria (Erysiphe) graminis</i>                                                                       | NE            |           | ++        | +         | +         | +         | +         | ++        | ++        | ++        |           | +         | +         | +         |
|               | Spot blotch                             | <i>Bipolaris sorokiniana</i> (teleomorph: <i>Helminthosporium sativum</i> , <i>Cochliobolus sativus</i> ) |               |           | ++        | +         | +++       | +         | +         | ++        |           | +         |           |           |           |           |
|               | Net blotch                              | <i>Pyrenophora (Helminthosporium) teres</i>                                                               |               |           |           | ++        |           |           |           | +         | ++        | +         |           | ++        |           | ++        |
|               | Leaf blotch                             | <i>Rhynchosporium secalis</i>                                                                             |               |           |           | +         | ++        |           |           | +         | ++        |           |           |           |           | ++        |
|               | <b>Insect pests</b>                     |                                                                                                           |               |           |           |           |           |           |           |           |           |           |           |           |           |           |
|               | Sunn pest*                              | <i>Eurygaster integriceps</i>                                                                             |               |           | ++        |           |           |           | +         |           |           | +         |           |           | +         |           |
|               | Corn ground beetle*                     | <i>Zabrus tenebrioides</i>                                                                                |               |           | ++        |           |           |           | +         |           |           | ++        |           |           | +         |           |
|               | Grain aphid*                            | <i>Sitobion avenae</i>                                                                                    |               |           |           | +         | +         | +         |           | ++        | +         |           | -         | -         | +         |           |
|               | Rose-grain aphid*                       | <i>Metopolophium dirhodum</i>                                                                             |               |           |           |           |           |           |           |           |           |           |           |           |           |           |
|               | Bird cherry-out aphid (wheat aphid)*    | <i>Rhopalosiphum padi</i>                                                                                 |               |           |           |           |           |           |           |           |           |           |           |           |           |           |
|               | Cereal leaf beetle*                     | <i>Oulema melanopus (Lema melanopa)</i>                                                                   |               |           | ++        | +         |           | +         |           |           | +         | +         |           |           |           |           |
|               | Frit fly*                               | <i>Oscinella frit</i>                                                                                     |               |           |           | +         |           | +         | +         |           |           | +         |           |           |           |           |
|               | Chloropid gout fly*                     | <i>Chlorops pumilionis</i>                                                                                |               |           |           | +         |           |           | +         |           |           | +         |           |           |           |           |
|               | <b>Viral diseases</b>                   | Vector                                                                                                    |               |           |           |           |           |           |           |           |           |           |           |           |           |           |
|               | Barley yellow dwarf virus (BYDV)        | Aphids                                                                                                    | E/NE          |           | ++        | +         |           | +         | -         | +++       |           | +         | -         |           | +         | +         |
|               | Wheat dwarf virus                       | Leafhoppers                                                                                               | NE            |           |           | ++        |           |           | ++        |           |           | ++        |           |           |           |           |

|              |                                 |                                                                                         |        |    |    |     |        |    |    |    |     |     |        |    |    |    |  |
|--------------|---------------------------------|-----------------------------------------------------------------------------------------|--------|----|----|-----|--------|----|----|----|-----|-----|--------|----|----|----|--|
|              | (WDV)*                          |                                                                                         |        |    |    |     |        |    |    |    |     |     |        |    |    |    |  |
| Maize        | Fungal diseases                 |                                                                                         | Patent | BE | BG | CZ  | FR     | DE | HU | IT | PT  | RO  | ES     | SE | TR | UK |  |
|              | Common smut                     | <i>Ustilago zeae (U. maydis)</i>                                                        | E/NE   |    |    | +   |        | +  | +  | +  | +   | +   |        |    | +  |    |  |
|              | Fusarioses                      | <i>Fusarium</i> spp. (conidial form of <i>F. graminearum</i> : <i>Gibberella zeae</i> ) | E/NE   | +  |    | +   |        | +  | +  | ++ | +   | +   | -      |    |    | +  |  |
|              | Northern leaf blight            | <i>Setosphaeria turcica</i> (anamorph: <i>Exserohilum (Helminthosporium) turcicum</i> ) | E/NE   |    |    |     | +      |    |    |    |     |     |        |    |    |    |  |
|              | Insect (arthropod) pests        |                                                                                         | NE     |    |    |     |        |    |    |    |     |     |        |    |    |    |  |
|              | European corn borer             | <i>Ostrinia nubilalis</i>                                                               | E/NE   |    |    | ++  | ++     | +  | +  | ++ | ++  | +   | +      |    |    | ++ |  |
|              | Corn rootworm                   | <i>Diabrotica</i> spp.                                                                  | E/NE   |    | +  | +   |        | +  | +  | ++ |     | +   |        |    |    | +  |  |
|              | Wireworm (click beetle)*        | <i>Agriotes</i> spp.                                                                    | E      |    | ++ | +++ | +++    | ++ |    | +  | ++  | ++  | ++/+++ | +  |    | +  |  |
|              | Corn earworm (cotton bollworm)  | <i>Helicoverpa (Heliothis) armigera</i>                                                 | E/NE   |    |    |     |        |    |    |    | +   | +   | ++/+++ |    |    | +  |  |
|              | Maize leaf (gray corn) weevil * | <i>Tanymecus dilaticollis</i>                                                           |        |    |    |     |        |    | +  |    |     | +++ |        |    |    | +  |  |
|              | Mediterranean corn borer        | <i>Sesamia nonagrioides</i>                                                             |        |    |    |     | ++     |    |    | ++ | ++  |     |        |    |    | ++ |  |
|              | Symphylan*                      | <i>Scutigera immaculata</i>                                                             |        |    |    | +   | +      |    |    |    | +   |     |        |    |    |    |  |
|              | Spider mite*                    | <i>Tetranychus</i> spp.                                                                 |        |    |    | +   | + / ++ |    |    |    | +++ |     |        |    |    |    |  |
|              | Cereal fly*                     | <i>Geomyza</i> spp.                                                                     |        |    |    | +   | +      |    |    |    |     |     |        |    |    |    |  |
|              | Frit fly*                       | <i>Oscinella</i> spp.                                                                   |        |    |    |     |        |    |    |    |     |     |        |    |    |    |  |
|              | Leafhopper*                     | <i>Zyginidia scutellaris</i>                                                            |        |    |    | +   | +      |    |    |    |     |     |        |    |    |    |  |
|              | Maize orange leafhopper*        | <i>Cicadulina bipunctata</i>                                                            |        |    |    |     |        |    |    |    |     |     |        |    |    |    |  |
|              | Rose-grain aphid*               | <i>Metopolophium dirhodum</i>                                                           |        |    |    | +   | +      |    |    |    |     |     |        |    |    | +  |  |
|              | Grain aphid*                    | <i>Sitobion avenae</i>                                                                  |        |    |    |     |        |    |    |    |     |     |        |    |    |    |  |
|              | Corn seed maggot*               | <i>Delia platura</i>                                                                    |        |    |    | +   | +      |    |    |    |     |     |        |    |    |    |  |
|              | Cutworm*                        | <i>Agrotis</i> spp.                                                                     |        |    |    |     | +      | +  |    |    | ++  |     |        |    |    |    |  |
| Oilseed rape | Fungal diseases                 |                                                                                         | Patent | BE | BG | CZ  | FR     | DE | HU | IT | PT  | RO  | ES     | SE | TR | UK |  |
|              | Light leaf spot*                | <i>Pyrenopeziza brassicae</i>                                                           |        |    |    | ++  | ++     | +  |    | ++ |     | ++  |        |    |    | +  |  |
|              | Gray leaf spot*                 | <i>Alternaria brassicae</i>                                                             |        |    | +  |     | ++     | ++ | +  | ++ |     | +   |        | +  |    |    |  |
|              | Sclerotinia (white)             | <i>Sclerotinia sclerotiorum</i>                                                         | E/NE   |    | ++ | +   | +++    | +  | +  | +  |     | ++  |        | ++ |    | +  |  |

|                                    |                                                                              |               |           |           |           |           |           |           |           |           |           |           |           |           |           |
|------------------------------------|------------------------------------------------------------------------------|---------------|-----------|-----------|-----------|-----------|-----------|-----------|-----------|-----------|-----------|-----------|-----------|-----------|-----------|
| mold)                              |                                                                              |               |           |           |           |           |           |           |           |           |           |           |           |           |           |
| Blackleg (Phoma stem canker)       | <i>Leptosphaeria maculans</i> (anamorph: <i>Phoma lingam</i> )               | E/NE          | ++        | +         | ++        | +         | +         | +         |           |           | ++        |           | +         |           | +         |
| Clubroot                           | Rhizaria: <i>Plasmodiophora brassicae</i>                                    | E/NE          |           |           | +++       | +         |           |           | ++        |           | +         |           | ++        |           | +         |
| White leaf spot*                   | <i>Pseudocercospora capsellae</i>                                            |               |           | +         | ++        |           |           |           |           |           | -         |           |           |           |           |
| Ring spot*                         | <i>Mycosphaerella brassicicola</i>                                           | E             |           |           | ++        |           |           |           |           |           |           |           |           |           |           |
| Verticillium wilt                  | <i>Verticillium longisporum</i> (V. <i>dahliae</i> var. <i>longisporum</i> ) | E/NE          |           |           | ++        |           |           |           |           |           | +         |           |           |           |           |
| Powdery mildew*                    | <i>Erysiphe cruciferarum</i>                                                 |               |           | +         | ++        |           |           |           |           |           | +         |           |           |           | +         |
| Downy mildew*                      | <i>Hyaloperonospora brassicae</i>                                            | E/NE          |           |           | +         |           |           |           |           |           |           |           |           |           |           |
| <b>Insect pests</b>                |                                                                              |               |           |           |           |           |           |           |           |           |           |           |           |           |           |
| Rape stem weevil*                  | <i>Ceutorhynchus napi</i>                                                    |               | +         | +         | +++       | +         | +         |           |           |           | ++        |           |           | +         |           |
| Cabbage seed weevil                | <i>Ceutorhynchus assimilis</i>                                               |               | +         | +         | +         | +         | +         |           |           |           | ++        |           |           | +         |           |
| Stem weevil (terminal bud weevil)* | <i>Ceutorhynchus picitarsis</i>                                              |               |           |           | +++       | +         | -         |           |           |           | -         |           |           | -         |           |
| Brassica pod midge*                | <i>Dasineura brassicae</i>                                                   |               | ++        | +         | +++       | +         |           |           |           |           | ++        |           |           | +         | +         |
| Turnip sawfly*                     | <i>Athalia rosae</i>                                                         |               | +         | +         | +         |           | +         |           |           |           | ++        |           | +         | +         |           |
| Cabbage stem flea beetle*          | <i>Psylliodes chrysocephala</i>                                              | NE            | ++        | +         | ++        | +         | +         |           |           |           | ++        |           | +         | +         | +         |
| Pollen beetle*                     | <i>Meligethes aeneus</i>                                                     |               | +         | +         | ++        | ++        | +         |           |           |           | +         |           | +++       | +         | +         |
| Cabbage aphid*                     | <i>Brevicoryne brassicae</i>                                                 |               |           | +         | +++       |           |           |           |           |           | ++        |           |           |           |           |
| Green peach aphid (green fly)*     | <i>Myzus persicae</i>                                                        |               |           |           |           |           |           |           |           |           |           |           |           |           |           |
| Flea beetle*                       | <i>Phyllotreta</i> spp.                                                      |               | +         | +         |           |           |           |           |           |           |           |           |           |           |           |
| Cabbage root fly (maggot)*         | <i>Delia radicum</i>                                                         |               |           | +         | +         | +         |           |           |           |           |           |           |           |           |           |
| <b>Sunflower</b>                   | <b>Fungal diseases</b>                                                       | <b>Patent</b> | <b>BE</b> | <b>BG</b> | <b>CZ</b> | <b>FR</b> | <b>DE</b> | <b>HU</b> | <b>IT</b> | <b>PT</b> | <b>RO</b> | <b>ES</b> | <b>SE</b> | <b>TR</b> | <b>UK</b> |
|                                    | Downy mildew                                                                 | NE            |           | +         | +         | +++       | +         | +         |           | +         | +         |           |           | +         |           |
|                                    |                                                                              |               |           |           |           |           |           |           |           |           |           |           |           |           |           |
|                                    | Phoma black stem                                                             |               |           | ++        | ++        | +++       |           | ++        | +         | +         | ++        |           |           | +         |           |
|                                    | Rust                                                                         |               |           |           | +         | +         |           |           | ++        | +         |           |           |           | +         |           |
|                                    | Sclerotinia (white mold, basal stem rot, Sclerotinia head rot)               | E/NE          |           | ++        | +         | +++       | +         | +         | ++        | +         | ++        |           |           | +         |           |
|                                    | Botrytis bunch rot*                                                          | NE            |           |           | +         | ++        | +         | +         | +         | +         | +         |           |           | +         |           |

|           |                                                               |                                                                    |                            |    |    |     |            |            |    |    |    |     |     |    |    |    |
|-----------|---------------------------------------------------------------|--------------------------------------------------------------------|----------------------------|----|----|-----|------------|------------|----|----|----|-----|-----|----|----|----|
|           | Phomopsis stem canker*                                        | <i>Diaporthe helianthi</i>                                         | NE                         |    |    | +   | +++        |            |    |    |    | ++  |     |    |    |    |
|           | Verticillium wilt                                             | <i>Verticillium dahliae</i>                                        |                            |    |    | +   | ++         |            |    |    |    | +   |     |    | +  |    |
|           | Charcoal rot*                                                 | <i>Macrophomina phaseolina</i>                                     |                            |    |    | +   | +          |            |    |    |    | +   |     |    |    |    |
|           | White blister rust*                                           | <i>Pustula helianthicola</i>                                       |                            |    |    |     | +          |            |    |    |    |     |     |    |    |    |
|           | Insect pests                                                  |                                                                    |                            |    |    |     |            |            |    |    |    |     |     |    |    |    |
|           | Wireworm (click beetle)*                                      | <i>Agriotes</i> spp.                                               |                            | ++ | +  | +++ |            |            |    | +  | ++ | +   |     |    | +  |    |
|           | Black bean aphid (blackfly)*                                  | <i>Aphis fabae</i>                                                 |                            |    | +  | ++  | +          | +          | ++ |    |    |     |     |    |    |    |
|           | Leaf curl plum aphid *                                        | <i>Brachycaudus helichrysi</i>                                     |                            |    |    |     |            |            |    |    |    |     |     |    |    |    |
|           | Parasitic plant                                               | See footnote 1                                                     |                            |    |    |     |            |            |    |    |    |     |     |    |    |    |
|           | Sunflower broomrape                                           | <i>Orobanche cumana</i>                                            | E/NE                       | ++ | +  |     |            | +          |    |    | +  | +++ |     |    | ++ |    |
|           | Weed                                                          |                                                                    |                            |    |    |     |            |            |    |    |    |     |     |    |    |    |
|           | Common ragweed*                                               | <i>Ambrosia artemisiifolia</i>                                     |                            |    | +  |     |            | +          |    |    |    |     |     |    |    |    |
| Grapevine | Fungal diseases (see footnote 2 on Esca)                      |                                                                    | Patent                     | BE | BG | CZ  | FR         | DE         | HU | IT | PT | RO  | ES  | SE | TR | UK |
|           | Downy mildew                                                  | <i>Plasmopara viticola</i>                                         |                            |    | ++ | ++  | ++/<br>+++ | ++         | +  | ++ | ++ | ++  | ++  |    |    | +  |
|           | Powdery mildew                                                | <i>Erysiphe (Uncinula) necator</i>                                 | NE                         |    | ++ | ++  | ++/<br>+++ | ++         | +  | ++ | ++ | ++  | ++  |    |    | +  |
|           | Gray mold (grey mould, Botrytis bunch rot)*                   | <i>Botryotinia fuckeliana</i> (anamorph: <i>Botrytis cinerea</i> ) | E/NE                       |    | ++ | +   | ++         | +          | +  | ++ | ++ | ++  | ++  |    |    | +  |
|           | Insect (arthropod) pests                                      |                                                                    |                            |    |    |     |            |            |    |    |    |     |     |    |    |    |
|           | Grape leafroller*                                             | <i>Sparganothis pilleriana</i>                                     |                            |    |    | +   |            |            |    |    | +  |     | +++ |    |    |    |
|           | Grape leaf blister mite (grape bud mite, grape erineum mite)* | <i>Eriophyes (Colomerus, Phytoptus) vitis</i>                      |                            |    |    | +   |            |            |    |    | +  |     | +++ |    |    |    |
|           | Yellow spider mite*                                           | <i>Eotetranychus (Tetranychus) carpini</i>                         |                            |    | ++ |     |            |            |    |    | +  |     | +++ |    |    | +  |
|           | European grapevine moth*                                      | <i>Lobesia (Polychrosis) botrana</i>                               |                            |    | ++ | +   | ++/<br>+++ | +          |    | ++ | ++ | ++  | ++  |    |    | +  |
|           | Grapevine moth*                                               | <i>Eupoecilia ambiguella</i>                                       |                            |    |    |     |            |            |    |    |    |     |     |    |    |    |
|           | Grape tortrix*                                                | <i>Argyrotaenia ljugiana</i>                                       |                            |    |    |     | +++        |            |    |    |    |     |     |    |    |    |
|           | Virus like diseases                                           | Vector                                                             |                            |    |    |     |            |            |    |    |    |     |     |    |    |    |
|           |                                                               | Flavescence dorée*                                                 | <i>Scaphoideus titanus</i> | E  |    |     |            | ++/<br>+++ |    |    | ++ | +   |     |    |    |    |



|               |                                                                                    |                                                                                                      |               |           |           |           |           |           |           |           |           |           |           |           |           |           |
|---------------|------------------------------------------------------------------------------------|------------------------------------------------------------------------------------------------------|---------------|-----------|-----------|-----------|-----------|-----------|-----------|-----------|-----------|-----------|-----------|-----------|-----------|-----------|
|               | Bois noir (black wood)*                                                            | <i>Hyalesthes obsoletus</i> and other planthoppes                                                    |               |           |           |           |           |           | +++       |           |           |           |           |           |           |           |
|               | <b>Viral diseases</b>                                                              | Vector                                                                                               |               |           |           |           |           |           |           |           |           |           |           |           |           |           |
|               | Grapevine fanleaf virus (GFLV)                                                     | <i>Xiphinema index</i>                                                                               | E/NE          | ++        | +         | +         |           |           |           | ++        | +         |           |           |           | +         |           |
|               | Grapevine leafroll-associated virus (GLRaV) *                                      | Pseudococcidae<br>Coccidae                                                                           | E/NE          | ++        | +         | +         |           |           |           | ++        | +         | +         |           |           |           |           |
| <b>Potato</b> | <b>Fungal diseases</b>                                                             |                                                                                                      | <b>Patent</b> | <b>BE</b> | <b>BG</b> | <b>CZ</b> | <b>FR</b> | <b>DE</b> | <b>HU</b> | <b>IT</b> | <b>PT</b> | <b>RO</b> | <b>ES</b> | <b>SE</b> | <b>TR</b> | <b>UK</b> |
|               | Late blight                                                                        | <i>Phytophthora infestans</i>                                                                        | E/NE          | +++       | ++        | ++        | +++       | +++       | ++        | ++        | +         | +++       |           | +++       | +         | ++        |
|               | Deforming rust*                                                                    | <i>Aecidium cantense</i>                                                                             |               |           |           |           | +         |           |           |           | +         |           |           |           | +         |           |
|               | Early blight                                                                       | <i>Alternaria solani</i>                                                                             | NE            | ++        | ++        | +         |           | +         |           | ++        | +         | ++        |           | +         | +         |           |
|               | Potato aphid*                                                                      | <i>Macrosiphum euphorbiae</i> ( <i>Siphonophora solanifolii</i> )                                    | E/NE          |           |           |           | +         | +         |           | ++        |           | +         |           |           |           |           |
|               | Green peach aphid (green fly)                                                      | <i>Myzus persicae</i>                                                                                |               |           |           |           |           |           |           |           |           |           |           |           |           |           |
|               | Colorado potato beetle (ten-striped spearman, ten-lined potato beetle, potato bug) | <i>Leptinotarsa</i> ( <i>Chrysomela</i> , <i>Doryphora</i> , <i>Polygramma</i> ) <i>decemlineata</i> | NE            |           | ++        | +         | +         | ++        |           | +++       | ++        | +++       |           |           | ++        |           |
|               | <b>Nematode pests</b>                                                              |                                                                                                      |               |           |           |           |           |           |           |           |           |           |           |           |           |           |
|               | Potato cyst nematodes: golden nematode, pale cyst nematode                         | <i>Globodera rostochiensis</i><br><i>G. pallida</i>                                                  | E/NE          | +         |           | +         | +         |           | +         | +         | +         | +         |           |           |           |           |
|               | <b>Viral diseases</b>                                                              | Vector                                                                                               |               |           |           |           |           |           |           |           |           |           |           |           |           |           |
|               | Potato Virus Y (PVY)                                                               | Aphids                                                                                               | E/NE          |           | ++        | +++       | +         | ++        | ++        | +++       | +         | +         |           | +         | +         |           |
|               | Potato leafroll virus (PLRV)                                                       | Aphids                                                                                               | E/NE          |           |           | +++       |           | +         | ++        | ++        | +         | +         |           |           | +         |           |
| <b>Beet</b>   | <b>Fungal diseases</b>                                                             |                                                                                                      | <b>Patent</b> | <b>BE</b> | <b>BG</b> | <b>CZ</b> | <b>FR</b> | <b>DE</b> | <b>HU</b> | <b>IT</b> | <b>PT</b> | <b>RO</b> | <b>ES</b> | <b>SE</b> | <b>TR</b> | <b>UK</b> |
|               | Cercospora leaf spot                                                               | <i>Cercospora beticola</i>                                                                           |               | ++        |           | +         | +++       | ++        | +         | +++       | +         | ++        |           | +         | +         |           |
|               | Ramularia leaf spot*                                                               | <i>Ramularia beticola</i>                                                                            |               | ++        |           | +         | +++       | +         |           |           |           |           |           | ++        |           |           |
|               | Powdery mildew                                                                     | <i>Erysiphe betae</i> ( <i>E. polygoni</i> )                                                         | NE            | +         |           | +         | ++        |           | +         | +         | ++        | +         |           |           | +         |           |
|               | Rhizopus root rot*                                                                 | <i>Rhizopus stolonifer</i><br><i>R. arrhizus</i>                                                     |               |           |           | +         |           |           | +         |           |           |           |           |           |           |           |
|               | Rhizoctonia foliar blight                                                          | <i>Rhizoctonia</i> ( <i>Moniliopsis</i> ) <i>solani</i>                                              |               | +         |           |           | +++       |           |           | ++        | ++        | +         |           |           |           |           |

|       |                                                                    |                                                                                                      |        |    |    |    |        |     |    |     |     |    |    |    |    |    |
|-------|--------------------------------------------------------------------|------------------------------------------------------------------------------------------------------|--------|----|----|----|--------|-----|----|-----|-----|----|----|----|----|----|
|       | Crown/Root rot                                                     |                                                                                                      |        |    |    |    |        |     |    |     |     |    |    |    |    |    |
|       | Insect pests                                                       |                                                                                                      |        |    |    |    |        |     |    |     |     |    |    |    |    |    |
|       | Beet leaf miner*                                                   | <i>Pegomya hyoscyami</i>                                                                             |        |    |    | +  | +      | +   |    | +   | ++  |    |    |    | +  |    |
|       | Beet fly*                                                          | <i>P. betae</i> ( <i>Anthomyia betae</i> )                                                           |        |    |    |    |        |     |    |     |     |    |    |    |    |    |
|       | Flea beetle*                                                       | <i>Chaetocnema tibialis</i>                                                                          | NE     |    |    | +  |        |     |    |     |     | +  | +  |    | +  |    |
|       | Wireworm (click beetle)*                                           | <i>Agriotes</i> spp.                                                                                 |        |    |    | +  | ++     | +   |    | +   | +++ |    |    |    |    |    |
|       | Crane fly (daddy longlegs)*                                        | <i>Tipula</i> spp.                                                                                   |        |    |    | +  | ++     |     |    |     |     |    |    |    |    |    |
|       | Sugar beet moth*                                                   | <i>Scrobipalpa</i> ( <i>Phthorimaea</i> ,<br><i>Gnorimoschema</i> , <i>Lita</i> ) <i>ocellatella</i> |        |    |    | +  | +++    |     |    |     |     | ++ |    |    |    |    |
|       | Black bean aphid (black fly)*                                      | <i>Aphis fabae</i>                                                                                   |        |    |    | +  |        | +   |    | ++  |     |    |    |    |    |    |
|       | Green peach aphid (green fly)*                                     | <i>Myzus persicae</i>                                                                                |        |    |    |    |        |     |    |     |     |    |    |    |    |    |
|       | Nematode pests                                                     |                                                                                                      |        |    |    |    |        |     |    |     |     |    |    |    |    |    |
|       | Beet cyst eelworm (beet cyst nematode)*                            | <i>Heterodera</i> ( <i>Tylenchus</i> , <i>Heterobolbus</i> )<br><i>schachtii</i>                     | +      |    |    | +  | +++    | +++ | +  | +++ |     | +  |    | ++ | +  |    |
|       | Stem nematode (stem and bulb eelworm)*                             | <i>Ditylenchus dipsaci</i>                                                                           |        |    |    |    | ++     | ++  | +  | ++  |     |    |    |    |    |    |
|       | Viral diseases                                                     | Vector                                                                                               | E      |    |    |    |        |     |    |     |     |    |    |    |    |    |
|       | Beet western yellows virus (BWYV)*                                 | <i>Aphis fabae</i>                                                                                   | E/NE   |    |    | +  | +      | ++  |    | ++  |     |    |    |    |    |    |
|       | Beet mild yellowing virus (BMYW)                                   | <i>Myzus persicae</i>                                                                                |        |    |    |    |        |     |    |     |     |    |    |    |    |    |
|       | Beet necrotic yellow vein virus (BNYVV) causing Rhizomania disease | <i>Polymyxa betae</i>                                                                                | E/NE   |    |    | +  | +++    | ++  |    | +++ |     |    |    |    |    |    |
|       | Beet mosaic virus (BtMV)*                                          | <i>Aphis fabae</i><br><i>Myzus persicae</i>                                                          |        |    |    | +  |        | +   |    |     |     |    |    |    |    |    |
| Olive | Fungal diseases                                                    |                                                                                                      | Patent | BE | BG | CZ | FR     | DE  | HU | IT  | PT  | RO | ES | SE | TR | UK |
|       | Olive leaf spot (peacock spot)*                                    | <i>Spilocaea oleaginea</i> ( <i>Cycloconium</i> ( <i>Fusicladium</i> ) <i>oleaginum</i> )            |        |    |    |    | + / ++ |     |    | +   | ++  |    | ++ |    | +  |    |
|       | Verticillium wilt*                                                 | <i>Vertilicium dahliae</i>                                                                           |        |    |    |    | +      |     |    | +   | +   |    | ++ |    | +  |    |
|       | Anthracnose                                                        | <i>Colletrotichum acutatum</i> ( <i>C. cingulata</i> )                                               |        |    |    |    |        |     |    |     |     | ++ |    |    |    |    |
|       | Bacterial diseases                                                 |                                                                                                      |        |    |    |    |        |     |    |     |     |    |    |    |    |    |

|                                                        |                                                                        |    |      |     |    |    |   |
|--------------------------------------------------------|------------------------------------------------------------------------|----|------|-----|----|----|---|
| Olive-knot disease*                                    | <i>Pseudomonas syringae</i> pv. <i>savastanoi</i>                      | NE | +/++ | +   | +  |    | + |
| <b>Insect diseases</b>                                 |                                                                        |    |      |     |    |    |   |
| Olive fruit fly*                                       | <i>Bactrocera oleae</i> ( <i>Dacus</i> ( <i>Musca</i> ) <i>oleae</i> ) |    | +++  | +++ | ++ | ++ | + |
| Olive leaf moth<br>(jasmine moth, olive<br>leaf worm)* | <i>Palpita</i> ( <i>Margaronia</i> ) <i>unionalis</i>                  |    | +    |     | +  | +  |   |
| Leopard moth*                                          | <i>Zeuzera</i> ( <i>Phalaena</i> ) <i>pyrina</i> ( <i>P.esculi</i> )   |    | +    |     | ++ | +  |   |
| Olive pyralid moth*                                    | <i>Euzophera pinguis</i>                                               |    |      |     |    |    |   |
| Olive moth (olive<br>kernel borer)*                    | <i>Prays oleae</i> ( <i>P. oleellus</i> )                              |    | ++   | +   | ++ | -  | + |

**Note 1.** Orobanche, a parasitic plant, also occurs in OSR growing areas.

**Note 2.** Esca, which is a grapevine trunk disease, has not been dealt with in this study and is not indicated in the table, as it is caused by a complex of several fungal pathogens.

## Supplementary Material 4.

### Number of scientific articles according to pests/disease, crop, technique

**4a: Transgenesis**

**4b: Cisgenesis**

**4c: RNAi /silencing (stable and transient assays)**

**4d: Other transient assays**

**4e: Cloning of resistance gene**

**4f: Mutagenesis**

**4g: Conventional breeding**

**4h: Molecular markers used to tag resistance genes and for MAS**

Scientific papers concerning the identified biotic stress (BS) challenges were exhaustively analyzed over the period between January 2007 and January 2014. The CAB (Commonwealth Agricultural Bureaux), FSTA (Food Science and Technology Abstracts), PubMed (National Center for Biotechnology Information) and Web of Science (Thomson Reuters) databases were screened using queries built for each BS/crop pair (Table S3a of Supplementary Material 2) as well as for terms corresponding to plant breeding techniques (Table S3b) by using synonyms, Boolean and proximity operators and truncations. The resulting papers were first divided into thematic groups according to BS/crop pairs, then filtered further with Luxid® (a new text-mining software platform developed by Temis) according to plant breeding techniques (e.g. transgenesis or other plant breeding methods), BS and crop. Finally, papers remaining in these groups were manually selected as describing either a plant improvement project (leading to a breeding line with a new resistance trait) or a pre-breeding advance with high potential for direct application (such as identification of molecular markers which can be subsequently used for MAS, or transient assays describing a concept which can be transferred to stable transgenic lines). Articles on model plants for research (Arabidopsis, Nicotiana, ...) were not included. This compilation is not meant to be a comprehensive review of all upstream research on these BS challenges. On-going research programs are presented in Supplementary Material 6.

**Abbreviations:** RNAi, RNA interference; MAS, marker assisted selection.

In blue, private companies as a co-author (71 articles in total); in yellow, review (13 articles in total).

Some articles are classified in several sections (in bold).

### Supplementary Material 4a: Transgenesis

| Plant | Origin of transferred genes | Pests/Diseases | Country | University or lab | References |
|-------|-----------------------------|----------------|---------|-------------------|------------|
|-------|-----------------------------|----------------|---------|-------------------|------------|

|     |       |                                                                    |                            |                                 |                                                                                                                                                                                                                                               |                                                                                                                                                                                                                                                                                                         |
|-----|-------|--------------------------------------------------------------------|----------------------------|---------------------------------|-----------------------------------------------------------------------------------------------------------------------------------------------------------------------------------------------------------------------------------------------|---------------------------------------------------------------------------------------------------------------------------------------------------------------------------------------------------------------------------------------------------------------------------------------------------------|
| 1.  | Wheat | Wheat                                                              | Leaf rust                  | Australia<br>Switzerland        | CSIRO Plant Ind, Australia<br>Univ Zürich, Inst Plant Biol                                                                                                                                                                                    | Risk JM, Selter LL, Krattinger SG et al. 2012. Functional variability of the <i>Lr34</i> durable resistance gene in transgenic wheat. <i>Plant Biotechnol J</i> 10(4): 477-87.                                                                                                                          |
| 2.  | Wheat | Wheat                                                              | Leaf rust                  | China                           | Huazhong Univ Sci & Technol, China-UK HUST-RRes Genet Engineer & Genom Joint Lab                                                                                                                                                              | Luo L, Zhang JR, Yang GX et al. 2008. Expression of puroindoline a enhances leaf rust resistance in transgenic tetraploid wheat. <i>Mol Biol Rep</i> 35(2): 195-200.                                                                                                                                    |
| 3.  | Wheat | Wheat                                                              | Leaf rust                  | Canada<br>Switzerland<br>France | Agric & Agri-Food Canada, Cereal Res Ctr, Canada<br>Univ Zürich, Inst Plant Biol, Switzerland<br>Inst Natl Recherche Agronomique, Amélioration et Santé des Plantes, France                                                                   | Cloutier S, McCallum BD, Loutre C et al. 2007. Leaf rust resistance gene <i>Lr1</i> , isolated from bread wheat ( <i>Triticum aestivum</i> L.) is a member of the large <i>psr567</i> gene family. <i>Plant Mol Biol</i> 65(1-2): 93-106. <b>(also in Cloning of resistance gene and MAS, sections)</b> |
| 4.  | Wheat | Wheat                                                              | Leaf rust + Powdery mildew | Japan                           | Univ Tsukuba, Graduate School Life & Environm Sci<br>Natl Inst Agrobiol Sci, Plant Genome Res Unit                                                                                                                                            | Bahrinil, Ogawa T, Kobayashi F et al. 2011. Overexpression of the pathogen-inducible wheat <i>TaWRKY45</i> gene confers disease resistance to multiple fungi in transgenic wheat plants. <i>Breed Sci</i> 61(4): 319-26.                                                                                |
| 5.  | Wheat | <i>X. oryzae</i> pv. <i>oryzicola</i>                              | Powdery mildew             | China                           | National Ministry of Education Key Laboratory of Integrated Management of Crop Diseases and Insect Pests, Nanjing Agricultural University, China                                                                                              | Wang DF, Wang YJ, Fu MQ, Mu SY, Han B, Ji HT, Cai HS, Dong HS and Zhang CL (2014). Transgenic Expression of the Functional Fragment Hpa1(10-42) of the Harpin Protein Hpa1 Imparts Enhanced Resistance to Powdery Mildew in Wheat. <i>Plant Disease</i> 98 (4): 448-455.                                |
| 6.  | Wheat | Rice                                                               | Stripe rust                | China                           | Northwest Univ, Inst Life Sci, Key Lab Resour Biol & Biotechnoln Western China (Minist Educ)<br>Ankang Univ, Inst Agric & Life Sci                                                                                                            | Huang X, Wang J, Du Z et al. 2013. Enhanced resistance to stripe rust disease in transgenic wheat expressing the rice chitinase gene <i>RC24</i> . <i>Transgenic Res</i> 22(5): 939-47.                                                                                                                 |
| 7.  | Wheat | Wheat                                                              | Stripe rust                | China                           | Nanjing Agric Univ, Cytogenet Inst, Natl Key Lab Crop Genet & Germplasm Enhancement<br>Northwest A&F Univ: State Key Lab Crop Stress Biol Arid Areas; Coll Plant Protect                                                                      | Jiang ZN, Ge S, Xing LP et al. 2013. RLP1.1, a novel wheat receptor-like protein gene, is involved in the defence response against <i>Puccinia striiformis</i> f. sp. <i>tritici</i> . <i>J Exp Bot</i> 64(12): 3735-46.                                                                                |
| 8.  | Wheat | Synthetic derivate of dermaseptin from <i>Phyllomedusa bicolor</i> | Fusarium head blight       | Canada                          | Agric & Agri-Food Canada, Lethbridge Res Ctr<br>Univ Victoria, Dept Biochem & Microbiol                                                                                                                                                       | Badea A, Eudes F, Laroche A et al. 2008. Expression of 10R and MsrA2 peptides in transgenic wheat enhances resistance to Fusarium head blight. <i>Cereal Res Commun</i> 36 (Suppl. B): 279-80.                                                                                                          |
| 9.  | Wheat | Maize                                                              | Fusarium head blight       | Italy                           | Consiglio per la Ricerca e la Sperimentazione in Agricoltura (CRA), Maize Section<br>Univ di Milano, DISMA, Fac di Agraria                                                                                                                    | Balconi C, Lanzaova C, Conti E et al. 2007. Fusarium head blight evaluation in wheat transgenic plants expressing the maize <i>b-32</i> antifungal gene. <i>Eur J Plant Pathol</i> 117: 129-40.                                                                                                         |
| 10. | Wheat | Barley                                                             | Fusarium head blight       | USA                             | Univ of Minnesota: Dept of Agron & Plant Genet, Dept of Plant Pathol                                                                                                                                                                          | Shin SY, Mackintosh CA, Lewis J et al. 2008. Transgenic wheat expressing a barley class II chitinase gene has enhanced resistance against <i>Fusarium graminearum</i> . <i>J Exp Bot</i> 59(9): 2371-78.                                                                                                |
| 11. | Wheat | Bean                                                               | Fusarium head blight       | Italy                           | Sapienza Univ di Roma, Dip di Biologia e Biotecnologie<br>Charles Darwin<br>Univ degli Studi di Padova, Dip Territorio e Sistemi Agro-Forestali, sez. Patologia Vegetale<br>Univ degli Studi della Toscana, Dip di Agrobiologia e Agrochimica | Ferrari S, Sella L, Janni M et al. 2012. Transgenic expression of polygalacturonase-inhibiting proteins in <i>Arabidopsis</i> and wheat increases resistance to the flower pathogen <i>Fusarium graminearum</i> . <i>Plant Biol (Stuttg)</i> 14(s1):31-38.                                              |

|     |       |                                        |                                                     |                  |                                                                                                                                                                                                                            |                                                                                                                                                                                                                                                                                                                                                                                             |
|-----|-------|----------------------------------------|-----------------------------------------------------|------------------|----------------------------------------------------------------------------------------------------------------------------------------------------------------------------------------------------------------------------|---------------------------------------------------------------------------------------------------------------------------------------------------------------------------------------------------------------------------------------------------------------------------------------------------------------------------------------------------------------------------------------------|
| 12. | Wheat | Bovine                                 | Fusarium head blight + other pathogenes             | USA              | Univ Nebraska-Lincoln, Dept of Plant Pathol<br>USDA-ARS, Sustainable Agric Systems Lab<br>Univ of Nebraska Lincoln, Dept of Agron & Horticult                                                                              | Han JG, Lakshman DK, Galvez LC et al. 2012. Transgenic expression of lactoferrin imparts enhanced resistance to head blight of wheat caused by <i>Fusarium graminearum</i> . BMC Plant Biol 12: 33.<br><br>Lakshman DK, Natarajan S, Mandal S, Mitra A. 2013. Lactoferrin-derived resistance against plant pathogens in transgenic plants. J Agric Food Chem 61(48): 11730-35. <sup>i</sup> |
| 13. | Wheat | Chicken + <i>Aspergillus giganteus</i> | Fusarium head blight                                | China<br>Germany | Huazhong Agric Univ: Coll Life Sci & Technol, Mol Biotechnol Lab Triticeae Crops; Coll Plant Sci & Technol, China<br>RWTH Aachen, Inst Mol Biotechnol, Germany                                                             | Li HP, Zhang JB, Shi RP et al. 2008. Engineering Fusarium head blight resistance in wheat by expression of a fusion protein containing a <i>Fusarium</i> -specific antibody and an antifungal peptide. Mol Plant Microbe Interact 21(9): 1242-48.                                                                                                                                           |
| 14. | Wheat | Wheat + Barley                         | Fusarium head blight                                | USA              | Univ Minnesota: Dept Agron & Plant Genet; Dept Plant Pathol<br>Utah State Univ, Dept Biol<br>Michigan State Univ, Dept Crop & Soil Sci                                                                                     | Mackintosh CA, Lewis J, Radmer LE et al. 2007. Overexpression of defense response genes in transgenic wheat enhances resistance to Fusarium head blight. Plant Cell Rep 26(4): 479-88.                                                                                                                                                                                                      |
| 15. | Wheat | Wheat                                  | Fusarium head blight                                | Italy<br>France  | Ia Univ Tuscia, Natura & l'Energia, (DAFNE), Dept Sci & Tecnologie per l'Agricoltura, le Foreste, Italy<br>Univ degli studi Padova, Agripolis, Dept TeSAF, Italy<br>Univ d'Aix-Marseille, ISM2/BioSci UMR CNRS7313, France | Moscetti I, Tundo S, Janni M et al. 2013. Constitutive expression of the xylanase inhibitor TAXI-III delays Fusarium head blight symptoms in durum wheat transgenic plants. Mol Plant Microbe Interact 26(12): 1464-72.                                                                                                                                                                     |
| 16. | Wheat | <i>Actinidia chinensis</i>             | Fusarium head blight                                | Italy            | Univ Tuscia, Dep Agrobiol & Agrochem<br>Univ Rome "Sapienza", Dept Biol & Biotechnol "Charles Darwin"<br>Univ Padua, Dept Land, Environ, Agric & Forestry                                                                  | Volpi C, Janni M, Lionetti V et al. 2011. The ectopic expression of a pectin methyl esterase inhibitor increases pectin methyl esterification and limits fungal diseases in wheat. Mol Plant Microbe Interact 24 (9): 1012-19.                                                                                                                                                              |
| 17. | Wheat | <i>Gastrodia</i>                       | Fusarium head blight + Sharp eyespot                | China            | Jiangsu Acad Agric Sci, Provincial Key Lab for Agrobiol<br>Chinese Acad Agric Sci (CAAS), Inst of Crop Sci, Key Lab of Crop Genet & Breed of the Agr Minist, Natl Key Facility for Crop Gene Resour & Genetic Improv       | Zhou MP, Yang XM, Yao JB et al. 2012. Enhancement of resistance to Fusarium head blight and sharp eyespot in <i>Gastrodianin</i> transgenic wheat. Acta Agron Sin 38(9): 1617-24.                                                                                                                                                                                                           |
| 18. | Wheat | Radish                                 | Fusarium head blight + Sharp eyespot                | China            | CAAS, Key Lab of Crop Genet & Breed, Natl Key Facility for Crop Gene Resour & Genetic Improv<br>Shandong Agric Univ, Agron Coll<br>Jiangsu Acad Agric Sci, Biotechnol Inst                                                 | Li Z, Zhou MP, Zhang ZY et al. 2011. Expression of a radish defensin in transgenic wheat confers increased resistance to <i>Fusarium graminearum</i> and <i>Rhizoctonia cerealis</i> . Funct Integr Genomics 11(1) : 63-70.                                                                                                                                                                 |
| 19. | Wheat | Wheat                                  | Fusarium head blight + Common root rot              | China            | CAAS, Inst of Crop Sci, Key Lab of Crop Genet & Breed of the Agr Minist, Natl Key Facility for Crop Gene Resour & Genetic Improv<br>Jiangsu Acad Agric Sci                                                                 | Zhu XL, Li Z, Xu HJ et al. 2012. Overexpression of wheat lipid transfer protein gene <i>TaLTP5</i> increases resistances to <i>Cochliobolus sativus</i> and <i>Fusarium graminearum</i> in transgenic wheat. Funct Integr Genomics 12(3): 481-88.                                                                                                                                           |
| 20. | Wheat | Wheat + Barley                         | Fusarium head blight + Powdery mildew + Stripe rust | Switzerland      | Stn de recherche Agroscope Changins-Wadenswil                                                                                                                                                                              | Mascher F, Matasci C, Kneubuehler Y et al. 2012. The resistance of transgenic wheat lines against fungal infections in field trials. Agrarforschung Schweiz 3(6): 298-305.                                                                                                                                                                                                                  |

|     |        |                                |                                                                 |                                     |                                                                                                                                                                                                                                                                                  |                                                                                                                                                                                                                                                                |
|-----|--------|--------------------------------|-----------------------------------------------------------------|-------------------------------------|----------------------------------------------------------------------------------------------------------------------------------------------------------------------------------------------------------------------------------------------------------------------------------|----------------------------------------------------------------------------------------------------------------------------------------------------------------------------------------------------------------------------------------------------------------|
| 21. | Wheat  | Wheat                          | Powdery mildew                                                  | China                               | Nanjing Agric Univ, State Key Lab of Crop Genet & Germplasm Enhancement                                                                                                                                                                                                          | Wang HZ, Xing LP, Chen PD. 2007. Transformation of powdery mildew resistance-related genes of wheat. <i>Yi Chuan</i> (=Hereditas) 29(2): 243-49.                                                                                                               |
| 22. | Wheat  | Wheat                          | Powdery mildew                                                  | China                               | Nanjing Agric Univ, Natl Key Lab of Crop Genet & Germplasm Enhancement                                                                                                                                                                                                           | Xing LP, Wang HZ, Jiang ZN et al. 2008. Transformation of wheat thaumatin-like protein gene and diseases resistance analysis of the transgenic plants. <i>Acta Agron Sin</i> 34: 349-54.                                                                       |
| 23. | Wheat  | Wheat                          | Powdery mildew                                                  | Switzerland<br>France               | Univ Zürich, Inst Plant Biol, Switzerland<br>ETH Zürich, Dept Biol, Plant Biotechnol, Switzerland<br>INRA UMR 1095, Genet, Diversity & Ecophysiol Cereals, France<br>Agroscope Reckenholz-Tänikon Res Stn ART, Switzerland                                                       | Brunner S, Stirnweis D, Diaz Quijano C et al. 2012. Transgenic <i>Pm3</i> multilines of wheat show increased powdery mildew resistance in the field. <i>Plant Biotechnol J</i> 10(4): 398-409.                                                                 |
| 24. | Wheat  | <i>Thinopyrum intermedium</i>  | Take-all                                                        | China                               | CAAS, Natl Key Facil Crop Gene Resour & Genet Improv, Key Lab Biol & Genet Improv of Triticeae Crops, Agric Minist, Inst Crop Sci<br>Northwest A&F Univ, Coll Agron<br>Jiangsu Acad Agr Sci, Inst Biotechnol                                                                     | Liu X, Yang LH, Zhou XY et al. 2013. Transgenic wheat expressing <i>Thinopyrum intermedium</i> MYB transcription factor <i>TiMYB2R-1</i> shows enhanced resistance to the take-all disease. <i>J Exp Bot</i> 64(8): 2243-53.                                   |
| 25. | Wheat  | Potato                         | Take-all                                                        | China                               | CAAS, Natl Key Facil Crop Gene Resour & Genet Improv, Key Lab Biol & Genet Improv Triticeae Crops, Agric Minist, Inst Crop Sci<br>Cent South Univ, Forestry & Technol                                                                                                            | Rong W, Qi L, Wang JF, Du LP et al. 2013. Expression of a potato antimicrobial peptide SN1 increases resistance to take-all pathogen <i>Gaeumannomyces graminis</i> var. <i>tritici</i> in transgenic wheat. <i>Funct &amp; Integr Genomics</i> 13(3): 403-09. |
| 26. | Barley |                                | Rusts                                                           | Netherlands<br>Malaysia             | Univ Malaysia Sarawak, Dept Plant Sci & Environm Ecol, Fac Resour Sci & Technol, Malaysia<br>Leibniz Inst Plant Genet & Crop Plant Res (IPK), Plant Reproductive Biol, Germany<br>Wageningen Univ, Lab Plant Breed, Netherlands<br>INRA-AgroParisTech, UR1290 BIOGER-CPP, France | Yeo FK, Hensel G, Vozabova T et al. 2013. Golden susPtrit: a genetically well transformable barley line for studies on the resistance to rust fungi. <i>Theor Appl Gene</i> 127(2): 325-37.                                                                    |
| 27. | Barley | <i>Drosophila melanogaster</i> | Fusarium head blight +<br>Fusarium root rot +<br>Powdery mildew | Germany                             | Justus Liebig Univ, Inst Phytopathol & Applied Zoology, Res Ctr BioSystems, Land Use & Nutrition, Germany<br>Washington State Univ, Dept Crop & Soil Sci, USA                                                                                                                    | Rahnamaeian M, Langen G, Imani J et al. 2009. Insect peptide metchnikowin confers on barley a selective capacity for resistance to fungal ascomycetes pathogens. <i>J Exp Bot</i> 60(14): 4105-14.                                                             |
| 28. | Barley | <i>Drosophila melanogaster</i> | Powdery mildew                                                  | Iran                                | Shahid Bahonar Univ, Coll Agric, Dept of Plant Biotechnol                                                                                                                                                                                                                        | Rahnamaeian M, Vilcinskas A. 2012. Defense gene expression is potentiated in transgenic barley expressing antifungal peptide Metchnikowin throughout powdery mildew challenge. <i>J Plant Res</i> 125(1): 115-24.                                              |
| 29. | Barley | Wheat                          | Powdery mildew +<br>Barley leaf rust                            | Australia<br>Switzerland<br>Germany | CSIRO Plant Ind, Australia, Australia<br>Univ Zürich, Inst Plant Biol, Switzerland<br>Leibniz Inst, Plant Genet & Crop Plant Res IPK Gat, Germany                                                                                                                                | Risk JM, Selter LL, Chauhan H et al. 2013. The wheat <i>Lr34</i> gene provides resistance against multiple fungal pathogens in barley. <i>Plant Biotechnol J</i> 11(7): 847-854.                                                                               |

|     |                  |                                                     |                                                 |                 |                                                                                                                                                                                                                                                                                                                  |                                                                                                                                                                                                                                                                                                                                                                                                                                    |
|-----|------------------|-----------------------------------------------------|-------------------------------------------------|-----------------|------------------------------------------------------------------------------------------------------------------------------------------------------------------------------------------------------------------------------------------------------------------------------------------------------------------|------------------------------------------------------------------------------------------------------------------------------------------------------------------------------------------------------------------------------------------------------------------------------------------------------------------------------------------------------------------------------------------------------------------------------------|
| 30. | Maize            | Totivirus                                           | Common smut                                     | USA             | Donald Danforth Plant Sci Ctr<br>Univ Georgia, Dept Plant Pathol                                                                                                                                                                                                                                                 | Allen A, Islamovic E, Kaur J et al. 2011. Transgenic maize plants expressing the totivirus antifungal protein, KP4, are highly resistant to corn smut. <i>Plant Biotechnol J</i> 9(8): 857-64.                                                                                                                                                                                                                                     |
| 31. | Maize            | Maize +<br>Wheat                                    | Fusarioses<br>Fall armyworm<br>Corn earworm     | USA             | USDA-ARS, Crop Bioprotect Res Unit, Natl Ctr<br>Agricultur Utilization Res                                                                                                                                                                                                                                       | Dowd PF, Johnson ET, Price NP. 2012. Enhanced pest resistance of maize leaves expressing monocot crop plant-derived ribosome-inactivating protein and agglutinin. <i>J Agric Food Chem</i> 60(43): 10768-75.                                                                                                                                                                                                                       |
| 32. | Maize            | <i>Bacillus thuringiensis</i>                       | Corn earworm                                    | China           | China Agricul Univ, Coll Agric & Biotechnol<br>CAAS: Inst Crop Sci; Inst Plant Protection, State Key Lab<br>Biol Plant Dis & Insect Pests                                                                                                                                                                        | Zhang YW, Liu YJ, Ren Y et al. 2013. Overexpression of a novel <i>Cry1Ie</i> gene confers resistance to Cry1Ac-resistant cotton bollworm in transgenic lines of maize. <i>Plant Cell Tiss Organ Cult</i> 15(2): 151-58.                                                                                                                                                                                                            |
| 33. | OSR              | Sweet potato +<br><i>Paecilomyces<br/>javanicus</i> | Sclerotinia +<br><i>Plutella<br/>xylostella</i> | China           | Jiading Agro-tech Extens Ctr Shanghai Municipal<br>Zhejiang Univ, Dept of Agron                                                                                                                                                                                                                                  | Liu HB, Guo X, Naeem MS et al. 2011. Transgenic <i>Brassica napus</i> L. lines carrying a two gene construct demonstrate enhanced resistance against <i>Plutella xylostella</i> and <i>Sclerotinia sclerotiorum</i> . <i>Plant Cell Tiss Organ Cult</i> 106(1): 143-51.                                                                                                                                                            |
| 34. | OSR              | <i>Xanthomonas oryzae<br/>pv. oryzicola</i>         | Sclerotinia                                     | China           | Nanjing Agric Univ, Min Agric, Key Lab Monitoring &<br>Management of Plant Dis & Insect                                                                                                                                                                                                                          | Ma LL, Huo R, Gao XW et al. 2008. Transgenic rape with <i>hrf2</i> gene encoding harpin <sub>Xooc</sub> resistant to <i>Sclerotinia sclerotiorum</i> . <i>Agr Sci China</i> 7(4): 455-61.<br><br>Huo R, Wang Y, Ma LL et al. 2010. Assessment of inheritance pattern and agronomic performance of transgenic rapeseed having harpin <sub>Xooc</sub> -encoding <i>hrf2</i> gene. <i>Transgenic Res</i> 19(5): 841-47. <sup>ii</sup> |
| 35. | OSR              | Wheat                                               | Sclerotinia                                     | China           | SAAS (Sichuan Acad Agric Sci), Inst of Plant Protect                                                                                                                                                                                                                                                             | Liu Y, Ke SY. 2007. Transfer of oxalate oxidase gene into double-low <i>Brassica napus</i> by <i>Agrobacterium</i> -mediated transformation. <i>Southwest China J Agric Sci</i> 20(6): 1176-79.                                                                                                                                                                                                                                    |
| 36. | OSR              | <i>Oryza sativa</i> cv.<br>IAPAR 9                  | Sclerotinia                                     | China<br>Russia | Yangzhou Univ , Jiangsu Provincial Key Lab of Crop<br>Genet & Physiol, China<br>Chinese Acad Sci (CAS), Inst of Genet & Develop<br>Biol, China<br>Russian Acad Sci, Siberian Branch, Inst of Mol & Cell<br>Biol, Russia                                                                                          | Fan Y, Du K, Gao Y et al. 2013. Transformation of <i>LTP</i> gene into <i>Brassica napus</i> to enhance its resistance to <i>Sclerotinia sclerotiorum</i> . <i>Russ J Genet</i> 49(4): 380-87.                                                                                                                                                                                                                                     |
| 37. | OSR              | <i>Leonurus japonicus</i>                           | Sclerotinia                                     | China           | Southwest Univ, School of Life Sci, Minist Educ, State<br>Key Lab of Eco-Environ & Bio-Resour of Three Gorges<br>Reservoir Region, Key Lab of Eco-Envirns of Three<br>Gorges Reservoir Region<br>Southwest Univ , Biotechnol Res Ctr, Key Lab of<br>Biotechnol & Crop Quality Improv of Minist Agric of<br>China | Jiang Y, Fu X, Wen M et al. 2013. Overexpression of an nsLTPs-like antimicrobial protein gene ( <i>LJAMP2</i> ) from motherwort ( <i>Leonurus japonicus</i> ) enhances resistance to <i>Sclerotinia sclerotiorum</i> in oilseed rape ( <i>Brassica napus</i> ). <i>Physiol Mol Plant P</i> 82: 81-87.                                                                                                                              |
| 38. | OSR              | OSR cv Xiangyou15                                   | Sclerotinia                                     | China           | The Oil Crops Institute/National Oil Crops Improvement<br>Center, Changsha, 410128, Hunan, China                                                                                                                                                                                                                 | HuangFu HY, Guan CY, Jin FR, Yin CF (2014). Prokaryotic expression and protein function of <i>Brassica napus</i> PGIP2 and its genetic transformation. <i>Plant Biotechnology Reports</i> 8 (2): 171-181                                                                                                                                                                                                                           |
| 39. | OSR<br>Sunflower | <i>Macadamia<br/>integrifolia</i>                   | Sclerotinia +<br>Blackleg                       | Iran<br>Russia  | Cotton Res Inst Iran, Iran<br>Russian State Agrarian Univ – MTTA, Dept of Agric<br>Biotechnol, Russia                                                                                                                                                                                                            | Ghasemi BK, Sheveloukha VS, Karlov GI. 2008. Design, construction and cloning of pCambia-MiAMP1 vector for enhancing disease resistance in plants using <i>Agrobacterium</i> -mediated transformation. <i>J</i>                                                                                                                                                                                                                    |



|     |                   |                                                        |                                |                             |                                                                                                                                                                                                                                                                                                 |                                                                                                                                                                                                                                                                                                                                                          |
|-----|-------------------|--------------------------------------------------------|--------------------------------|-----------------------------|-------------------------------------------------------------------------------------------------------------------------------------------------------------------------------------------------------------------------------------------------------------------------------------------------|----------------------------------------------------------------------------------------------------------------------------------------------------------------------------------------------------------------------------------------------------------------------------------------------------------------------------------------------------------|
| 40. | OSR               | Barley                                                 | Clubroot                       | Germany                     | Schule Eschenweg<br>Julius Kühn Inst (JKI)- Federal Res Ctr for Cultivated Plants: Inst for Biosafety in GMP; Inst for Breed Res on Horticultur & Fruit Crops; Inst for Breed Res on Agric Crops                                                                                                | Reiss E, Schubert J, Scholze P et al. 2009. The barley thaumatin-like protein Hv-TLP8 enhances resistance of oilseed rape plants to <i>Plasmodiophora brassicae</i> . Plant Breeding 128(2): 210-12.                                                                                                                                                     |
| 41. | Grapevine         |                                                        | Downy mildew<br>Powdery mildew | Australia<br>France<br>USA  | CSIRO Plant Ind, Australia<br>Montpellier SupAgro, UMR AGAP, France<br>INRA: UMR1131 Sante Vigne & Qualite Vin; URGV; UMR AGAP, France<br>Univ Strasbourg, Sante Vigne & Qualite Vin UMR1131, France<br>USDA-ARS, Grape Genet Res Unit, USA<br>Cornell Univ, Dept Horticul, NY Agricul Stn, USA | Feechan A, Anderson C, Torregrosa L et al. 2013. Genetic dissection of a TIR-NB-LRR locus from the wild North American grapevine species <i>Muscadinia rotundifolia</i> identifies paralogous genes conferring resistance to major fungal and oomycete pathogens in cultivated grapevine. Plant J 76(4): 661-74<br><b>(also in mutagenesis section).</b> |
| 42. | Grapevine         | Inducible promoter from <i>Vitis pseudo-reticulata</i> | Powdery mildew                 | China                       | Min Agric, Key Lab Horticultur Plant Biol & Germplasm Utilization in Northwest China<br>Northwest A&F Univ: Coll of Horticul; Key Lab of Agric Mol Biol of Shaanxi Province                                                                                                                     | Xu WR, Yu YH, Ding JH et al. 2010. Characterization of a novel stilbene synthase promoter involved in pathogen- and stress-inducible expression from Chinese wild <i>Vitis pseudoreticulata</i> . Planta 231(2): 475-87.                                                                                                                                 |
| 43. | Grapevine         |                                                        | Grapevine fanleaf virus        | Italy<br>Austria            | Plant Virol Inst CNR IVV, Grugliasco Unit<br>Univ Torino, Dept Arboriculture & Pomol<br>Inst Appl Microbiol BOKU, Plant Biotechnol Unit, Vienna<br>AOU San Giovanni Battista, SCDU Med Genet, Turin<br>Plant Virol Inst CNR IVV, Grugliasco Unit                                                | Gambino G, Perrone I, Carra A et al. 2010. Transgene silencing in grapevines transformed with gflv resistance genes: Analysis of variable expression of transgene, sirnas production and cytosine methylation. Transgenic Res 19 (1): 17-27                                                                                                              |
| 44. | Grapevine         |                                                        | Grapevine fanleaf virus        | Tunisia<br>Germany          | CBBC, Lab Physiol Mol Vigne, Tunisia<br>RLP AgroSci GmbH, Inst Plant Res, Neustadt, Germany                                                                                                                                                                                                     | Jardak-Jamoussi R, Winterhagen P, Bouamama B et al. 2009. Development and evaluation of a gflv inverted repeat construct for genetic transformation of grapevine. Plant Cell Tissue and Organ Culture 97 (2): 187-196                                                                                                                                    |
| 45. | Potato            | Potato                                                 | Late blight                    | China                       | CAAS, Inst of Vegetables & Flowers<br>Inner Mongolia Univ of Sci & Technol, School of Mathematics, Physics & Biologic Engineer                                                                                                                                                                  | Xin CH, Guo JB, Huang SW, Qu DY 2011. Optimization of genetic transformation system for potato variety ' Desiree' and obtainment of transgenic lines. China Vegetables 1(6): 15-21.                                                                                                                                                                      |
| 46. | Potato            | Potato                                                 | Late blight                    | Japan                       | Nagoya Univ, Grad Sch Bioagr Sci                                                                                                                                                                                                                                                                | Kobayashi M, Yoshioka M, Asai S et al. 2012. StCDPD5 confers resistance to late blight pathogen but increases susceptibility to early blight pathogen in potato via reactive oxygen species burst. New Phytol 196(1): 223-37.                                                                                                                            |
| 47. | Potato (+ tomato) | <i>Solanum venturii</i>                                | Late blight                    | UK<br>Netherlands<br>Poland | JIC, Sainsbury Lab, UK<br>Wageningen UR Plant Breed, Netherlands<br>Plant Breed & Acclimatization Inst, Res Ctr Młochów,                                                                                                                                                                        | Foster SJ, Park TH, Pel M et al. 2009. <i>Rpi-vnt1.1</i> , a <i>Tm-2</i> <sup>2</sup> homolog from <i>Solanum venturii</i> , confers resistance to potato late blight. Mol Plant Microbe Interact 22(5): 589-600.                                                                                                                                        |

|     |        |                                                               |                          |                      |                                                                                                                                                |                                                                                                                                                                                                                                                             |
|-----|--------|---------------------------------------------------------------|--------------------------|----------------------|------------------------------------------------------------------------------------------------------------------------------------------------|-------------------------------------------------------------------------------------------------------------------------------------------------------------------------------------------------------------------------------------------------------------|
|     |        |                                                               |                          |                      | Poland                                                                                                                                         |                                                                                                                                                                                                                                                             |
| 48. | Potato | <i>Solanum bulbocastanum</i>                                  | Late blight              | USA                  | Univ Wisconsin-Madison, Dept Horticulture                                                                                                      | Kramer LC, Choudoir MJ, Wielgus SM et al. 2009. Correlation between transcript abundance of the <i>RB</i> gene and the level of the RB-mediated late blight resistance in potato. Mol Plant Microbe Interact 22(4): 447-55.                                 |
|     |        |                                                               |                          | USA                  | Univ Minnesota, Dept Plant Pathol, USA                                                                                                         |                                                                                                                                                                                                                                                             |
|     |        |                                                               |                          | Italy                | Univ Naples “Federico II”, Dept Soil, Plant, Environ & Animal Production Sci, Italy                                                            | Bradeen JM, Iorizzo M, Molloy DS et al. 2009. Higher copy numbers of the potato <i>RB</i> transgene correspond to enhanced transcript and late blight resistance levels. Mol Plant Microbe Interact 22(4): 437-46.                                          |
|     |        |                                                               |                          |                      | Univ Wisconsin: Biotechnol Ctr; Dept Horticulture, USA                                                                                         |                                                                                                                                                                                                                                                             |
|     |        |                                                               |                          | USA                  | USDA-ARS, Dept Plant Pathol                                                                                                                    | Halterman DA, Kramer LC, Wielgus S, Jiang JM. 2008. Performance of transgenic potato containing the late blight resistance gene <i>RB</i> . Plant Dis 92(3): 339-43.                                                                                        |
|     |        |                                                               |                          |                      | Univ Wisconsin-Madison, Dept Horticul                                                                                                          |                                                                                                                                                                                                                                                             |
|     |        |                                                               |                          | Ireland              | TEAGASC (Agric & Food Develop authority Ireland),                                                                                              | Wendt T, Doohan F, Mullins E. 2012. Production of <i>Phytophthora infestans</i> -resistant potato ( <i>Solanum tuberosum</i> ) utilising <i>Ensifer adhaerens</i> OV14. Transgenic Res 21(3): 567-78.                                                       |
|     |        |                                                               |                          | Denmark              | Crops Res Ctr, Dept of Crop Sci, Ireland                                                                                                       |                                                                                                                                                                                                                                                             |
|     |        |                                                               |                          |                      | Univ Coll Dublin, Shool Biol & Environ Sci, Ireland                                                                                            |                                                                                                                                                                                                                                                             |
|     |        |                                                               |                          |                      | Aarhus Univ, Fac of Agric Sci, Dept Genet & Biotechnol, Denmark                                                                                |                                                                                                                                                                                                                                                             |
| 49. | Potato | Potato                                                        | Late blight              | China                | Minist Educ, Huazhong Agric Univ, Key Lab Horticultur Plant BiolDis                                                                            | Ni XM, Tian ZD, Liu J et al. 2010. Cloning and molecular characterization of the potato RING finger protein gene <i>StRFP1</i> and its function in potato broad-spectrum resistance against <i>Phytophthora infestans</i> . J Plant Physiol 167(6): 488-96. |
|     |        |                                                               |                          |                      | Natl Ctr for Vegetable Improv, Potato Engineer & Technol Res Ctr of Hubei Province                                                             |                                                                                                                                                                                                                                                             |
| 50. | Potato | Potato                                                        | Late blight              | Netherlands, China   | Univ Wageningen & Res Ctr, Wacheningen UR Plant Breed, Netherlands                                                                             | Zhu SX, Li Y, Vossen JH et al. 2012. Functional stacking of three resistance genes against <i>Phytophthora infestans</i> in potato. Transgenic Res 21(1): 89-99.                                                                                            |
|     |        |                                                               |                          |                      | Acad Agric Sci, Inst Vegetables & Flowers, China                                                                                               | Zhu SX., Duwa, A., Su Q et al. 2013. Vector integration in triple R gene transformants and the clustered inheritance of resistance against potato late blight. Transgenic Res 22(2): 315-25. <sup>iii</sup>                                                 |
| 51. | Potato | Synthesized analog of peptide from <i>Galleria mellonella</i> | Late blight              | Czech Republic       | ASCR: Biol Ctr, Inst Entomol; Inst Experim Botany                                                                                              | Kodrik D, Kludkiewicz B, Navratil O et al. 2013. Protease inhibitor from insect silk-activities of derivatives expressed in vitro and in transgenic potato. Appl Biochem Biotechnol 171(1): 209-24.                                                         |
|     |        |                                                               |                          |                      | Potato Res Inst Ltd.                                                                                                                           |                                                                                                                                                                                                                                                             |
|     |        |                                                               |                          |                      | Univ South Bohemia, Fac Sci                                                                                                                    |                                                                                                                                                                                                                                                             |
| 52. | Potato | Synthetic peptide                                             | Late blight<br>White rot | Russia               | Russian Acad Sci, Shemyakin-Ovchinnikov Inst Bioorganic Chem (Pushchino Branch)                                                                | Zakharchenko NS, Rukavtsova EB, Gudkov AT et al. 2007. Expression of the artificial gene encoding anti-microbial peptide Cecropin P1 increases the resistance of transgenic potato plants to potato blight and white rot. Dokl Biol Sci 415: 267-69.        |
| 53. | Potato |                                                               | Late blight              | China<br>Netherlands | Shandong Acad Agricul Sci, Key Lab Crop Genetic Improv & Biotechnol, China                                                                     | Li G, Huang S, Guo X et al. 2011. Cloning and characterization of <i>R3b</i> ; members of the <i>R3</i> superfamily of late blight resistance genes show sequence and functional divergence. Mol Plant Microbe Interact 24(10): 1132-42.                    |
|     |        |                                                               |                          |                      | Wageningen UR Plant Breed,Netherlands                                                                                                          |                                                                                                                                                                                                                                                             |
|     |        |                                                               |                          |                      | Key Lab Horticul Crops Genet Improv Minist Agric, Sino-Dutch Joint CAAS , Inst Vegetables & Flowers, Lab of Horticultural Genom Technol, China | (also in other transient assay section)                                                                                                                                                                                                                     |

|     |        |                                                                                                 |                                                                  |                    |                                                                                                                                                                                                  |                                                                                                                                                                                                                                                                             |
|-----|--------|-------------------------------------------------------------------------------------------------|------------------------------------------------------------------|--------------------|--------------------------------------------------------------------------------------------------------------------------------------------------------------------------------------------------|-----------------------------------------------------------------------------------------------------------------------------------------------------------------------------------------------------------------------------------------------------------------------------|
|     |        |                                                                                                 |                                                                  |                    | Huazhong Agric Univ, Minist Educ, Coll Horticul & Forestry, Dept Vegetable Crops, Key Lab Horticul Biol, China                                                                                   |                                                                                                                                                                                                                                                                             |
| 54. | Potato | <i>Nicotiana tabacum</i> + <i>Phyllomedusa sauvagii</i> + <i>Gallus gallus</i>                  | Late blight + <i>Rhizoctonia solani</i> + <i>Fusarium solani</i> | Argentina          | Univ Buenos Aires, Fac Ciencias Exactas & Naturales: Dept Fisiol, Biol Mol & Celular, Lab Agrobiotecnol; Dept Biodiversidad & Biol Experim, Lab Sistemática Plantas Vasculares<br>INGEBI-CONICET | Rivero M, Furman N, Mencacci N et al. 2012. Stacking of antimicrobial genes in potato transgenic plants confers increased resistance to bacterial and fungal pathogens. J Biotechnol 157(2): 334-43.                                                                        |
| 55. | Potato | <i>Camellia sinensis</i>                                                                        | Late blight + <i>Macrophomina phaseolina</i>                     | India              | CSIR-Inst Himalayan Bioresour Technol: Division Biotechnol; Hill Area Tea Sci Division                                                                                                           | Acharya K, Pal AK, Gulati A et al. 2013. Overexpression of <i>Camellia sinensis</i> thaumatin-like protein, <i>CsTLP</i> in potato confers enhanced resistance to <i>Macrophomina phaseolina</i> and <i>Phytophthora infestans</i> infection. Mol Biotechnol 54(2): 609-22. |
| 56. | Potato | Synthesized analog of peptide from <i>Xenopus laevis</i>                                        | Late blight + <i>Ralstonia solanacearum</i>                      | China              | Nanjing Agric Univ, Coll Life Sci                                                                                                                                                                | Hong YB, Liu SP, Zhu YP et al. 2013. Expression of the <i>MSI-99m</i> gene in transgenic potato plants confers resistance to <i>Phytophthora infestans</i> and <i>Ralstonia solanacearum</i> . Plant Mol Biol Rep 31(2): 418-24.                                            |
| 57. | Potato | Synthetic hybrid molecules based on cecropin A (giant silk moth) and melittin (melliferous bee) | Late blight + Early blight + <i>Erwinia carotovora</i>           | Belarus            | Natl Acad Sci Belarus, Inst Biophysics & Celle Engineer                                                                                                                                          | Vutto NL, Gapeeva TA, Pundik AN et al. 2010. Transgenic Belarussian-bred potato plants expressing genes for antimicrobial peptides of the cecropin-melittin type. Russ J Genet (2010) 46: 1433-39.                                                                          |
| 58. | Potato | <i>Serratia plymuthica</i>                                                                      | Early blight + <i>Fusarium oxysporum</i>                         | Belarus            | Nat Acad Sci Belarus: Inst Genet & Cytol; Sci Res Ctr Potato & Vegetable Grow                                                                                                                    | Shakhbazov AV, Iakovleva GA, Rod'kina IA, Kartel NA. 2008. Pleiotropic effects of chitinase gene from <i>Serratia plymuthica</i> in transgenic potato. Tsitol Genet 42(2): 3-9.                                                                                             |
| 59. | Potato | <i>Amaranthus caudatus</i>                                                                      | Green peach aphid                                                | China              | CAS, State Key Lab Plant Genom, Inst Microbiol                                                                                                                                                   | Yang X, Zhang XR, Zhang MJ et al. 2011. Transgenic potato overexpressing the <i>Amaranthus caudatus</i> agglutinin gene to confer aphid resistance. Crop Sci 51(5): 2119-24.                                                                                                |
| 60. | Potato | <i>Galanthus nivalis</i>                                                                        | Green peach aphid                                                | Norway             | Norwegian Univ Life Sci, Dept Ecol & Nat Resour Management                                                                                                                                       | Aasen SS, Hagvar EB. 2012. Effect of potato plants expressing snowdrop lectin (GNA) on the performance and colonization behaviour of the peach-potato aphid <i>Myzus persicae</i> . Acta Agr Scand Section B-Soil and Plant Science 62(4): 352-61.                          |
| 61. | Potato | <i>Bacillus thuringiensis</i>                                                                   | Colorado potato beetle                                           | China              | CAS, Inst Microbiol, State Key Lab Plant Genom<br>Gansu Acad Agric Sci, Inst Plant Protect<br>Acad Agric Sci Xinjiang Uygur Autonomous Reg, Inst Plant Protect                                   | Zhou ZX, Pang JH, Guo WC et al. 2012. Evaluation of the resistance of transgenic potato plants expressing various levels of Cry3A against the Colorado potato beetle ( <i>Leptinotarsa decemlineata</i> Say) in the laboratory and field. Pest Manag Sci 68(12): 1595-604.  |
| 62. | Potato | <i>Bacillus thuringiensis</i>                                                                   | Colorado potato beetle                                           | USA                | Michigan State Univ, Dept Crop & Soil Sci, E Lansing                                                                                                                                             | Cooper SG, Douches DS, Coombs JJ, Grafius EJ. 2007. Evaluation of natural and engineered resistance mechanisms in potato against Colorado potato beetle in a no-choice field study. J Econ Entomol 100(2): 573-79.                                                          |
| 63. | Potato | <i>Bacillus thuringiensis</i>                                                                   | Colorado potato beetle                                           | Bulgaria<br>Poland | AgroBioInst, Bulgaria<br>Potato Lab, Bulgaria                                                                                                                                                    | Kamenova I, Batchvarova R, Flasiński S et al. 2008. Transgenic resistance of Bulgarian potato cultivars to the Colorado potato beetle                                                                                                                                       |

|     |                      |                                                          |                            |                                                                                                                                         |                                                                                                                                                                                                                                                                                                                       |
|-----|----------------------|----------------------------------------------------------|----------------------------|-----------------------------------------------------------------------------------------------------------------------------------------|-----------------------------------------------------------------------------------------------------------------------------------------------------------------------------------------------------------------------------------------------------------------------------------------------------------------------|
|     |                      |                                                          | USA                        | Bulgarian Acad Sci, Inst Zool, Bulgaria<br>Adam Mickiewicz Univ Poznan, Poland<br>Monsanto Co, USA<br>Russian Acad Sci, Ctr Bioengineer | based on Bt technology. Agron Sustain Dev 28(4): 481-88.                                                                                                                                                                                                                                                              |
| 64. | Potato               | <i>Bacillus thuringiensis</i>                            | Colorado potato beetle     | Russia                                                                                                                                  | Skryabin K. 2010. Do Russia and Eastern Europe need GM plants? N Biotechnol 27(5): 593-95.                                                                                                                                                                                                                            |
| 65. | Potato               | synthetic chemodisruptive peptide                        | Golden nematode            | UK                                                                                                                                      | Univ Leeds, Ctr Plant Sci<br>Lilley CJ, Wang D, Atkinson HJ, Urwin PE. 2011. Effective delivery of a nematode-repellent peptide using a root-cap-specific promoter. Plant Biotechnol J 9 (2): 151-161                                                                                                                 |
| 66. | Potato               | synthetic chemodisruptive peptide + Proteinase inhibitor | Golden nematode            | UK                                                                                                                                      | Univ Leeds, Ctr Plant Sci<br>Green J, Wang D, Lilley CJ et al. 2012. Transgenic potatoes for potato cyst nematode control can replace pesticide use without impact on soil quality. Plos One 7(2): e30973.                                                                                                            |
| 67. | Potato               | Potato                                                   | Potato virus Y (PVY)       | South Korea                                                                                                                             | Chosun Univ: Dept Biotechnol; BK21 Res Team Protein Activity Control<br>Lee C, Park J, Hwang I et al. 2010. Expression of G-ry derived from the potato ( <i>Solanum tuberosum</i> L.) increases PVY(O) resistance. J Agric Food Chem 58(12): 7245-51.                                                                 |
| 68. | Potato               | Wild potato                                              | PVY                        | USA                                                                                                                                     | JR Simplot Company, Simplot Plant Sci<br>Duan H, Michael C, Rommens C M. 2012. Overexpression of the wild potato <i>elf4E-1</i> variant <i>Eva1</i> elicits Potato virus Y resistance in plants silenced for native <i>elf4E-1</i> . Transgenic Res 21(5): 929-38.                                                    |
| 69. | Potato + other crops | -                                                        | Insect + nematods + Fungi  | Russia                                                                                                                                  | Russian Acad Sci, Bach Inst Biochem<br>Mosolov VV, Valueva TA. 2008. Proteinase inhibitors in plant biotechnology: A review. Appl Biochem Micro+ 44(3): 233-40.                                                                                                                                                       |
| 70. | Beet                 | <i>Pseudomonas syringae</i> pv. <i>phaseolicola</i>      | Rhizomania disease (BNYVV) | Greece                                                                                                                                  | Univ Agric: Dept Crop Sci; Dept Agricul Biotechnol<br>Pavli OI, Kelaidi GI, Tampakaki AP, Skaracis GN. 2011. The <i>hrpZ</i> gene of <i>Pseudomonas syringae</i> pv. <i>phaseolicola</i> enhances resistance to rhizomania disease in transgenic <i>Nicotiana benthamiana</i> and sugar beet. Plos One 6 (3): e17306. |

## Supplementary Material 4b: Cisgenesis

|    | Plant  | Disease/Pest | Country     | University or Lab                                    | References                                                                                                                                                                                                                                 |
|----|--------|--------------|-------------|------------------------------------------------------|--------------------------------------------------------------------------------------------------------------------------------------------------------------------------------------------------------------------------------------------|
| 1. | Potato | Late blight  | Netherlands | Univ Wageningen & Res Ctr, Lab of Plant Breed        | Park TH, Vleeshouwers V, Jacobsen E et al. 2009. Molecular breeding for resistance to <i>Phytophthora infestans</i> (Mont.) de Bary in potato ( <i>Solanum tuberosum</i> L.): a perspective of cisgenesis. Plant Breeding 128(2): 109-117. |
| 2. | Potato | Late blight  | Netherlands | Louis Bolk Inst<br>Wageningen Univ, Crop & Weed Ecol | Lammerts van Bueren ETL, Tiemens-Hulscher M, Struik PC 2008. Cisgenesis does not solve the late blight problem of organic potato production: alternative breeding strategies. Potato Res 51(1): 89-99.                                     |
| 3. | Potato | Late blight  | Netherlands | Univ Wageningen & Res Ctr, Plant Breed               | Jacobsen E, Schouten HJ. 2009. Cisgenesis: an important sub-                                                                                                                                                                               |

### Supplementary Material 4c: RNAi /silencing (stable and transient assays)

| Plant    | Technique                                                                                                                                     | Pest / Disease | Country          | University or Lab                                                                                                                                                                                                  | References                                                                                                                                                                                                                                                                                                        |
|----------|-----------------------------------------------------------------------------------------------------------------------------------------------|----------------|------------------|--------------------------------------------------------------------------------------------------------------------------------------------------------------------------------------------------------------------|-------------------------------------------------------------------------------------------------------------------------------------------------------------------------------------------------------------------------------------------------------------------------------------------------------------------|
| 1. Wheat | Barley stripe mosaic virus (BSMV) as a transient expression system in planta. BSMV-based virus induced gene silencing (VIGS) of pathogen gene | Leaf rust      | Canada           | Agric & Agri-Food Canada: Pacific Agri-Food Res Ctr; Cereal Res Ctr                                                                                                                                                | Panwar V, McCallum B, Bakkeren G. 2013. Host-induced gene silencing of wheat leaf rust fungus <i>Puccinia triticina</i> pathogenicity genes mediated by the Barley stripe mosaic virus. Plant Mol Biol 81(6): 595-608.                                                                                            |
| 2. Wheat | BSMV-based VIGS of pathogen gene                                                                                                              | Stripe rust    | China<br>Germany | Northwest A&F Univ, State Key Lab of Crop Stress Biol for Arid Areas; Coll of Plant Protect; Coll of Plant Sci Univ Hohenheim, Fak Agrarwissenschaften, Inst für Phytomedizin, Fachgebiet Phytopathologie, Germany | Zhang H, Guo J, Voegele RT et al. 2012. Functional characterization of calcineurin homologs <i>PsCNA1/PsCNB1</i> in <i>Puccinia striiformis</i> f. sp. <i>tritici</i> using a host-induced RNAi system. PLoS ONE 7(11): e49262.                                                                                   |
| 3. Wheat | BSMV-based VIGS of pathogen gene                                                                                                              | Stripe rust    | USA              | Washington State Univ, Dept of Plant Pathol Univ of Northern Iowa, Dept of Biol                                                                                                                                    | Yin C, Jurgenson JE, Hulbert SH. 2011. Development of a host-induced RNAi system in the wheat stripe rust fungus <i>Puccinia striiformis</i> f. sp. <i>tritici</i> . Mol Plant Microbe Interact 24(5): 554-61.                                                                                                    |
| 4. Wheat | BSMV-based VIGS of plant gene (- effect on plant resistance)                                                                                  | Stripe rust    | China            | Northwest A&F Uni: State Key Lab Crop Stress Biol Arid Areas; Coll Agron; Coll Plant Protect                                                                                                                       | Zhang H, Hu YG, Yang BJ et al. 2013. Isolation and characterization of a wheat IF2 homolog required for innate immunity to stripe rust. Plant Cell Reports 32(5): 591-600.                                                                                                                                        |
| 5. Wheat | BSMV-based VIGS of plant gene (- effect)                                                                                                      | Stripe rust    | China            | Northwest A&F Univ: State Key Lab Crop Stress Biol Arid Areas; Coll Life Sci; Coll Plant Protect                                                                                                                   | Duan Y, Guo J, Shi X et al. 2013. Wheat hypersensitive-induced reaction genes TaHIR1 and TaHIR3 are involved in response to stripe rust fungus infection and abiotic stresses. Plant Cell Rep 32(2): 273-83.                                                                                                      |
| 6. Wheat | BSMV-based VIGS of plant gene (+ effect)                                                                                                      | Stripe rust    | China            | Northwest A&F Univ: State Key Lab Crop Stress Biol Arid Areas; Coll Plant Protect; Coll Life Sci                                                                                                                   | Feng H, Zhang Q, Li HY et al. 2013. vsiRNAs derived from the miRNA-generating sites of pri-tae-miR159a based on the BSMV system play positive roles in the wheat response to <i>Puccinia striiformis</i> f. sp. <i>tritici</i> through the regulation of <i>taMyb3</i> expression. Plant Physiol Bioch 68: 90-95. |
| 7. Wheat | BSMV-based VIGS of host gene (- effect)                                                                                                       | Stripe rust    | China            | Northwest A&F Univ: State Key Lab Crop Stress Biol Arid Areas; Coll Plant Protect, Coll Life Sci                                                                                                                   | Feng H, Zhang Q, Wang QL et al. 2013. Target of tae-miR408, a chemoanin-like protein gene ( <i>TaCLP1</i> ), plays positive roles in wheat response to high-salinity, heavy cupric stress and stripe rust. Plant Mol Biol 83(4-5): 433-43.                                                                        |
| 8. Wheat | BSMV-based VIGS of plant gene (+ effect)                                                                                                      | Stripe rust    | China            | Northwest A&F Univ: State Key Lab Crop Stress Biol Arid Areas; Coll Life Sci; Coll Plant Protect                                                                                                                   | Duan XY, Wang XJ, Fu YP et al. 2013. <i>Taeil1</i> , a wheat homologue of <i>AtEIN3</i> , acts as a negative regulator in the wheat-stripe rust fungus                                                                                                                                                            |

interaction. Mol Plant Pathol 14(7): 728-39.

|     |                 |                                                                                                                          |                                        |               |                                                                                                                                                                              |                                                                                                                                                                                                                                                                                                                                                                        |
|-----|-----------------|--------------------------------------------------------------------------------------------------------------------------|----------------------------------------|---------------|------------------------------------------------------------------------------------------------------------------------------------------------------------------------------|------------------------------------------------------------------------------------------------------------------------------------------------------------------------------------------------------------------------------------------------------------------------------------------------------------------------------------------------------------------------|
| 9.  | Wheat           | BSMV-based VIGS of plant gene (+ effect)                                                                                 | Stripe rust                            | China         | Northwest A&F Univ: State Key Lab Crop Stress Biol Arid Areas; Coll Plant Protect                                                                                            | Guo J, Bai PF, Yang Q et al. 2013. Wheat zinc finger protein TaLSD1, a negative regulator of programmed cell death, is involved in wheat resistance against stripe rust fungus. Plant Physiol Bioch 71: 164-72.                                                                                                                                                        |
| 10. | Wheat           | BSMV-based VIGS of plant gene (- effect)                                                                                 | Stripe rust                            | China         | Northwest A&F Univ: State Key Lab Crop Stress Biol Arid Areas; Coll Plant Protect                                                                                            | Yang Y, Zhao J, Liu P et al. 2013. Glycerol-3-phosphate metabolism in wheat contributes to systemic acquired resistance against <i>Puccinia striiformis</i> f. sp. <i>tritici</i> . PLoS ONE 8(11): e81756.                                                                                                                                                            |
| 11. | Wheat           | BSMV-based VIGS of plant gene (- effect)                                                                                 | Stripe rust                            | China         | CAAS: Inst Genet & Develop Biol, State Key Lab Plant Cell & Chromosome Engineer; Graduate School CAAS Northwest A&F Univ, Coll Plant Protect, Shaanxi Key Lab Mol Biol Agric | Wang GF, Wei X, Fan R et al. 2011. Molecular analysis of common wheat genes encoding three types of cytosolic heat shock protein 90 (Hsp90): Functional involvement of cytosolic Hsp90s in the control of wheat seedling growth and disease resistance. New Phytol 191(2): 418-31.                                                                                     |
| 12. | Wheat           | <i>Agrobacterium tumefaciens</i> (Agroinfiltration) Transient expression <i>in planta</i> for silencing of pathogen gene | Stripe rust<br>Leaf rust<br>Stem rust  | Canada        | Agric & Agri-Food Canada, Pacific Agri-Food Res Ctr                                                                                                                          | Panwar V, McCallum B, Bakkeren G. 2013. Endogenous silencing of <i>Puccinia triticina</i> pathogenicity genes through in planta-expressed sequences leads to the suppression of rust diseases on wheat. Plant J 73(3): 521-32.                                                                                                                                         |
| 13. | Wheat           | Particle bombardment transient expression                                                                                | Powdery mildew                         | Germany       | Max Planck Inst Züchtungsforsch, Dept Plant Microbe Interact                                                                                                                 | Panstruga R. (2004). A golden shot: How ballistic single cell transformation boosts the molecular analysis of cereal-mildew interactions. Mol Plant Pathol 5(2): 141-48. (Review)                                                                                                                                                                                      |
| 14. | Wheat           | Microprojectile bombardment transient expression for plant gene silencing (- effect on resistance)                       | Powdery mildew<br>other invading fungi | Canada        | Univ of Saskatchewan, Dept of Biol<br>Natl Res Counci of Canada, Plant Biotechnol Inst,                                                                                      | Bhuiyan NH, Selvaraj G, Wei YD, King J. 2009. Gene expression profiling and silencing reveal that monolignol biosynthesis plays a critical role in penetration defence in wheat against powdery mildew invasion. J Exp Bot 60(2): 509-21.<br><br>Bhuiyan NH, Selvaraj G, Wei YD, King J. 2009. Role of lignification in plant defense. Plan Signal Behav 4(2): 158-59. |
| 15. | Wheat<br>Barley | BSMV-based VIGS of pathogen gene                                                                                         | Powdery mildew                         | Germany<br>UK | The Leibniz Inst Plant Genet & Crop Plant Res, Germany<br>Scottish Crop Res Inst, UK<br>JIC, UK                                                                              | Nowara D, Gay A, Lacomme C et al. 2010. HIGS: Host induced gene silencing in the obligate biotrophic fungal pathogen <i>Blumeria graminis</i> . Plant Cell 22(9): 3130-41.                                                                                                                                                                                             |
| 16. | Wheat           | BSMV-based VIGS of the wheat <i>Mlo</i> gene                                                                             | Powdery mildew                         | Hungary       | Agricultural Biotechnology Center                                                                                                                                            | Várallyay É, Giczey G, Burgyán J. 2012. Virus-induced gene silencing of <i>Mlo</i> genes induces powdery mildew resistance in <i>Triticum aestivum</i> . Arch Virol 157: 1345-1350                                                                                                                                                                                     |
| 17. | Wheat           | Stable transgenics                                                                                                       | Hessian fly                            | USA           | Kansas State Univ: Dept Entomol, Dept Plant Pathol; Dept Biochem<br>USDA-ARS, Hard Winter Wheat Genet Res Unit<br>Montana State Univ, Dept Plant Sci & Plant Pathol          | Liu X, Khajuria C, Li J et al. 2013. Wheat <i>Mds-1</i> encodes a heat-shock protein and governs susceptibility towards the Hessian fly gall midge. Nat Commun 4: 2070.                                                                                                                                                                                                |

|     |        |                                                                         |                                       |                     |                                                                                                                                                                                                                                                                                         |                                                                                                                                                                                                                                                                                                                           |
|-----|--------|-------------------------------------------------------------------------|---------------------------------------|---------------------|-----------------------------------------------------------------------------------------------------------------------------------------------------------------------------------------------------------------------------------------------------------------------------------------|---------------------------------------------------------------------------------------------------------------------------------------------------------------------------------------------------------------------------------------------------------------------------------------------------------------------------|
| 18. | Wheat  | BSMV-based VIGS of plant gene (- effect on resistance)                  | Aphids                                | USA<br>South Africa | Colorado State Univ: Dept Soil & Crop Sci; Dept Bioagric Sci & Pest Management, USA<br>Stellenbosch Univ, Dept Genet, South Africa<br>Purdue Univ, Dept Agron, USA<br>USDA-ARS, Crop Production & Pest Control Res Unit, USA                                                            | Van Eck L, Schultz T, Leach JE et al. 2010. Virus-induced gene silencing of <i>WRKY53</i> and an inducible <i>phenylalanine ammonia-lyase</i> in wheat reduces aphid resistance. Plant Biotechnol J 8(9): 1023-32.                                                                                                        |
| 19. | Wheat  | Stable plant transgenics to alter pest gene expression                  | Grain aphid                           | China               | China Agricul Univ: State Key Lab Agro-Biotechnol; Coll Agric & Biotechnol                                                                                                                                                                                                              | Xu L, Duan X, Lv Y, Zhang X et al. 2014. Silencing of an aphid carboxylesterase gene by use of plant-mediated RNAi impairs <i>Sitobion avenae</i> tolerance of Phoxim insecticides. Transgenic Res 23(2) : 389-96.                                                                                                        |
| 20. | Wheat  | Stable transgenics                                                      | Barley yellow dwarf virus             | China               | CAAS, Inst Plant Protect, State Key Lab Biol Plant Dis & Insect Pests                                                                                                                                                                                                                   | Yan F, Zhang WW, Xiao H et al. 2007. Transgenic wheat expressing virus-derived hairpin RNA is resistant to barley yellow dwarf virus. Yi Chuan (=Hereditas) 29(1): 97-102.                                                                                                                                                |
| 21. | Barley | BSMV-based VIGS of plant gene (- effect on resistance)                  | Stem rust                             | USA<br>UK           | N Dakota State Univ, Dept Plant Pathol, USA<br>James Hutton Inst, UK<br>Washington State Univ, Dept Crop & Soil Sci, USA<br>Univ Minnesota, Dept Plant Pathol, USA                                                                                                                      | Wang X, Richards J, Gross T et al. 2013. The <i>rpg4</i> -mediated resistance to wheat stem rust ( <i>Puccinia graminis</i> ) in barley ( <i>Hordeum vulgare</i> ) requires <i>Rpg5</i> , a second NBS-LRR gene, and an actin depolymerization factor. Mol Plant Microbe In 26(4): 407-18 ( <b>also in MAS section</b> ). |
| 22. | Barley | BSMV-based VIGS of plant gene ( + effect on resistance)                 | Stem rust                             | USA                 | Washington State Univ: Dept Crop & Soil Sci; School Mol Biosci; Dept Plant Pathol; USDA-ARS; Dept Plant Pathol<br>Univ Minnesota, Dept Plant Pathol                                                                                                                                     | Zhang L, Lavery L, Gill U et al. 2009. A cation/proton-exchanging protein is a candidate for the barley <i>Nec51</i> gene controlling necrosis and enhanced defense response to stem rust. Theor Appl Genet 118(2): 385-97 ( <b>also in MAS section</b> ).                                                                |
| 23. | Barley | n/a                                                                     | Stem rust                             | USA                 | North Dakota State Univ, Dept Plant Pathol                                                                                                                                                                                                                                              | Arora D, Gross T, Brueggeman R. 2013. Allele characterization of genes required for <i>rpg4</i> -mediated wheat stem rust resistance identifies <i>Rpg5</i> as the <i>R</i> gene. Phytopathology 103(11): 1153-61.                                                                                                        |
| 24. | Barley | Stable plant transgenics silencing pathogen gene                        | Fusarium head blight                  | Germany<br>France   | Justus Liebig Univ: Inst Phytopathol & Applied Zoology; Ctr Bio Systems, Land Use & Nutrition, Inst Microbiol & Mol Biol, Germany<br>Univ Nice-Sophia Antipolis, Inst Sophia Agrobiotech, Unité Mixte de Recherche 1355 Inst Natl Recherche Agronomique, Ctr Natl Recherche Sci, France | Koch A, Kumar N, Weber L et al. 2013. Host-induced gene silencing of cytochrome P450 lanosterol C14 $\alpha$ -demethylase-encoding genes confers strong resistance to <i>Fusarium</i> species. Proc Natl Acad Sci USA 110(48): 19324-329.                                                                                 |
| 25. | Barley | Stable transgenics silencing plant gene (+ effect)                      | Fusarium head blight + Powdery mildew | Germany<br>USA      | Justus Liebig Univ: Res Ctr BioSystems, Land Use & Nutrition; Dept Botany, Germany<br>Boyce Thompson Inst Plant Res, USA<br>Texas State Univ, Dept Biol, USA                                                                                                                            | Langen G, von Einem S, Koch A et al. 2014. The compromised recognition of Turnip crinkle virus 1 subfamily of morc ATPases regulates disease resistance in barley to biotrophic and necrotrophic pathogens. Plant Physiol 164(2): 866-78.                                                                                 |
| 26. | Barley | Transient (VIGS) and stable transgenics silencing plant gene (+ effect) | Powdery mildew                        | Germany<br>UK       | Technische Univ München, Lehrstuhl Phytopathol, Germany<br>SCRI , Plant Pathol, UK<br>SASA, Virology & Zoology section, UK<br>Inst Plant Genet & Crop Plant Res, Germany                                                                                                                | Eichmann R, Bischof M, Weis C et al. 2010. BAX INHIBITOR-1 is required for full susceptibility of barley to powdery mildew. Mol Plant Microbe Interact 23(9): 1217-27.                                                                                                                                                    |

|     |           |                                                                                         |                                       |                        |                                                                                                                                                                  |                                                                                                                                                                                                                                                                                                                                                                                     |
|-----|-----------|-----------------------------------------------------------------------------------------|---------------------------------------|------------------------|------------------------------------------------------------------------------------------------------------------------------------------------------------------|-------------------------------------------------------------------------------------------------------------------------------------------------------------------------------------------------------------------------------------------------------------------------------------------------------------------------------------------------------------------------------------|
| 27. | Barley    | Particle bombardment transient expression silencing plant genes (- or + effects)        | Powdery mildew                        | Germany<br>Netherlands | The Leibniz Inst Plant Genet & Crop Plant Res, Germany<br><br>WUR, Lab Plant Breed, Netherlands                                                                  | Douchkov D, Johrde A, Nowara D et al. 2011. Convergent evidence for a role of WIR1 proteins during the interaction of barley with the powdery mildew fungus <i>Blumeria graminis</i> . J Plant Physiol 168(1): 20-29 <b>(also in MAS section)</b> .                                                                                                                                 |
| 28. | Maize     | Direct feeding of ds-RNA or production in transgenic plant silencing insect gene        | Western corn rootworm                 | USA<br>Belgium         | Monsanto Co, USA<br><br>Devgen NV, Technologiepark, Belgium<br><br><br>Monsanto Co, USA                                                                          | Baum JA, Bogaert T, Clinton W et al. 2007. Control of coleopteran insect pests through RNA interference. Nat Biotechnol 25(11): 1322-26.<br><br>Bolognesi R, Ramaseshadri P, Anderson J et al. 2012. Characterizing the mechanism of action of double-stranded RNA activity against western corn rootworm ( <i>Diabrotica virgifera virgifera</i> LeConte). PLoS ONE 7(10): e47534. |
| 29. | Grapevine | Stable transgenics                                                                      | Grapevine leafroll-associated virus-2 | USA                    | Cornell Univ, NYSAES, Dept Plant Pathol<br><br>USDA-ARS: US Vegetable Lab; Pacific Basin Agricul Res Ctr<br><br>Univ Washington , Dept Lab Medicine              | Ling KS, Zhu HY, Gonsalves D. 2008. Resistance to Grapevine leafroll associated virus-2 is conferred by post-transcriptional gene silencing in transgenic <i>Nicotiana benthamiana</i> . Transgenic Res 17(4): 733-40.                                                                                                                                                              |
| 30. | Grapevine | Transient expression                                                                    | Grapevine fanleaf virus               | France                 | Univ Haute Alsace, Lab Vigne Biotechnol & Environm, F-68008 Colmar                                                                                               | Jelly N S, Schellenbaum P, Walter B, Maillot P. 2012. Transient expression of artificial microRNAs targeting grapevine fanleaf virus and evidence for rna silencing in grapevine somatic embryos. Transgenic Res 21 (6): 1319-1327                                                                                                                                                  |
| 31. | Grapevine | Transient expression                                                                    | Grapevine fanleaf virus               | USA                    | Cornell Univ NYSAES, Geneva, NY                                                                                                                                  | Oliver J E and Fuchs M. 2011. Usefulness of a high-throughput transient expression system to test virus-derived genetic constructs for resistance against grapevine fanleaf virus. Phytopathology 101 (6): S132-S132                                                                                                                                                                |
| 32. | Potato    | Stable transgenics silencing plant gene                                                 | Late blight                           | Germany                | Leibniz Inst of Plant Biochem, Dept of Stress & Develop Biol<br><br>Martin Luther Univ Halle-Wittenberg: Inst Genet; Dept of Cellular Biochem; Biocenter         | Eschen-Lippold L, Landgraf R, Smolka U et al. 2012. Activation of defense against <i>Phytophthora infestans</i> in potato by down-regulation of syntaxin gene expression. New Phytol 193(4): 985-96.                                                                                                                                                                                |
| 33. | Potato    | <i>Agrobacterium tumefaciens</i> (agroinfiltration) transient assay for functional test | Late blight                           | USA                    | Univ Wisconsin-Madison: Dept of Horticult; Dept Agron                                                                                                            | Bhaskar PB, Venkateshwaran M, Wu L et al. 2009. <i>Agrobacterium</i> -mediated transient gene expression and silencing: a rapid tool for functional gene assay in potato. PLoS ONE: 4(6): e5812.                                                                                                                                                                                    |
| 34. | Potato    | Stable transgenics (overexpression more resistant, RNAi less resistant)                 | Late blight                           | China                  | Minist Educ, Huazhong Agric Univ, Key Lab of Horticultur Plant BiolDis<br><br>NatI Ctr for Vegetable Improv, Potato Engineer & Technol Res Ctr of Hubei Province | Ni XM, Tian ZD, Liu J et al. 2010. Cloning and molecular characterization of the potato RING finger protein gene <i>StRFP1</i> and its function in potato broad-spectrum resistance against <i>Phytophthora infestans</i> . J Plant Physiol 167(6): 488-96.                                                                                                                         |
| 35. | Potato    | Stable transgenics silencing plant gene                                                 | Late blight<br>Salt tolerance         | China                  | Minist Educ, Huazhong Agric Univ, Key Lab of Horticultur Plant Biol                                                                                              | Ni XM, Tian ZD, Liu J et al. 2010. <i>StPUB17</i> , a novel potato UND/PUB/ARM repeat type gene, is associated with late blight                                                                                                                                                                                                                                                     |



|     |        |                                                                                              |                                                           |                       |                                                                                                                                                                                                   |                                                                                                                                                                                                                                                           |
|-----|--------|----------------------------------------------------------------------------------------------|-----------------------------------------------------------|-----------------------|---------------------------------------------------------------------------------------------------------------------------------------------------------------------------------------------------|-----------------------------------------------------------------------------------------------------------------------------------------------------------------------------------------------------------------------------------------------------------|
|     |        | (- effect)                                                                                   |                                                           |                       | Natl Ctr for Vegetable Improv, Potato Engineer & Technol Res Ctr of Hubei Province                                                                                                                | resistance and NaCl stress. Plant Sci 178(2): 158-169.                                                                                                                                                                                                    |
| 36. | Potato | <i>Agrobacterium tumefaciens</i> (agroinfiltration) transient assay for silencing viral gene | Potato virus Y (PVY)                                      | China                 | Guizhou Univ, Coll Life Sci                                                                                                                                                                       | Li Q, Tao G, Qiu YB et al. 2009. RNAi vector targeting and interference effect determination of <i>PVY CP</i> gene. Genom Appl Biol 28(3) : 460-64.                                                                                                       |
| 37. | Potato | Stable transgenics for silencing viral gene                                                  | PVY                                                       | Hungary               | Agricul Biotechnol Ctr<br>Hungarian Acad Sci, Agricul Res Inst<br>Corvinus Univ of Budapest, Dept Plant Pathol                                                                                    | Bukovinszki A, Diveki Z, Csanyi M et al. 2007. Engineering resistance to PVY in different potato cultivars in a marker-free transformation system using a 'shooter mutant' <i>A. tumefaciens</i> . Plant Cell Rep 26(4): 459-65.                          |
| 38. | Potato | Stable transgenics for silencing viral gene                                                  | PVY +<br>Potato leafroll virus (PLRV) +<br>Potato virus A | UK<br>South Korea     | James Hutton Inst, UK<br>Seoul Womens Univ, Dept Hort Sci, South Korea<br>Natl Inst Hort & Herbal Sci, Rural Dev Adm, South Korea                                                                 | Chung B, Yoon JY, Palukaitis P. 2013. Engineered resistance in potato against potato leafroll virus, potato virus A and potato virus Y. Virus Genes 47(1): 86-92.                                                                                         |
| 39. | Potato | Stable transgenics for silencing viral gene                                                  | PVY +<br>PLRV +<br>Potato virus X                         | Pakistan              | Natl Inst Biotechnol & Genetic Engineer, Agricul Biotechnol Division<br>PAEC, Director General Agric & Biotechnol                                                                                 | Arif M, Azhar U, Arshad M et al. 2012. Engineering broad-spectrum resistance against RNA viruses in potato. Transgenic Res 21(2): 303-11.                                                                                                                 |
| 40. | Potato | Stable transgenics for silencing viral gene                                                  | PLRV +<br>Potato spindle tuber viroid                     | Russia                | All-Russian Potato Res Inst<br>All-RSIAB<br>Shemyakin & Ovchinnikov Inst Bioorganic RAS                                                                                                           | Khromova LM, Beketova MP, Shmyglya IV et al. 2007. Generation of potato transgenic lines resistant to potato leafroll virus and potato spindle tuber viroid. Potato production and innovative technologies. Wageningen Academic Publishers. 405-10.       |
| 41. | Potato | Potato virus X +<br>Potato virus Y (PVY)                                                     | PVY<br>Potato virus X                                     | China                 | Shanxi Acad Agric Sci, Inst of Crop Genet                                                                                                                                                         | Bai YF, Guo ZH, Wang XQ et al. 2009. Generation of double-virus-resistant marker-free transgenic potato plants. Prog Nat Sci 19(5): 543-48.                                                                                                               |
| 42. | Potato | Potato leafroll virus (PLRV) +<br>PVY                                                        | PLRV<br>PVY                                               | USA                   | USDA-ARS, Pacific West Area, IAREC, Vegetable & Forage Crops Res Unit, Res Geneticist; Res Plant Pathol                                                                                           | Arif M, Thomas PE, Crosslin JM, Brown CR. 2009. Development of molecular resistance in potato against potato leaf roll virus and potato virus Y through <i>Agrobacterium</i> -mediated double transgenesis. Pak J Bot 41(2): 945-54.                      |
| 43. | Potato | PLRV +<br>PVY                                                                                | PLRV<br>PVY                                               | USA<br>Pakistan       | USDA-ARS, Pacific W Area, IAREC, Vegetable & Forage Crop Prod Res Unit, USA<br>NW Frontier Prov Agricul Univ, Dept Plant Pathol, Pakistan                                                         | Arif M, Thomas PE, Crosslin JM, Brown CR. 2009. <i>Agrobacterium</i> -mediated transformation of potato using PLRV-REP and PVY CP genes and assessment of replicase mediated resistance against natural infection of PLRV. Pakistan J Bot 41(3): 1477-88. |
| 44. | Beet   | Beet necrotic yellow vein virus                                                              | Rhizomania disease (BNYVV)                                | Netherlands<br>Greece | Wageningen Univ, Dept Plant Sci, Virol Lab, Netherlands<br>Agric Univ Athens, Dept Crop Sci, Lab Plant Breed & Biometry, Greece<br>Univ Crete, Dept Biol, Sect Biotechnol & Appl Biometry, Greece | Pavli OI, Panopoulos N J, Goldbach R, Skaracis GN. 2010. BNYVV-derived dsRNA confers resistance to rhizomania disease of sugar beet as evidenced by a novel transgenic hairy root approach. Transgenic Res 19(5): 915-22.                                 |

|     |      |                                             |                            |                   |                                                                                                                                         |                                                                                                                                                                                                                                                              |
|-----|------|---------------------------------------------|----------------------------|-------------------|-----------------------------------------------------------------------------------------------------------------------------------------|--------------------------------------------------------------------------------------------------------------------------------------------------------------------------------------------------------------------------------------------------------------|
| 45. | Beet | Stable transgenics for silencing viral gene | Rhizomania disease (BNYVV) | Finland<br>Sweden | Univ Helsinki, Dept Appl Biol, Finland<br>Syngenta Seeds AB, Sweden<br>Swedish Univ Agricul Sci, Dept Plant Biol & Forest Genet, Sweden | Lennefors BL, van Roggen PM, Yndgaard F et al. 2008. Efficient dsRNA-mediated transgenic resistance to Beet necrotic yellow vein virus in sugar beets is not affected by other soilborne and aphid-transmitted viruses. <i>Transgenic Res</i> 17(2): 219-28. |
|-----|------|---------------------------------------------|----------------------------|-------------------|-----------------------------------------------------------------------------------------------------------------------------------------|--------------------------------------------------------------------------------------------------------------------------------------------------------------------------------------------------------------------------------------------------------------|

## Supplementary Material 4d: Other transient assays

|    | Plant     | Technique                                                             | Disease/Pest              | Country                      | University or Lab                                                                                                                                                                                 | References                                                                                                                                                                                                                        |
|----|-----------|-----------------------------------------------------------------------|---------------------------|------------------------------|---------------------------------------------------------------------------------------------------------------------------------------------------------------------------------------------------|-----------------------------------------------------------------------------------------------------------------------------------------------------------------------------------------------------------------------------------|
| 1. | Wheat     | BSMV-based VIGS in wheat                                              | Leaf rust                 | Switzerland<br>Israel<br>USA | Univ Zürich, Inst Plant Biol, Switzerland<br>Univ Haifa, Inst Evolution, Israel<br>Purdue Univ, Lilly Hall Life Sci, Dept Agron, USA                                                              | Loutre C, Wicker T, Travella S et al. 2009. Two different CC-NBS-LRR genes are required for <i>Lr10</i> -mediated leaf rust resistance in tetraploid and hexaploid wheat. <i>Plant J</i> 60(6): 1043-54.                          |
| 2. | Wheat     | BSMV-based VIGS in wheat                                              | Leaf rust                 | China                        | Agr Univ Hebei, Coll Plant Protect, Biol Control Ctr<br>Plant Dis & Pests Hebei Prov                                                                                                              | Zhang LR, Yang WX, Liu DQ. 2011. <i>TaRAR1</i> is required for <i>Lr24</i> -mediated wheat leaf rust resistance. <i>Agr Sci China</i> 10(11): 1732-38.                                                                            |
| 3. | Wheat     | Agroinoculation<br><i>Agrobacterium tumefaciens</i>                   | Wheat dwarf virus         | Hungary                      | Agric Biotechnol Ctr<br>Corvinus Univ Budapest, Fac Horticultur Sci<br>Agricul Res Inst Hungarian Acad Sci                                                                                        | Benkovics AH, Vida G, Nelson D et al. 2010. Partial resistance to Wheat dwarf virus in winter wheat cultivars. <i>Plant Pathol</i> 59(6): 1144-1151.                                                                              |
| 4. | Grapevine | Agroinfiltration<br><i>Agrobacterium tumefaciens</i>                  | Downy mildew              | France                       | Université de Haute Alsace, Laboratoire Vigne, Biotechnol & Environnement<br>IBMP CNRS, Dépt Réseaux Métaboliques chez les Végétaux<br>INRA & Univ Strasbourg, Lab Génétique & Amélioration Vigne | Le Henanff G, Heitz T, Mestre P et al. 2009. Characterization of <i>Vitis vinifera</i> NPR1 homologs involved in the regulation of pathogenesis-related gene expression. <i>BMC Plant Biol</i> 9: 54.                             |
| 5. | Grapevine | Agroinfiltration<br><i>Agrobacterium tumefaciens</i>                  | Downy mildew              | France                       | Univ Strasbourg, INRA: Lab Génétique & Amélioration Vigne; Laboratoire d'Oenologie<br>INRA, CNRS, Lab Reproduction & Développement Plantes                                                        | Schmidlin L, Poutaraud A, Claudel P et al. 2008. A Stress-inducible resveratrol O-methyltransferase involved in the biosynthesis of pterostilbene in grapevine. <i>Plant Physiol</i> 148(3): 1630-39.                             |
| 6. | Grapevine | Agroinfiltration<br><i>Agrobacterium tumefaciens</i>                  | Downy mildew              | France                       | Inst Natl Recherche Agronomique & Université Louis Pasteur Strasbourg, Lab Génétique & Amélioration Vigne, UMR 1131 Santé Vigne et Qualité du Vin                                                 | Santos-Rosa M, Poutaraud A, Merdinoglu, D, Mestre P. 2008. Development of a transient expression system in grapevine via agro-infiltration. <i>Plant Cell Rep</i> 27(6): 1053-63.                                                 |
| 7. | Grapevine | Agroinfiltration<br><i>Agrobacterium tumefaciens</i>                  | Powdery mildew            | China                        | Northwest A&F Univ: Coll Horticult; Key Lab Horticultur Plant Germplasm Resour Utilization in Northwest China, Minist Agric; Shaanxi Key Lab Mol Biol Agric                                       | Guan X, Zhao HQ, Xu Y, Wang YJ. 2011. Transient expression of glyoxal oxidase from the Chinese wild grape <i>Vitis pseudoreticulata</i> can suppress powdery mildew in a susceptible genotype. <i>Protoplasma</i> 248(2): 415-23. |
| 8. | Grapevine | Agroinfiltration<br><i>Agrobacterium tumefaciens</i><br>agroinfection | Leafroll-associated virus | USA<br>Spain                 | Oregon State Univ: Dept of Botany & Plant Pathol; Ctr Genome Res & Biocomputing, USA<br>Univ Lleida, Ciencia Forestal, Dept Produccio Vegetal, Spain                                              | Liu YP, Peremyslov VV, Medina V, Dolja VV. 2009. Tandem leader proteases of grapevine leafroll-associated virus-2: Host-specific functions in the infection cycle. <i>Virology</i> 383(2): 291-99.                                |

|     |        |                                                                                                        |                            |                            |                                                                                                                                                                                                                                                                                                                                                                                         |                                                                                                                                                                                                                                                                                 |
|-----|--------|--------------------------------------------------------------------------------------------------------|----------------------------|----------------------------|-----------------------------------------------------------------------------------------------------------------------------------------------------------------------------------------------------------------------------------------------------------------------------------------------------------------------------------------------------------------------------------------|---------------------------------------------------------------------------------------------------------------------------------------------------------------------------------------------------------------------------------------------------------------------------------|
| 9.  | Potato | Agroinfiltration<br><i>Agrobacterium tumefaciens</i>                                                   | Late blight                | Netherlands                | Univ Wageningen                                                                                                                                                                                                                                                                                                                                                                         | Champouret N. 2010. Functional genomics of <i>Phytophthora infestans</i> effectors and <i>Solanum</i> resistance genes. PhD thesis. Wageningen University. 154pp.                                                                                                               |
| 10. | Potato | Agroinfection<br>Agroinfiltration                                                                      | Late blight                | Netherlands                | Univ Wageningen, Phytopathol Lab<br>Ctr for BioSystems Genom                                                                                                                                                                                                                                                                                                                            | Van Poppel P, Jiang RHY, Sliwka J, Govers F. 2009. Recognition of <i>Phytophthora infestans</i> Avr4 by potato R4 is triggered by C-terminal domains comprising W motifs. Mol Plant Pathol 10(5): 611-20.                                                                       |
| 11. | Potato | Agroinfection<br>Agroinfiltration<br>Genetic mapping<br>Bacterial artificial chromosome marker landing | Late blight                | Netherlands<br>China<br>UK | Univ Wageningen, Phytopathol Lab, Netherlands<br>Ctr BioSystems Genom, Netherlands<br>CAAS, Inst of Vegetables & Flowers, China<br>Scottish Crop Res Inst, Plant-Pathology Programme, UK                                                                                                                                                                                                | van Poppel P, Guo J, de Vondervoort P et al. 2008. The <i>Phytophthora infestans</i> avirulence gene <i>Avr4</i> encodes an RXLR-dEER effector. Mol Plant Microbe Interact 21(11): 1460-70.                                                                                     |
| 12. | Potato |                                                                                                        | Late blight                | China<br>Netherlands       | Shandong Acad Agricul Sci, Key Lab Crop Genetic Improv & Biotechnol, China<br>Wageningen UR Plant Breed, Netherlands<br>Sino-Dutch Joint CAAS, Inst Vegetables & Flowers, Key Lab Horticul Crops Genet Improv Minist Agric, Lab of Horticultural Genom Technol, China<br>Huazhong Agric Univ, Minist Educ, Coll Horticul & Forestry, Dept Vegetable Crops, Key Lab Horticul Biol, China | Li G, Huang S, Guo X et al. 2011. Cloning and characterization of R3B; members of the R3 superfamily of late blight resistance genes show sequence and functional divergence. Mol Plant Microbe Interact 24(10): 1132-42 ( <b>also in transgenesis section</b> ). <sup>vi</sup> |
| 13. | Beet   | Agroinoculation<br>Root agroinfection<br>Agroinfiltration<br><i>Agrobacterium tumefaciens</i>          | Rhizomania disease (BNYVV) | Italy<br>France            | Univ Bologna, DipSA Plant Pathol, Italy<br>Univ Strasbourg, CNRS, Inst Biol Mol Plantes, France                                                                                                                                                                                                                                                                                         | Delbianco A, Lanzoni C, Klein E et al. 2013. Agroinoculation of Beet necrotic yellow vein virus cDNA clones results in plant systemic infection and efficient <i>Polymyxa betae</i> transmission. Mol Plant Pathol 14(4): 422-28.                                               |

## Supplementary Material 4e: Cloning of resistance gene

|    | Plant | Origin of transfered genes | Pests/Diseases       | Country                         | University or lab                                                                                                                                                           | References                                                                                                                                                                                                                                                 |
|----|-------|----------------------------|----------------------|---------------------------------|-----------------------------------------------------------------------------------------------------------------------------------------------------------------------------|------------------------------------------------------------------------------------------------------------------------------------------------------------------------------------------------------------------------------------------------------------|
| 1. | Wheat | Wheat                      | Leaf rust            | Canada<br>Switzerland<br>France | Agric & Agri-Food Canada, Cereal Res Ctr, Canada<br>Univ Zürich, Inst Plant Biol, Switzerland<br>Inst Natl Recherche Agronomique, Amélioration et Santé des Plantes, France | Cloutier S, McCallum BD, Loutre C et al. 2007. Leaf rust resistance gene <i>Lr1</i> , isolated from bread wheat ( <i>Triticum aestivum</i> L.) is a member of the large psr567 gene family. Plant Mol Biol 65(1-2): 93-106 ( <b>also in MAS section</b> ). |
| 2. | Wheat | -                          | Fusarium head blight | USA<br>Czech Republic<br>France | Univ Minnesota, Dept Agron & Plant Genet, USA<br>Kansas State Univ: USDA-ARS, Plant Pathol Dept, USA<br>Inst Experim Botany, Czech Republic<br>URGV-INRA, France            | Liu SX,. Pumphrey MO, Gill BS et al. 2008. Toward positional cloning of <i>Fhb1</i> , a major QTL for Fusarium head blight resistance in wheat. Cereal Res Commun 36(Suppl. 6): 195-201.                                                                   |

|    |                  |                               |                           |                      |                                                                                                                                                                                                                                                                                                                                                                                       |                                                                                                                                                                                                                                                             |
|----|------------------|-------------------------------|---------------------------|----------------------|---------------------------------------------------------------------------------------------------------------------------------------------------------------------------------------------------------------------------------------------------------------------------------------------------------------------------------------------------------------------------------------|-------------------------------------------------------------------------------------------------------------------------------------------------------------------------------------------------------------------------------------------------------------|
| 3. | OSR<br>Sunflower | <i>Macadamia integrifolia</i> | Sclerotinia +<br>Blackleg | Iran<br>Russia       | Cotton Res Inst Iran, Iran<br>Russian State Agrarian Univ – MTTA, Dept of Agric Biotechnol, Russia                                                                                                                                                                                                                                                                                    | Ghasemi BK, Sheveloukha VS, Karlov GI. 2008. Design, construction and cloning of pCAMBIA-MiAMP1 vector for enhancing disease resistance in plants using <i>Agrobacterium</i> -mediated transformation. J Appl Biosci 10(2): 538-46.                         |
| 4. | Potato           | Potato                        | Late blight               | China                | Minist Educ, Huazhong Agric Univ, Key Lab of Horticultur Plant BiolDis<br>Natl Ctr for Vegetable Improv, Potato Engineer & Technol Res Ctr of Hubei Province                                                                                                                                                                                                                          | Ni XM, Tian ZD, Liu J et al. 2010. Cloning and molecular characterization of the potato RING finger protein gene <i>StRFP1</i> and its function in potato broad-spectrum resistance against <i>Phytophthora infestans</i> . J Plant Physiol 167(6): 488-96. |
| 5. | Potato           | -                             | Late blight               | China<br>Netherlands | Shandong Acad Agric Sci, Key Lab Crop Genetic Improv & Biotechnol, China<br>Wageningen UR Plant Breed, Netherlands<br>Sino-Dutch Joint CAAS, Inst Vegetables & Flowers, Key Lab Horticul Crops Genet Improv Minist Agric, Lab of Horticultural Genom Technol, China<br>Huazhong Agric Univ, Minist Educ, Coll Horticul & Forestry, Dept Vegetable Crops, Key Lab Horticul Biol, China | Li G, Huang S, Guo X et al. 2011. Cloning and characterization of R3B; members of the R3 superfamily of late blight resistance genes show sequence and functional divergence. Mol Plant Microbe Interact 24(10): 1132-42. <sup>vii</sup>                    |
| 6. | Potato           | -                             | Late blight               | Netherlands<br>UK    | Wageningen UR Plant Breed, Netherlands<br>Sainsbury Lab Colney Lane, UK                                                                                                                                                                                                                                                                                                               | Pel MA, Foster SJ, Park TH et al. 2009. Mapping and cloning of late blight resistance genes from <i>Solanum venturii</i> using an interspecific candidate gene approach. Mol Plant Microbe Interact 22(5): 601-15.                                          |

## Supplementary Material 4f: Mutagenesis

|    | Plant                                                                                              | Disease/Pest                                            | Country      | University or Lab                                                                                                                                                              | References                                                                                                                                                                                                                                  |
|----|----------------------------------------------------------------------------------------------------|---------------------------------------------------------|--------------|--------------------------------------------------------------------------------------------------------------------------------------------------------------------------------|---------------------------------------------------------------------------------------------------------------------------------------------------------------------------------------------------------------------------------------------|
| 1. | Wheat<br>(EMS-mutagenized)                                                                         | Leaf rust<br>Stem rust<br>Stripe rust<br>Powdery mildew | USA          | Montana State Univ, Dept Plant Sci & Plant Pathol<br>USDA-ARS, Cereal Dis Lab<br>Washington State Univ, Dept Plant Pathol<br>USDA-ARS, Wheat Genet Physiol Qual & Dis Res Unit | Campbell J, Zhang HT, Giroux MJ et al. 2012. A mutagenesis-derived broad-spectrum disease resistance locus in wheat. Theor Appl Genet 125(2): 391-404.                                                                                      |
| 2. | Barley<br>(natural, induced and site-directed mutant alleles tested in transient expression assay) | Powdery mildew                                          | Germany      | Max Planck Inst Plant Breed Res, Dept Plant Microbe Interactions                                                                                                               | Reinstädler A, Müller J, Czembor JH et al. 2010. Novel induced <i>mlo</i> mutant alleles in combination with site-directed mutagenesis reveal functionally important domains in the heptahelical barley Mlo protein. BMC Plant Biol 10: 31. |
| 3. | Potato<br>(Site-directed mutagenesis)                                                              | Potato virus Y                                          | USA<br>Korea | Cornell Univ, Dept Plant Breed, USA<br>USDA-ARS, Dept Plant Pathol & Plant-Microbe Biol, USA<br>Cornell Univ, USA                                                              | Cavatorta J, Perez KW., Gray SM et al. 2011. Engineering virus resistance using a modified potato gene. Plant Biotechnol J 9(9): 1014-21.                                                                                                   |

followed by  
transgenesis)

Boyce Thompson Inst, USA  
Andong Natl Univ, Dept Horticul & Breed, Korea  
Univ Wisconsin, Dept Agron, Lab Genet, USA

## Supplementary Material 4g: Conventional breeding

|    | Plant | Disease/Pest                                                | Country          | University or Lab                                                                                                                                                                         | References                                                                                                                                                                                                                                                                                                         |
|----|-------|-------------------------------------------------------------|------------------|-------------------------------------------------------------------------------------------------------------------------------------------------------------------------------------------|--------------------------------------------------------------------------------------------------------------------------------------------------------------------------------------------------------------------------------------------------------------------------------------------------------------------|
| 1. | Wheat | Leaf rust                                                   | USA<br>Australia | Kansas State Univ, Dept Plant Pathol, Throckmorton Plant Sci Ctr,<br>Wheat Genet & Genomic Resour Ctr, USA<br>Univ Sydney, Plant Breed Inst, Australia                                    | Qi LL, Friebe B, Zhang P, Gill BS. 2007. Homoeologous recombination, chromosome engineering and crop improvement. <i>Chromosome Res</i> 15(1): 3-19.                                                                                                                                                               |
| 2. | Wheat | Leaf rust                                                   | Sweden<br>Mexico | CIMMYT, Mexico<br>Swedish Univ Agr Sci, Dep Forest Mycol & Pathol, Sweden<br>Campo Experim Valle Mexico INIFAP, Mexico                                                                    | Herrera-Foessel SA, Singh RP, Huerta-Espino J et al. 2008. Genetic analysis of slow-rusting resistance to leaf rust in durum wheat. <i>Crop Sci</i> 48(6): 2132-40.                                                                                                                                                |
| 3. | Wheat | Leaf rust                                                   | Belarus          | Natl Acad Sci Belarus, Inst Genet & Cytol                                                                                                                                                 | Buloichik AA, Borziak VS, Voluevich EA. 2010. Chromosomal location of specific and nonspecific components of polygenic resistance to brown rust in common wheat. <i>Russ J Genet</i> 46(4): 409-16.                                                                                                                |
| 4. | Wheat | Leaf rust<br>Stripe rust                                    | India<br>Iran    | Punjab Agricul Univ, Dept Plant Breed, Genet & Biotechnol, India<br>Agricul Organization Kermanshah, Iran<br>Directorate Wheat Res, Regional Res Stn, India<br>Indian Inst Technol, India | Chhuneja P, Kaur S, Goel RK et al. 2008. Transfer of leaf rust and stripe rust resistance from <i>Aegilops umbellulata</i> Zhuk. to bread wheat ( <i>Triticum aestivum</i> L.). <i>Gen Resour Crop Evol</i> 55(6): 849-59.                                                                                         |
| 5. | Wheat | Leaf rust<br>Stripe rust                                    | India            | Punjab Agr Univ, Sch Agr Biotechnol                                                                                                                                                       | Agarwal S, Saini RG. 2009. Undescribed wheat gene for partial leaf rust and stripe rust resistance from Thatcher derivatives RL6058 and 90RN2491 carrying <i>Lr34</i> . <i>J Appl Genet</i> 50(3): 199-204.                                                                                                        |
| 6. | Wheat | Leaf rust<br>Stem rust                                      | Brazil           | Fundacao Univ Passo Fundo UPF<br>Empresa Brasileira Pesquisa Agropecuaria Embrapa                                                                                                         | Casassola A, Brammer SP. 2011. Chromosomes translocations between wheat and rye: an alternative to plant breeding. <i>Ciencia Rural</i> 41(8): 1307-14. (Review)                                                                                                                                                   |
| 7. | Wheat | Leaf rust<br>Stem rust<br>Powdery mildew<br>Loose smut      | Russia           | Siberian Branch of RAS, Inst Cytol & Genet                                                                                                                                                | Laikova LI, Belan IA, Badaeva ED et al. 2013. Development and study of spring bread wheat variety Pamyati Maystrenko with introgression of genetic material from synthetic hexaploid <i>Triticum timopheevii</i> Zhuk. x <i>Aegilops tauschii</i> Coss. <i>Russ J Genet</i> 49(1): 89-97.                          |
| 8. | Wheat | Leaf rust<br>Stem rust<br>Powdery mildew                    | Russia           | Inst Cytol & Genet, Siberian Branch of RAS                                                                                                                                                | Obukhova LV, Laikova LI, Shumnyi VK. 2010. Analysis of storage proteins (prolamines, puroindolines and Waxy) in common wheat lines <i>Triticum aestivum</i> L. x ( <i>Triticum timopheevii</i> Zhuk. x <i>Triticum tauschii</i> ) with complex resistance to fungal infections. <i>Russ J Genet</i> 46(6): 672-76. |
| 9. | Wheat | Tan spot<br><i>Stagonospora nodorum</i> blotch<br>Stem rust | USA              | USDA-ARS, Northern Crop Sci Lab<br>N Dakota State Univ, Dep Entomol                                                                                                                       | Friesen T L, Xu SS, Harris MO. 2008. Stem rust, tan spot, <i>Stagonospora nodorum</i> blotch, and hessian fly resistance in langdon durum- <i>Aegilops tauschii</i> synthetic hexaploid wheat lines. <i>Crop Sci</i> 48(3): 1062-70.                                                                               |

|     |           |                                                                             |                         |                                                                                                                                                                                     |                                                                                                                                                                                                                                                                            |
|-----|-----------|-----------------------------------------------------------------------------|-------------------------|-------------------------------------------------------------------------------------------------------------------------------------------------------------------------------------|----------------------------------------------------------------------------------------------------------------------------------------------------------------------------------------------------------------------------------------------------------------------------|
|     |           | Hessian fly                                                                 |                         |                                                                                                                                                                                     |                                                                                                                                                                                                                                                                            |
| 10. | Wheat     | Stripe rust<br>Powdery mildew                                               | China                   | Sichuan Agric Univ, State Key Lab Plant Breed & Genet<br>Univ Electronic Sci & Technol China, School of Life Sci & Technol                                                          | Fu, S., Tang, Z., Ren, Z. and Zhang, H. (2010). Transfer to wheat ( <i>Triticum aestivum</i> ) of small chromosome segments from rye ( <i>Secale cereale</i> ) carrying disease resistance genes. J Appl Genet 51(2): 115-21.                                              |
| 11. | Wheat     | Stripe rust                                                                 | Australia               | Univ Sydney, Plant Breed Inst                                                                                                                                                       | Pathan AK, Park RF, Wellings CR, Bariana HS. 2007. The expression and genetics of resistance to stripe (yellow) rust in three European and four New Zealand wheat cultivars. J Appl Genet 48(3): 199-210.                                                                  |
| 12. | Wheat     | Fusarium head blight                                                        | Canada<br>China         | Agric & Agri-Food Canada, Eastern Cereal & Oilseed Res Ctr, Canada<br>Sichuan Agric Univ, Triticeae Res Inst, Chengdu Acad Sci, China<br>Univ Saskatchewan, Dept Plant Sci, Canada. | Zeng J, Cao W, Hucl P et al. 2013. Molecular cytogenetic analysis of wheat - <i>Elymus repens</i> introgression lines with resistance to Fusarium head blight. Genome 56(1): 75-82.                                                                                        |
| 13. | Wheat     | Fusarium head blight                                                        | USA                     | Univ Minnesota: Dept Agron & Plant Genet; USDA-ARS, Cereal Dis Lab<br>Land Inst                                                                                                     | Turner MK, DeHaan LR, Jin Y, Anderson JA. 2013. Wheatgrass-wheat partial amphiploids as a novel source of stem rust and Fusarium head blight resistance. Crop Science 53(5): 1994-2005.                                                                                    |
| 14. | Wheat     | Fusarium crown rot                                                          | Australia               | Univ Southern Queensland, Ctr Systems Biol<br>New South Wales Dept Primary Ind<br>Plant Breed Inst                                                                                  | Martin A, Simpfendorfer S, Hare RA, Sutherland MW. 2013. Introgression of hexaploid sources of crown rot resistance into durum wheat. Euphytica 192(3): 463-70.                                                                                                            |
| 15. | Wheat     | Tan spot<br><i>Stagonospora nodorum</i> blotch                              | USA                     | North Dakota State Univ, Dep Plant Sci<br>USA-ARS: Forage & Range Res Lab; Northern Crop Sci Lab                                                                                    | Oliver RE, Cai X, Wang RC et al. 2008. Resistance to tan spot and <i>Stagonospora nodorum</i> blotch in wheat-alien species derivatives. Plant Dis 92(1): 150-57.                                                                                                          |
| 16. | Wheat     | Hessian fly<br>Russian wheat aphid<br>Sunn pest                             | Syria<br>USA<br>Marocco | Internatl Ctr Agricul Res Dry Areas (ICARDA), Syria<br>Kansas State Univ: USDA-ARS; Dept Entomol, USA<br>Inst Natl Recherche Agronomique (INRA), Marocco                            | El Bouhssini M, Ogbonnaya FC, Chen M et al. 2013. Sources of resistance in primary synthetic hexaploid wheat ( <i>Triticum aestivum</i> L.) to insect pests: Hessian fly, russian wheat aphid and sunn pest in the fertile crescent. Genet Resour Crop Evol 60(2): 621-27. |
| 17. | Wheat     | Barley yellow dwarf virus                                                   | China                   | Northwest A&F Univ, Key Lab Integrated Pest Management Crops<br>Northwes, Key Lab Plant Protect Resour & Pest Management, State Key Lab Crop Stress Biol Arid Areas, Minist         | Song S, Tao Y, Zhang HW, Wu YF. 2013. <i>Psathyrostachys huashanica</i> , a potential resource for resistance to barley yellow dwarf virus-GAV. Eur J Plant Pathol 137(2): 217-21.                                                                                         |
| 18. | Barley    | Fusarium head blight                                                        | Canada                  | Univ Laval, Dept Phytologie, Fac Sci l'agriculture & l'alimentation                                                                                                                 | Marchand S, Fonquerne G, Clermont I et al. 2008. Androgenic response of barley accessions and F1s with Fusarium head blight resistance. Plant Cell Rep 27(3): 443-51.                                                                                                      |
| 19. | Sunflower | Rust<br>White rust<br>Verticillium wilt<br>Powdery mildew<br>Sunflower moth | Argentina               | Ctr Recursos Nat Zona Semiárida CERZOS CONICET<br>Univ Nacl Sur, Dept Agron                                                                                                         | Gutierrez A, Cantamutto M, Poverene M. 2012. Disease tolerance in <i>Helianthus petiolaris</i> : A genetic resource for sunflower breeding. Plant Prod Sci 15(3): 204-08.                                                                                                  |
| 20. | Sunflower | Sunflower broomrape                                                         | Spain                   | Koipesol Semillas S.A.<br>Inst de Agricultura Sostenible (IAS-CSIC)                                                                                                                 | Rodríguez-Ojeda MI, Pineda-Martos R, Alonso LC et al. 2013. A dominant avirulence gene in <i>Orobanche cumana</i> triggers <i>Or5</i> resistance in sunflower. Weed Res 53(5): 322-27.                                                                                     |
| 21. | Potato    | Potato virus Y<br>Potato leafroll virus                                     | USA                     | USDA-ARS: Aberdeen Res & Extension Ctr; Crop Genet & Production Res Unit                                                                                                            | Novy RG, Gillen AM, Whitworth JL. 2007. Characterization of the expression and inheritance of potato leafroll virus (PLRV) and potato virus Y (PVY) resistance in three generations of germplasm derived from <i>Solanum tuberosum</i> . Theor Appl Genet 114(7): 1161-72. |

|     |           |                         |        |                                                                                                                                                                           |                                                                                                                                                                                                                          |
|-----|-----------|-------------------------|--------|---------------------------------------------------------------------------------------------------------------------------------------------------------------------------|--------------------------------------------------------------------------------------------------------------------------------------------------------------------------------------------------------------------------|
| 22. | Grapevine | Grapevine fanleaf virus | France | INRA, UMR IBSV, F-06903 Sophia Antipolis,<br>INRA, UMR EGFV, F-33883 Villenave Dornon<br>INRA, UMR DiAPC, F-34060 Montpellier<br>INRA, UMR IBSV, F-06903 Sophia Antipolis | Esmejaud D, Van Ghelder C, Voisin R et al. 2010. Host suitability of vitis and vitis-muscadinia material to the nematode xiphinema index over one to four years. <i>Amer J of Enology and Viticulture</i> 61 (1): 96-101 |
|-----|-----------|-------------------------|--------|---------------------------------------------------------------------------------------------------------------------------------------------------------------------------|--------------------------------------------------------------------------------------------------------------------------------------------------------------------------------------------------------------------------|

## Supplementary Material 4h: Molecular markers used to tag resistance genes and for MAS

|     | Plant | Pest / Disease | Country   | University or Lab                                                                                                                    | References                                                                                                                                                                                                    |
|-----|-------|----------------|-----------|--------------------------------------------------------------------------------------------------------------------------------------|---------------------------------------------------------------------------------------------------------------------------------------------------------------------------------------------------------------|
| 1.  | Wheat | Leaf rust      | Australia | Univ Sydney, Plant Breed Inst                                                                                                        | Dadkhodaie NA, Singh D, Park RF. 2011. Characterisation of resistance to leaf rust in an international bread wheat nursery. <i>J Plant Pathol</i> 93(3): 627-41.                                              |
| 2.  | Wheat | Leaf rust      | Turkey    | Middle E Tech Univ: Biotechnol Program; Dept Chem<br>Gaziosmanpasa Univ, Biotechnol Program<br>Thrace Agric Res Inst                 | Yildirim K, Boylu B, Atici E et al. 2012. In Turkish wheat cultivars the resistance allele of <i>Lr34</i> is ineffective against leaf rust. <i>Journal of Plant Diseases and Protection</i> 119(4): 135-41.   |
| 3.  | Wheat | Leaf rust      | Argentina | CICVyA INTA, Inst Genèt EA Favret                                                                                                    | Ingala L, Lopez M, Darino M et al. 2012. Genetic analysis of leaf rust resistance genes and associated markers in the durable resistant wheat cultivar Sinvaloch MA. <i>Theor Appl Genet</i> 124(7): 1305-14. |
| 4.  | Wheat | Leaf rust      | Argentina | INTA : EEA Marcos Juarez; Inst Recursos Biológicos ; EEA Bordenave, Argentina<br>Univ. of California, Dep Plant Sci, USA             | Bainotti C, Frascina J, Salines JH et al. 2009. Registration of 'BIOINTA 2004' Wheat. <i>J Plant Registr</i> 3(2): 165-69.                                                                                    |
| 5.  | Wheat | Leaf rust      | China     | Agric Univ Hebei, Dept Plant Pathol                                                                                                  | Yan HF, Yang WX, Chen YF et al. 2009. Specificity and stability of E-chromosome specific SCAR marker from <i>Thinopyrum</i> spp. for <i>Lr19</i> . <i>Acta Phytopath Sinica</i> 39(1): 76-81.                 |
| 6.  | Wheat | Leaf rust      | China     | Agric Univ Hebei, Dept Plant Pathol, Lab Mol Phytopathol<br>Biol Control Ctr Plant Dis &Pests of Hebei Province                      | Zhang N, Chen YT, Li YN et al. 2008. A novel STS marker for leaf rust resistance gene <i>Lr24</i> in wheat. <i>Acta Agron Sin</i> 34(2): 212-16.                                                              |
| 7.  | Wheat | Leaf rust      | China     | Agric Univ Hebei, Dept Plant Pathol, Lab Mol Phytopathol<br>Biol Control Ctr Plant Dis &Pests of Hebei Province                      | Shi LH, Zhang N, Hu YY et al. 2011. Evaluation of wheat leaf rust resistance of 10 new wheat cultivars (lines). <i>Sci Agric Sinica</i> 44(14): 2900-08.                                                      |
| 8.  | Wheat | Leaf rust      | China     | Agric Univ Hebei, Dept Plant Pathol, Lab Mol Phytopathol<br>Biol Control Ctr Plant Dis &Pests of Hebei Province                      | Zhang N, Ji HL, Yang WX, Liu DQ. 2009. Studies on gene <i>Lr24</i> conferring resistance to wheat leaf rust by TRAP analysis. <i>Sci Agric Sinica</i> 42(5): 1841-48.                                         |
| 9.  | Wheat | Leaf rust      | China     | Agric Univ Hebei, Coll Plant Protect, Dept Plant Pathol, Lab Mol Phytopathol<br>Biol Control Ctr Plant Dis & Pests of Hebei Province | Zhang N, Yang WX, Li YN et al. 2007. Developing molecular markers for leaf rust resistance gene <i>Lr45</i> in wheat based on SSR. <i>Acta Agron Sin</i> 33(4): 657-62.                                       |
| 10. | Wheat | Leaf rust      | China     | Agricul Univ Hebei, Dept Plant Pathol<br>Biol Control Ctr Plant Dis & Plant Pests Hebei Province                                     | Zhang N, Yang WX, Liu DQ. 2011. Identification and molecular tagging of leaf rust resistance gene ( <i>Lr24</i> ) in wheat. <i>Agr Sci China</i> 10(12): 1898-05.                                             |

|     |       |           |                     |                                                                                                                                                                                                        |                                                                                                                                                                                                                                                                                                              |
|-----|-------|-----------|---------------------|--------------------------------------------------------------------------------------------------------------------------------------------------------------------------------------------------------|--------------------------------------------------------------------------------------------------------------------------------------------------------------------------------------------------------------------------------------------------------------------------------------------------------------|
| 11. | Wheat | Leaf rust | China               | Agric Univ Hebei, Coll Plant Protect<br>Biol Control Ctr Plant Dis & Plant Pests Hebei Province<br>Natl Engineer Res Ctr Agricin No Mountainous Areas                                                  | Hu YY, Feng LN, Ji HL et al. 2011. SSR mapping of leaf rust resistance gene <i>LrY192</i> in <i>Aegilops tauschii</i> Y192. China Agr Sci 44(10): 2022-28.                                                                                                                                                   |
| 12. | Wheat | Leaf rust | Germany<br>Ethiopia | Univ Bonn: Inst Crop Sci & Resour Conservat: Phytomedicine; Crop Genet & Biotechnol, Germany<br>Debre Zeit Agric Res Ctr, Ethiopia<br>Max-Planck-Inst Plant Breed Res, Barley Genet Res Group, Germany | Mebrate SA, Oerke EC, Dehne HW, Pillen K. 2008. Mapping of the leaf rust resistance gene <i>Lr38</i> on wheat chromosome arm 6DL using SSR markers. Euphytica 162(3): 457-66.                                                                                                                                |
| 13. | Wheat | Leaf rust | Hungary             | Hungarian Acad Sci, Agricul Res Inst                                                                                                                                                                   | Vida G, Gál M, Uhrin A et al. 2009. Application of marker assisted selection in wheat breeding for leaf rust resistance. Növényvédelem 45(12): 668-75.                                                                                                                                                       |
| 14. | Wheat | Leaf rust | Hungary             | Hungarian Acad Sci, Agricul Res Inst                                                                                                                                                                   | Vida G, Gal M, Uhrin A et al. 2008. Molecular markers in the "real world": identification of resistance genes and marker assisted selection in wheat breeding for leaf rust resistance. Modern Variety Breeding For Present And Future Needs: Edings Of The 18th Eucarpia General Congress, Valencia, Spain. |
| 15. | Wheat | Leaf rust | Hungary             | Hungarian Acad Sci, Agricul Res Inst                                                                                                                                                                   | Uhrin A, Lang L, Bedo Z. 2008. Comparison of PCR-based DNA markers for using different <i>Lr19</i> and <i>Lr24</i> leaf rust resistance wheat sources. Cereal Res Commun 36(4): 533-41.                                                                                                                      |
| 16. | Wheat | Leaf rust | India               | Punjab Agricul Univ                                                                                                                                                                                    | Chhuneja P, Vikal Y, Kaur S et al. 2011. Marker-assisted pyramiding of leaf rust resistance genes <i>Lr24</i> and <i>Lr28</i> in wheat ( <i>Triticum aestivum</i> ). Indian J Agr Sci 81(3): 214-18.                                                                                                         |
| 17. | Wheat | Leaf rust | India               | Directorate of Wheat Res, Regional Stn                                                                                                                                                                 | Datta D, Prashar M, Bhardwaj SC. 2007. Validation and incorporation of leaf rust resistance genes <i>Lr9</i> , <i>Lr19</i> , <i>Lr24</i> and <i>Lr26</i> through molecular markers in wheat ( <i>Triticum aestivum</i> L.). Indian J Genet Pl Br 67(1): 7-11.                                                |
| 18. | Wheat | Leaf rust | India               | Charan Singh Univ, Dept Genet & Plant Breed, Mol Biol Lab<br>Indian Agrcul Res Inst, Div Genet                                                                                                         | Kumar J, Mir RR, Kumar N et al. 2010. Marker-assisted selection for pre-harvest sprouting tolerance and leaf rust resistance in bread wheat. Plant Breeding 129(6): 617-21.                                                                                                                                  |
| 19. | Wheat | Leaf rust | India               | Indian Agricul Res Inst, Div Genet<br>Natl Res Ctr Plant Biotechnol                                                                                                                                    | Bhawar KB, Vinod, Sharma JB et al. 2011. Molecular marker assisted pyramiding of leaf rust resistance genes <i>Lr19</i> and <i>Lr28</i> in bread wheat ( <i>Triticum aestivum</i> L.) variety HD2687. Indian J Genet Pl Br 71(4): 304-11.                                                                    |
| 20. | Wheat | Leaf rust | India               | Indian Agricul Res Inst, Natl Phytotron Facil, Div Genet                                                                                                                                               | Samsampour D, Zanjani BM, Singh A et al. 2009. Marker assisted selection to pyramid seedling resistance gene <i>Lr24</i> and adult plant resistance gene <i>Lr48</i> for leaf rust resistance in wheat. Indian J Genet Pl Br 69(1): 1-9.                                                                     |
| 21. | Wheat | Leaf rust | Italy               | Ist Sperimentale Cerealicoltura                                                                                                                                                                        | Nocente F, Gazza L, Pasquini M. 2007. Evaluation of leaf rust resistance genes <i>Lr1</i> , <i>Lr9</i> , <i>Lr24</i> , <i>Lr47</i> and their introgression into common wheat cultivars by marker-assisted selection. Euphytica 155(3): 329-36.                                                               |



|     |       |           |                                 |                                                                                                                                                                                                                 |                                                                                                                                                                                                                                                                                        |
|-----|-------|-----------|---------------------------------|-----------------------------------------------------------------------------------------------------------------------------------------------------------------------------------------------------------------|----------------------------------------------------------------------------------------------------------------------------------------------------------------------------------------------------------------------------------------------------------------------------------------|
| 22. | Wheat | Leaf rust | Switzerland                     | Agroscope Changins-Wadenswil Res Stn ACW, Plant Breed & Genet Resour<br>Agroscope Liebefeld-Posieux Res Stn ALP                                                                                                 | Moulet O, Fossati D, Mascher F et al. 2010. Use of marker-assisted selection (MAS) for pyramiding leaf rust resistance genes ( <i>Lr9</i> , <i>Lr24</i> , <i>Lr22a</i> ) in wheat. 60. Jahrestagung der Vereinigung der Pflanzenzüchter und Saatgutkaufleute Österreichs 2009. 143-46. |
| 23. | Wheat | Leaf rust | Syria                           | Aleppo Univ, Fac Agr<br>ICARDA                                                                                                                                                                                  | Kassem M, El-Ahmed A, Hakim MS et al. 2011. Identifying leaf rust resistance gene <i>Lr19</i> in durum wheat using simple sequence repeat (SSR) marker. Afr J Biotechnol 10(44): 8716-19.                                                                                              |
| 24. | Wheat | Leaf rust | USA                             | N Carolina State Univ: Dept Crop Sci; USDA-ARS, Regional Small Grains Genotyping Lab<br>Kansas State Univ, Deprt Plant Pathol, Wheat Genetic & Genomic Resour Ctr                                               | Kuraparthi V, Sood S, Guedira GB, Gill BS. 2011. Development of a PCR assay and marker-assisted transfer of leaf rust resistance gene <i>Lr58</i> into adapted winter wheats. Euphytica 180(2): 227-34.                                                                                |
| 25. | Wheat | Leaf rust | USA                             | Kansas State Univ, Dept Plant Pathol, Wheat Genet & Genom Resour Ctr<br>Montana State Univ, Dept Plant Sci & Plant Pathol                                                                                       | Gill BS, Huang L, Kuraparthi V et al. 2008. Alien genetic resources for wheat leaf rust resistance, cytogenetic transfer, and molecular analysis. Aust J Agr Res 59(3): 197-05.                                                                                                        |
| 26. | Wheat | Leaf rust | Canada<br>Switzerland<br>France | Agric & Agri-Food Canada, Cereal Res Ctr, Canada<br>Univ Zürich, Inst Plant Biol, Switzerland<br>Inst Natl Recherche Agronomique, Amélioration et Santé des Plantes, France                                     | Cloutier S, McCallum BD, Loutre C et al. 2007. Leaf rust resistance gene <i>Lr1</i> , isolated from bread wheat ( <i>Triticum aestivum</i> L.) is a member of the large psr567 gene family. Plant Mol Biol 65(1-2): 93-106.                                                            |
| 27. | Wheat | Leaf rust | Canada                          | Agric & Agri-Food Canada, Cereal Res Ctr                                                                                                                                                                        | Hiebert CW, Thomas JB, Somers DJ et al. 2007. Microsatellite mapping of adult-plant leaf rust resistance gene <i>Lr22a</i> in wheat. Theor Appl Genet 115(6): 877-84.                                                                                                                  |
| 28. | Wheat | Leaf rust | China<br>Switzerland            | CAS, Inst Genet & Developl Biol, State Key Lab Plant Cell & Chromosome Engineer, China<br>Graduate Univ CAS, China<br>Univ Zürich, Inst Plant Biol, Switzerland                                                 | Qiu JW, Schurch AC, Yahiaoui N et al. 2007. Physical mapping and identification of a candidate for the leaf rust resistance gene <i>Lr1</i> of wheat. Theor Appl Genet 115(2): 159-68.                                                                                                 |
| 29. | Wheat | Leaf rust | Australia<br>India              | Univ Sydney PBI-Cobbitty, Fac Agric, Food & Natural Resour, Australia<br>Univ Adelaide, School Agric, Food & Wine, Australia<br>Punjab Agricul Univ, Dept Plant Breed, Genet & Biotechnol, India                | Bansal UK, Hayden MJ, Venkata BP et al. 2008. Genetic mapping of adult plant leaf rust resistance genes <i>Lr48</i> and <i>Lr49</i> in common wheat. Theor Appl Genet 117(3): 307-12.                                                                                                  |
| 30. | Wheat | Leaf rust | Italy                           | Univ Bologna, Dept Agroenvironm & Technol<br>Società Produttori Sementi s.p.a.                                                                                                                                  | Maccaferri M, Mantovani P, Tuberosa R et al. 2008. A major QTL for durable leaf rust resistance widely exploited in durum wheat breeding programs maps on the distal region of chromosome arm 7BL. Theor Appl Genet 117(8): 1225-40.                                                   |
| 31. | Wheat | Leaf rust | Germany                         | Univ Bonn, Crop Genet & Biotechnol Unit, Inst Crop Sci & Resour Conservation<br>Max-Planck-Inst Plant Breed Res<br>Technical Univ Munich, Chair of Plant Breed<br>Federal Ctr Breed Res Cultivated Plants (BAZ) | Naz AA, Kunert A, Lind V et al. 2008. AB-QTL analysis in winter wheat: II. Genetic analysis of seedling and field resistance against leaf rust in a wheat advanced backcross population. Theor Appl Genet 116(8): 1095-04.                                                             |
| 32. | Wheat | Leaf rust | India                           | Punjab Agricul Univ, School Agricul Biotechnol                                                                                                                                                                  | Riar AK, Kaur S, Dhaliwal HS et al. 2012. Introgression of a leaf rust resistance gene from <i>Aegilops caudata</i> to bread wheat. J Genet 91(2): 155-61.                                                                                                                             |

|     |       |           |                              |                                                                                                                                                                                                                                                                     |                                                                                                                                                                                                                                                                                        |
|-----|-------|-----------|------------------------------|---------------------------------------------------------------------------------------------------------------------------------------------------------------------------------------------------------------------------------------------------------------------|----------------------------------------------------------------------------------------------------------------------------------------------------------------------------------------------------------------------------------------------------------------------------------------|
| 33. | Wheat | Leaf rust | China                        | Northwest A&F Univ, Coll Agron, Shaanxi Key Lab Genet Engineer Plant Breed                                                                                                                                                                                          | Du WL, Wang J, Wang LM et al. 2013. Development and characterization of a <i>Psathyrostachys huashanica</i> Keng 7Ns chromosome addition line with leaf rust resistance. PLoS One 8(8): e70879.                                                                                        |
| 34. | Wheat | Leaf rust | China                        | Agricul Univ Hebei, Biologic Control Ctr Plant Dis & Plant Pests Hebei, Dept Plant Pathol, Coll Plant Protect<br>Zhoukou Acad Agricul Sci<br>CAAS: Inst Crop Sci, Natl Wheat Improv Ctr/The Natl Key Facility Crop Gene Resour & Genetic Improv<br>CIMMYT China Off | Zhao XL, Zheng TC., Xia XC et al. 2008. Molecular mapping of leaf rust resistance gene <i>LrZH84</i> in chinese wheat line Zhou 8425B. Theor Appl Genet 117 (7): 1069-75.                                                                                                              |
| 35. | Wheat | Leaf rust | USA                          | N Dakota State Univ, Dept Plant Scis<br>USDA-ARS: Northern Crop Sci Lab; Cereal Dis Lab                                                                                                                                                                             | Chu CG, Friesen TL, Xu SS et al. 2009. Identification of novel QTLs for seedling and adult plant leaf rust resistance in a wheat doubled haploid population. Theor Appl Genet 119(2): 263-69.                                                                                          |
| 36. | Wheat | Leaf rust | USA                          | USDA-ARS, Cereal Dis Lab                                                                                                                                                                                                                                            | Ordenez ME, Kolmer JA. 2009. Differentiation of molecular genotypes and virulence phenotypes of <i>Puccinia triticina</i> from common wheat in North America. Phytopathology 99 (6): 750-58.                                                                                           |
| 37. | Wheat | Leaf rust | USA<br>China                 | Oklahoma State Univ: Dept Plant & Soil Sci; Dept Entomol & Plant Pathol, USA<br>Yangzhu Univ, Agricul Coll, China                                                                                                                                                   | Cao S, Carver BF, Zhu X et al. 2010. A single-nucleotide polymorphism that accounts for allelic variation in the <i>Lr34</i> gene and leaf rust reaction in hard winter wheat. Theor Appl Genet 121(2): 385-92.                                                                        |
| 38. | Wheat | Leaf rust | Canada                       | Agric & Agri-Food Canada, Cereal Res Ctr<br>Univ Manitoba, Dept Plant Sci                                                                                                                                                                                           | Dakouri A, McCallum BD, Walichnowski AZ et al. 2010. Fine-mapping of the leaf rust <i>Lr34</i> locus in <i>Triticum aestivum</i> (L.) and characterization of large germplasm collections support the ABC transporter as essential for gene function. Theor Appl Genet 121(2): 373-84. |
| 39. | Wheat | Leaf rust | Canada<br>USA                | Agric & Agri-Food Canada: Plant Gene Resour Canada, Saskatoon Res Ctr; Cereal Res Ctr, Canada<br>Montana State Univ, Dept Plant Sci & Plant Pathol, USA                                                                                                             | Fu YB, Peterson GW, McCallum BD et al. 2010. Population-based resequencing analysis of improved wheat germplasm at wheat leaf rust resistance locus <i>Lr21</i> . Theor Appl Genet 121(2): 271-81.                                                                                     |
| 40. | Wheat | Leaf rust | India                        | Agharkar Res Inst, Genet & Plant Breed Group<br>Directorate Wheat Res, Regional Stn                                                                                                                                                                                 | Bipinraj A, Honrao B, Prashar M et al. 2011. Validation and identification of molecular markers linked to the leaf rust resistance gene <i>Lr28</i> in wheat. J Appl Genet 52(2): 171-75.                                                                                              |
| 41. | Wheat | Leaf rust | Ukraine                      | Ukrainian Acad Agricul Sci: Inst Plant Protect; Plant Breed & Genet Inst, Natl Ctr Seed & Cultivar Investigation; Remeslo Inst Wheat,<br>Ukrainian Natl Acad Sci, Inst Food Biotechno & Genom                                                                       | Karelov AV, Pirkov I V, Kozub NA et al. 2011. Identification of allelic state of leaf rust-resistance <i>Lr34</i> gene in the cultivars of soft winter wheat of ukrainian breeding. Tsitol Genet 45(5): 3-10.                                                                          |
| 42. | Wheat | Leaf rust | Russia                       | Russian Acad Sci, Siberian Branch: Inst Cytol & Genet; Siberian Inst Plant Growing & Breed                                                                                                                                                                          | Adonina, IG, Petrash NV, Timonova EM et al. 2012. Construction and study of leaf rust-resistant common wheat lines with translocations of <i>Aegilops speltoides</i> Tausch. genetic material. Russ J Genet 48(4): 404-09.                                                             |
| 43. | Wheat | Leaf rust | Mexico<br>China<br>Australia | CIMMYT, Mexico<br>Campo Experim Valle Mexico INIFAP, Mexico<br>CIMMYT China Off, China<br>CSIRO Plant Ind, Australia                                                                                                                                                | Herrera-Foessel SA, Singh RP, Huerta-Espino J et al. 2012. <i>Lr68</i> : A new gene conferring slow rusting resistance to leaf rust in wheat. Theor Appl Genet 124(8): 1475-86.                                                                                                        |

|     |       |           |                                          |                                                                                                                                                                                                                                        |                                                                                                                                                                                                                                                              |
|-----|-------|-----------|------------------------------------------|----------------------------------------------------------------------------------------------------------------------------------------------------------------------------------------------------------------------------------------|--------------------------------------------------------------------------------------------------------------------------------------------------------------------------------------------------------------------------------------------------------------|
| 44. | Wheat | Leaf rust | India                                    | Indian Agricul Res Inst: Natl Phytotron Facility; Division of Genet<br>Guru Gobind Singh Indraprastha Univ, Univ School Biotechnol                                                                                                     | Singh A, Pallavi JK, Gupta P, Prabhu KV. 2012. Identification of microsatellite markers linked to leaf rust resistance gene <i>Lr25</i> in wheat. <i>J Appl Genet</i> 53(1): 19-25.                                                                          |
| 45. | Wheat | Leaf rust | Canada                                   | Agric & Agri-Food Canada, Cereal Res Ctr<br>Univ Manitoba, Dept Plant Sci                                                                                                                                                              | Dakouri A, McCallum BD, Radovanovic N, Cloutier S 2013. Molecular and phenotypic characterization of seedling and adult plant leaf rust resistance in a world wheat collection. <i>Mo Breeding</i> 32(3): 663-77.                                            |
| 46. | Wheat | Leaf rust | China<br>USA                             | Hebei Acad Agricul & Forestry Sci, Inst Millet Crops, China<br>Kansas State Univ, Dep Agron, USA<br>USDA-ARS, Hard Winter Wheat Genet Res Unit, USA                                                                                    | Liu ZL, Bowden RL, Bai GH. 2013. Molecular markers for leaf rust resistance gene <i>Lr42</i> in wheat. <i>Crop Sci</i> 53(4): 1566-70.                                                                                                                       |
| 47. | Wheat | Leaf rust | Italy<br>USA<br>Czech Republic<br>Mexico | Univ Bologna, Dept Agricul Sci (DipSA), Italy<br>N Dakota State Univ, Dept Plant Sci, USA<br>Società Produttori Sementi Bologna, Italy<br>Inst Experim Botany, Czech Republic<br>CIMMYT, Mexico<br>USDA-ARS, Cereal Dis Lab, USA       | Terracciano I, Maccaferri M, Bassi F et al. 2013. Development of COS-SNP and HRM markers for high-throughput and reliable haplotype-based detection of <i>Lr14a</i> in durum wheat ( <i>Triticum durum</i> Desf.). <i>Theor Appl Genet</i> 126(4): 1077-101. |
| 48. | Wheat | Leaf rust | China                                    | Hebei AgriculUniv, Dept Plant Pathol, Coll Plant Protect, Biol Control Ctr<br>Plant Dis & Plant Pests Hebei<br>CAAS, Inst Crop Sci, Natl Wheat Improv Ctr, Natl Key Facil Crop Gene Resour & Genet Improv<br>CIMMYTChina Off, c/o CAAS | Zhou H X, Xia XC, He ZH et al. 2013. Molecular mapping of leaf rust resistance gene <i>LrNJ97</i> in chinese wheat line Neijiang 977671. <i>Theor Appl Genet</i> 126(8): 2141-47.                                                                            |
| 49. | Wheat | Leaf rust | China                                    | Biologic Control Ctr Plant Dis & Plant Pests of Hebei, Agricul Univ Hebei, Dept Plant Pathol, Coll Plant Protect<br>CAAS, Inst Crop Sci, Natl Wheat Improv Ctr<br>CIMMYT China Off                                                     | Zhou Y, Xia X, He Z et al. 2013. Fine mapping of leaf rust resistance gene <i>Lrzh84</i> using expressed sequence tag and sequence-tagged site markers, and allelism with other genes on wheat chromosome 1B. <i>Phytopathology</i> 103(2): 169-74.          |
| 50. | Wheat | Leaf rust | Uruguay<br>USA                           | Natl Inst AgriculRes La Estanzuela, Uruguay<br>USDA-ARS, Cereal Dis Lab, USA                                                                                                                                                           | Germán SE, Kolmer JA. 2014. Leaf rust resistance in selected late maturity, common wheat cultivars from Uruguay. <i>Euphytica</i> 195(1): 57-67.                                                                                                             |
| 51. | Wheat | Leaf rust | Russia<br>Germany                        | Russian Acad Sci, Siberian Branch, Inst Cytol & Genet, Russia<br>Leibniz Inst Plant Genet & Crop Plant Res (IPK), Germany                                                                                                              | Timonova EM, Leonova IN, Röder MS, Salina EA. 2013. Marker-assisted development and characterization of a set of <i>Triticum aestivum</i> lines carrying different introgressions from the <i>T. timopheevii</i> genome. <i>Mol Breeding</i> 31(1): 123-36.  |
| 52. | Wheat | Leaf rust | USA<br>India                             | Kansas State Univ: Dept Plant Pathol, Wheat Genet & Genom Resources Ctr; USDA-ARS, Plant Sci & Entomol Res Unit, USA<br>Punjab Agr Univ, Dept Plant Breeding Genet & Biotechnol, India<br>Indian Inst Technol, Dept Biotechnol, India  | Kuraparthi V, Sood S, Chhuneja P et al. 2007. A cryptic wheat- <i>Aegilops triuncialis</i> translocation with leaf rust resistance gene <i>Lr58</i> . <i>Crop Sci</i> 47(5): 1995-2003.                                                                      |
| 53. | Wheat | Leaf rust | Russia<br>Germany                        | Inst Cytol & Genet, Russia<br>Nordsaat Saatzeitgesellschaft MBH, Germany<br>Leibniz Inst Plant Genet & Crop Plant Res (IPK), Germany                                                                                                   | Leonova IN, Laikova LI., Popova OM et al. 2007. Detection of quantitative trait loci for leaf rust resistance in wheat— <i>T. timopheevii</i> / <i>T. tauschii</i> introgression lines. <i>Euphytica</i> 155(1-2): 79-86.                                    |

|     |       |           |                              |                                                                                                                                                                                                                          |                                                                                                                                                                                                                                                                                |
|-----|-------|-----------|------------------------------|--------------------------------------------------------------------------------------------------------------------------------------------------------------------------------------------------------------------------|--------------------------------------------------------------------------------------------------------------------------------------------------------------------------------------------------------------------------------------------------------------------------------|
| 54. | Wheat | Leaf rust | Russia<br>Germany            | Russian Acad Sci, Siberian Branch, Inst Cytol & Genet, Russia<br>Leibniz Inst Plant Genet & Crop Plant Res, Germany                                                                                                      | Leonova IN, Roder MS, Kalinina NP, Budashkina EB. 2008. Genetic analysis and localization of loci controlling leaf rust resistance of <i>Triticum aestivum</i> x <i>Triticum timopheevii</i> introgression lines. Russ J Genet 44(12): 1431-37.                                |
| 55. | Wheat | Leaf rust | Russia<br>Germany            | Russian Acad Sci, Inst Cytol & Genet, Russia<br>JKI, Inst Plant Protect Field Crops & Grassland, Fed Res Ctr Cultivated Plants, Germany                                                                                  | Leonova IN, Budashkina EB, Flath K et al. 2010. Microsatellite mapping of a leaf rust resistance gene transferred to common wheat from <i>Triticum timopheevii</i> . Cereal Res Commun 38(2): 211-19.                                                                          |
| 56. | Wheat | Leaf rust | Japan<br>Switzerland         | Yokohama City Univ, Kihara Inst Biol Res, Japan<br>Univ Zürich, Inst Plant Biol, Switzerland<br>Meiji Univ, Bioinformat Lab, Fac Agr, Japan<br>Natl Inst Genet, Genome Biol Lab, Japan.                                  | Manickavelu A, Kawaura K, Oishi K et al. 2010. Comparative gene expression analysis of susceptible and resistant near-isogenic lines in common wheat infected by <i>Puccinia triticina</i> . DNA Res 17(4): 211-22.                                                            |
| 57. | Wheat | Leaf rust | Russia                       | Russian Acad Agricul Sci: All-Russia Scientific Inst Plant Protect; Vavilov Res Inst Plant Ind<br>Siberian Branch of RAS, Inst Cytol & Genet                                                                             | Gulyaeva EI, Orina AS, Gannibal PB et al. 2014. The Effectiveness of molecular markers for the identification of <i>Lr28</i> , <i>Lr35</i> , and <i>Lr47</i> genes in common wheat. Russ J Genetics 50(2): 131-39.                                                             |
| 58. | Wheat | Leaf rust | Russia                       | Agric Res Inst Central Non-Chernozem Zone<br>All-Russian Inst Phytopathol, Bol'shie Vyazemy                                                                                                                              | Gainullin NR, Lapochkina IF, Zhemchuzhina AI et al. 2007. Phytopathological and molecular genetic identification of leaf rust resistance genes in common wheat accessions with alien genetic material. Russ J Genet 43(8): 875-81.                                             |
| 59. | Wheat | Leaf rust | Mexico<br>Australia          | Dept Forest Mycol & Pathol, Swedish Univ Agricul Sci (SLU), Sweden<br>CIMMYT, Mexico<br>Campo Experim Valle Mexico INIFAP, Mexico<br>CSIRO, Plant Ind, Australia                                                         | Herrera-Foessel SA, Singh RP, Huerta-Espino J et al. 2007. Identification and mapping of <i>Lr3</i> and a linked leaf rust resistance gene in durum wheat. Crop Sci 47(4): 1459-66.                                                                                            |
| 60. | Wheat | Leaf rust | Argentina                    | CICVyA INTA, Inst Genet EA Favret<br>EE INTA Marcos Juárez                                                                                                                                                               | Ingala L, Saione H, Helguera M et al. 2007. Inheritance of adult plant resistance genes and associated markers from a durable resistant cultivar to leaf rust. In: Buck HT et al. (eds.): Wheat Production in Stressed Environments. Developments in Plant Breeding 12: 59-63. |
| 61. | Wheat | Leaf rust | Pakistan                     | Univ Agr Faisalabad, Dept Plant Breeding & Genet                                                                                                                                                                         | Malik TA, Iqbal A, Chowdhry MA et al. 2007. DNA marker for leaf rust disease in wheat. Pak J Bot 39(1): 239-43.                                                                                                                                                                |
| 62. | Wheat | Leaf rust | Australia                    | Univ Sydney, Plant Breed Inst Cobbitty                                                                                                                                                                                   | Singh D, Park RF, McIntosh RA. 2007. Characterisation of wheat leaf rust resistance gene <i>Lr34</i> in Australian wheats using components of resistance and the linked molecular marker csLV34. Aust J Agr Res 58(11): 1106-14.                                               |
| 63. | Wheat | Leaf rust | Germany<br>Hungary<br>Poland | Polish Acad Sci, Inst Plant Genet, Poland<br>Fed Ctr Breeding Res Cultivated Plants, Inst Epidemiol & Resistance Resour, Germany<br>Polonia Univ, Lab Populat Genet, Poland<br>Hungarian Acad Sci, Agr Res Inst, Hungary | Blaszczyk L, Kramer I, Ordon F et al. 2008. Validity of selected DNA markers for breeding leaf rust resistant wheat. Cereal Res Commun 36(2): 201-13.                                                                                                                          |
| 64. | Wheat | Leaf rust | USA                          | USDA-ARS: Plant Sci & Entomol Unit; Cereal Crops Res Unit<br>Kansas State Univ, Dept Plant Pathol                                                                                                                        | Bremenkamp-Barrett B, Faris JD, Fellers JP. 2008. Molecular mapping of the leaf rust resistance gene <i>Lr17a</i> in wheat. Crop Sci 48(3): 1124-28.                                                                                                                           |

|     |       |           |                                  |                                                                                                                                                                                                                                                   |                                                                                                                                                                                                                                                   |
|-----|-------|-----------|----------------------------------|---------------------------------------------------------------------------------------------------------------------------------------------------------------------------------------------------------------------------------------------------|---------------------------------------------------------------------------------------------------------------------------------------------------------------------------------------------------------------------------------------------------|
| 65. | Wheat | Leaf rust | Brazil                           | Univ Fed Rio Grande do Sul, Programa Posgrad Biol Celular & Mol, Ctr Biotecnol Rio Grande Sul<br>Pioneer Sementes Ltda, Ctr Pesquisa Passo Fundo<br>Univ Fed Rio Grande do Sul, Dept Plantas Lavoura<br>Embrapa Trigo                             | Da Silva PR, Milach SCK, Sortica VD et al. 2008. Validation of molecular markers associated to leaf rust resistance genes in wheat. Pesquisa Agropecuaria Brasileira 43(10): 1357-63.                                                             |
| 66. | Wheat | Leaf rust | Sweden<br>Mexico                 | Swedish Univ Agr Sci, SLU, Dept Forest Mycol & Pathol, Sweden<br>CIMMYT, Mexico<br>Campo Experim Valle Mexico INIFAP, Mexico                                                                                                                      | Herrera-Foessel SA, Singh RP, Huerta-Espino J et al. 2008. Molecular mapping of a leaf rust resistance gene on the short arm of chromosome 6B of durum wheat. Plant Dis 92(12): 1650-54.                                                          |
| 67. | Wheat | Leaf rust | Canada                           | Agric & Agri-Food Canada, Cereal Res Ctr                                                                                                                                                                                                          | Hiebert CW, Thomas JB, McCallum BD et al. 2008. Genetic mapping of the wheat leaf rust resistance gene <i>Lr60</i> ( <i>LrW2</i> ). Crop Sci 48(3): 1020-26.                                                                                      |
| 68. | Wheat | Leaf rust | Hungary                          | Cereal Res Non Profit Co                                                                                                                                                                                                                          | Tar M, Purnhauser L, Csozsz M. 2008. Identification and localization of molecular markers linked to the <i>Lr52</i> leaf rust resistance gene of wheat. Cereal Res Commun 36(3): 409-15.                                                          |
| 69. | Wheat | Leaf rust | Czech Republic                   | Res Inst Crop Prod                                                                                                                                                                                                                                | Hanzalova A, Sumikova T, Bartos P. 2009. Determination of leaf rust resistance genes <i>Lr10</i> , <i>Lr26</i> and <i>Lr37</i> by molecular markers in wheat cultivars registered in the Czech Republic . Czech J Genet Plant Breed 45(2): 79-84. |
| 70. | Wheat | Leaf rust | Italy<br>Spain<br>Egypt          | CRA Cereal Res Ctr SS, Italy<br>CSIC, Inst Sustainable Agr, Spain<br>IFAPA CICE, CIFA Alameda Obispo, Spain<br>Kafr El Sheikh Univ, Dept Agr Bot, Egypt<br>Univ Bari, Dept Environm & Agroforestry Biol & Chem, Italy<br>CRA Genom Res Ctr, Italy | Marone D, Del Olmo AI, Laido G et al. 2009. Genetic analysis of durable resistance against leaf rust in durum wheat. Mol Breeding 24(1): 25-39.                                                                                                   |
| 71. | Wheat | Leaf rust | Australia<br>UK<br>Kenya         | Univ Sydney, Plant Breed Inst Cobbitty, Australia<br>JIC, UK<br>CIMMYT Nairobi, Kenya                                                                                                                                                             | Singh D, Simmonds J, Park RF et al. 2009. Inheritance and QTL mapping of leaf rust resistance in the European winter wheat cultivar 'Beaver'. Euphytica 169(2): 253-61.                                                                           |
| 72. | Wheat | Leaf rust | USA                              | Kansas State Univ: Dept Agron; USDA-ARS, Plant Sci & Entomol Res Unit<br>Oklahoma State Univ, Dept Plant & Soil Sci                                                                                                                               | Sun XC, Bai GH, Carver B. 2009. Molecular markers for wheat leaf rust resistance gene <i>Lr41</i> . Mol Breeding 23(2): 311-21.                                                                                                                   |
| 73. | Wheat | Leaf rust | Hungary<br>UK<br>China           | Hungarian Acad Sci, Agr Res Inst, Hungary<br>Univ Dundee, SCRI, UK<br>Northwest A&F Univ, China                                                                                                                                                   | Vida G, Gal M, Uhrin A et al. 2009. Molecular markers for the identification of resistance genes and marker-assisted selection in breeding wheat for leaf rust resistance. Euphytica 170(1-2): 67-76.                                             |
| 74. | Wheat | Leaf rust | USA                              | USDA-ARS, Cereal Dis Lab<br>Univ Minnesota: Dept Agron & Plant Genet; Dept Plant Pathol                                                                                                                                                           | Kolmer JA, Anderson JA, Flor JM. 2010. Chromosome location, linkage with simple sequence repeat markers, and leaf rust resistance conditioned by gene <i>Lr63</i> in wheat. Crop Sci 50(6): 2392-95.                                              |
| 75. | Wheat | Leaf rust | Italy<br>Mexico<br>USA<br>Poland | Univ Bologna, Dept Agroenvironm Sci & Technol, Italy<br>Società Produttori Sementi Bologna, Italy<br>CIMMYT, Mexico<br>USDA-ARS, Cereal Dis Lab, USA                                                                                              | Maccaferri M, Sanguineti MC, Mantovani P et al. 2010. Association mapping of leaf rust response in durum wheat. Mol Breeding 26(2): 189-228.                                                                                                      |

|     |       |           |               |                                                                                                                                                                                                                                                                |                                                                                                                                                                                                                                                                                                                                                         |
|-----|-------|-----------|---------------|----------------------------------------------------------------------------------------------------------------------------------------------------------------------------------------------------------------------------------------------------------------|---------------------------------------------------------------------------------------------------------------------------------------------------------------------------------------------------------------------------------------------------------------------------------------------------------------------------------------------------------|
|     |       |           | Israel        | IHAR, Dept Genet & Plant Breeding, Poland<br>Tel Aviv Univ, Dept Plant Sci, Israel                                                                                                                                                                             |                                                                                                                                                                                                                                                                                                                                                         |
| 76. | Wheat | Leaf rust | India<br>Iran | Indian Agr Res Inst, Natl Phytotron Facil, Div Genet, India<br>Zanjan Univ, Fac Agr, Iran                                                                                                                                                                      | Samsampour D, Zanjani BM, Pallavi JK et al. 2010. Identification of molecular markers linked to adult plant leaf rust resistance gene <i>Lr48</i> in wheat and detection of <i>Lr48</i> in the Thatcher near-isogenic line with gene <i>Lr25</i> . Euphytica 174(3): 337-42.                                                                            |
| 77. | Wheat | Leaf rust | USA           | USDA-ARS, Hard Winter Wheat Genet Res Unit<br>Kansas State Univ, Dep Agron<br>Oklahoma State Univ, Dep Plant & Soil Sci                                                                                                                                        | Sun XC., Bai GH, Carver BF, Bowden R. 2010. Molecular mapping of wheat leaf rust resistance gene <i>Lr42</i> . Crop Sci 50(1): 59-66.                                                                                                                                                                                                                   |
| 78. | Wheat | Leaf rust | Canada        | Agric & Agri-Food Canada: Res Branch, Cereal Res Ctr; Res Branch, Semiarid Prairie Agr Res Ctr                                                                                                                                                                 | Thomas J., Nilmalgoda S, Hiebert C et al. 2010. Genetic markers and leaf rust resistance of the wheat gene <i>Lr32</i> . Crop Sci 50(6): 2310-17.                                                                                                                                                                                                       |
| 79. | Wheat | Leaf rust | Turkey        | Ege Univ, Fac Agr, Dept Field Crops                                                                                                                                                                                                                            | Tonk, F. A. and Yüce, S. (2010). A preliminary study for identification of candidate AFLP markers for leaf rust resistance gene <i>Lr13</i> by using near-isogenic lines of spring wheat cv. Thatcher. Turkish J Field Crops 15(1): 34-39.                                                                                                              |
| 80. | Wheat | Leaf rust | China         | China Agr Univ: State Key Lab Agrobiotechnol; Coll Agron & Biotechnol; Key Lab Crop Genom & Genet Improvement, Minist Agr; Beijing Key Lab Crop Genet Improv, Minist Agr; Key Lab Crop Heterosis Res & Utilizat, Minist Educ<br>Dezhou Univ, Dept Biologic Sci | Wang YJ, Peng HR, Liu G et al. 2010. Identification and molecular mapping of a leaf rust resistance gene in spelt wheat landrace Altgold. Euphytica 174(3): 371-75.                                                                                                                                                                                     |
| 81. | Wheat | Leaf rust | Germany       | JKI, Inst Resistance Res & Stress Tolerance, Fed Res Ctr Cultivated Plants                                                                                                                                                                                     | Serfling A, Kramer I, Lind V et al. 2011. Diagnostic value of molecular markers for <i>Lr</i> genes and characterization of leaf rust resistance of German winter wheat cultivars with regard to the stability of vertical resistance. Eur J Plant Pathol 130(4): 559-75.                                                                               |
| 82. | Wheat | Leaf rust | India         | Indian Agr Res Inst, Natl Phytotron Facil<br>Guru Gobind Singh Indraprastha Univ, Univ Sch Biotechnol                                                                                                                                                          | Singh A, Pallavi JK, Gupta P, Prabhu KV. 2011. Identification of microsatellite markers linked to leaf rust adult plant resistance (APR) gene <i>Lr48</i> in wheat. Plant Breeding 130(1): 31-34.                                                                                                                                                       |
| 83. | Wheat | Leaf rust | USA           | Kansas State Univ: Dept Plant Pathol; USDA-ARS Hard Winter Wheat Genet Res Unit                                                                                                                                                                                | Singh S, Bowden RL. 2011. Molecular mapping of adult-plant race-specific leaf rust resistance gene <i>Lr12</i> in bread wheat. Mol Breeding 28(2): 137-42.                                                                                                                                                                                              |
| 84. | Wheat | Leaf rust | Argentina     | INTA EEA Marcos Juarez: Grp Biotecnol & Recursos Genet; Grp Mejoramiento Trigo<br>INTA EEA Bordenave, Area Fitopatol                                                                                                                                           | Vanzetti LS, Campos P, Demichelis M et al. 2011. Identification of leaf rust resistance genes in selected Argentinean bread wheat cultivars by gene postulation and molecular markers. Electronic Journal of Biotechnology 14(3): <a href="http://dx.doi.org/10.2225/vol14-issue3-fulltext-14">http://dx.doi.org/10.2225/vol14-issue3-fulltext-14</a> . |
| 85. | Wheat | Leaf rust | China         | Hebei Agr Univ, Dept Plant Pathol, Coll Plant Protect, Biol Control Ctr Plant Dis & Plant Pests Hebei<br>CAAS, Inst Crop Sci, Natl Wheat Improvement Ctr, Natl Key Facil Crop Gene Resources & Genet Improv<br>CIMMYT China Off                                | Zhang H, Xia XC, He ZH et al. 2011. Molecular mapping of leaf rust resistance gene <i>LrBi16</i> in Chinese wheat cultivar Bimai 16. Mol Breeding 28 (4): 527-34.                                                                                                                                                                                       |

|     |       |           |                      |                                                                                                                                                                                                                                             |                                                                                                                                                                                                                                              |
|-----|-------|-----------|----------------------|---------------------------------------------------------------------------------------------------------------------------------------------------------------------------------------------------------------------------------------------|----------------------------------------------------------------------------------------------------------------------------------------------------------------------------------------------------------------------------------------------|
| 86. | Wheat | Leaf rust | Brasil               | Univ Estadual Centro Oeste, Dept Ciencias Biol, Lab Genet & Biol Mol Vegetal<br>EMBRAPA Trigo, Ctr Nacl Pesquisa Trigo<br>Univ Fed Rio Grande do Sul<br>Pioneer Sementes Ltda, Ctr Pesquisa Passo Fundo<br>OR Melhoramento de Sementes Ltda | Da-Silva PR, Brammer SP, Guerra D et al. 2012. Monosomic and molecular mapping of adult plant leaf rust resistance genes in the Brazilian wheat cultivar Toropi. Genet Mol Res 11(3): 2823-34.                                               |
| 87. | Wheat | Leaf rust | India                | Sher E Kashmir Univ Agr Sci & Technol Kashmir, Fac Agr<br>Cent Univ Punjab, Sch Biosci                                                                                                                                                      | Khan MA, Kamaluddin, Saini RG. 2012. Chromosomal location of non-hypersensitive leaf rust resistance genes in bread wheat cultivar PBW65 using microsatellite markers. Indian J Biotechnol 11(4): 412-15.                                    |
| 88. | Wheat | Leaf rust | Germany<br>Australia | Bavarian State Res Ctr Agr, Inst Crop Sci & Plant Breeding, Germany<br>Univ Sydney, Plant Breeding Inst, Australia<br>Praxis Humangenetik & Prävention, Germany                                                                             | Mohler V, Singh D, Singrün C, Park RF. 2012. Characterization and mapping of <i>Lr65</i> in spelt wheat 'Altgold Rotkorn'. Plant Breeding 131(2): 252-257.                                                                                   |
| 89. | Wheat | Leaf rust | Pakistan             | Quaid-i-Azam Univ: Dept Plant Sci; Dept Biotechnol                                                                                                                                                                                          | Rasheed A, Mumtaz AS, Shinwari ZK. 2012. Genetic characterization of novel <i>Lr</i> gene stack in spring wheat variety Chakwal86 and its effectiveness against leaf rust in rain fed areas of Pakistan. Pak J Bot 44(2): 507-10.            |
| 90. | Wheat | Leaf rust | Canada               | Agric & Agri-Food Canada: Semiarid Prairie Agr Res Ctr; Cereal Res Ctr<br>Univ Saskatchewan, Dept Plant Sci<br>Lethbridge Res Ctr                                                                                                           | Singh A, Pandey MP, Singh AK et al. 2012. Molecular mapping of leaf rust and stripe rust resistance QTL in durum wheat. Can J Plant Sci 92(3): 606. (                                                                                        |
| 91. | Wheat | Leaf rust | Hungary              | Hungarian Acad Sci, Agr Res Inst                                                                                                                                                                                                            | Uhrin A, Szakacs E, Lang L et al. 2012. Molecular cytogenetic characterization and SSR marker analysis of a leaf rust resistant wheat line carrying a 6G(6B) substitution from <i>Triticum timopheevii</i> (Zhuk.). Euphytica 186(1): 45-55. |
| 92. | Wheat | Leaf rust | India<br>Australia   | Natl Chem Lab, PMB Unit, Div Biochem Sci, India<br>Univ Sydney, Plant Breed Inst Cobbitty, Fac Agr & Environm, Australia<br>Punjab Agr Univ, Dept Plant Breed Genet & Biotechnol, India.                                                    | Dholakia BB, Rajwade AV, Hosmani P et al. 2013. Molecular mapping of leaf rust resistance gene <i>Lr15</i> in hexaploid wheat. Mol Breeding 31(3): 743-47.                                                                                   |
| 93. | Wheat | Leaf rust | USA                  | N Carolina State Univ, Dept Crop Sci, Raleigh,<br>USDA-ARS<br>Montana State Univ, Dept Plant Sci & Plant Pathol                                                                                                                             | Neelam K, Brown-Guedira G, Huang L. 2013. Development and validation of a breeder-friendly KASPar marker for wheat leaf rust resistance locus <i>Lr21</i> . Mol Breeding 31(1): 233-37.                                                      |
| 94. | Wheat | Leaf rust | USA<br>Australia     | Univ Minnesota, Dept Plant Pathol, USA<br>Divers Arrays P L, Australia                                                                                                                                                                      | Olivera PD, Kilian A, Wenzl P, Steffenson BJ. 2013. Development of a genetic linkage map for Sharon goatgrass ( <i>Aegilops sharonensis</i> ) and mapping of a leaf rust resistance gene. Genome 56(7): 367-76.                              |
| 95. | Wheat | Leaf rust | China                | Agr Univ Hebei, Coll Plant Protect, Biol Control Ctr Plant Dis & Plant Pest Hebei, Dept Plant Pathol                                                                                                                                        | Shi LH, Zhang N, Hu YY et al. 2013. Postulation of leaf rust resistance genes in seven Chinese spring wheat cultivars. J Integr Agric 12(9): 1580-88.                                                                                        |
| 96. | Wheat | Leaf rust | Australia<br>Germany | Univ Sydney, Plant Breed Inst, Australia<br>Bavarian State Res Ctr Agr, Inst Crop Sci & Plant Breed, Germany                                                                                                                                | Singh D, Mohler V, Park RF. 2013. Discovery, characterisation and mapping of wheat leaf rust resistance gene <i>Lr71</i> . Euphytica 190(1): 131-36.                                                                                         |
| 97. | Wheat | Leaf rust | Argentina            | CICVyA INTA, Inst Genèt EA Favret, Argentina                                                                                                                                                                                                | Dieguez MJ, Pergolesi MF, Velasquez SM et al. 2014. Fine mapping of <i>LrSV2</i> , a race-specific adult plant leaf rust resistance gene on wheat                                                                                            |

|      |       |           |                           |                                                                                                                                                                                                                                                                                                                                                        |                                                                                                                                                                                                                                               |
|------|-------|-----------|---------------------------|--------------------------------------------------------------------------------------------------------------------------------------------------------------------------------------------------------------------------------------------------------------------------------------------------------------------------------------------------------|-----------------------------------------------------------------------------------------------------------------------------------------------------------------------------------------------------------------------------------------------|
|      |       |           | France                    | Lab Fisiol Biol Mol IFIByNE (CONICET) FCEyN-UBA, Argentina<br>INRA UMR Genet, Diversity & Ecophysiol Cereals, France                                                                                                                                                                                                                                   | chromosome 3BS. Theor Appl Genet 127(5): 1133-41.                                                                                                                                                                                             |
| 98.  | Wheat | Leaf rust | Egypt<br>Saudi Arabia     | Agr Res Ctr, Plant Pathol Res Inst, Egypt<br>King Saud Univ, Dept Bot & Microbiol, Coll Sci, Saudi Arabia                                                                                                                                                                                                                                              | Imbaby IA, Mahmoud MA, Hassan MEM, Abd-El-Aziz ARM. 2014. Identification of leaf rust resistance genes in selected Egyptian wheat cultivars by molecular markers. Scientific World Journal 2014 : Article ID 574285.                          |
| 99.  | Wheat | Leaf rust | China                     | NW A&F, Coll Agron                                                                                                                                                                                                                                                                                                                                     | Pang Y, Chen X, Zhao J et al. 2014. Molecular cytogenetic characterization of a wheat - <i>Leymus mollis</i> 3D(3Ns) substitution line with resistance to leaf rust. J Genet Genomics 41(4): 205-14.                                          |
| 100. | Wheat | Leaf rust | South Africa<br>USA       | ARC-Small Grain Inst, Germplasm Development, South Africa<br>Univ Minnesota: USDA-ARS , Cereal Disease Lab; Agron & Plant Genet, USA                                                                                                                                                                                                                   | Tsilo TJ, Kolmer J, Anderson JA. 2014. Molecular mapping and improvement of leaf rust resistance in wheat breeding lines. Phytopathology. in press.                                                                                           |
| 101. | Wheat | Leaf rust | China                     | Agr Univ Hebei, Biol Control Ctr Plant Dis & Plant Pests Hebei, Coll Plant Protect, Dept Plant Pathol<br>CAAS: Natl Wheat Improvement Ctr, Inst Crop Sci; Inst Plant Protect, State Key Lab Biol Plant Dis & Insect Pest<br>CIMMYT China Off                                                                                                           | Xing LF, Wang CF, Xia XC et al. 2014. Molecular mapping of leaf rust resistance gene <i>LrFun</i> in Romanian wheat line Fundulea 900. Mol Breeding 33(4): 931-37.                                                                            |
| 102. | Wheat | Stem rust | Australia<br>USA          | CSIRO Plant Ind, Australia<br>Univ Sydney, Plant Breed Inst Cobbitty, Australia<br>Univ Calif Davis, Dept Plant Sci, USA                                                                                                                                                                                                                               | Periyannan S, Bansal U., Bariana H et al. 2014. Identification of a robust molecular marker for the detection of the stem rust resistance gene <i>Sr45</i> in common wheat. Theor Appl Genet 127(4): 947-55.                                  |
| 103. | Wheat | Stem rust | USA<br>China              | Kansas State Univ: Wheat Genet & Genom Resour Ctr; Dept Plant Pathol, Throckmorton Plant Sci Ctr, USA<br>USDA-ARS, No Crop Sci Lab, USA<br>Northwest A&F Univ, Coll Agron, China                                                                                                                                                                       | Liu C, Qi LL, Liu WX et al. 2011. Development of a set of compensating <i>Triticum aestivum</i> - <i>Dasypyrum villosum</i> Robertsonian translocation lines. Genome 54(10): 836-44.                                                          |
| 104. | Wheat | Stem rust | Australia<br>USA<br>China | Commonwealth Scientific & Industrial Res Organization (CSIRO) Plant Ind, Australia<br>Univ Sydney, Plant Breed Inst, Australia<br>Univ California, Dept Plant Sci, USA<br>Montana State Univ, Dept Plant Sci & Plant Pathol, USA<br>CAAS, Inst Crop Sci, China<br>Northwest A&F Univ, State Key Lab Crop Stress Biol Arid Areas & Coll Life Sci, China | Periyannan S, Moore J, Ayliffe M et al. 2013. The gene <i>Sr33</i> , an ortholog of barley <i>Mla</i> genes, encodes resistance to wheat stem rust race Ug99. Science 341(6147): 786-88.                                                      |
| 105. | Wheat | Stem rust | USA                       | Kansas State Univ , Dept of Plant Pathology<br>Univ California, Dept Plant Sci<br>ASDA-ARS, Cereal Dis Lab                                                                                                                                                                                                                                             | Saintenac C, Zhang W, Salcedo A et al. 2013. Identification of wheat gene <i>Sr35</i> that confers resistance to Ug99 stem rust race group. Science 341 (6147): 783-86.                                                                       |
| 106. | Wheat | Stem rust | USA                       | Kansas State Univ: Dept Plant Pathol; Dept Agron<br>USDA-ARS, Cereal Dis Lab<br>Univ Minnesota<br>Washington State Univ, Dept Crop & Soil Sci                                                                                                                                                                                                          | Olson EL, Rouse MN, Pumphrey M O et al. 2013. Simultaneous transfer, introgression, and genomic localization of genes for resistance to stem rust race TTKSK (Ug99) from <i>Aegilops tauschii</i> to wheat. Theor Appl Genet 126(5): 1179-88. |



USDA-ARS, Hard Winter Wheat Genet Res Unit

|            |           |                  |                                                                                                                                                                                                                                                                                                          |                                                                                                                                                                                                                                                                          |
|------------|-----------|------------------|----------------------------------------------------------------------------------------------------------------------------------------------------------------------------------------------------------------------------------------------------------------------------------------------------------|--------------------------------------------------------------------------------------------------------------------------------------------------------------------------------------------------------------------------------------------------------------------------|
| 107. Wheat | Stem rust | USA              | Kansas State Univ: Dept Plant Pathol; USDA-ARS, Hard Winter Wheat Genet Res Unit<br>USDA-ARS, Cereal Dis Lab<br>N Carolina State Univ, USDA-ARS, Plant Sci Res Unit                                                                                                                                      | Bernardo AN, Bowden R L, Rouse MN et al. 2013. Validation of molecular markers for new stem rust resistance genes in U.S. hard winter wheat. <i>Crop Sci</i> 53(3): 755-64.                                                                                              |
| 108. Wheat | Stem rust | USA              | USDA-ARS, No Crop Sci Lab<br>N Dakota State Univ, Dept Plant Sci<br>USDA-ARS, Cereal Dis Lab                                                                                                                                                                                                             | Klindworth DL, Niu ZX, Chao SM et al. 2012. Introgression and characterization of a goatgrass gene for a high level of resistance to ug99 stem rust in tetraploid wheat. <i>G3: Genes, Genomes, Genetics</i> 2(6): 665-73.                                               |
| 109. Wheat | Stem rust | USA<br>Australia | USDA-ARS, No Crop Sci Lab, USA<br>Kansas State Univ: Dept Plant Pathol, Wheat Genet & Genom Resour Ctr; USDA-ARS, Hard Winter Wheat Genet Res Unit, USA<br>Washington State Univ, Dept Crop & Soil Sci, USA<br>Univ Sydney, Plant Breed Inst, Australia<br>Univ Minnesota, USDA-ARS, Cereal Dis Lab, USA | Qi LL, Pumphrey MO, Friebe B et al. 2011. A novel Robertsonian translocation event leads to transfer of a stem rust resistance gene ( <i>Sr52</i> ) effective against race Ug99 from <i>Dasypyrum villosum</i> into bread wheat. <i>Theor Appl Genet</i> 123(1): 159-67. |
| 110. Wheat | Stem rust | Australia<br>USA | Univ Sydney, Plant Breed Inst Cobbitty, Australia<br>CSIRO Plant Ind, Australia<br>Washington State Univ, Dept Crop & Soil Sci, USA                                                                                                                                                                      | Periyannan SK, Bansal UK., Bariana HS et al. (2011. A robust molecular marker for the detection of shortened introgressed segment carrying the stem rust resistance gene <i>Sr22</i> in common wheat. <i>Theor Appl Genet</i> 122(1): 1-7.                               |
| 111. Wheat | Stem rust | USA              | USDA-ARS, No Crop Sci Lab<br>Univ Minnesota, USDA-ARS, Dept Agric, Cereal Dis Lab<br>N Dakota State Univ, Dept Plant Sci                                                                                                                                                                                 | Niu ZX, Klindworth DL, Friesen TL et al. 2011. Targeted introgression of a wheat stem rust resistance gene by DNA marker-assisted chromosome engineering. <i>Genetics</i> 187(4): 1011—21.                                                                               |
| 112. Wheat | Stem rust | USA              | Kansas State Univ, Wheat Genet & Genom Resour Ctr, Dept Plant Pathol, Throckmorton Plant Sci Ctr<br>USDA-ARS, Hard Winter Wheat Genet Res Unit<br>Washington State Univ, Dept Crop & Soil Sci, Spring Wheat Breed & Genet<br>Univ Minnesota, USDA-ARS, Cereal Dis Lab                                    | Liu WX, Jin Y, Rouse M et al. 2011. Development and characterization of wheat- <i>Ae. searsii</i> Robertsonian translocations and a recombinant chromosome conferring resistance to stem rust. <i>Theor Appl Genet</i> 122(8): 1537-45.                                  |
| 113. Wheat | Stem rust | USA<br>Canada    | USDA-ARS, Cereal Crops Res Unit, State Univ Stn, USA<br>N Dakota State Univ: Dept Entomol; Dept Plant Sci; Dept Plant Pathol, USA<br>Agric & Agri-Food Canada SPARC, Canada<br>Univ Minnesota, USDA-ARS, Cereal Dis Lab, USA                                                                             | Yu GT, Zhang QJ, Klindworth DL et al. 2010. Molecular and cytogenetic characterization of wheat introgression lines carrying the stem rust resistance gene <i>Sr39</i> . <i>Crop Sci</i> 50(4): 1393-1400.                                                               |
| 114. Wheat | Stem rust | USA              | N Carolina State Univ: USDA-ARS Plant Sci Res; Dept Crop Sci<br>Kansas State Univ: Dept Plant Pathol; USDA-ARS Plant Sci & Entomol Res, Dept Plant Pathol<br>Univ Minnesota: USDA-ARS, Cereal Dis Lab; Dept Plant Pathol                                                                                 | Olson EL, Brown-Guedira G, Marshall D et al. 2010. Development of wheat lines having a small introgressed segment carrying stem rust resistance gene <i>Sr22</i> . <i>Crop Sci</i> 50 (5): 1823-30.                                                                      |

|            |           |                                 |                                                                                                                                                                                                                                           |                                                                                                                                                                                                                                                                    |
|------------|-----------|---------------------------------|-------------------------------------------------------------------------------------------------------------------------------------------------------------------------------------------------------------------------------------------|--------------------------------------------------------------------------------------------------------------------------------------------------------------------------------------------------------------------------------------------------------------------|
| 115. Wheat | Stem rust | Australia<br>Switzerland        | Univ Sydney, Fac Agric Food & Nat Resour, Plant Breed Inst Cobbitty, Australia<br>Univ Zürich, Inst Plant Biol, Switzerland                                                                                                               | Bansal UK, Bossolini E, Miah H et al. 2008. Genetic mapping of seedling and adult plant stem rust resistance in two European winter wheat cultivars. <i>Euphytica</i> 164(3): 821-28.                                                                              |
| 116. Wheat | Stem rust | Mexico<br>Kenya                 | CIMMYT, Mexico<br>CIMMYT, Kenya<br>INIFAP CEVAMEX, Mexico<br>CINVESTAV IPN, Mexico                                                                                                                                                        | Singh S, Singh RP, Bhavani S et al. 2013. QTL mapping of slow-rusting, adult plant resistance to race Ug99 of stem rust fungus in PBW343/Muu RIL population. <i>Theor Appl Genet</i> 126(5): 1367-75.                                                              |
| 117. Wheat | Stem rust | Kenya<br>Mexico<br>Switzerland  | Kenyan Agricul Res Inst,, Kenya<br>CIMMYT, Mexico<br>Campo Experim Valle Mexico INIFAP, Mexico<br>Univ Zürich, Inst Plant Biol, Switzerland                                                                                               | Njau PN, Bhavani S, Huerta-Espino J et al. 2013. Identification of QTL associated with durable adult plant resistance to stem rust race Ug99 in wheat cultivar 'Pavon 76'. <i>Euphytica</i> 190(1): 33-44.                                                         |
| 118. Wheat | Stem rust | Iran                            | Seed & Plant Improv Inst, Cereals Res Dept                                                                                                                                                                                                | Mohammadi M, Torkamaneh D, Patpour M. 2013. Seedling stage resistance of Iranian bread wheat germplasm to race Ug99 of <i>Puccinia graminis</i> f. sp <i>tritici</i> . <i>Plant Dis</i> 97(3): 387-92.                                                             |
| 119. Wheat | Stem rust | USA                             | Kansas State Univ: Dept Plant Pathol, Wheat Genet & Genom Resour Ctr, Throckmorton Plant Sci Ctr; USDA-ARS,Throckmorton Plant Sci Ctr, Hard Winter Wheat Genet Res Unit<br>Univ Minnesota, USDA-ARS, Cereal Dis Lab                       | Liu WX, Danilova TV, Rouse MN et al. 2013. Development and characterization of a compensating wheat- <i>Thinopyrum intermedium</i> Robertsonian translocation with <i>Sr44</i> resistance to stem rust (Ug99). <i>Theor Appl Genet</i> 126(5): 1167-77.            |
| 120. Wheat | Stem rust | Italy<br>Ethiopia<br>Mexico     | Univ Bologna, Dept Agricul Sci, Italy<br>Sinana Agricul Res Ctr, Ethiopia<br>Debre Zeit Agricul Res Ctr, Ethiopia<br>CIMMYT, Mexico                                                                                                       | Letta T, Maccaferri M, Badebo A et al. 2013. Searching for novel sources of field resistance to Ug99 and Ethiopian stem rust races in durum wheat via association mapping. <i>Theor Appl Genet</i> 126(5): 1237-56.                                                |
| 121. Wheat | Stem rust | Germany<br>Ethiopia<br>Mexico   | Leibniz Inst Plant Genet & Crop Plant Res IPK, Germany<br>Univ Kassel, Dept Agrobiodivers, Inst Crop Sci, Germany<br>Debre Zeit Agricul Res Ctr, Ethiopian Inst Agricul Res, Ethiopia<br>CIMMYT, Mexico                                   | Haile JK, Hammer K, Badebo A et al. 2013. Haplotype analysis of molecular markers linked to stem rust resistance genes in Ethiopian improved durum wheat varieties and tetraploid wheat landraces. <i>Genet Resour Crop Evol</i> 60(3): 853-64.                    |
| 122. Wheat | Stem rust | Germany<br>Ethiopia<br>Syria    | Leibniz Inst Plant Genet & Crop Plant Res IPK, Germany<br>Univ Kassel, Dept Agrobiodivers, Inst Crop Sci, Germany<br>Debre Zeit Agricul Res Ctr, Ethiopian Inst Agricul Res, Ethiopia<br>ICARDA BIGM, ICARDA, Durum Improv Program, Syria | Haile JK, Hammer K, Badebo A et al. 2013. Genetic diversity assessment of Ethiopian tetraploid wheat landraces and improved durum wheat varieties using microsatellites and markers linked with stem rust resistance. <i>Genet Resour Crop Evol</i> 60(2): 513-27. |
| 123. Wheat | Stem rust | Iran<br>Canada                  | Minist Jahad Agric, Cereal Res Dept, Seed & Plant Improv Inst, AREEO, Iran<br>Agric & Agri-Food Canada, Cereal Res Ctr, Canada                                                                                                            | Ghazvini H, Hiebert CW, Thomas JB, Fetch T. 2013. Development of a multiple bulked segregant analysis (MBSA) method used to locate a new stem rust resistance gene ( <i>Sr54</i> ) in the winter wheat cultivar Norin 40. <i>Theor Appl Genet</i> 126(2): 443-49.  |
| 124. Wheat | Stem rust | USA<br>Mexico<br>Kenya<br>India | Cornell Univ, Dept Plant Breed & Genet, USA<br>CIMMYT, Mexico<br>Kenya Agricul Res Inst, Kenya<br>Directorate Wheat Res, India                                                                                                            | Yu LX, Morgounov A, Wanyera R et al. 2012. Identification of Ug99 stem rust resistance loci in winter wheat germplasm using genome-wide association analysis. <i>Theor Appl Genet</i> 125(4): 749-58.                                                              |

|            |           |                               |                                                                                                                                                                                                                                           |                                                                                                                                                                                                                                     |
|------------|-----------|-------------------------------|-------------------------------------------------------------------------------------------------------------------------------------------------------------------------------------------------------------------------------------------|-------------------------------------------------------------------------------------------------------------------------------------------------------------------------------------------------------------------------------------|
| 125. Wheat | Stem rust | USA                           | USDA-ARS, Cereal Dis Lab<br>Univ Minnesota: Dept Plant Pathol; Dept Agron & Plant Genet<br>USDA-ARS, Biosci Res Lab                                                                                                                       | Rouse MN, Nava IC, Chao SM et al. 2012. Identification of markers linked to the race Ug99 effective stem rust resistance gene <i>Sr28</i> in wheat ( <i>Triticum aestivum</i> L.). <i>Theor Appl Genet</i> 125(5): 877-85.          |
| 126. Wheat | Stem rust | South Africa<br>USA           | Univ Free State, Dept Plant Sci, South Africa<br>Univ Minnesota, USDA-ARS, Cereal Dis Lab, USA<br>CenGen, South Africa                                                                                                                    | Pretorius ZA, Jin Y, Bender CM et al. 2012. Seedling resistance to stem rust race Ug99 and marker analysis for <i>Sr2</i> , <i>Sr24</i> and <i>Sr31</i> in South African wheat cultivars and lines. <i>Euphytica</i> 186(1): 15-23. |
| 127. Wheat | Stem rust | Germany<br>Syria<br>Ethiopia  | Leibniz Inst Plant Genet & Crop Plant Res IPK, Germany<br>ICARDA BIGM, ICARDA, Durum Improv Program, Syria<br>Univ Kassel, Inst Crop Sci, Dept Agrobiodivers, Germany<br>Debre Zeit Agricul Res Ctr, Ethiopian Inst Agricul Res, Ethiopia | Haile JK, Nachit MM, Hammer K et al. 2012. QTL mapping of resistance to race Ug99 of <i>Puccinia graminis</i> f. sp. <i>tritici</i> in durum wheat ( <i>Triticum durum</i> Desf.). <i>Mol Breeding</i> 30(3): 1479-93.              |
| 128. Wheat | Stem rust | Canada<br>USA<br>South Africa | Agric & Agri-Food Canada, Cereal Res Ctr, Canada<br>Univ Minnesota: Dept Agron & Plant Genet; USDA-ARS, Cereal Dis Lab, USA<br>USDA-ARS, Natl Ctr Cool & Cold Water Aquacul, USA<br>Small Grain Inst, Agricul Res Council, South Africa   | Ghazvini H, Hiebert CW, Zegeye T et al. 2012. Inheritance of resistance to Ug99 stem rust in wheat cultivar Norin 40 and genetic mapping of <i>Sr42</i> . <i>Theor Appl Genet</i> 125(4): 817-24.                                   |
| 129. Wheat | Stem rust | Canada                        | Agric & Agri-Food Canada, Cereal Res Ctr                                                                                                                                                                                                  | Ghazvini H, Hiebert CW, Thomas J et al. 2012. Linkage maps of two new stem rust resistance genes on chromosomes 2b and 6a of wheat line Tr129. <i>Can J Plant Sci</i> 92(3): 602-03.                                                |
| 130. Wheat | Stem rust | Pakistan                      | NARC: PARC Inst Adv Studies Agric, Dept Plant Genom & Biotechnol;<br>Crop Dis Res Programme                                                                                                                                               | Ejaz M, Iqbal M, Shahzad A et al. 2012. Genetic variation for markers linked to stem rust resistance genes in Pakistani wheat varieties. <i>Crop Sci</i> 52(6): 2638-48.                                                            |
| 131. Wheat | Stem rust | Australia<br>India<br>Kenya   | Univ Sydney, Fac Agric & Environm, Dept Plant & Food Sci, Plant Breed<br>Inst Cobbitty, Australia<br>Natl Chem Lab, India<br>CIMMYT, Kenya<br>Natl Plant Breed Res Ctr, Kenya Agricul Res Inst, Kenya                                     | Bansal UK, Zwart R, Bhavani S et al. 2012. Microsatellite mapping identifies TTKSK-effective stem rust resistance gene in wheat cultivars VL404 and Janz. <i>Mol Breeding</i> 30(4): 1757-65.                                       |
| 132. Wheat | Stem rust | USA<br>Mexico                 | Cornell Univ, Dept Plant Breed & Genet, USA<br>Univ Nebraska-Lincoln, Dept Agron & Hort, USA<br>CIMMYT, Mexico<br>Campo Expt Valle Mexico INIFAP, Mexico                                                                                  | Yu LX, Lorenz A, Rutkoski J et al. 2011. Association mapping and gene-gene interaction for stem rust resistance in CIMMYT spring wheat germplasm. <i>Theor Appl Genet</i> 123(8): 1257-68.                                          |
| 133. Wheat | Stem rust | USA                           | USDA-ARS, Biosci Res Lab<br>Univ Calif Davis, Dept Plant Sci<br>Univ Minnesota: Dept Plant Pathol; USDA-ARS, Cereal Dis Lab<br>N Dakota State Univ, Dept Plants Sci                                                                       | Simons K, Abate Z, Chao SM et al. 2011. Genetic mapping of stem rust resistance gene <i>Sr13</i> in tetraploid wheat ( <i>Triticum turgidum</i> ssp. <i>durum</i> L.). <i>Theor Appl Genet</i> 122(3): 649-58.                      |
| 134. Wheat | Stem rust | USA                           | Cornell Univ, Dept Plant Breed & Genet, Ithaca                                                                                                                                                                                            | Rutkoski JE, Heffner EL, Sorrells ME. 2011. Genomic selection for durable stem rust resistance in wheat. <i>Euphytica</i> 179(1): 161-73.                                                                                           |

|            |           |                            |                                                                                                                                                                                                                       |                                                                                                                                                                                                                                                                                                     |
|------------|-----------|----------------------------|-----------------------------------------------------------------------------------------------------------------------------------------------------------------------------------------------------------------------|-----------------------------------------------------------------------------------------------------------------------------------------------------------------------------------------------------------------------------------------------------------------------------------------------------|
| 135. Wheat | Stem rust | Hungary                    | Cereal Res Non Profit Ltd. Co<br>Hungarian Acad Sci, Agricul Res Inst                                                                                                                                                 | Purnhauser L, Bona L, Lang L. 2011. Identification of <i>Sr31</i> and <i>Sr36</i> stem rust resistance genes in wheat cultivars registered in Hungary. Cereal Res Commun 39(1): 53-66.                                                                                                              |
| 136. Wheat | Stem rust | Italy                      | CRA Res Unit Cereal Qual Improv                                                                                                                                                                                       | Nocente F, Sereni L, Matere A, Pasquini M. 2011. Recent occurrence of <i>Puccinia graminis</i> f. sp. <i>tritici</i> in Italy: Pathogen virulence composition and seedling resistance of durum and common wheat. Cereal Res Commun 39(1): 77-87.                                                    |
| 137. Wheat | Stem rust | Australia                  | CSIRO Plant Ind                                                                                                                                                                                                       | Mago R, Lawrence GJ, Ellis JG. 2011. The application of DNA marker and doubled-haploid technology for stacking multiple stem rust resistance genes in wheat. Mol Breeding 27(3): 329-35.                                                                                                            |
| 138. Wheat | Stem rust | Australia<br>Mexico<br>USA | CSIRO Plant Ind, Australia<br>Murdoch Univ, Ctr Comparat Genom, Australia<br>CIMMYT Apdo, Mexico<br>N Carolina State Univ, USDA-ARS, Eastern Reg Genotyping Lab, USA<br>Univ Minnesota, USDA-ARS, Cereal Dis Lab, USA | Mago R, Brown-Guedira G, Dreisigacker S et al. 2011. An accurate DNA marker assay for stem rust resistance gene <i>Sr2</i> in wheat. Theor Appl Genet 122(4): 735-44.                                                                                                                               |
| 139. Wheat | Stem rust | USA                        | Kansas State Univ, Dept Plant Pathol, Wheat Genet & Genom Resour Ctr<br>Washington State Univ, Dept Crop & Soil Sci<br>Univ Minnesota, USDA-ARS Cereal Dis Lab                                                        | Liu WX, Rouse M, Friebe B et al. 2011. Discovery and molecular mapping of a new gene conferring resistance to stem rust, <i>Sr53</i> , derived from <i>Aegilops geniculata</i> and characterization of spontaneous translocation stocks with reduced alien chromatin. Chromosome Res 19(5): 669-82. |
| 140. Wheat | Stem rust | USA                        | USDA-ARS: Cereal Dis Lab; Plant Sci Res Unit                                                                                                                                                                          | Kolmer JA, Garvin DF, Jin Y. 2011. Expression of a thatcher wheat adult plant stem rust resistance QTL on chromosome arm 2BL is enhanced by <i>Lr34</i> . Crop Sci 51(2): 526-33.                                                                                                                   |
| 141. Wheat | Stem rust | USA                        | USDA-ARS, No Crop Sci Lab                                                                                                                                                                                             | Klindworth DL, Miller JD, Williams ND et al. 2011. Resistance to recombinant stem rust race TPPKC in hard red spring wheat. Theor Appl Genet 123(4): 603-13.                                                                                                                                        |
| 142. Wheat | Stem rust | Kazakhstan<br>Turkey       | Inst Plant Biol & Biotechnol, Lab Plant Breed & Genet, Kazakhstan<br>CIMMYT Turkey, Turkey<br>Inst Problems Biol Safety, Lab Plant Immun, Kazakhstan                                                                  | Kokhmetova A, Morgounov A., Rsaliev S et al. 2011. Wheat germplasm screening for stem rust resistance using conventional and molecular techniques. Czech J Genet Plant Breed 47: S146-S154.                                                                                                         |
| 143. Wheat | Stem rust | Canada<br>Kenya            | Agric & Agri-Food Canada, Cereal Res Ctr, Canada<br>Vineland Res & Innovat Ctr, Vineland Stn, Canada<br>CIMMYT, Kenya<br>Univ Saskatchewan, Dept Plant Sci, Canada                                                    | Hiebert CW, Fetch TG, Zegeye T et al. 2011. Genetics and mapping of seedling resistance to Ug99 stem rust in Canadian wheat cultivars 'Peace' and 'AC Cadillac'. Theor Appl Genet 122(1): 143-49.                                                                                                   |
| 144. Wheat | Stem rust | Ethiopia<br>Germany        | Ethiopian Inst Agricul Res, Plant Protect Res Ctr, Ethiopia<br>JKI, Fed Res Inst Cultivated Plants JKI, Inst Resistance Res & Stress Tolerance, Germany<br>Univ Giessen, Inst Crop Sci & Plant Breed 1, Germany       | Admassu B, Perovic D, Friedt W et al. 2011. Genetic mapping of the stem rust ( <i>Puccinia graminis</i> f. sp. <i>tritici</i> Eriks. & E. Henn) resistance gene <i>Sr13</i> in wheat ( <i>Triticum aestivum</i> L.). Theor Appl Genet 122(3): 643-48.                                               |
| 145. Wheat | Stem rust | USA                        | Univ Calif Davis, Dep Plant Sci<br>Kansas State Univ, Dept Plant Pathol<br>Univ Minnesota: Dep Plant Pathol; USDA-ARS, Cereal Dis Lab                                                                                 | Zhang WJ, Olson E, Saintenac C et al. 2010. Genetic maps of stem rust resistance gene <i>Sr35</i> in diploid and hexaploid wheat. Crop Sci 50(6): 2464-74.                                                                                                                                          |

Washington State Univ, Dep. Crop & Soil Sci

|            |           |                        |                                                                                                                                                                                                                                                                                     |                                                                                                                                                                                                                        |
|------------|-----------|------------------------|-------------------------------------------------------------------------------------------------------------------------------------------------------------------------------------------------------------------------------------------------------------------------------------|------------------------------------------------------------------------------------------------------------------------------------------------------------------------------------------------------------------------|
| 146. Wheat | Stem rust | USA<br>Mexico<br>China | Cornell Univ, Dept Plant Breed & Genet, USA<br>Univ Minnesota, Dept Agron & Plant Genet, USA<br>CIMMYT, Mexico<br>USDA-ARS, Cereal Dis Lab, USA<br>Univ Calif Davis, Dept Plant Sci, USA<br>USDA-ARS Plant Sci Res, USA<br>CAAS, China<br>Campo Experim Valle Mexico INIFAP, Mexico | Yu LX, Liu SX, Anderson JA et al. 2010. Haplotype diversity of stem rust resistance loci in uncharacterized wheat lines. Mol Breeding 26(4): 667-80.                                                                   |
| 147. Wheat | Stem rust | USA                    | Univ Minnesota: Dep Agron & Plant Genet; USDA-ARS, Cereal Dis Lab                                                                                                                                                                                                                   | Tsilo TJ, Jin Y, Anderson JA. 2010. Identification of flanking markers for the stem rust resistance gene <i>Sr6</i> in wheat. Crop Sci 50(5): 1967-70.                                                                 |
| 148. Wheat | Stem rust | USA                    | N Carolina State Univ: Dep Crop Sci; USDA-ARS Plant Sci Res, Dep Crop Sci; USDA-ARS Plant Sci Res, Dep Plant Pathol; Dep of Plant Sci<br>USDA-ARS, Cereal Dis Lab<br>N Dakota State Univ, Dep Plant Sci<br>Univ Calif Davis, Dep Plant Sci                                          | Olson EL, Brown-Guedira G, Marshall DS et al. 2010. Genotyping of U.S. wheat germplasm for presence of stem rust resistance genes <i>Sr24</i> , <i>Sr36</i> and <i>SR1RS<sup>amigo</sup></i> . Crop Sci 50(2): 668-75. |
| 149. Wheat | Stem rust | India                  | Indian Agricul Res Inst, Div Genet                                                                                                                                                                                                                                                  | Mallick N, Vinod, Sharma JB et al. 2010. Genetics of stem rust resistance in common wheat genotypes WR95 and selection T3336. Indian J Genet Pl Br 70 (2): 109-113.                                                    |
| 150. Wheat | Stem rust | USA<br>Mexico          | Univ Minnesota: Dept Agron & Plant Genet; USDA-ARS, Cereal Dis Lab, USA<br>Cornell Univ, Dept Plant Breed & Genet, USA<br>CIMMYT, Mexico                                                                                                                                            | Liu SX, Yu LX, Singh RP et al. 2010. Diagnostic and co-dominant PCR markers for wheat stem rust resistance genes <i>Sr25</i> and <i>Sr26</i> . Theor Appl Genet 120(4): 691-97.                                        |
| 151. Wheat | Stem rust | Canada                 | Agric & Agri-Food Canada, Cereal Res Ctr                                                                                                                                                                                                                                            | Hiebert CW, Fetch TG, Zegeye T. 2010. Genetics and mapping of stem rust resistance to Ug99 in the wheat cultivar Webster. Theor Appl Genet 121(1): 65-69.                                                              |
| 152. Wheat | Stem rust | Ethiopia<br>Germany    | Plant Protect Res Ctr, Ethiopian Inst Agricul Res, Ethiopia<br>JKI, Inst Resistance Res & Stress Tolerance, Fed Res Inst Cultivated Plants, Germany<br>Justus Liebig Univ, Inst Crop Sci & Plant Breed 1, Germany                                                                   | Admassu B, Friedt W, Ordon F. 2010. Genetic characterization of <i>Puccinia graminis</i> f.sp <i>tritici</i> populations from Ethiopia by SSRs. J Phytopathol 158(11-12): 806-12.                                      |
| 153. Wheat | Stem rust | USA                    | Kansas State Univ, Dep Agron<br>USDA-ARS, Plant Sci & Entomol Res Unit                                                                                                                                                                                                              | Wu SY, Pumphrey M, Bai GH. 2009. Molecular mapping of stem-rust-resistance gene <i>Sr40</i> in wheat. Crop Sci 49(5): 1681-86.                                                                                         |
| 154. Wheat | Stem rust | USA                    | Univ Minnesota: Dept Agron & Plant Genet; USDA-ARS, Cereal Dis Lab<br>USDA-ARS, Biosci Res Lab                                                                                                                                                                                      | Tsilo TJ, Chao S, Jin Y et al. 2009. Identification and validation of SSR markers linked to the stem rust resistance gene <i>Sr6</i> on the short arm of chromosome 2D in wheat. Theor Appl Genet 118(3): 515-24.      |

|            |           |                                         |                                                                                                                                                                                                                                                                                                                                                                                             |                                                                                                                                                                                                                                                              |
|------------|-----------|-----------------------------------------|---------------------------------------------------------------------------------------------------------------------------------------------------------------------------------------------------------------------------------------------------------------------------------------------------------------------------------------------------------------------------------------------|--------------------------------------------------------------------------------------------------------------------------------------------------------------------------------------------------------------------------------------------------------------|
| 155. Wheat | Stem rust | Australia                               | CSIRO Plant Ind<br>Univ Sydney, Plant Breed Inst<br>Univ Adelaide, Sch Agric Food & Wine                                                                                                                                                                                                                                                                                                    | Mago R, Zhang P, Bariana HS et al. 2009. Development of wheat lines carrying stem rust resistance gene <i>Sr39</i> with reduced <i>Aegilops speltoides</i> chromatin and simple PCR markers for marker-assisted selection. Theor Appl Genet 119(8): 1441-50. |
| 156. Wheat | Stem rust | USA                                     | S Dakota State Univ: Dept Plant Sci; Dept Biol & Microbiol<br>Texas A&M Univ, Dept Soil & Crop Sci, Coll Stn                                                                                                                                                                                                                                                                                | Babiker E, Ibrahim AMH, Yen Y, Stein J. 2009. Identification of a microsatellite marker associated with stem rust resistance gene <i>Sr35</i> in wheat. Aust J Crop Sci 3(4): 195-200.                                                                       |
| 157. Wheat | Stem rust | USA                                     | Univ Minnesota: USDA-ARS, Cereal Dis Lab; Dept Plant Pathol; USDA-ARS, Plant Sci Res Unit                                                                                                                                                                                                                                                                                                   | Vanegas CDG., Garvin DF, Kolmer JA. 2008. Genetics of stem rust resistance in the spring wheat cultivar Thatcher and the enhancement of stem rust resistance by <i>Lr34</i> . Euphytica 159(3): 391-401.                                                     |
| 158. Wheat | Stem rust | USA                                     | Univ Minnesota: Dept Agron & Plant Genet; USDA-ARS, Cereal Dis Lab                                                                                                                                                                                                                                                                                                                          | Tsilo TJ, Jin Y, Anderson JA. 2008. Diagnostic microsatellite markers for the detection of stem rust resistance gene <i>Sr36</i> in diverse genetic backgrounds of wheat. Crop Sci 48(1): 253-61.                                                            |
| 159. Wheat | Stem rust | Australia France<br>China               | Murdoch Univ: WA State Agricul Biotechnol Ctr; Ctr Comparat Genom, Australia<br>Univ Queensland, CSIRO Plant Ind, Australia<br>Dept Agric & Food Western Australia, Australia<br>INRA, Genet, Diversity & Ecophysiol of Cereals, France<br>Mol Plant Breed CRC, Australia<br>CAAS, Inst Crop Germplasm, China                                                                               | McNeil MD, Kota R, Paux E et al. 2008. Bac-derived markers for assaying the stem rust resistance gene, <i>Sr2</i> , in wheat breeding programs. Mol Breeding 22(1): 15-24.                                                                                   |
| 160. Wheat | Stem rust | USA<br>South Africa<br>Mexico<br>Canada | Univ Minnesota, USDA-ARS, Cereal Dis Lab, USA<br>Univ Orange Free State, Dept Plant Sci, South Africa<br>CIMMYT, Mexico<br>Agric & Agri-Food Canada, Cereal Res Ctr, Canada                                                                                                                                                                                                                 | Jin Y, Szabo LJ, Pretorius ZA et al. 2008. Detection of virulence to resistance gene <i>Sr24</i> within race TTKS of <i>Puccinia graminis</i> f. sp <i>tritici</i> . Plant Dis 92(6): 923-26.                                                                |
| 161. Wheat | Stem rust | USA                                     | USDA-ARS, Cereal Crops Res Unit, Red River Valley Agr Res Ctr<br>USDA-ARS, No Crop Sci Lab<br>N Dakota State Univ, Dept Plant Sci<br>Univ Minnesota, USDA-ARS, Cereal Dis Lab                                                                                                                                                                                                               | Faris JD, Xu SS, Cai XW et al. 2008. Molecular and cytogenetic characterization of a durum wheat- <i>Aegilops speltoides</i> chromosome translocation conferring resistance to stem rust. Chromosome Res 16(8): 1097-05.                                     |
| 162. Wheat | Stem rust | USA                                     | Univ Minnesota: Dept Agron & Plant Genet; USDA-ARS, Cereal Dis Lab                                                                                                                                                                                                                                                                                                                          | Tsilo TJ, Jin Y, Anderson JA. 2007. Microsatellite markers linked to stem rust resistance allele <i>Sr9a</i> in wheat. Cr op Sci 47(5): 2013-20.                                                                                                             |
| 163. Wheat | Stem rust | Indonesia<br>Australia<br>Iran          | Univ Mataram, Fac Agr, Indonesia<br>Univ Adelaide, Sch Agr Food & Wine, Australia<br>Mol Plant Breed Cooperat Res Ctr, Australia<br>Univ Sydney, Plant Breed Inst, Australia<br>Tarbiat Modares Univ, Dept Plant Breed, Fac Agr, Iran<br>Murdoch Univ, State Agr Biotechnol Ctr, Australia<br>Dept Agr & Food Western Australia, Australia<br>Value Added Wheat Cooperat Res Ctr, Australia | Anugrahwati DR, Shepherd KW, Verlin DC et al. 2008. Isolation of wheat-rye 1RS recombinants that break the linkage between the stem rust resistance gene <i>SrR</i> and secalin. Genome 51(5): 341-49.                                                       |

|            |             |                              |                                                                                                                                                                                                                                                                                     |                                                                                                                                                                                                                                                       |
|------------|-------------|------------------------------|-------------------------------------------------------------------------------------------------------------------------------------------------------------------------------------------------------------------------------------------------------------------------------------|-------------------------------------------------------------------------------------------------------------------------------------------------------------------------------------------------------------------------------------------------------|
| 164. Wheat | Stem rust   | USA                          | Kansas State Univ, Dept Plant Pathol<br>Univ Minnesota, USDA-ARS, Cereal Dis Lab<br>Washington State Univ, Dept Crop & Soil Sci<br>USDA-ARS, Hard Winter Wheat Genet Res Unit<br>Kansas State Univ, Dept Agron                                                                      | Olson EL, Rouse MN, Pumphrey MO et al. 2013. Introgression of stem rust resistance genes <i>SrTA10187</i> and <i>SrTA10171</i> from <i>Aegilops tauschii</i> to wheat. Theor Appl Genet 126(10): 2477-84.                                             |
| 165. Wheat | Stem rust   | Australia<br>USA             | CSIRO Plant Ind, Australia<br>Univ Adelaide, Sch Agr Food & Wine, Australia<br>Univ Sydney, Plant Breed Inst Cobbitty, Australia<br>Univ Minnesota, USDA-ARS, Cereal Dis Lab, USA                                                                                                   | Mago R, Verlin D, Zhang P et al. 2013. Development of wheat– <i>Aegilops speltoides</i> recombinants and simple PCR-based markers for <i>Sr32</i> and a new stem rust resistance gene on the 2S#1 chromosome. Theor Appl Genet 126(12): 2943-55.      |
| 166. Wheat | Stem rust   | India                        | Indian Agricul Res Inst, Div Genet                                                                                                                                                                                                                                                  | Nagaraja NR, Singh A, Pallavi JK et al. 2013. Validation of molecular markers linked to the stem rust resistance genes effective in India. Indian J Genet Pl Br 73(3): 314-19.                                                                        |
| 167. Wheat | Stem rust   | Canada<br>Australia<br>Kenya | Agric & Agri-Food Canada: Semiarid Prairie Agricul<br>Res Ctr; Cereal Res Ctr, Canada<br>Univ Sydney, Plant Breed Inst Cobbitty, Australia<br>CIMMYT, Kenya                                                                                                                         | Singh A, Knox RE, DePauw RM et al. 2013. Identification and mapping in spring wheat of genetic factors controlling stem rust resistance and the study of their epistatic interactions across multiple environments. Theor Appl Genet 126(8): 1951-64. |
| 168. Wheat | Stem rust   | Mexico                       | CIMMYT                                                                                                                                                                                                                                                                              | Lopez-Vera EE., Nelson S, Singh RP et al. 2013. Resistance to stem rust Ug99 in six bread wheat cultivars maps to chromosome 6DS. Theor Appl Genet, 127(1): 231-39.                                                                                   |
| 169. Wheat | Stem rust   | USA<br>Kenya<br>Australia    | USDA-ARS: Small Grains & Potato Germplasm Res Unit; Eastern Reg<br>Genotyping Lab; Cereal Dis Lab, USA<br>N Dakota State Univ, Dept Plant Pathol, USA<br>Univ Minnesota, USDA-ARS, Cereal Dis Lab, USA<br>Kenya Agricul Res Inst, Kenya<br>Univ Sydney, Plant Breed Inst, Australia | Newcomb M, Acevedo M, Bockelman HE et al. 2013. Field resistance to the Ug99 race group of the stem rust pathogen in spring wheat landraces. Plant Dis 97(7): 882-90.                                                                                 |
| 170. Wheat | Stripe rust | Australia<br>UK              | CSIRO, Plant Ind, Australia<br>JIC, Dept Crop Genet, UK<br>Limagrain UK Ltd, UK<br>Natl Inst Agricul Bot, Dept Genet & Breed, UK                                                                                                                                                    | Powell NM, Lewis CM, Berry ST et al. 2013. Stripe rust resistance genes in the UK winter wheat cultivar Claire. Theor Appl Genet 126(6): 1599-612.                                                                                                    |
| 171. Wheat | Stripe rust | India<br>Switzerland         | Punjab Agric Univ, Dept of Plant Breed Genet & Biotechnol, India<br>Directorate of Wheat Res, Regional Stn, India<br>Univ Zürich, Inst Plant Biol, Switzerland<br>Indian Inst Technol                                                                                               | Chhuneja P, Kaur S, Garg T et al. 2008. Mapping of adult plant stripe rust resistance genes in diploid A genome wheat species and their transfer to bread wheat. Theor Appl Genet 116(3): 313-24.                                                     |
| 172. Wheat | Stripe rust | China                        | Sichuan Agric Univ, State Key Lab of Plant Breed & Genet<br>Shanxi Acad Agric Sci                                                                                                                                                                                                   | Luo PG, Hu XY, Chang ZJ et al. 2009. A new stripe rust resistance gene transferred from <i>Thinopyrum intermedium</i> to hexaploid wheat ( <i>Triticum aestivum</i> ). Phytoprotection 90(2): 57-63.                                                  |
| 173. Wheat | Stripe rust | China                        | Shandong Agric Univ, Coll Life Sci                                                                                                                                                                                                                                                  | Sui XX, He ZH, Lu YM et al. 2010. Molecular mapping of a non-host resistance gene <i>YrpstY1</i> in barley ( <i>Hordeum vulgare</i> L.) for resistance to wheat stripe rust. Yi Chuan (=Hereditas) 147(5): 176-82.                                    |

|            |             |               |                                                                                                                                                                                                                                                       |                                                                                                                                                                                                                                        |
|------------|-------------|---------------|-------------------------------------------------------------------------------------------------------------------------------------------------------------------------------------------------------------------------------------------------------|----------------------------------------------------------------------------------------------------------------------------------------------------------------------------------------------------------------------------------------|
| 174. Wheat | Stripe rust | Australia     | Univ Sydney, Fac Agricul Food & Nat Resour<br>Victorian AgriBioSci Ctr, La Trobe Res & Development Park, Primary Industries Res Victoria                                                                                                              | Bansal UK, Hayden MJ, Gill MB, Bariana HS. 2010. Chromosomal location of an uncharacterised stripe rust resistance gene in wheat. <i>Euphytica</i> 171(1): 121-27.                                                                     |
| 175. Wheat | Stripe rust | China         | Mianyang Acad Agric Sci, Mianyang Branch Natl Wheat Improv Ctr                                                                                                                                                                                        | Ren Y, Li SR, Li J et al. 2011. Genetic analysis and molecular mapping of stripe rust resistance gene in a restore line of thermo-photo sensitive hybrid wheat MR168. <i>Yi Chuan (=Hereditas)</i> 33(11): 1263-70.                    |
| 176. Wheat | Stripe rust | China         | Northwest A&F Univ, Coll Plant Protect                                                                                                                                                                                                                | Chen HH, Yang WD, Wang MN, Jing JX. 2009. Inheritance analysis and molecular mapping of stripe rust resistance gene in wheat differential host Heines peko from Europe. <i>Acta Phytopath Sinica</i> 39(3): 278-84.                    |
| 177. Wheat | Stripe rust | China         | SAAS, Crop Res Inst                                                                                                                                                                                                                                   | Li J, Wei HT, Hu XR et al. 2007. Molecular mapping of stripe rust resistance gene in synthetic derivative Chuanmai 47. <i>Nong ye sheng wu ji shu xue bao = Journal of Agricultural Biotechnology</i> 15(2): 318-22.                   |
| 178. Wheat | Stripe rust | Iran          | Univ Tehran, Coll Agric                                                                                                                                                                                                                               | Mandoulakani BA, Bihamta MR, Zali A et al. 2008. Fine mapping of stripe rust resistance gene <i>Yr15</i> in durum wheat. <i>Seed Plant Improv J.</i> 24(3): 371-88.                                                                    |
| 179. Wheat | Stripe rust | USA           | Washington State Univ, Dept Plant Pathol                                                                                                                                                                                                              | Cheng P, Chen XM. 2010. Molecular mapping of a gene for stripe rust resistance in spring wheat cultivar IDO377s. <i>Theor Appl Genet</i> 121(1): 195-204.                                                                              |
| 180. Wheat | Stripe rust | Turkey        | Sci & Technol Res Council Turkey TUBITAK, Marmara Res Ctr MRC, Genet Engineer & Biotechnol Inst                                                                                                                                                       | Akfirat FS, Aydin Y, Ertugrul F et al. 2010. A Microsatellite marker for yellow rust resistance in wheat. <i>Cereal Res Commun</i> 38(2): 203-10.                                                                                      |
| 181. Wheat | Stripe rust | USA<br>Israel | Univ California, Dept Plant Sci, USA<br>Univ Haifa, Dept Evolutionary & Environm Biol, Israel<br>USDA-ARS, Western Regional Res Ctr, USA<br>Univ California, Depr Plant Pathol, USA<br>USDA-ARS & Washington State Univ, Dept Plant Pathol, USA       | Fu D, Uauy C, Distelfeld A et al. 2009. A kinase-start gene confers temperature-dependent resistance to wheat stripe rust. <i>Science</i> 323(5919): 1357-60.                                                                          |
| 182. Wheat | Stripe rust | Turkey        | Genetic Engineer & Biotechnol Inst, Marmara Res Ctr, Scientific & Technol Res Council Turkey<br>Istanbul Univ, Dept Mol Biol & Genet<br>Marmara Univ, Faculty Engineer, Dept Bioengineer                                                              | Karakas O, Gurel F, Uncuoglu AA. 2011. Assessment of genetic diversity of wheat genotypes by resistance gene analog-EST markers. <i>Genet Mol Res</i> 10(2): 1098-110.                                                                 |
| 183. Wheat | Stripe rust | Australia     | Univ Sydney Plant Breed Inst-Cobbitty, Fac Agric, Food & Natural Resour<br>La Trobe Res & Development Park, Victorian AgriBiosci Ctr, Dept Primary Industries Victoria                                                                                | Bansal UK, Forrest KL, Hayden MJ et al. 2011. Characterisation of a new stripe rust resistance gene <i>Yr47</i> and its genetic association with the leaf rust resistance gene <i>Lr52</i> . <i>Theor Appl Genet</i> 122 (8): 1461-66. |
| 184. Wheat | Stripe rust | USA           | Virginia Tech, Dep Crop & Soil Environm Sci<br>Texas AgriLife Res<br>USDA-ARS, Plant Sci Res Unit<br>Univ Georgia, Dep Crop & Soil Sci<br>Univ Arkansas, Dep Plant Pathol<br>Washington State Univ, USDA-ARS, Wheat Genet Qual Physiol & Dis Res Unit | Christopher MD, Liu SY, Hall, MD et al. 2013. Identification and mapping of adult plant stripe rust resistance in soft red winter wheat VA00W-38. <i>Crop Sci</i> 53(3): 871-79.                                                       |



|            |             |                    |                                                                                                                                                                                                                                                                                           |                                                                                                                                                                                                                                                              |
|------------|-------------|--------------------|-------------------------------------------------------------------------------------------------------------------------------------------------------------------------------------------------------------------------------------------------------------------------------------------|--------------------------------------------------------------------------------------------------------------------------------------------------------------------------------------------------------------------------------------------------------------|
| 185. Wheat | Stripe rust | Mexico<br>China    | CIMMYT, Mexico<br>Hebei Agricul Univ, Biologic Control Ctr Plant Dis & Plant Pests of Hebei, Dept Plant Pathol, China<br>Dept Biotecnologia & Bioingenieria, Centro de Investigación & Estudios Avanzados Inst Politécnico Nacional, Mexico<br>Campo Exper Valle de Mexico INIFAP, Mexico | Li, Z. F., Singh, S., Singh, R., Lopez-Vera, E. and Huerta-Espino, J. (2013). Genetics of resistance to yellow rust in PBW343 x Kenya Kudu recombinant inbred line population and mapping of a new resistance gene <i>YrKK</i> . Mol Breeding 32(4): 821-29. |
| 186. Wheat | Stripe rust | China<br>Pakistan  | Northwest A&F Univ, Coll Agron, State Key Lab Crop Stress Biol Arid Areas, China<br>Sindh Agricul Univ, Dept Biotechnol, Pakistan                                                                                                                                                         | Yang BJ, Ji WQ, Wang CY et al. 2013. Chromosome location and SSR markers of a stripe rust resistance gene from wheat ( <i>Triticum aestivum</i> ) line N9738. Pak J Botany 45(3): 719-24.                                                                    |
| 187. Wheat | Stripe rust | China<br>Mexico    | SAAC: Crop Res Inst, Key Lab Biol & Genet Breed Wheat Southwest; State Key Lab Plant Breed & Genet, China<br>CIMMYT, Mexico<br>Campo Experim Valle Mexico INIFAP, Mexico                                                                                                                  | Yang EN, Rosewarne GM, Herrera-Foessel SA et al. 2013. QTL analysis of the spring wheat "Chapio" identifies stable stripe rust resistance despite inter-continental genotype x environment interactions. Theor Appl Genet 126(7): 1721-32.                   |
| 188. Wheat | Stripe rust | China<br>Canada    | Sichuan Agricul Univ, Triticeae Res Inst, China<br>Agric & Agric-Food Canada, Canada, Eastern Cereal & Oilseed Res Ctr<br>Sichuan Agricul Univ, Minis Educ, Key Lab Crop Genetic Resour & Improv, China                                                                                   | Kang H, Wang Y, Fedak G et al. 2011. Introgression of chromosome 3Ns from <i>Psathyrostachys huashanica</i> into wheat specifying resistance to stripe rust. PLoS One 6(7): e21802.                                                                          |
| 189. Wheat | Stripe rust | China              | Shanxi Univ, Coll Life Sci<br>Acad Agricul Sci, Inst Crop Sci, Shanxi<br>Mini Agric, Key Lab Crop Gene Resour & Germplasm Enhancement Loess Plateau<br>Univ Electronic Sci & Technol China, School Life Sci & Technol<br>Shanxi Agricul Univ, Coll Agron                                  | Liu J, Chang Z, Zhang X et al. 2013. Putative <i>Thinopyrum intermedium</i> -derived stripe rust resistance gene <i>Yr50</i> maps on wheat chromosome arm 4BL. Theor Appl Genet 126(1): 265-74.                                                              |
| 190. Wheat | Stripe rust | France             | CNRS-INRA-UPS-INAPG , UMR Génétique Végétale                                                                                                                                                                                                                                              | Rhone B, Raquin AL, Goldringer I. 2007. Strong linkage disequilibrium near the selected <i>Yr17</i> resistance gene in a wheat experimental population. Theor Appl Genet 114(5): 787-802.                                                                    |
| 191. Wheat | Stripe rust | China<br>USA       | Northwest A&F University, Coll Plant Protect, Shaanxi Key Lab Molecular Biol Agricul, China<br>USDA-ARS & Washington State Univ, Deprt Plant Pathol, USA                                                                                                                                  | Wang X, Liu W, Chen X et al. 2010. Differential gene expression in incompatible interaction between wheat and stripe rust fungus revealed by cDNA-AFLP and comparison to compatible interaction. BMC Plant Biol 10: 9                                        |
| 192. Wheat | Stripe rust | USA                | Washington State Univ: Dept Crop & Soil Sci; USDA-ARS Western Wheat Quality Lab; USDA-ARS, Wheat Genet, Quality, Physiol & Dis Res Unit; Dept Plant Pathol                                                                                                                                | Randhawa HS, Mutti JS, Kidwell K et al. 2009. Rapid and targeted introgression of genes into popular wheat cultivars using marker-assisted background selection. PLoS One 4(6): e5752.                                                                       |
| 193. Wheat | Stripe rust | South Africa<br>UK | Univ Free State, Dep Plant Sci, South Africa<br>JIC, Dept Dis & Stress Biol, UK<br>CenGen (Pty) Ltd, South Africa                                                                                                                                                                         | Agenbag GM, Pretorius ZA, Boyd LA et al. 2012. Identification of adult plant resistance to stripe rust in the wheat cultivar Cappelle-Desprez. Theor Appl Genet 125(1): 109-20.                                                                              |
| 194. Wheat | Stripe rust | China              | CAAS, Inst Crop Sci, Natl Wheat Improv Ctr/The Natl Key Facility Crop Gene Resour & Genetic Improv<br>Northwest Sci-Tech Univ A&F, Coll Agron<br>CIMMYT China Off                                                                                                                         | Asad MA, Xia X, Wang C, He Z. 2012. Molecular mapping of stripe rust resistance gene <i>Yrsn104</i> in chinese wheat line shaannong 104. Hereditas 149(4): 146-52.                                                                                           |

|            |             |                        |                                                                                                                                                                                                                                                                                                                              |                                                                                                                                                                                                                                                                     |
|------------|-------------|------------------------|------------------------------------------------------------------------------------------------------------------------------------------------------------------------------------------------------------------------------------------------------------------------------------------------------------------------------|---------------------------------------------------------------------------------------------------------------------------------------------------------------------------------------------------------------------------------------------------------------------|
| 195. Wheat | Stripe rust | Turkey                 | Marmara Univ: Fac Sci & Letters, Dept Biol; Fac Engineer; Dept Bioengineer                                                                                                                                                                                                                                                   | Cabuk E, Aydin Y, Uncuoglu AA. 2011. Assessing wheat ( <i>Triticum aestivum</i> ) genotypes for "Yr" resistance genes using conserved regions and simple-sequence motifs. Genet Mol Res 10(4): 3463-71.                                                             |
| 196. Wheat | Stripe rust | China                  | CAS, Key Lab Plant Mol Physiol, Inst Botany                                                                                                                                                                                                                                                                                  | Cao X, Zhou J, Gong X et al. 2012. Identification and validation of a major quantitative trait locus for slow-rusting resistance to stripe rust in wheat. J Integr Plant Biol 54(5): 330-44.                                                                        |
| 197. Wheat | Stripe rust | USA                    | USDA-ARS, Wheat Genet, Quality, Physiol & Dis Res Unit<br>Washington State Univ: Dept Plant Pathol; Dept Mol Biosci                                                                                                                                                                                                          | Coram TE, Settles M., Wang M, Chen X. 2008. Surveying expression level polymorphism and single-feature polymorphism in near-isogenic wheat lines differing for the Yr5 stripe rust resistance locus. Theor Appl Genet 117(3): 401-11.                               |
| 198. Wheat | Stripe rust | USA<br>India<br>Mexico | Oregon State Univ, Dept Crop & Soil Sci, USA<br>Limagrain Cereals Seeds, USA<br>Internatl Crops Res Inst Semi-Arid Tropics (ICRISAT), India<br>Washington State Univ: USDA-ARS, Wheat Genet, Quality, Physiol & Dis Res Unit; Dept Plant Pathol, USA<br>CIMMYT, Mexico<br>Oregon State Univ, Dept Botany & Plant Pathol, USA | Dolores Vazquez M, James Peterson C, Riera-Lizarazu O et al. 2012. Genetic analysis of adult plant, quantitative resistance to stripe rust in wheat cultivar 'Stephens' in multi-environment trials. Theor Appl Genet 124(1): 1-11.                                 |
| 199. Wheat | Stripe rust | USA                    | Washington State Univ<br>USDA-ARS                                                                                                                                                                                                                                                                                            | Feng J, Wang M, Hou L, Chen X. 2013. QTL mapping of resistance to stripe rust in spring wheat PI 182103. Phytopathology 103(6): 42-43.                                                                                                                              |
| 200. Wheat | Stripe rust | China                  | CAAS, Inst Plant Protect, State Key Lab Biol Plant Dis & Insect Plant Protect<br>Yunnan Agricul Univ                                                                                                                                                                                                                         | Feng J, Xu JJ, Lin RM et al. 2013. Genetic analysis and location of gene for resistance to stripe rust in wheat international differential host Strubes Dickkopf. Journal of Genetics 92(2): 267-72.                                                                |
| 201. Wheat | Stripe rust | China                  | China Agricul Univ: Dept Plant Pathol; Coll Sci                                                                                                                                                                                                                                                                              | Guo Q, Zhang ZJ, Xu YB et al. 2008. Quantitative trait loci for high-temperature adult-plant and slow-rusting resistance to <i>Puccinia striiformis</i> f. sp. <i>tritici</i> in wheat cultivars. Phytopathology 98(7): 803-09.                                     |
| 202. Wheat | Stripe rust | USA                    | Univ Georgia, Griffin Campus: Dept Crop & Soil Sci; Dept Plant Pathol<br>North Carolina State Univ, USDA-ARS Plant Sci Res, Dept Crop Sci                                                                                                                                                                                    | Hao Y, Chen Z, Wang Y et al. 2011. Characterization of a major QTL for adult plant resistance to stripe rust in US soft red winter wheat. Theor Appl Genet 123(8): 1401-11.                                                                                         |
| 203. Wheat | Stripe rust | China                  | Univ Electronic Sci & Technol China, School Life Sci & Technol<br>Shanxi Acad Agricul Sci, Crop Genetic Inst Taiyuan, China                                                                                                                                                                                                  | Hu, L. J., Li, G. R., Zeng, Z. X., Chang, Z. J., Liu, C. and Yang, Z. J. (2011). Molecular characterization of a wheat - <i>Thinopyrum ponticum</i> partial amphiploid and its derived substitution line for resistance to stripe rust. J Appl Genet 52(3): 279-85. |
| 204. Wheat | Stripe rust | UK                     | JIC, Norwich Res Park, Dept Dis & Biol<br>Limagrain UK Ltd                                                                                                                                                                                                                                                                   | Jagger LJ, Newell C, Berry ST et al. 2011. The genetic characterisation of stripe rust resistance in the german wheat cultivar Alcedo. Theor Appl Genet 122(4): 723-33.                                                                                             |
| 205. Wheat | Stripe rust | China<br>Australia     | CAAS, Inst Crop Sci, Natl Wheat Improv Ctr/The Natl Key Facility Crop Gene Resour & Genetic Improv, China<br>Victorian AgriBiosci Ctr, Dept Primary Industries, Australia<br>Gansu Acad Agricul Sci, Gansu Wheat Res Inst, China                                                                                             | Lan C, Liang S, Zhou X et al. 2010. Identification of genomic regions controlling adult-plant stripe rust resistance in Chinese landrace Pingyuan 50 through bulked segregant analysis. Phytopathology 100(4): 313-18.                                              |

CIMMYT China Off, China

|            |             |                              |                                                                                                                                                                                                                                                                                    |                                                                                                                                                                                                                                                      |
|------------|-------------|------------------------------|------------------------------------------------------------------------------------------------------------------------------------------------------------------------------------------------------------------------------------------------------------------------------------|------------------------------------------------------------------------------------------------------------------------------------------------------------------------------------------------------------------------------------------------------|
| 206. Wheat | Stripe rust | China<br>USA                 | Northwest A&F Univ, Coll Plant Protect & Shaanxi Key Lab Mol Biol Agric, China<br>Washington State Univ, Dept Plant Pathol, USA<br>USDA-ARS, Wheat Genet, Quality Physiol & Dis Res Unit, Dept Agric, USA                                                                          | Li Q, Chen XM, Wang MN, Jing JX. 2011. <i>Yr45</i> , a new wheat gene for stripe rust resistance on the long arm of chromosome 3D. Theor Appl Genet 122(1): 189-97.                                                                                  |
| 207. Wheat | Stripe rust | China<br>USA                 | CAAS: Inst Plant Protect, State Key Lab Biol Plant Dis & Insect Pests; Inst Agricul Resour & Regional Planning, China<br>Chinese Acad Medical Sci & Peking Union Medical Coll, Inst Medicinal Plant Development, China<br>Washington State Univ, USDA-ARS & Dept Plant Pathol, USA | Li Y, Niu YC, Chen XM. 2009. Mapping a stripe rust resistance gene <i>YrC591</i> in wheat variety C591 with SSR and AFLP markers. Theor Appl Genet 118(2): 339-46.                                                                                   |
| 208. Wheat | Stripe rust | USA<br>China                 | Washington State Univ, Dept Plant Pathol, USA<br>Shenyang Agricul Univ, Biosci & Technol Coll, China<br>USDA-ARS, Wheat Genet, Quality, Physiol & Dis ResUnit, USA                                                                                                                 | Lin F, Chen XM. 2007. Genetics and molecular mapping of genes for race-specific all-stage resistance and non-race-specific high-temperature adult-plant resistance to stripe rust in spring wheat cultivar Alpowa. Theor Appl Genet 114(7): 1277-87. |
| 209. Wheat | Stripe rust | USA<br>China                 | Washington State Univ, Dept Plant Pathol, USA<br>Shenyang Agricul Univ, Biosci & Technol Coll, China<br>USDA-ARS, Wheat Genet, Quality, Physiol & Dis Res Unit, USA                                                                                                                | Lin F, Chen XM. 2008. Molecular mapping of genes for race-specific overall resistance to stripe rust in wheat cultivar Express. Theor Appl Genet 116(6): 797-806.                                                                                    |
| 210. Wheat | Stripe rust | USA<br>China                 | Washington State Univ, Dept Plant Pathol, USA<br>Shenyang Agricul Univ, Biosci & Technol Coll, China<br>USDA-ARS, Wheat Genet, Quality, Physiol & Dis Res Unit, USA                                                                                                                | Lin F, Chen XM. 2009. Quantitative trait loci for non-race-specific, high-temperature adult-plant resistance to stripe rust in wheat cultivar Express. Theor Appl Genet 118(4): 631-42.                                                              |
| 211. Wheat | Stripe rust | China                        | CAAS: Inst Agricul Resour & Regional Planning; Inst Plant Protect<br>Agricul Univ Anhui, Plant Protect Acad                                                                                                                                                                        | Liu F, Niu Y, Deng H, Tan G. 2007. Mapping of a major stripe rust resistance gene in chinese native wheat variety Chike using microsatellite markers. J Genet Genomics 34(12): 1123-30.                                                              |
| 212. Wheat | Stripe rust | USA<br>Republic of Macedonia | Univ California, Depat Plant Sci, USA<br>Fac Agricul Sci & Food, Dept Genet & Plant Breed, Republic of Macedonia<br>USDA-ARS: Cereal Crops Res Unit; Wheat Genet, Quality Physiol & Dis Res Unit, USA                                                                              | Lowe I, Jankuloski L, Chao S et al. 2011. Mapping and validation of QTL which confer partial resistance to broadly virulent post-2000 North American races of stripe rust in hexaploid wheat. Theor Appl Genet 123(1): 143-57.                       |
| 213. Wheat | Stripe rust | China                        | CAAS, Inst Crop Sci, Natl Wheat Improv Ctr/Natl Key Facility Crop Gene Resour & Genetic Improv<br>Northwest A&F Univ, Coll Plant Protect<br>Gansu Acad Agricul Sci, Gansu Wheat Res Inst<br>CIMMYT China Off                                                                       | Lu Y, Lan C, Liang S et al. 2009. QTL mapping for adult-plant resistance to stripe rust in Italian common wheat cultivars Libellula and Strampelli. Theor Appl Genet 119(8): 1349-59.                                                                |
| 214. Wheat | Stripe rust | China                        | SAAS, State Key Lab Plant Breed & Genet<br>Univ Electronic Sci & Technol China, School Life Sci & Technol                                                                                                                                                                          | Luo PG, Hu XY, Ren ZL et al. 2008. Allelic analysis of stripe rust resistance genes on wheat chromosome 2BS. Genome 51(11): 922-27.                                                                                                                  |

|            |             |                             |                                                                                                                                                                                                                                                                                   |                                                                                                                                                                                                                                           |
|------------|-------------|-----------------------------|-----------------------------------------------------------------------------------------------------------------------------------------------------------------------------------------------------------------------------------------------------------------------------------|-------------------------------------------------------------------------------------------------------------------------------------------------------------------------------------------------------------------------------------------|
| 215. Wheat | Stripe rust | China                       | Northwest A&F Univ , Coll Plant Protection, State Key Lab Crop Stress Biol Arid Areas                                                                                                                                                                                             | Ma DF, Zhou XL, Hou L et al. 2013. Genetic analysis and molecular mapping of a stripe rust resistance gene derived from <i>Psathyrostachys huashanica</i> Keng in wheat line H9014-121-5-5-9. Mol Breeding 32(2): 365-72.                 |
| 216. Wheat | Stripe rust | UK                          | JIC, Dept Dis & Stress Biol<br>Syngenta Seeds Ltd<br>Nickerson-Advanta UK                                                                                                                                                                                                         | Melichar JP, Berry S, Newell C et al. 2008. QTL identification and microphenotype characterisation of the developmentally regulated yellow rust resistance in the UK wheat cultivar Guardian. Theor Appl Genet 117(3): 391-99.            |
| 217. Wheat | Stripe rust | France                      | INRA UMR 118, Amélioration Plantes & Biotechnologies Végétales INRA UMR 1095<br>INRA BIOGER-CPP, UR 1290<br>INRA UMR 118 Biogenouest, Plateforme Genotypage                                                                                                                       | Paillard S, Trotoux-Verplancke G, Perretant MR et al. 2012. Durable resistance to stripe rust is due to three specific resistance genes in French bread wheat cultivar Apache. Theor Appl Genet 125 (5): 955-65.                          |
| 218. Wheat | Stripe rust | Australia<br>Czech Republic | Univ Sydney PBI-Cobbitty, Fac Agricul & Environ, Dept Plant & Food Sci, Australia<br>Inst Exp Botany AS CR, Ctr Region Haná Biotechnological & Agricul Res, Czech Republic                                                                                                        | Randhawa M, Bansal U, Valárik M et al. 2013. Molecular mapping of stripe rust resistance gene <i>Yr51</i> in chromosome 4AL of wheat. Theor Appl Genet 127(2): 317-24.                                                                    |
| 219. Wheat | Stripe rust | China<br>USA                | China Agricul Univ, Dept Plant Pathol, China<br>Washington State Univ, Dept Plant Pathol, USA<br>USDA-ARS, Wheat Genet, Quality, Physiol & Dis Res Unit, USA                                                                                                                      | Ren RS, Wang MN, Chen XM, Zhang ZJ. 2012. Characterization and molecular mapping of <i>Yr52</i> for high-temperature adult-plant resistance to stripe rust in spring wheat germplasm PI 183527. Theor Appl Genet 125(5): 847-57.          |
| 220. Wheat | Stripe rust | China<br>Norway             | CAAS, Inst Crop Sci, Natl Wheat Improv Ctr/The Natl Key Facility Crop Gene Resour & Genetic Improv, China<br>CIMMYT China Off, China<br>Norwegian Univ Life Sci, Dept Plant & Environm Sci, Norway<br>SAAS, Crop Res Inst, China<br>Gansu Acad Agricul Sci, Wheat Res Inst, China | Ren Y, He Z, Li J et al. 2012. QTL mapping of adult-plant resistance to stripe rust in a population derived from common wheat cultivars Naxos and Shanghai 3/Catbird. Theor Appl Genet 125(6): 1211-21.                                   |
| 221. Wheat | Stripe rust | USA                         | Washington State Univ: Dept Crop & Soil Sci; Dept Plant Pathol<br>USDA-ARS, Wheat Genet, Quality, Physiol & Dis Res Unit                                                                                                                                                          | Santra DK, Chen XM, Santra M et al. 2008. Identification and mapping QTL for high-temperature adult-plant resistance to stripe rust in winter wheat ( <i>Triticum aestivum</i> L.) cultivar 'Stephens'. Theor Appl Genet 117(5): 793-802. |
| 222. Wheat | Stripe rust | UK                          | JIC: Dept Dis & Stress Biol; Dept Crop Genet                                                                                                                                                                                                                                      | Smith PH, Hadfield J, Hart NJ et al. 2007. STS markers for the wheat yellow rust resistance gene <i>Yr5</i> suggest a NBX-LRR-type resistance gene cluster. Genome 50(3): 259-65.                                                         |
| 223. Wheat | Stripe rust | Pakistan<br>USA             | Internatl Islamic Univ, Dept Biotechnol & Bioinformatics, Pakistan<br>NUST Ctr Virology & Immunol, Natl Univ Sci & Technol (NUST), Pakistan<br>Washington State Univ, USDA-ARS; Dept Plant Pathol, USA                                                                            | Sobia T, Muhammad A, Chen X. 2010. Evaluation of Pakistan wheat germplasms for stripe rust resistance using molecular markers. Sci China Life Sci 53(9): 1123-34.                                                                         |
| 224. Wheat | Stripe rust | USA                         | Washington State Univ, Dept Plant Pathol<br>USDA-ARS, Wheat Genet, Quality, Physiol & Dis Res Unit                                                                                                                                                                                | Sui XX, Wang MN, Chen XM. 2009. Molecular mapping of a stripe rust resistance gene in spring wheat cultivar Zak. Phytopathology 99(10): 1209-15.                                                                                          |

|            |                          |                     |                                                                                                                                                                                                                                                                   |                                                                                                                                                                                                                                                                                               |
|------------|--------------------------|---------------------|-------------------------------------------------------------------------------------------------------------------------------------------------------------------------------------------------------------------------------------------------------------------|-----------------------------------------------------------------------------------------------------------------------------------------------------------------------------------------------------------------------------------------------------------------------------------------------|
| 225. Wheat | Stripe rust              | USA                 | Washington State Univ, USDA-ARS                                                                                                                                                                                                                                   | Wang M, Chen X. 2013. Association mapping for stripe rust resistance genes in spring wheat germplasm lines. <i>Phytopathology</i> 103(6): 155-55.                                                                                                                                             |
| 226. Wheat | Stripe rust              | China<br>USA        | Northwest A&F Univ, Coll Life Sci, Shaanxi Key Lab Mol Biol Agric, State Key Lab Crop Stress Biol Arid Areas, China<br>Washington State Univ, Dept Plant Pathol, USA<br>USDA-ARS, Wheat Genet, Quality, Physiol & Dis Res Unit, USA                               | Xu LS, Wang MN, Cheng P et al. 2013. Molecular mapping of <i>Yr53</i> , a new gene for stripe rust resistance in durum wheat accession PI 480148 and its transfer to common wheat. <i>Theor Appl Genet</i> 126(2): 523-33.                                                                    |
| 227. Wheat | Stripe rust              | Australia           | Univ Sydney, Plant Breed Inst                                                                                                                                                                                                                                     | Zhang P, McIntosh RA., Hoxha S, Dong C. 2009. Wheat stripe rust resistance genes <i>Yr5</i> and <i>Yr7</i> are allelic. <i>Theor Appl Genet</i> 120(1): 25-9.                                                                                                                                 |
| 228. Wheat | Stripe rust              | China               | Northwest A&F Univ: State Key Lab Crop Stress Biol Arid Areas; Coll Plant Protect; Coll Agron; Coll Life Sci                                                                                                                                                      | Zhang X, Han D, Zeng Q et al. 2013. Fine mapping of wheat stripe rust resistance gene <i>Yr26</i> based on collinearity of wheat with <i>Brachypodium distachyon</i> and rice. <i>PLoS One</i> 8(3): e57885.                                                                                  |
| 229. Wheat | Stripe rust              | USA<br>Mexico       | Univ Minnesota, Dep Agron & Plant Genet, USA<br>CIMMYT, Mexico<br>USDA-ARS, Cereal Dis Lab, USA<br>INIFAP, Mexico                                                                                                                                                 | Zhang J LX, Singh RP, Kolmer JA et al. 2008. Inheritance of leaf rust resistance in the CIMMYT wheat Weebill 1. <i>Crop Sci</i> 48(3): 1037-47.                                                                                                                                               |
| 230. Wheat | Stripe rust              | China               | Northwest Sci-Tech Univ A&F, Coll Plant Protect                                                                                                                                                                                                                   | Zhou XL, Wang WL, Wang LL et al. 2011. Genetics and molecular mapping of genes for high-temperature resistance to stripe rust in wheat cultivar Xiaoyan 54. <i>Theor Appl Genet</i> 123(3): 431-38.                                                                                           |
| 231. Wheat | Leaf rust<br>Stripe rust | USA                 | Kansas State Univ, Dept Plant Pathol, Wheat Genet & Genom Resour Ctr<br>Washington State Univ, USDA-ARS, Western Regional Small Grains Genotyping Lab                                                                                                             | Kuraparthi V, Sood S, See DR, Gill BS. 2009. Development of a PCR assay and marker-assisted transfer of leaf rust and stripe rust resistance genes <i>Lr57</i> and <i>Yr40</i> into hard red winter wheats. <i>Crop Sci</i> 49(1): 120-26.                                                    |
| 232. Wheat | Leaf rust<br>Stripe rust | USA<br>India        | Kansas State Univ, Wheat Genetic & Genomic Resour Ctr, Dept Plant Pathol, USA<br>Punjab Agricul Univ, Dep Plant Breed, Genet & Biotechnol, India<br>Indian Inst Technol, Dept Biotechnol, India<br>Kansas State Univ, USDA-ARS, Plant Sci & Entomol Res Unit, USA | Kuraparthi V, Chhuneja P, Dhaliwal HS et al. 2007. Characterization and mapping of cryptic alien introgression from <i>Aegilops geniculata</i> with new leaf rust and stripe rust resistance genes <i>Lr57</i> and <i>Yr40</i> in wheat. <i>Theor Appl Genet</i> 114(8): 1379-89.             |
| 233. Wheat | Leaf rust<br>Stripe rust | Australia<br>Iran   | Univ Sydney, Plant Breed Inst, Australia<br>Shiraz Univ, Coll Agric, Dept Agron & Plant Breed, Iran                                                                                                                                                               | Dadkhodaie, N. A., Karaoglou, H., Wellings, C. R. and Park, R. F. (2011). Mapping genes <i>Lr53</i> and <i>Yr35</i> on the short arm of chromosome 6B of common wheat with microsatellite markers and studies of their association with <i>Lr36</i> . <i>Theor Appl Genet</i> 122(3): 479-87. |
| 234. Wheat | Leaf rust<br>Stripe rust | Australia<br>Mexico | CSIRO Plant Ind, Australia<br>CIMMYT, Mexico<br>Campo Experim Valle Mexico INIFAP, Mexico                                                                                                                                                                         | Rosewarne GM, Singh RP, Huerta-Espino J et al. 2008. Quantitative trait loci for slow-rusting resistance in wheat to leaf rust and stripe rust identified with multi-environment analysis. <i>Theor Appl Genet</i> 116(7): 1027-34.                                                           |
| 235. Wheat | Leaf rust<br>Stripe rust | Canada<br>Australia | Agric & Agri-Food Canada, Cereal Res Ctr; Semiarid Prairie Agricul Res Ctr, Canada<br>La Trobe Res & Develop Park, Victorian AgriBiosci Ctr, Dept Primary Industries, Australia                                                                                   | Hiebert CW, Thomas JB, McCallum BD et al. 2010. An introgression on wheat chromosome 4DL in RL6077 (Thatcher*6/PI 250413) confers adult plant resistance to stripe rust and leaf rust ( <i>Lr67</i> ). <i>Theor Appl Genet</i> 121(6): 1083-91.                                               |

|                            |                          |                              |                                                                                                                                                                                                                                                                                                      |                                                                                                                                                                                                                                                                                                          |
|----------------------------|--------------------------|------------------------------|------------------------------------------------------------------------------------------------------------------------------------------------------------------------------------------------------------------------------------------------------------------------------------------------------|----------------------------------------------------------------------------------------------------------------------------------------------------------------------------------------------------------------------------------------------------------------------------------------------------------|
| CSIRO Plant Ind, Australia |                          |                              |                                                                                                                                                                                                                                                                                                      |                                                                                                                                                                                                                                                                                                          |
| 236. Wheat                 | Leaf rust<br>Stripe rust | Mexico<br>Australia<br>Kenya | CIMMYT, Mexico<br>CSIRO Plant Ind,Australia<br>Campo Experim Valle de México INIFAP, Mexico<br>Victorian AgriBiosci Ctr, Dept Primary Industries, Australia<br>Univ Sydney Plant Breed Inst-Cobbitty, Australia<br>CIMMYT, ICRAF House, Kenya                                                        | Herrera-Foessel SA, Lagudah ES, Huerta-Espino J, 2011. New slow-rusting leaf rust and stripe rust resistance genes <i>Lr67</i> and <i>Yr46</i> in wheat are pleiotropic or closely linked. Theor Appl Genet 122(1): 239-49.                                                                              |
| 237. Wheat                 | Leaf rust<br>Stripe rust | China                        | CAAS: Inst Crop Sci, Natl Wheat Improv Ctr/Natl Key Facility Crop Gene Resour & Genetic Improv<br>Biologic Control Ctr Plant Dis & Plant Pests Hebei, Agricul Univ Hebei, Coll Plant Protect, Dept Plant Pathol<br>CIMMYT China Off<br>SAAS, Crop Res Inst<br>Gansu Acad Agricul Sci, Wheat Res Inst | Ren Y, Li Z, He Z et al. 2012. Qtl mapping of adult-plant resistances to stripe rust and leaf rust in Chinese wheat cultivar Bainong 64. Theor Appl Genet 125(6): 1253-62.                                                                                                                               |
| 238. Wheat                 | Leaf rust<br>Stripe rust | China<br>Mexico<br>Australia | CIMMYT China Off, China<br>CIMMYT, Mexico<br>Campo Experim Valle Mexico INIFAP, Mexico<br>Victorian AgriBiosci Ctr, Dept Primary Industries Victoria, Australia<br>CSIRO Plant Ind, Australia                                                                                                        | Rosewarne GM, Singh RP, Huerta-Espino J et al. 2012. Analysis of leaf and stripe rust severities reveals pathotype changes and multiple minor QTLs associated with resistance in an Avocet x Pastor wheat population. Theor Appl Genet 124(7): 1283-94.                                                  |
| 239. Wheat                 | Leaf rust<br>Stripe rust | India,<br>Switzerland        | Punjab Agric Univ, Dept Plant Breed Genet & Biotechnol, India<br>Univ Zürich, Inst Plant Biol, Switzerland<br>Indian Inst Technol                                                                                                                                                                    | Singh K, Chhuneja P, Ghai M et al. 2007. Molecular mapping of leaf and stripe rust resistance genes in <i>T. monococcum</i> and their transfer to hexaploid wheat. Developments in Plant Breeding 12. 779-86.                                                                                            |
| 240. Wheat                 | Leaf rust<br>Stripe rust | India                        | Punjab Agric Univ, Dept Plant Breed Genet & Biotechnol<br>Indian Inst Technol                                                                                                                                                                                                                        | Chhuneja P, Kaur S, Goel RK et al. 2007. Introgression of leaf rust and stripe rust resistance genes from <i>Aegilops umbellulata</i> to hexaploid wheat through induced homoeologous pairing. Wheat Production in Stressed Environments (eds. Buck HT et al.) Developments in Plant Breeding 12. 83-90. |
| 241. Wheat                 | Leaf rust<br>Stripe rust | USA                          | Kansas State Univ, Dept Plant Pathol, Wheat Genet & Genom Resour Ctr<br>N Carolina State Univ, Dept Crop Sc                                                                                                                                                                                          | Kuraparthi V, Sood S, Gill BS. 2009. Molecular genetic description of the cryptic wheat- <i>Aegilops geniculata</i> introgression carrying rust resistance genes <i>Lr57</i> and <i>Yr40</i> using wheat ESTs and synteny with rice. Genome 52(12): 1025-36.                                             |
| 242. Wheat                 | Leaf rust<br>Stripe rust | Mexico<br>Australia          | CIMMYT, Mexico<br>Univ Adelaide, Australian Mol Plant Breed Cooperative Res Ctr (MPBCRC), Australia<br>Campo Experim Valle Mexico INIFAP, Mexico                                                                                                                                                     | William, H. M., Singh, R. P., Huerta-Espino, J. and Rosewarne, G. (2007). Characterization of genes for durable resistance to leaf rust and yellow rust in CIMMYT spring wheats. In: Buck HT et al. (eds.): Wheat Production in Stressed Environments. Developments in Plant Breeding 12: 65-70.         |
| 243. Wheat                 | Leaf rust                | Australia                    | CSIRO Plant Ind, Australia                                                                                                                                                                                                                                                                           | Kolmer JA, Singh RP, Garvin DF et al. 2008. Analysis of the <i>Lr34/Yr18</i> rust                                                                                                                                                                                                                        |

|            |                                            |                                                |                                                                                                                                                                                                                                                                                 |                                                                                                                                                                                                                                                |
|------------|--------------------------------------------|------------------------------------------------|---------------------------------------------------------------------------------------------------------------------------------------------------------------------------------------------------------------------------------------------------------------------------------|------------------------------------------------------------------------------------------------------------------------------------------------------------------------------------------------------------------------------------------------|
|            | Stripe rust                                | UK<br>USA<br>Mexico                            | DNRE, Australia<br>NSW Dep Primary Ind, Australia<br>JIC, UK<br>Univ Sydney, Plant Breed Inst, Australia<br>Univ Minnesota: USDA-ARS, Cereal Dis Lab; Dep Agron & Plant Genet USA<br>CIMMYT, Mexico<br>Campo Experim Valle Mexico INIFAP, Mexico                                | resistance region in wheat germplasm. Crop Sci 48(5): 1841-52.                                                                                                                                                                                 |
| 244. Wheat | Leaf rust<br>Stripe rust                   | India                                          | Indian Agr Res Inst, Div Genet<br>Natl Res Ctr Plant Biotechnol                                                                                                                                                                                                                 | Revathi P, Tomar SMS, Vinod, Singh NK. 2010. Marker assisted gene pyramiding of leaf rust resistance genes Lr24, Lr28 along with stripe rust resistance gene Yr15 in wheat ( <i>Triticum aestivum</i> L.). Indian J Genet Pl Br 70(4): 349-54. |
| 245. Wheat | Leaf rust<br>Stripe rust                   | USA<br>Czech Republic<br>India<br>Saudi Arabia | Kansas State Univ, Dept Plant Pathol, Wheat Genet Resour Ctr<br>Inst Exp Botany AS CR, Ctr Region Haná Biotechnological & Agricul Res, Czech Republic<br>Punjab Agricul Univ, School Agricul Biotechnol, India<br>King Abdulaziz Univ, Fac Sci, Dept Biologic Sci, Saudi Arabia | Tiwari VK, Wang S, Sehgal S et al. 2014. SNP Discovery for mapping alien introgressions in wheat. BMC Genomics 15(1): 273.                                                                                                                     |
| 246. Wheat | Leaf rust<br>Stripe rust<br>Powdery mildew | Australia<br>Switzerland<br>Mexico<br>USA      | CSIRO Plant Ind, Australia<br>Univ Zürich, Inst Plant Biol, Switzerland<br>CIMMYT, Mexico<br>Campo Experim Valle de Mexico INIFAP, Mexico<br>N Carolina State Univ, USDA-ARS Plant Sci Res Unit, Dept Crop Sci, USA                                                             | Lagudah ES, Krattinger SG, Herrera-Foessel S et al. 2009. Gene-specific markers for the wheat gene <i>Lr34/Yr18/Pm38</i> which confers resistance to multiple fungal pathogens. Theor Appl Genet 119(5): 889-98.                               |
| 247. Wheat | Leaf rust<br>Stripe rust<br>Powdery mildew | Germany                                        | Univ Hohenheim, State Plant Breed Inst<br>Leibniz Inst Plant Genet & Crop Plant Res (IPK), Dept Cytogenet & Genome Analysis<br>KWS LOCHOW GmbH<br>Nordsaat Saatzeitgesellschaft mbH<br>Lantmännern SW Seed Hadmersleben GmbH<br>Limagrain GmbH                                  | Gowda M, Zhao Y, Wurschum T et al. 2014. Relatedness severely impacts accuracy of marker-assisted selection for disease resistance in hybrid wheat. Heredity (Edinb) 112: 552-61.                                                              |
| 248. Wheat | Leaf rust<br>Stripe rust<br>Powdery mildew | USA                                            | Univ Minnesota, Dept Plant Pathol                                                                                                                                                                                                                                               | Olivera PD, Steffenson BJ. 2009. <i>Aegilops sharonensis</i> : Origin, genetics, diversity, and potential for wheat improvement. Botany-Botanique 87(8): 740-56.                                                                               |
| 249. Wheat | Leaf rust<br>Powdery mildew                | Russia                                         | Russian Acad Sci, Inst Cytol & Genet                                                                                                                                                                                                                                            | Gordeeva EI, Leonova IN, Kalinina NP et al. 2009. Comparative cytological and molecular analysis of common wheat introgression lines containing genetic material of <i>Triticum timopheevii</i> Zhuk. Russ J Genet 45(12): 1428-37.            |
| 250. Wheat | Leaf rust<br>Powdery mildew                | USA                                            | Virginia Polytech Inst & State Univ, Dept Crop & Soil Environm Sci<br>Ohio State Univ, Dep Hort & Crop Sci<br>Univ Kentucky, Dept Plant & Soil Sci<br>Univ Maryland, Dep Plant Sci & Landscape Architecture, College Pk                                                         | Hall MD, Tucker D, Griffey CA et al. 2010. Registration of USG 3209/Jaypee wheat recombinant inbred line mapping population. J Plant Registr 4(2): 159-62.                                                                                     |

|            |                              |                                      |                                                                                                                                                                                                                                                                         |                                                                                                                                                                                                                                               |
|------------|------------------------------|--------------------------------------|-------------------------------------------------------------------------------------------------------------------------------------------------------------------------------------------------------------------------------------------------------------------------|-----------------------------------------------------------------------------------------------------------------------------------------------------------------------------------------------------------------------------------------------|
|            |                              |                                      | USDA-ARS, Plant Sci Res Unit                                                                                                                                                                                                                                            |                                                                                                                                                                                                                                               |
| 251. Wheat | Leaf rust<br>Powdery mildew  | Armenia<br>Italy<br>Germany<br>Syria | Yerevan State Univ, Fac Biol, Dept Ecol & Nat Protect, Armenia<br>Biovers Int, Italy<br>Leibniz Inst Plant Genet & Crop Plant Res IPK, Germany<br>Int Ctr Agr Res Dry Areas ICARDA, Syria                                                                               | Hovhannisyan NA, Dulloo ME, Yesayan AH et al. 2011. Tracking of powdery mildew and leaf rust resistance genes in <i>Triticum boeoticum</i> and <i>T. urartu</i> , wild relatives of common wheat. Czech J Genet Plant Breed 47(2): 45-57.     |
| 252. Wheat | Leaf rust<br>Powdery mildew  | Poland                               | Natl Res Inst Radzikow, Plant Breed & Acclimatizat Inst: Dept Plant Breed & Genet; Dept Plant Pathol                                                                                                                                                                    | Pietrusinska A, Czembor JH, Czembor PC. 2011. Pyramiding two genes for leaf rust and powdery mildew resistance in common wheat. Cereal Res Commun 39(4): 577-88.                                                                              |
| 253. Wheat | Leaf rust<br>Powdery mildew  | Poland                               | Natl Res Inst Radzikow, Plant Breed & Acclimatizat Inst: Dept Plant Breed & Genet; Dept Plant Pathol                                                                                                                                                                    | Pietrusinska A, Czembor PC, Czembor JH. 2013. <i>Lr39+Pm21</i> : a new effective combination of resistance genes for leaf rust and powdery mildew in wheat. Czech J Genet Plant Breeding 49(3): 109-15.                                       |
| 254. Wheat | Leaf rust<br>Wheat curl mite | USA<br>Canada                        | Montana State Univ, Dep Plant Sci & Plant Pathol, USA<br>Agric & Agri-Food Canada, Lethbridge Res Ctr, Canada                                                                                                                                                           | Hofer P, Berg JE, Huang L et al. 2011. Registration of 'Yellowstone' winter wheat backcross-derived lines incorporating leaf rust and wheat curl mite resistance. J Plant Registr 5(3): 422-25.                                               |
| 255. Wheat | Leaf rust<br>Cyst nematode   | Tunisia                              | Univ Tunis El-Manar, Fac Sci Tunis, Unité Recherche Génomique Insectes Ravageurs des Cultures d'intérêt agronomique (GIRC, UR11E510)<br>Univ Jendouba, Inst Supérieur Biotechnol Béja (ISBB)<br>Université Tunis, Inst Supérieur l'Animation Jeunesse & Culture (ISAJC) | Bouktila D, Habachi-Houimli Y, Khalfallah Y et al. 2014. Characterization of novel wheat NBS domain-containing sequences and their utilization, in silico, for genome-scale R-gene mining. Mol Genet Genomics. DOI 10.1007/s00438-014-0834-4. |
| 256. Wheat | Leaf rust<br>Eyespot         | Poland                               | Polish Acad Sci, Inst Plant Genet: Lab Distant Crosses; Lab Metabol                                                                                                                                                                                                     | Kwiatek M, Blaszczyk L, Wisniewska H, Apolinarska B. 2012. <i>Aegilops-Secale</i> amphiploids: chromosome categorisation, pollen viability and identification of fungal disease resistance genes. J Appl Genetics 53(1): 37-40.               |
| 257. Wheat | Stem rust<br>Stripe rust     | Mexico                               | CIFASIS<br>CIMMYT<br>Colegio Postgrad, Montecillo                                                                                                                                                                                                                       | Ornella L, Sukhwinder S., Perez P et al. 2012. Genomic prediction of genetic values for resistance to wheat rusts. Plant Genome 5(3): 136-48.                                                                                                 |
| 258. Wheat | Stem rust<br>Stripe rust     | Australia<br>Switzerland             | Univ Sydney, Plant Breed Inst Cobbitty, Fac Agric Food & Nat Resour, Australia<br>Victorian AgriBiosci Ctr, Australia<br>Univ Zürich, Inst Plant Biol, Switzerland                                                                                                      | Bansal UK, Hayden MJ, Keller B et al. 2009. Relationship between wheat rust resistance genes <i>Yr1</i> and <i>Sr48</i> and a microsatellite marker. Plant Pathol 58(6): 1039-43.                                                             |
| 259. Wheat | Leaf rust<br>Stem rust       | Bulgaria                             | AgroBioInst                                                                                                                                                                                                                                                             | Todorovska E, Christov N, Slavov S et al. 2009. Biotic stress resistance in wheat – breeding and genomic selection implications. Biotechnol Biotech Eq 23(4): 1417-26. (Review)                                                               |
| 260. Wheat | Leaf rust<br>Stem rust       | India                                | Indian Agr Res Inst, Div Genet                                                                                                                                                                                                                                          | Prabhu KV, Singh AK, Basavaraj SH et al. 2009. Marker assisted selection for biotic stress resistance in wheat and rice. Indian J Genet Pl Br 69(4): 305-14. (Review)                                                                         |
| 261. Wheat | Leaf rust<br>Stem rust       | Pakistan                             | Bahauddin Zakariya Univ: Inst Biotechnol; Inst Pure & Appl Biol, Multan<br>BZ Univ Multan Pakistan, Univ Coll Agric                                                                                                                                                     | Babar M, Mashhadi AF, Mehvish A et al. 2010. Identification of rust resistance genes <i>Lr10</i> and <i>Sr9a</i> in Pakistani wheat germplasm using PCR based molecular markers. African J Biotechnol 9(8): 1144-50.                          |



|                      |                                                         |                           |                                                                                                                                        |                                                                                                                                                                                                                                         |
|----------------------|---------------------------------------------------------|---------------------------|----------------------------------------------------------------------------------------------------------------------------------------|-----------------------------------------------------------------------------------------------------------------------------------------------------------------------------------------------------------------------------------------|
| 262. Wheat           | Leaf rust<br>Stem rust                                  | India                     | Indian Agr Res Inst, Reg Stn<br>Directorate Wheat Res, Reg Stn                                                                         | Brahma RN, Saikia A, Datta D et al. 2007. Development of new wheat ( <i>Triticum aestivum</i> ) lines with pyramided leaf rust ( <i>Puccinia triticina</i> ) resistance genes. Indian J Agr Sci 77(12): 834-39.                         |
| 263. Wheat<br>Barley | Stem rust<br>Leaf rust<br>Stripe rust                   | USA                       | Univ Minnesota: Dept Plant Pathol; USDA-ARS, Cereal Dis Lab; Dept Agron                                                                | Steffenson BJ, Olivera P, Roy JK et al. 2007. A walk on the wild side: Mining wild wheat and barley collections for rust resistance genes. Aust J Agr Res 58(6): 532-44.                                                                |
| 264. Wheat           | Stem rust<br>Leaf rust<br>Stripe rust                   | USA                       | Univ Calif Davis, Dept Plant Sci                                                                                                       | Lowe, I., Cantu, D. and Dubcovsky, J. (2011). Durable resistance to the wheat rusts: integrating systems biology and traditional phenotype-based research methods to guide the deployment of resistance genes. Euphytica 179(1): 69-79. |
| 265. Wheat           | Stem rust<br>Leaf rust<br>Stripe rust                   | USA                       | Iowa State Univ, USDA-ARS, Dept Plant Pathol & Microbiol, Ctr Plant Responses Environm Stresses                                        | Ballini E, Lauter N, Wise R. 2013. Prospects for advancing defense to cereal rusts through genetical genomics. Front Plant Sci 4:117. (Review)                                                                                          |
| 266. Wheat           | Stem rust<br>Leaf rust<br>Stripe rust                   | Pakistan                  | AAARI, Wheat Res Inst<br>Univ Agr Faisalabad: Dept Plant Breeding & Genet; Ctr Agr Biochem & Biotechnol                                | Rehman AU, Sajjad M, Khan SH, Ahmad N. 2013. Prospects of wheat breeding for durable resistance against brown, yellow and black rust fungi. Int J Agric Biol 15(6): 1209-20. (Review)                                                   |
| 267. Wheat           | Stem rust<br>Leaf rust<br>Stripe rust                   | South Africa<br>Australia | CenGen Pty Ltd, South Africa<br>Univ Free State, Dept Plant Sci, South Africa<br>Univ So Queensland, Ctr Syst Biol, Fac Sci, Australia | Prins R, Pretorius ZA, Bender CM et al. 2011. QTL mapping of stripe, leaf and stem rust resistance genes in a Kariega x Avocet S doubled haploid wheat population. Mol Breeding 27(2): 259-70.                                          |
| 268. Wheat           | Stem rust<br>Leaf rust<br>Stripe rust                   | Pakistan                  | COMSATS Inst Informat Technol, Dept Biosci<br>PMAS Arid Agric Univ, Dept Genet & Plant Breed<br>Quaid-I-Azam Univ, Dept Microbiol      | Zeb M, Shah MKN, Faryal R. 2013. Development of putative molecular markers to trace durable rust resistance genes in wheat breeding stocks. Pakist J Bot 45: 359-66.                                                                    |
| 269. Wheat           | Stem rust<br>Leaf rust<br>Stripe rust                   | Australia                 | CSIRO Plant Ind                                                                                                                        | Lagudah ES. 2011. Molecular genetics of race non-specific rust resistance in wheat. Euphytica 179(1): 81-91.                                                                                                                            |
| 270. Wheat           | Stem rust<br>Leaf rust<br>Stripe rust                   | Canada                    | Agric & Agri-Food Canada: Semiarid Prairie Agric Res Ctr; Cereal Res Ctr; Lethbridge Res Ctr                                           | Singh A, Pandey MP, Singh AK et al. 2013. Identification and mapping of leaf, stem and stripe rust resistance quantitative trait loci and their interactions in durum wheat. Mol Breed 31(2): 405-18.                                   |
| 271. Wheat           | Stem rust<br>Leaf rust<br>Stripe rust                   | Australia                 | Univ Sydney PBI-Cobbitty, Fac Agric & Environ<br>Univ Queensland, School Agric & Food Sci                                              | Bansal UK, Arief VN, DeLacy IH, Bariana HS. 2013. Exploring wheat landraces for rust resistance using a single marker scan. Euphytica 194(2): 219-33.                                                                                   |
| 272. Wheat           | Stem rust<br>Leaf rust<br>Stripe rust<br>Powdery mildew | Canada                    | Agric & Agri-Food Canada, Cereal Res Ctr<br>Vineland Res & Innovat Ctr                                                                 | McCallum BD, Humphreys DG, Somers DJ et al. 2012. Allelic variation for the rust resistance gene <i>Lr34/Yr18</i> in Canadian wheat cultivars. Euphytica 183(2): 261-74.                                                                |
| 273. Wheat           | Stem rust<br>Leaf rust<br>Barley yellow dwarf virus     | Australia<br>Mexico       | CSIRO Plant Ind, Australia<br>Univ Sydney, Plant Breed Inst Cobbitty, Australia<br>CIMMYT, Mexico                                      | Ayala-Navarrete L, Bariana HS, Singh R et al. 2007. Trigenomic chromosomes by recombination of <i>Thinopyrum intermedium</i> and <i>Th. ponticum</i> translocations in wheat. Theor Appl Genet 116(1): 63-75.                           |

|            |                                                                                                                                   |                 |                                                                                                                                                                                                                                                                                                                                                                                            |                                                                                                                                                                                                                                                                                                                                                              |
|------------|-----------------------------------------------------------------------------------------------------------------------------------|-----------------|--------------------------------------------------------------------------------------------------------------------------------------------------------------------------------------------------------------------------------------------------------------------------------------------------------------------------------------------------------------------------------------------|--------------------------------------------------------------------------------------------------------------------------------------------------------------------------------------------------------------------------------------------------------------------------------------------------------------------------------------------------------------|
| 274. Wheat | Stem rust<br>Leaf rust<br>BYDV                                                                                                    | Australia       | CSIRO Plant Ind                                                                                                                                                                                                                                                                                                                                                                            | Ayala-Navarrete LI, Mechanicos AA., Gibson JM et al. 2013. The <i>Pontin</i> series of recombinant alien translocations in bread wheat: single translocations integrating combinations of <i>Bdv2</i> , <i>Lr19</i> and <i>Sr25</i> disease-resistance genes from <i>Thinopyrum intermedium</i> and <i>Th. ponticum</i> . Theor Appl Genet 126(10): 2467-75. |
| 275. Wheat | Stem rust<br>Leaf rust<br>Stripe rust<br>Fusarium head blight<br>Common bunt<br>Orange wheat blossom midge                        | Canada          | Agric & Agri-Food Canada: Lethbridge Res Ctr; Cereal Res Ctr<br>Univ Saskatchewan, Ctr Crop Dev; Dept Plant Sci<br>Univ Alberta<br>Semiarid Prairie Agricul Res Ctr                                                                                                                                                                                                                        | Randhawa HS, Asif M, Pozniak C et al. 2013. Application of molecular markers to wheat breeding in Canada. Plant Breeding 132(5): 458-71.                                                                                                                                                                                                                     |
| 276. Wheat | Stem rust<br>Leaf rust<br>Stripe rust<br>Powdery mildew<br>Greenbug                                                               | Iran            | Tarbiat Modares Univ, Fac Agric, Plant Breed & Biotechnol Dept<br>Agron & Plant Breed Dept, Coll Agric                                                                                                                                                                                                                                                                                     | Tabibzadeh N, Karimzadeh G, Naghavi MR. 2013. Distribution of 1AL.1RS and 1BL.1RS wheat-rye translocations in iranian wheat, using PCR based markers and SDS-page. Cereal Res Commun 41(3): 458-67.                                                                                                                                                          |
| 277. Wheat | Stem rust<br>Leaf rust<br>Stripe rust<br>Powdery mildew<br>Pest (cereal cyst nematode, root knot nematode, Hessian fly, greenbug) | Hungary         | Hungarian Acad Sci, Agricul Res Inst                                                                                                                                                                                                                                                                                                                                                       | Schneider A, Molnar I, Molnar-Lang M. 2008. Utilisation of <i>Aegilops</i> (goatgrass) species to widen the genetic diversity of cultivated wheat. Euphytica 163(1): 1-19.                                                                                                                                                                                   |
| 278. Wheat | Stem rust<br>Leaf rust<br>Stripe rust                                                                                             | Australia       | USPBI Cobbitty, Fac Agric & Nat Resour<br>USPBI Narrabri, Australian Grain Technol                                                                                                                                                                                                                                                                                                         | Bariana HS, Brown GN, Bansal UK et al. 2007. Breeding triple rust resistant wheat cultivars for Australia using conventional and marker-assisted selection technologies. Aust J Agr Res 58(6): 576-87.                                                                                                                                                       |
| 279. Wheat | Stem rust<br>Leaf rust<br>Powdery mildew                                                                                          | India           | IARI: Reg Stn, Div Genet<br>Devi Ahilya Vishwa                                                                                                                                                                                                                                                                                                                                             | Sivasamy M, Vinod, Tiwari S et al. 2009. Introgression of useful linked genes for resistance to stem rust, leaf rust and powdery mildew and their molecular validation in wheat ( <i>Triticum aestivum</i> L.). Indian J Genet Pl Br 69(1): 17-27.                                                                                                           |
| 280. Wheat | Stem rust<br>Stripe rust<br>Powdery mildew<br>Wheat curl mite                                                                     | China<br>Canada | CAAS: Natl Key Facil Crop Gene Resour & Genet Improv, Inst Crop Sci; Inst Plant Protect, Key Lab Biol Plant Dis & Insect Pests, China<br>Agric & Agri-Food Canada: Morden Res Stn; Lethbridge Res Ctr, Canada<br>China Agricul Univ, Dept Plant Genet & Breed, China<br>CAS, Inst Genet & Dev Biol, State Key Lab Plant Cell & Chromosome Engineer, China<br>Lankao Nonghua Seed Co, China | Li H J, Conner RL, Liu ZY et al. 2007. Characterization of wheat-triticale lines resistant to powdery mildew, stem rust, stripe rust, wheat curl mite, and limitation on spread of WSMV. Plant Dis 91(4): 368-74.                                                                                                                                            |

|                      |                                                                                                  |                                          |                                                                                                                                                                                                                                                                                                                                                                |                                                                                                                                                                                                                                                                                                                                                |
|----------------------|--------------------------------------------------------------------------------------------------|------------------------------------------|----------------------------------------------------------------------------------------------------------------------------------------------------------------------------------------------------------------------------------------------------------------------------------------------------------------------------------------------------------------|------------------------------------------------------------------------------------------------------------------------------------------------------------------------------------------------------------------------------------------------------------------------------------------------------------------------------------------------|
| 281. Wheat           | Stem rust<br>Leaf rust<br>Stripe rust<br>Powdery mildew                                          | Mexico<br>Norway<br>Australia<br>Uruguay | CIMMYT, Mexico<br>Norwegian Univ Life Sci, Dept Plant & Environm Sci, Norway<br>Univ Sydney, Australia<br>Univ Republ Uruguay, Fac Agron, Uruguay<br>Russian Acad Sci: Siberian Branch, Inst Cytol & Genet; VA Engelhardt<br>Mol Biol Inst, Russia<br>Natl Acad Sci Belarus, Inst Cytol & Genet, Belarus<br>Leibniz Inst Plant Genet & Crop Plant Res, Germany | Crossa J, Burgueno J, Dreisigacker S et al. 2007. Association analysis of historical bread wheat germplasm using additive genetic covariance of relatives and population structure. <i>Genetics</i> 177(3): 1889-913.                                                                                                                          |
| 282. Wheat           | Stem rust<br>Leaf rust<br>Powdery mildew<br>Septoria leaf blotch                                 | Russia<br>Belarus<br>Germany             | Univ Elect Sci & Technol China, Sch Life Sci & Technol<br>Univ Hebei, Coll Plant Protect                                                                                                                                                                                                                                                                       | Leonova IN, Badaeva ED, Orlovskaya OA et al. 2013. Comparative characteristic of <i>Triticum aestivum</i> / <i>Triticum durum</i> and <i>Triticum aestivum</i> / <i>Triticum dicoccum</i> hybrid lines by genomic composition and resistance to fungal diseases under different environmental conditions. <i>Russ J Genet</i> 49(11): 1112-18. |
| 283. Wheat           | Stem rust<br>Powdery mildew                                                                      | China                                    | Univ Elect Sci & Technol China, Sch Life Sci & Technol<br>Univ Hebei, Coll Plant Protect                                                                                                                                                                                                                                                                       | Liu C, Li GR, Yan HF et al. 2011. Molecular and cytogenetic identification of new wheat- <i>Dasypyrum breviaristatum</i> additions conferring resistance to stem rust and powdery mildew. <i>Breed Sci</i> 61(4): 366-72.                                                                                                                      |
| 284. Wheat           | Stripe rust<br>Leaf rust<br>Powdery mildew<br>Leaf tip necrosis phenotype                        | Australia<br>Mexico<br>China             | CSIRO Plant Ind, Australia<br>CIMMYT, Mexico<br>Univ Sydney, Plant Breed Inst, Australia<br>Campo Experim Valle Mexico INIFAP, Mexico<br>CAAS, China<br>Murdoch Univ, Ctr Comparat Genom, Australia                                                                                                                                                            | Spielmeyer W, Singh RP, McFadden H et al. 2008. Fine scale genetic and physical mapping using interstitial deletion mutants of <i>Lr34/Yr18</i> : A disease resistance locus effective against multiple pathogens in wheat. <i>Theor Appl Genet</i> 116(4): 481-90.                                                                            |
| 285. Wheat           | Stem rust<br>Leaf rust<br>Powdery mildew<br>Spot blotch<br>Loose smut                            | Russia<br>Germany                        | Inst Cytol & Genet SB RAS, Russia<br>Leibniz Inst Plant Genet & Crop Plant Res, Germany                                                                                                                                                                                                                                                                        | Leonova IN, Budashkina EB, Kalinina NP et al. 2011. <i>Triticum aestivum</i> – <i>Triticum timopheevii</i> introgression lines as a source of pathogen resistance genes. <i>Czech J Genet Plant Breed</i> 47: S49-S55.                                                                                                                         |
| 286. Wheat<br>Barley | Wheat rusts<br>Eyespot<br>Fusarium head blight<br>Barley yellow mosaic viruses<br>Powdery mildew | Germany                                  | Univ Hohenheim, State Plant Breed Inst<br>KWS LOCHOW GmbH                                                                                                                                                                                                                                                                                                      | Miedaner T, Korzun V. 2012. Marker-assisted selection for disease resistance in wheat and barley breeding. <i>Phytopathology</i> 102(6): 560-66.                                                                                                                                                                                               |
| 287. Wheat<br>Barley | Leaf rust<br>Barley yellow dwarf virus                                                           | Slovakia<br>Germany                      | Slovak Agric Res Ctr, Res Inst Plant Product, Slovakia<br>Inst Epidemiology & Resistance, Germany<br>Hordeum s.r.o., Slovakia<br>Slovak Univ, Technol Inst Biochem, Nutrition & Health Protect, Fac Chemical & Food Technol, Slovakia                                                                                                                          | Hudcovicova M, Sudyova V, Slikova S et al. 2008. Marker-assisted selection for the development of improved barley and wheat lines. <i>Acta Agron Hung</i> 56(4): 385-92.                                                                                                                                                                       |
| 288. Wheat           | Karnal bunt                                                                                      | India                                    | CCS Haryana Agricul Univ, Dept Biotechnol & Mol Biologic, Dept Geneti, Dept Plant Physiol, Dept Biochem<br>GB Pant Univ Agric & Technol, Dept Plant Breed                                                                                                                                                                                                      | Kumar M, Luthra OP, Chawla V et al. 2006. Identification of RAPD markers linked to the karnal bunt resistance genes in wheat. <i>Biol Plantarum</i> 50(4): 755-58.                                                                                                                                                                             |
| 289. Wheat           | Karnal bunt                                                                                      | USA                                      | USDA-ARS, Dale Bumpers Natl Rice Res Ctr<br>Kansas State Univ, Dept Plant Pathol<br>N Carolina State Univ, USDA-ARS, Plant Sci Res                                                                                                                                                                                                                             | Brooks SA, See DR, Brown-Guedira G. 2006. SNP-based improvement of a microsatellite marker associated with Karnal bunt resistance in wheat. <i>Crop Sci</i> 46(4): 1467-70.                                                                                                                                                                    |

|            |                      |                          |                                                                                                                                                              |                                                                                                                                                                                                                                                        |
|------------|----------------------|--------------------------|--------------------------------------------------------------------------------------------------------------------------------------------------------------|--------------------------------------------------------------------------------------------------------------------------------------------------------------------------------------------------------------------------------------------------------|
| 290. Wheat | Karnal bunt          | India<br>USA             | Kansas State Univ, Dept Plant Pathol, USA<br>Punjab Agricul Univ, Dept Plant Breed, Genet & Biotechnol, India<br>USDA-ARS, Plant Sci & Entomol Res Unit, USA | Singh S, Sharma I, Sehgal SK et al. 2007. Molecular mapping of QTLs for Karnal bunt resistance in two recombinant inbred populations of bread wheat. <i>Theor Appl Genet</i> 116(1): 147-54.                                                           |
| 291. Wheat | Bunt                 | Romania                  | Natl Agr Res & Dev Inst Fundulea                                                                                                                             | Ciucu M. 2011. A Preliminary report on the identification of SSR markers for bunt ( <i>Tilletia</i> sp.) resistance in wheat. <i>Czech J Genet Plant Breed</i> 47: S142-S45.                                                                           |
| 292. Wheat | Common bunt          | Canada                   | Agric & Agri-Food Canada                                                                                                                                     | Knox RE, Campbell HL, Depauw RM et al. 2013. DNA markers for resistance to common bunt in 'McKenzie' wheat. <i>Can J Plant Pathol</i> 35(3): 328-37.                                                                                                   |
| 293. Wheat | Common bunt          | China<br>Canada          | Shenyang Agricul Univ, Coll Agron, China<br>Agric & Agri-Food Canada: Semiarid Prairie Agricul Res Ctr; Cereal Res Ctr, Canada                               | Wang S, Knox RE, DePauw RM et al. 2009. Markers to a common bunt resistance gene derived from 'Blizzard' wheat ( <i>Triticum aestivum</i> L.) and mapped to chromosome arm 1BS. <i>Theor Appl Genet</i> 119(3): 541-53.                                |
| 294. Wheat | Smut                 | Canada                   | Univ Saskatchewan, Crop Development Ctr<br>Agric & Agri-Food Canada: Lethbridge Res Ctr; Cereal Res Ctr<br>Semiarid Prairie Agricul Res Ctr, Swift Current   | Randhawa HS, Popovic Z, Menzies J et al. 2009. Genetics and identification of molecular markers linked to resistance to loose smut ( <i>Ustilago tritici</i> ) race T33 in durum wheat. <i>Euphytica</i> 169(2): 151-57.                               |
| 295. Wheat | Flag smut            | Australia                | Univ Sydney, Plant Breed Inst, Australia                                                                                                                     | Toor A, Bansal U, Bariana H. 2013. Mapping of flag smut resistance in common wheat. <i>Mol Breeding</i> 32(3): 699-707.                                                                                                                                |
| 296. Wheat | Fusarium head blight | Austria<br>Mexico<br>USA | BOKU, Univ Nat Resour & Appl Life Sci, Dept IFA, Austria<br>CIMMYT, Mexico<br>Univ Minnesota, Dept Agron & Plant Genet, USA                                  | Buerstmayr H, Ban T, Anderson JA. 2008. QTL mapping and marker-assisted selection for Fusarium head blight resistance in wheat. <i>Cereal Res Commun</i> 36(Supl. B): 1-3.                                                                             |
| 297. Wheat | Fusarium head blight | Canada                   | Univ Manitoba, Dept Plant Sci<br>Agric & Agri-Food Canada, Cereal Res Ctr                                                                                    | Cuthbert PA, Somers DJ, Brulé-Babel A. 2007. Mapping of <i>Fhb2</i> on chromosome 6BS: a gene controlling Fusarium head blight field resistance in bread wheat ( <i>Triticum aestivum</i> L.). <i>Theor Appl Genet</i> 114(3): 429-37.                 |
| 298. Wheat | Fusarium head blight | Canada                   | Agric & Agri-Food Canada: Cereal Res Ctr, Eastern Cereals Oilseeds Res Ctr, Semiarid Prairie Agricul Res                                                     | McCartney CA, Somers DJ, Fedak G et al. 2007. The evaluation of FHB resistance QTLs introgressed into elite Canadian spring wheat germplasm. <i>Mol Breeding</i> 20(3): 209-21.                                                                        |
| 299. Wheat | Fusarium head blight | China<br>Australia       | Jiangsu Acad Agricul Sci, Inst Biotechnol, China<br>CAS, Inst Crop Sci, China<br>PMB1, Mol Plant Breed CRC, Australia                                        | Zhou MP, Hayden MJ, Zhang ZY et al. 2010. Saturation and mapping of a major Fusarium head blight resistance QTL on chromosome 3BS of Sumai 3 wheat. <i>J Appl Genet</i> 51(1): 19-25.                                                                  |
| 300. Wheat | Fusarium head blight | China                    | Nanjing Agric Univ, Cytogenet Inst, Natl Key Lab Crop Genet & Germplasm Enhancement                                                                          | Lang SP, Wang HY, Xu HY et al. 2008. Molecular marker-assisted selection of wheat germplasm with pyramided Fusarium head blight ( <i>Gibberella zeae</i> ) resistance and good HMW subunits for bread-making quality. <i>J Tritic Crops</i> 3: 415-18. |
| 301. Wheat | Fusarium head blight | China                    | Nanjing Agric Univ, Coll of Agron                                                                                                                            | Du JK, Yu GH, Wang Xiu E, Ma HX. 2010. Development and validation of a SSCP marker for Fusarium head blight resistance QTL region in wheat. <i>J Tritic Crops</i> 5: 829-834.                                                                          |

|            |                      |                                 |                                                                                                                                                                   |                                                                                                                                                                                                                                                                                 |
|------------|----------------------|---------------------------------|-------------------------------------------------------------------------------------------------------------------------------------------------------------------|---------------------------------------------------------------------------------------------------------------------------------------------------------------------------------------------------------------------------------------------------------------------------------|
| 302. Wheat | Fusarium head blight | China                           | Jiangsu Acad Agricul Sci, Inst Biotechnol                                                                                                                         | M HX, Yao JB, Zhou MP et al. 2008. Molecular breeding for wheat Fusarium head blight resistance in China. Cereal Res Commun 36 (Suppl. B): 203-212.                                                                                                                             |
| 303. Wheat | Fusarium head blight | China                           | Jiangsu Acad Agricul Sci, Inst Agrobiotechnol                                                                                                                     | Lu WZ, Ma HX, Zhang X et al. 2008. Application of molecular markers for marker-assisted selection on wheat Fusarium head blight resistance. Cereal Res Commun 36 (Suppl. B): 127-129.                                                                                           |
| 304. Wheat | Fusarium head blight | Czech Republic                  | Crop Res Inst                                                                                                                                                     | Chrpova J, Sip V, Stockova L et al. 2010. Resistance sources against Fusarium head blight and their use in wheat breeding. Disease Resistance in Cereals (Proceedings): 21-29.                                                                                                  |
| 305. Wheat | Fusarium head blight | Czech Republic                  | SELGEN a.s.<br>Res Ctr SELTON Ltd.<br>Crop Res Inst                                                                                                               | Horcicka P, Hanisova A, Rehorova K et al. 2010. Utilization of molecular markers in Czech wheat breeding programmes. 60. Jahrestagung der Vereinigung der Pflanzenzüchter und Saatgutkaufleute Österreichs 2009. 61-64.                                                         |
| 306. Wheat | Fusarium head blight | Germany                         | JKI, Fed Res Ctr Cultivated Plants, Inst Resistance Res & Stress Tolerance                                                                                        | Perovic D, Forster J, Welz G et al. 2008. Marker-assisted wheat improvement: Creating semi-dwarf phenotypes with superior Fusarium head blight resistance. Cereal Res Commun 36(Suppl.B): 153-155.                                                                              |
| 307. Wheat | Fusarium head blight | Hungary                         | Cereal Res Non Profit Co<br>Univ Szeged, Fac Sci & Informatics, Dept Plant Biol                                                                                   | Szabo-Hever A, Toth B, Lehoczki-Krsjak S, Mesterhazy A. 2008. Mapping of FHB resistance QTLs in the Mini Mano/Frontana and Frontana/Remus DH populations. Cereal Res Commun 36(Suppl. 6): 271-75.                                                                               |
| 308. Wheat | Fusarium head blight | Iran                            | Urmia Univ, Coll Agric                                                                                                                                            | Hosseinzadeh AH, Bernousi I, Mardi M et al. 2009. Identification of SSR markers linked to QTL for Fusarium head blight resistance in wheat. Journal of Science and Technology of Agriculture and Natural Resources, Water and Soil Science 13(47): 669-76.                      |
| 309. Wheat | Fusarium head blight | Austria<br>Israel               | BOKU, Univ Nat Resour & Appl Life Sci: Dept IFA Tulln, Inst Biotech in Plant Produc, Dep Appl Plant Sci and Plant Biotechnol, Austria<br>Hebron Univ, Israël      | Salameh A, Almaghrabi B, Buerstmayr H. 2008. Development and evaluation of winter wheat breeding lines carrying Fusarium head blight resistance QTL derived from spring wheat. 60. Jahrestagung der Vereinigung der Pflanzenzüchter und Saatgutkaufleute Österreichs 2009. 191. |
| 310. Wheat | Fusarium head blight | USA                             | S Dakota State Univ, Dept Plant Sci                                                                                                                               | Rosyara UR, Gonzalez-Hernandez JL, Glover KD et al. 2009. Family-based mapping of quantitative trait loci in plant breeding populations with resistance to Fusarium head blight in wheat as an illustration. Theor Appl Genet 118(8): 1617-31.                                  |
| 311. Wheat | Fusarium head blight | USA<br>Czech Republic<br>France | Univ Minnesota, Dept Agron & Plant Genet, USA<br>Kansas State Univ: USDA-ARS, Plant Pathol Dept, USA<br>Inst. Experim Botany, Czech Republic<br>URGV-INRA, France | Liu SX, Pumphrey MO, Gill BS et al. 2008. Toward positional cloning of <i>Fhb1</i> , a major QTL for Fusarium head blight resistance in wheat. Cereal Res Commun 36(Suppl. 6): 195-201.                                                                                         |
| 312. Wheat | Fusarium head blight | USA                             | Univ Minnesota, Dept Agron & Plant Genet                                                                                                                          | Anderson JA. 2007. Marker-assisted selection for Fusarium head blight resistance in wheat. Int J Food Microbiol 119(1-2): 51-53.                                                                                                                                                |

|            |                      |                               |                                                                                                                                                                                                                                                                |                                                                                                                                                                                                                                                                                      |
|------------|----------------------|-------------------------------|----------------------------------------------------------------------------------------------------------------------------------------------------------------------------------------------------------------------------------------------------------------|--------------------------------------------------------------------------------------------------------------------------------------------------------------------------------------------------------------------------------------------------------------------------------------|
| 313. Wheat | Fusarium head blight | USA<br>China                  | Kansas State Univ: Dept Plant Pathol; Dept Agron, USA<br>JAAS, Plant Genet & Biotechnol, China<br>USDA-ARS, Hard Winter Wheat Genet Res Unit, USA                                                                                                              | Bernardo AN, Ma HX, Zhang DD, Bai GH. 2012. Single nucleotide polymorphism in wheat chromosome region harboring <i>Fhb1</i> for Fusarium head blight resistance. <i>Mol Breeding</i> 29(2): 477-88.                                                                                  |
| 314. Wheat | Fusarium head blight | Mexico<br>Norway<br>China     | CIMMYT, Global Wheat Program, Mexico<br>Norwegian Univ Life Sci, Dept Plant & Environm Sci, Norway<br>CIMMYT China Off, China                                                                                                                                  | He XY, Singh PK, Schlang N et al. 2014. Characterization of Chinese wheat germplasm for resistance to Fusarium head blight at CIMMYT, Mexico. <i>Euphytica</i> 195(3): 383-95.                                                                                                       |
| 315. Wheat | Fusarium head blight | USA                           | North Dakota State Univ, Dept Plant Pathol,<br>Heartland Plant Innovations Inc.<br>USDA-ARS, Northern Crop Sci Lab<br>North Dakota State Univ: Langdon Res Extension Ctr; Dept Plant Sci<br>Univ Minnesota, Dept Plant Pathol                                  | Chu C, Niu Z, Zhong S et al. 2011. Identification and molecular mapping of two QTLs with major effects for resistance to Fusarium head blight in wheat. <i>Theor Appl Genet</i> 123(7): 1107-119.                                                                                    |
| 316. Wheat | Fusarium head blight | Canada<br>Japan               | Agric & Agri-Food Canada, Cereal Res Ctr, Canada<br>Yokohama City Univ, Kihara Inst Biologic Res, T. Ban. Division Plant Genetic Resour Sci, Japan                                                                                                             | Golkari S, Gilbert J, Ban T, Procnunier JD. 2009. QTL-specific microarray gene expression analysis of wheat resistance to Fusarium head blight in Sumai-3 and two susceptible NILs. <i>Genome</i> 52(5): 409-18.                                                                     |
| 317. Wheat | Fusarium head blight | Germany<br>Austria            | Helmholtz Ctr Munich, Munich Information Ctr Protein Sequences, Inst Bioinformatics & Systems Biol, Germany<br>Univ Natural Resour & Life Sci, Inst Biotechnol Plant Production, IFA-Tulln, Austria                                                            | Kugler KG, Siegwart G, Nussbaumer T et al. 2013. Quantitative trait loci-dependent analysis of a gene co-expression network associated with Fusarium head blight resistance in bread wheat ( <i>Triticum aestivum</i> L.). <i>BMC Genomics</i> 14(1): 728.                           |
| 318. Wheat | Fusarium head blight | USA<br>China                  | Kansas State Univ, Wheat Genetic & Genomic Resour Ctr, Dept Plant Pathol, USA<br>USDA-ARS, Plant Sci & Entomol Res Unit, USA<br>Nanjing Agricul Univ, Natl Key Lab Crop Genet & Germplasm Enhancement, China                                                   | Qi LL, Pumphrey MO, Friebe B et al. 2008. Molecular cytogenetic characterization of alien introgressions with gene <i>Fhb3</i> for resistance to Fusarium head blight disease of wheat. <i>Theor Appl Genet</i> 117(7): 1155-66.                                                     |
| 319. Wheat | Fusarium head blight | USA                           | Univ Kentucky. Dept Plant & Soil Sci<br>USDA-ARS, Plant Sci Res Unit<br>USDA-ARS, Soft Wheat Quality Lab                                                                                                                                                       | Balut AL, Clark AJ, Brown-Guedira G et al. 2013. Validation of <i>Fhb1</i> and <i>QFhs.nau-2DL</i> in several soft red winter wheat populations. <i>Crop Sci</i> 53(3): 934-45.                                                                                                      |
| 320. Wheat | Fusarium head blight | Austria<br>Palestina          | BOKU-Univ Natural Resour & Life Sci; Dept Agrobiotechnol, Austria<br>Minist Agric, Natl Agricul Res Center (NARC) Jenin, Palestine                                                                                                                             | Buerstmayr M, Alimari A, Steiner B, Buerstmayr H. 2013. Genetic mapping of QTL for resistance to Fusarium head blight spread (type 2 resistance) in a <i>Triticum dicoccoides</i> x <i>Triticum durum</i> backcross-derived population. <i>Theor Appl Genet</i> 126(11): 2825-34.    |
| 321. Wheat | Fusarium head blight | Austria<br>Netherlands<br>USA | BOKU-Univ Natural Resour & Life Sci; Dept Agrobiotechnol, Austria<br>Presse & Informationsdienst Agrarisches Informationszentrum (AIZ), Austria<br>Rijk Zwaan Nederland B.V., Burgemeester Crezélaan, Netherlands<br>Kansas State Univ, Dept Plant Pathol, USA | Buerstmayr M, Huber K, Heckmann J et al. 2012. Mapping of QTL for Fusarium head blight resistance and morphological and developmental traits in three backcross populations derived from <i>Triticum dicoccum</i> x <i>Triticum durum</i> . <i>Theor Appl Genet</i> 125(8): 1751-65. |

|            |                      |                                     |                                                                                                                                                                                                                                                                                                                                                                                       |                                                                                                                                                                                                                                               |
|------------|----------------------|-------------------------------------|---------------------------------------------------------------------------------------------------------------------------------------------------------------------------------------------------------------------------------------------------------------------------------------------------------------------------------------------------------------------------------------|-----------------------------------------------------------------------------------------------------------------------------------------------------------------------------------------------------------------------------------------------|
| 322. Wheat | Fusarium head blight | Argentina                           | CIRN, INTA, Inst Recursos Biológicos<br>Univ. Nacional de Buenos Aires, Fac Agronomía, Cátedra de Genética                                                                                                                                                                                                                                                                            | Cativelli M, Lewis S, Appendino ML. 2013. A Fusarium head blight resistance quantitative trait locus on chromosome 7D of the spring wheat cultivar Catbird. <i>Crop Sci</i> 53(4): 1464-71.                                                   |
| 323. Wheat | Fusarium head blight | UK<br>Germany<br>Austria<br>Hungary | JIC, Norwich Res Park, UK<br>Natl Inst Agricul Botany (NIAB), UK<br>Saaten-union Resistenzlabor GmbH, Germany<br>Univ Natural Resour & Applied Life Sci, IFA-Tulln Biotechnol in Plant Production, Vienna Dept Agrobiotechnol, Austria<br>Technical Univ Munich, Chair Plant Breed, Germany<br>Cereal Res Non-profit Co.: Dept Biotechnol & Resistance Res; Wheat Breed Dept, Hungary | Draeger R, Gosman N, Steed A et al. 2007. Identification of QTLs for resistance to Fusarium head blight, DON accumulation and associated traits in the winter wheat variety Arina. <i>Theor Appl Genet</i> 115(5): 617-25.                    |
| 324. Wheat | Fusarium head blight | USA<br>Canada<br>Australia          | North Dakota State Univ: Dept Plant Sci; Dept Plant Pathol, USA<br>Univ Guelph, Ctr Genetic Improv Livestock, Canada<br>Grains Res & Develop Corporation (GRDC), Australia                                                                                                                                                                                                            | Ghavami F, Elias EM, Mamidi S et al. 2011. Mixed model association mapping for Fusarium head blight resistance in Tunisian-derived durum wheat populations. <i>G3: Genes, Genomes, Genetics</i> 1(3): 209-18.                                 |
| 325. Wheat | Fusarium head blight | Germany                             | Bavarian State Res Ctr Agric, Inst Crop Sci & Plant Breed<br>Saatzucht Josef Breun GdbR                                                                                                                                                                                                                                                                                               | Haberle J, Holzapfel J, Schweizer G, Hartl L. 2009. A major QTL for resistance against Fusarium head blight in European winter wheat. <i>Theor Appl Genet</i> 119(2): 325-32.                                                                 |
| 326. Wheat | Fusarium head blight | France                              | CAAS, Inst Crop Sci,: Key Lab Crop Gene Resour & Germplasm Enhancement, Minist Agric; Natl Key Facility Crop Gene Resour & Genetic Improv; China<br>INRA UMR 1095, Genet Diversity & Ecophysiol Cereals, France                                                                                                                                                                       | Hao C, Wang Y, Hou J et al. 2012. Association mapping and haplotype analysis of a 3.1-Mb genomic region involved in Fusarium head blight resistance on wheat chromosome 3BS. <i>Plos One</i> 7(10): e46444.                                   |
| 327. Wheat | Fusarium head blight | Germany                             | Bavarian State Res Ctr Agric, Inst Crop Sci & Plant Breed<br>Univ Hohenheim (720), State Plant Breed Inst<br>KWS LOCHOW GmbH                                                                                                                                                                                                                                                          | Holzapfel J, Voss HH, Miedaner T et al. 2008. Inheritance of resistance to Fusarium head blight in three European winter wheat populations. <i>Theor Appl Genet</i> 117(7): 1119-28.                                                          |
| 328. Wheat | Fusarium head blight | USA                                 | Kansas State Univ, Dept Agron,<br>USDA-ARS Hard Winter Wheat Genetic Res Unit<br>Univ Minnesota, Dept Plant Pathol                                                                                                                                                                                                                                                                    | Jayatilake DV, Bai GH, Dong YH. 2011. A novel quantitative trait locus for Fusarium head blight resistance in chromosome 7A of wheat. <i>Theor Appl Genet</i> 122 (6): 1189-1198                                                              |
| 329. Wheat | Fusarium head blight | USA<br>China<br>Mexico              | Michigan State Univ, Dept Crop & Soil Sci, USA<br>Nanjing Agricul Univ, State Key Lab Crop Genet & Germplasm Enhancement, China<br>Jiangsu Acad Agricul Sci, China<br>CIMMYT Wheat Program, Mexico                                                                                                                                                                                    | Jiang GL, Shi J, Ward RW. 2007. QTL analysis of resistance to Fusarium head blight in the novel wheat germplasm CJ 9306. I. Resistance to fungal spread. <i>Theor Appl Genet</i> 116(1): 3-13.                                                |
| 330. Wheat | Fusarium head blight | USA<br>China<br>Mexico              | Michigan State Univ, Dept Crop & Soil Sci, USA<br>Nanjing Agricul Univ, State Key Lab Crop Genet & Germplasm Enhancement, China<br>Univ Minnesota, Dept Plant Pathol, USA<br>Jiangsu Acad Agricul Sci, China<br>CIMMYT Wheat Program, Mexico                                                                                                                                          | Jiang GL, Dong Y, Shi J, Ward RW. 2007. QTL analysis of resistance to Fusarium head blight in the novel wheat germplasm CJ 9306. II. Resistance to deoxynivalenol accumulation and grain yield loss. <i>Theor Appl Genet</i> 115(8): 1043-52. |
| 331. Wheat | Fusarium head        | Germany<br>France                   | Leibniz Inst Plant Genet & Crop Plant Res (IPK) , Germany                                                                                                                                                                                                                                                                                                                             | Kollers S, Rodemann B, Ling J et al. 2013. Whole genome association mapping of Fusarium head blight resistance in European winter wheat                                                                                                       |

|            |                      |                             |                                                                                                                                                                                                                                                                                                                                                                          |                                                                                                                                                                                                                                                            |
|------------|----------------------|-----------------------------|--------------------------------------------------------------------------------------------------------------------------------------------------------------------------------------------------------------------------------------------------------------------------------------------------------------------------------------------------------------------------|------------------------------------------------------------------------------------------------------------------------------------------------------------------------------------------------------------------------------------------------------------|
|            | blight               |                             | JKI, Germany<br>KWS LOCHOW GmbH, Germany<br>Syngenta Seeds S.A.S.,France<br>Syngenta Seeds GmbH, Germany<br>TraitGenet GmbH, Germany                                                                                                                                                                                                                                     | ( <i>Triticum aestivum</i> L.). Plos One 8(2): e57500.                                                                                                                                                                                                     |
| 332. Wheat | Fusarium head blight | USA                         | North Dakota State Univ: Dept Plant Sci; Dept Plant Pathol<br>USDA-ARS, Cereal Crops Res Unit, Northern Crop Sci Lab                                                                                                                                                                                                                                                     | Kumar S, Stack RW, Friesen TL, Faris JD. 2007. Identification of a novel Fusarium head blight resistance quantitative trait locus on chromosome 7A in tetraploid wheat. <i>Phytopathology</i> 97(5): 592-97.                                               |
| 333. Wheat | Fusarium head blight | China<br>USA                | Yangzhou Univ: Jiangsu Provincial Key Lab Crop Genet Physiology; Key Lab Plant Functional Genom Minist Educ, China<br>Kansas State Univ: Dept Plant Pathol; Dept Agron, USA<br>USDA-ARS, Hard Winter Wheat Genet Res Unit, USA                                                                                                                                           | Li T, Bai G, Wu S, Gu S. 2011. Quantitative trait loci for resistance to Fusarium head blight in a Chinese wheat landrace Haiyanzhong. <i>Theor Appl Genet</i> 122(8): 1497-502.                                                                           |
| 334. Wheat | Fusarium head blight | USA<br>Canada               | Univ Missouri-Columbia, Division Plant Sci, USA<br>Agric & Agri-Food Canada, Greenhouse Processing Crop Res Ctr, Canada<br>North Dakota State Univ, Dept Plant Sci, USA                                                                                                                                                                                                  | Liu S, Abate ZA, Lu H et al. 2007. QTL associated with Fusarium head blight resistance in the soft red winter wheat Ernie. <i>Theor Appl Genet</i> 115(3): 417-27.                                                                                         |
| 335. Wheat | Fusarium head blight | USA                         | Virginia Tech: Dept Crop & Soil Environm Sci; Dept Plant Pathol, Physiol & Weed Sci<br>Texas A&M Univ System, Texas A&M AgriLife Res & Extension Ctr<br>Limagrain Cereal Seeds<br>Univ Missouri, Dept Plant Sci<br>Univ Idaho Aberdeen Res & Extension Ctr, Dept Agron<br>USDA-ARS, Eastern Regional Small Grains Genotyping Lab<br>Univ Kentucky, Dept Plant & Soil Sci | Liu S, Griffey CA, Hall MD et al. 2013. Molecular characterization of field resistance to Fusarium head blight in two US soft red winter wheat cultivars. <i>Theor Appl Genet</i> 126(10): 2485-98.                                                        |
| 336. Wheat | Fusarium head blight | Belgium                     | Walloon Agricul Res Ctr, Life Sci Dept<br>Catholic Univ Louvain, Inst Life Sci                                                                                                                                                                                                                                                                                           | Muhovski Y, Batoko H, Jacquemin JM. 2012. Identification, characterization and mapping of differentially expressed genes in a winter wheat cultivar (Centenaire) resistant to <i>Fusarium graminearum</i> infection. <i>Mol Biol Rep</i> 39(10): 9583-600. |
| 337. Wheat | Fusarium head blight | Iran                        | Shahed Univ Tehran, Dep Agron & Crop Breed                                                                                                                                                                                                                                                                                                                               | Naji AM, Moghaddam M, Ghaffari MR et al. 2008. Validation of EST-derived STS markers localized on <i>Qfhs.ndsu-3Bs</i> for Fusarium head blight resistance in wheat using a 'Wangshuibai' derived population. <i>J Genet Genomics</i> 35(10): 625-29.      |
| 338. Wheat | Fusarium head blight | Canada                      | Univ Saskatchewan, Crop Development Ctr & Dept Plant Sci<br>Agric & Agri-Food Canada, Soils & Crops Res & Development Ctr                                                                                                                                                                                                                                                | Ruan Y, Comeau A, Langevin F et al. 2012. Identification of novel QTL for resistance to Fusarium head blight in a tetraploid wheat population. <i>Genome</i> 55(12): 853-64.                                                                               |
| 339. Wheat | Fusarium head blight | China<br>Japan              | Jiangsu Acad Agricul Sci, China<br>Japan Internatl Res Ctr Agricul Sci (JIRCAS), Biologic Resour Division                                                                                                                                                                                                                                                                | Shi JR, Xu DH, Yang HY et al. 2008. DNA marker analysis for pyramided of Fusarium head blight (FHB) resistance QTLs from different germplasm. <i>Genetica</i> 133(1): 77-84.                                                                               |
| 340. Wheat | Fusarium head blight | Australia<br>China<br>Japan | CSIRO Plant Ind, Queensland Biosci Precinct, Australia<br>Minis Educ, Jiangxi Agricul Univ, Key Lab Crop Physiol, Ecol & Genetic Breed, China                                                                                                                                                                                                                            | Li HB, Xie GQ, Ma J et al. 2010. Genetic relationships between resistances to Fusarium head blight and crown rot in bread wheat ( <i>Triticum aestivum</i> L.). <i>Theor Appl Genet</i> 121(5): 941-50.                                                    |



|            |                      |              |                                                                                                                                                                                                                                          |                                                                                                                                                                                                                                               |
|------------|----------------------|--------------|------------------------------------------------------------------------------------------------------------------------------------------------------------------------------------------------------------------------------------------|-----------------------------------------------------------------------------------------------------------------------------------------------------------------------------------------------------------------------------------------------|
|            |                      |              | Minist Agric, Key Lab Physiol, Eco & Cultivation Double Cropping Rice, China                                                                                                                                                             |                                                                                                                                                                                                                                               |
|            |                      |              | Univ Western Australia, Fac Natural & Agricul Sci, School of Plant Biol, Australia                                                                                                                                                       |                                                                                                                                                                                                                                               |
|            |                      |              | Hebei Agricul Univ, Fac Agric, China                                                                                                                                                                                                     |                                                                                                                                                                                                                                               |
|            |                      |              | Yokohama City Univ, Kihara Inst Biologic Res, Japan                                                                                                                                                                                      |                                                                                                                                                                                                                                               |
| 341. Wheat | Fusarium head blight | UK           | JKI, Norwich Res Park, Crop Genet<br>Natl Inst Agricul Botany (NIAB)                                                                                                                                                                     | Srinivasachary, Gosman N, Steed A et al. 2008. Susceptibility to Fusarium head blight is associated with the <i>Rht-D1b</i> semi-dwarfing allele in wheat. Theor Appl Genet 116(8): 1145-53.                                                  |
| 342. Wheat | Fusarium head blight | Japan        | Hokkaido Res Organization: Agricul Res Dept: Chuo Agricul Experim Strn;<br>Kitami Agricul Experiment Strn<br>Sato Professional Engineer's Off                                                                                            | Suzuki T, Sato M, Takeuchi T. 2012. Evaluation of the effects of five QTL regions on Fusarium head blight resistance and agronomic traits in spring wheat ( <i>Triticum aestivum</i> L.). Breed Sci 62(1): 11-17.                             |
| 343. Wheat | Fusarium head blight | USA          | USDA-ARS, Northern Crop Sci Lab                                                                                                                                                                                                          | Jauhar PP, Peterson TS, Xu SS. 2009. Cytogenetic and molecular characterization of a durum alien disomic addition line with enhanced tolerance to Fusarium head blight. Genome 52 (5): 467-83.                                                |
| 344. Wheat | Fusarium head blight | USA          | USDA-ARS, Northern Crop Sci Lab                                                                                                                                                                                                          | Jauhar PP, Peterson TS. 2013. Synthesis and characterization of advanced durum wheat hybrids and addition lines with <i>Thinopyrum</i> chromosomes. J Hered 104(3): 428-36.                                                                   |
| 345. Wheat | Fusarium head blight | China        | Nanjing Agricul Univ, Natl Key Lab Crop Genet & Germplasm Enhancement, Cytogenet Inst<br>Jiangsu Acad Agricul Sci<br>Yangzhou Acad Agricul Sci                                                                                           | Wang L, Yuan J, Bie T et al. 2009. Cytogenetic and molecular identification of three <i>Triticum aestivum-Leymus racemosus</i> translocation addition lines. J Genet Genomics 36(6): 379-85.                                                  |
| 346. Wheat | Fusarium head blight | China        | Nanjing Agricul Univ: Appl Plant Genom Lab Crop Genom & Bioinformatics Centre; Natl Key Lab Crop Genet and Germplasm Enhancement; Coll Agricul Sci                                                                                       | Xue S, Li G, Jia H et al. 2010. Fine mapping <i>Fhb4</i> , a major QTL conditioning resistance to Fusarium infection in bread wheat ( <i>Triticum aestivum</i> L.). Theor Appl Genet 121(1): 147-56.                                          |
| 347. Wheat | Fusarium head blight | Germany      | Univ Hohenheim, State Plant Breed Inst<br>Technical Univ Munich, Plant Breed<br>KWS LOCHOW GmbH<br>Bavarian State Res Ctr Agricul, Inst Crop Sci & Plant Breed                                                                           | Wilde F, Schon CC, Korzun V et al. 2008. Marker-based introduction of three quantitative-trait loci conferring resistance to Fusarium head blight into an independent elite winter wheat breeding population. Theor Appl Genet 117(1): 29-35. |
| 348. Wheat | Fusarium head blight | China        | Nanjing Agricul Univ, Crop Genom & Bioinformatics Ctr & Natl Key Lab Crop Genet & Germplasm Enhancement                                                                                                                                  | Xue S, Xu F, Tang M et al. 2011. Precise mapping <i>Fhb5</i> , a major QTL conditioning resistance to Fusarium infection in bread wheat ( <i>Triticum aestivum</i> L.). Theor Appl Genet 123(6): 1055-63.                                     |
| 349. Wheat | Fusarium head blight | China<br>USA | Shanghai Jiao Tong Univ: Plant Biotechnol Res Ctr; Fudan-SJTU-Nottingham Plant Biotechnol R&D Ctr; School Agric & Biol, China<br>Jiangsu Acad Agricul Sci, Inst Agricul Biotechnol, China<br>USDA-ARS, Plant Sci & Entomol Res Unit, USA | Yu GH, Ma HX, Bai GH, Tang KX. 2008. Single-strand conformational polymorphism markers associated with a major QTL for Fusarium head blight resistance in wheat. Mol Biol (Mosk) 42(4): 571-80.                                               |
| 350. Wheat | Fusarium head blight | USA          | Kansas State Univ, Dept Agron<br>USDA-ARS, Plant Sci & Entomol Res Unit<br>Univ Alberta, Dept Biologic Sci<br>Univ Minnesota, Dept Plant Pathol                                                                                          | Yu JB, Bai GH, Zhou WC et al. 2008. Quantitative trait loci for Fusarium head blight resistance in a recombinant inbred population of Wangshuibai/Wheaton. Phytopathology 98(1): 87-94.                                                       |

|            |                                                 |                    |                                                                                                                                                                                                                                                                      |                                                                                                                                                                                                                                                                         |
|------------|-------------------------------------------------|--------------------|----------------------------------------------------------------------------------------------------------------------------------------------------------------------------------------------------------------------------------------------------------------------|-------------------------------------------------------------------------------------------------------------------------------------------------------------------------------------------------------------------------------------------------------------------------|
| 351. Wheat | Fusarium head blight                            | USA                | North Dakota State Univ, Dept Plant Sci                                                                                                                                                                                                                              | Zhang G, Mergoum M. 2007. Molecular mapping of kernel shattering and its association with Fusarium head blight resistance in a Sumai3 derived population. Theor Appl Genet 115(6): 757-66.                                                                              |
| 352. Wheat | Fusarium head blight                            | China              | Sichuan Agricul Univ: Dept Plant Pathol; State Key Lab Plant Breed & Genetics                                                                                                                                                                                        | Zhang M, Zhang R, Yang J, Luo P. 2010. Identification of a new QTL for Fusarium head blight resistance in the wheat genotype "Wang shui-bai". Mol Biol Rep 37(2): 1031-35.                                                                                              |
| 353. Wheat | Fusarium head blight                            | China<br>USA       | Jilin Univ, Coll Plant Sci<br>Kansas State Univ, Dept Agron, USA<br>USDA-ARS, Hard Winter Wheat Genet Res Unit, USA                                                                                                                                                  | Zhang X, Pan H, Bai G. 2012. Quantitative trait loci responsible for Fusarium head blight resistance in Chinese landrace Baishanyuehuang. Theor Appl Genet 125(3): 495-502.                                                                                             |
| 354. Wheat | Fusarium head blight                            | USA                | South Dakota State Univ, Dept Biol & Microbiol                                                                                                                                                                                                                       | Zhuang Y., Gala A, Yen Y. 2013. Identification of functional genic components of major Fusarium head blight resistance quantitative trait loci in wheat cultivar Sumai 3. Mol Plant Microbe Interact 26(4): 442-50.                                                     |
| 355. Wheat | Fusarium head blight                            | Belgium<br>India   | Inst Agricul & Fisheries Res (ILVO) – Plant, Growth & Development, Belgium<br>Natl Chemical Lab, India<br>Ghent Univ, Fac Biosci Engineer, Dept Plant Production, Belgium                                                                                            | Zwart RS, Muylle H, van Bockstaele E, Roldan-Ruiz I. 2008. Evaluation of genetic diversity of Fusarium head blight resistance in European winter wheat. Theor Appl Genet 117(5): 813-28.                                                                                |
| 356. Wheat | Crown rot                                       | Australia          | Univ Southern Queensland, Fac Sci, Ctr Systems Bio<br>Univ of Adelaide, Waite Campus, School Agric, Food & Wine<br>Leslie Res Ctr, Dept Employment, Economic Develop & Innovation                                                                                    | Bovill WD, Horne M, Herde D et al. 2010. Pyramiding QTL increases seedling resistance to crown rot ( <i>Fusarium pseudograminearum</i> ) of wheat ( <i>Triticum aestivum</i> ). Theor Appl Genet 121(1): 127-36.                                                        |
| 357. Wheat | Crown rot                                       | Australia<br>China | CSIRO Plant Ind, Australia<br>Univ Western Australia, School Plant Biol, Australia<br>Agricul Univ Hebei, Coll Life Sci, China<br>Jiangsu Acad Agricul Sci, Inst Biotechnol, China<br>Sichuan Agricul Univ, Minist Educ, Key Lab Crop Genetic Resour & Improv, China | Ma J, Li HB, Zhang CY et al. 2010. Identification and validation of a major QTL conferring crown rot resistance in hexaploid wheat. Theor Appl Genet 120(6): 1119-28.                                                                                                   |
| 358. Wheat | Crown rot                                       | USA<br>Australia   | Washington State Univ, Dept Crop & Soil Sci, USA<br>South Australian Res & Development Inst (SARDI), Australia<br>Oregon State Univ, Columbia Basin Agricul Res Ctr, USA<br>USDA-ARS: Dept Plant Pathol; Dept Crop & Soil Sci, USA                                   | Poole GJ, Smiley RW, Paulitz TC et al. 2012. Identification of quantitative trait loci (QTL) for resistance to Fusarium crown rot ( <i>Fusarium pseudograminearum</i> ) in multiple assay environments in the Pacific Northwestern US. Theor Appl Genet 125(1): 91-107. |
| 359. Wheat | Fusarium head blight<br>Powdery mildew          | Norway             | Norwegian Univ of Life Sci, Dept. of Plant & Environm Sci                                                                                                                                                                                                            | Lu QX. 2011. Partial resistance to Fusarium head blight and powdery mildew in wheat. PhD thesis. Norwegian University of Life Sciences. 127pp.                                                                                                                          |
| 360. Wheat | Fusarium head blight<br>Powdery mildew<br>Rusts | Israel<br>Canada   | Univ of Haifa, Inst Evol, Israel<br>Univ Guelph, Dept Environ Biol, Canada                                                                                                                                                                                           | Xie WL, Nevo E. 2008. Wild emmer: genetic resources, gene mapping and potential for wheat improvement. Euphytica 164(3): 603-14.                                                                                                                                        |
| 361. Wheat | Powdery mildew                                  | Norway             | Norwegian Univ Life Sci, Dept Plant & Environm Sci, Norway                                                                                                                                                                                                           | Lillemo M, Asalf B, Singh RP et al. 2008. The adult plant rust resistance                                                                                                                                                                                               |

|            |                |                 |                                                                                                                                                                                                                             |                                                                                                                                                                                                                                                                          |
|------------|----------------|-----------------|-----------------------------------------------------------------------------------------------------------------------------------------------------------------------------------------------------------------------------|--------------------------------------------------------------------------------------------------------------------------------------------------------------------------------------------------------------------------------------------------------------------------|
|            |                | Mexico<br>China | CIMMYT, Mexico<br>Campo Experim Valle Mexico INIFAP, Mexico<br>CAAS, Inst Crop Sci/Natl Wheat Improv Ctr, China<br>CIMMYT China Off, China                                                                                  | loci <i>Lr34/Yr18</i> and <i>Lr46/Yr29</i> are important determinants of partial resistance to powdery mildew in bread wheat line saar<br>Theor Appl Genet 116(8): 1155-66.                                                                                              |
| 362. Wheat | Powdery mildew | China           | Northwest A&F Univ, Coll Agron, State Key Lab Crop Stress Biol Arid Areas                                                                                                                                                   | Xue F, Ji WQ, Wang CY et al. 2012. High-density mapping and marker development for the powdery mildew resistance gene <i>PmA5846</i> derived from wild emmer wheat ( <i>Triticum turgidum</i> var. <i>dicoccoides</i> ). Theor Appl Genet 124(8): 1549-60.               |
| 363. Wheat | Powdery mildew | China           | Nanjing Agric Univ, Coll Agric Sci, Crop Genom & Bioinformatics Ctr & Natl Key Lab of Crop Genet & Germplasm Enhancement, Applied Plant Genom Lab                                                                           | Xu HX, Yao GQ, Xiong L et al. 2008. Identification and mapping of <i>pm2026</i> : a recessive powdery mildew resistance gene in an einkorn ( <i>Triticum monococcum</i> L.) accession. Theor Appl Genet 117(4): 471-77.                                                  |
| 364. Wheat | Powdery mildew | China           | Sichuan Agric Univ, State Key Lab Plant Breed & Genet<br>Univ Electronic Sci & Technol of China, School of Life Sci & Technol<br>Shanxi Acad Agric Sci, Inst Crop Genet                                                     | Luo PG, Luo HY, Chang ZJ et al. 2009. Characterization and chromosomal location of <i>Pm40</i> in common wheat: a new gene for resistance to powdery mildew derived from <i>Elytrigia intermedium</i> . Theor Appl Genet 118(6): 1059-64.                                |
| 365. Wheat | Powdery mildew | China           | China Agric Univ, Dept Plant Genet & Breed<br>Minist Agric: State Key Lab Agrobiotechnol; Key Lab Crop Genom & Genetic Improv<br>Minist Educ: Beijing Key Lab Crop Genetic Improv; Key Lab Crop Heterosis Res & Utilization | Li GQ, Fang TL, Zhu J et al. 2009. Molecular identification of a powdery mildew resistance gene from common wheat cultivar Brock. Acta Agron Sin 35(9): 1613-19.                                                                                                         |
| 366. Wheat | Powdery mildew | China           | Shihezi Univ, Coll Agric Sci                                                                                                                                                                                                | Huang QH, Jing RL, Wu XY et al. 2008. QTL mapping for adult-plant resistance to powdery mildew in common wheat. Sci Agric Sin 8: 2528-36.                                                                                                                                |
| 367. Wheat | Powdery mildew | China           | China Agric Univ, Min Agric, State Key Lab Agrobiotechnol, Key Lab Crop Genom & Genetic Improv                                                                                                                              | Hua W, Guo X, Zhu J et al. 2010. Identification and genetic mapping of powdery mildew resistance gene <i>MLW E27</i> in common wheat introgressed from <i>Triticum dicoccoides</i> . Nong ye sheng wu ji shu xue bao = Journal of Agricultural Biotechnology 18(1): 3-9. |
| 368. Wheat | Powdery mildew | China           | China Agric Univ, Dept Plant Genet & Breed, State Key Lab Agrobiotechnol, Key Lab Crop Genom & Genetic Improv, Mnist Agric<br>Beijing Univ Agric, Coll Plant Sci & Technol                                                  | Han J, Zhang LS, Li GQ et al. 2009. Molecular mapping of powdery mildew resistance gene <i>MIWE18</i> in wheat originated from wild emmer ( <i>Triticum turgidum</i> van <i>dicoccoides</i> ). Acta Agron Sin 35(10): 1791-97.                                           |
| 369. Wheat | Powdery mildew | China           | CAAS, State Key Lab Biol Plant Dis & Insect Pests, Inst Plant Protect, China<br>Northwest A&F Univ, Coll Agron, China                                                                                                       | Xue F, Zhai WW, Duan XY et al. 2009. Microsatellite mapping of powdery mildew resistance gene in wheat landrace Xiaobaidong. Acta Agron Sin 35(10): 1806-11.                                                                                                             |
| 370. Wheat | Powdery mildew | China<br>Canada | Lanzhou Univ, Key Lab Arid & Grassl& Ecol of Minist Educ, China<br>Henan Acad Agr Sci, Inst Plant Protect, China<br>Univ Manitob, Dept Plant Sci, Canada                                                                    | Yi YJ, Li HY, Huang XQ et al. 2008. Development of molecular markers linked to the wheat powdery mildew resistance gene <i>Pm4b</i> and marker validation for molecular breeding. Plant breeding 127(2): 116-20.                                                         |
| 371. Wheat | Powdery mildew | China           | Henan Acad Agricul Sci, Inst Plant Protect, China<br>Northwest A&F Univ, Key Lab Plant Protect Resour & Pest Management<br>Minist Educ<br>Shaanxi Key Lab Mol Biol Agric                                                    | Wang JM, Liu HY, Wang F et al. 2007. Identification of a microsatellite marker linked with powdery mildew resistance gene <i>Pm6</i> in wheat. Acta Phytopath Sinica 3: 329-32.                                                                                          |

|            |                                                                                                                |                |                                                                                                                                                                                                                                                                   |                                                                                                                                                                                                                                                  |
|------------|----------------------------------------------------------------------------------------------------------------|----------------|-------------------------------------------------------------------------------------------------------------------------------------------------------------------------------------------------------------------------------------------------------------------|--------------------------------------------------------------------------------------------------------------------------------------------------------------------------------------------------------------------------------------------------|
| 372. Wheat | Powdery mildew                                                                                                 | China          | Henan Univ Sci & Technol , Coll Agric<br>Shandong Agric Univ, Tai'an Subctr of Natl Wheat Improv Ctr, State Key Lab Crop Biol                                                                                                                                     | Wang LM, Zhu YL, Li XF, Wang HG. 2011. Screening for SSR markers linked to wheat powdery mildew resistance gene <i>Pm2</i> . Journal of Plant Protection 3: 216-220.                                                                             |
| 373. Wheat | Powdery mildew                                                                                                 | China          | CAS: Ctr Agricul Resour Res, Inst Genet & Develop Biol (IGDB); State Key Lab Plant Cell & Chromosome Engineer, IGDB<br>CAAS: State Key Lab Biol Plant Dis & Insect Pests, Inst Plant Protection; Inst Crop Sci, Natl Key Facility Crop Gene Resour & Genet Improv | An D, Zheng Q, Zhou Y et al. 2013. Molecular cytogenetic characterization of a new wheat-rye 4R chromosome translocation line resistant to powdery mildew. Chromosome Res 21(4): 419-32.                                                         |
| 374. Wheat | Powdery mildew                                                                                                 | Italy<br>Spain | Consiglio Ricerca & Sperimentazione Agricoltura - Cereal Res Ctr, Italy<br>Univ Bari, Dept Agro-Forestry & Environm Biol & Chem, Italy<br>CSIC, Inst Sustainable Agric, Spain                                                                                     | Marone D, Russo MA, Laido G et al. 2013. Genetic basis of qualitative and quantitative resistance to powdery mildew in wheat: From consensus regions to candidate genes. BMC Genomics 14                                                         |
| 375. Wheat | Powdery mildew                                                                                                 | Germany        | Bavarian State Res Ctr Agric, Inst Crop Sci & Plant Breed<br>Secobra Saatzucht GmbH                                                                                                                                                                               | Mohler V, Bauer C, Schweizer G et al. 2013. <i>Pm50</i> : a new powdery mildew resistance gene in common wheat derived from cultivated emmer. J Appl Genet 54(3): 259-63.                                                                        |
| 376. Wheat | Powdery mildew                                                                                                 | China          | Tianjin Normal Univ, Coll Chem & Life Sci, Tianjin Key Lab Cyto-genetical & Mol Regulation                                                                                                                                                                        | Wang Y, Zhu J, Zhao HM et al. 2008. Screening and identification of the AFLP markers linked to a new powdery mildew resistance gene in wheat cultivar Brock. Fen Zi Xi Bao Sheng Wu Xue Bao (=Journal of Molecular cell Biology) 41(4): 294-300. |
| 377. Wheat | Powdery mildew                                                                                                 | China          | CAAS, Natl Key Facility Crop Gene Resour & Genet Improv (NFCRI), Inst Crop Sci<br>Henan Univ Sci & Technol, Forestry Coll<br>CAS, Ctr Agricul Resour Res, Inst Genet & Developmen Biol                                                                            | Xiao M, Song F, Jiao J et al. 2013. Identification of the gene <i>Pm47</i> on chromosome 7BS conferring resistance to powdery mildew in the Chinese wheat landrace Hongyanglazi. Theor Appl Genet 126(5): 1397-403.                              |
| 378. Wheat | Powdery mildew                                                                                                 | China          | CAAS, Inst Crop Sci, Nat Key Facility Crop Gene Resour & Genetic Improv (NFCRI)<br>Hebei Normal Univ Sci & Technol, Coll Life Sci & Technol<br>Guilin Medical Univ, Coll Biotechnol                                                                               | Zhao Z, Sun H, Song W et al. Genetic analysis and detection of the gene <i>MILX99</i> on chromosome 2BL conferring resistance to powdery mildew in the wheat cultivar Liangxing 99. Theor Appl Genet 126(12): 3081-89.                           |
| 379. Wheat | Powdery mildew<br>Stripe rust                                                                                  | China          | CAAS: Inst Crop Sci, Natl Wheat Improv Ctr; Natl Key Facility Crop Gene Resour & Genetic Improv; Inst Plant Protection<br>CIMMYT China Off                                                                                                                        | Liu D, Xia X, He Z, Xu S. 2008. A novel homeobox-like gene associated with reaction to stripe rust and powdery mildew in common wheat. Phytopathology 98(12): 1291-96.                                                                           |
| 380. Wheat | Powdery mildew<br>Fusarium head blight                                                                         | China          | Sichuan Agric Univ, Dept Plant Protect                                                                                                                                                                                                                            | Song W, Zhang M, Yang JZ et al. 2010. Pyramiding resistance to powdery mildew and Fusarium head blight (FHB) by molecular marker-assisted selection (MAS). Acta Phytopath Sinica 6: 655-658.                                                     |
| 381. Wheat | Powdery mildew<br>Barley yellow dwarf virus<br>Rusts<br>Common bunt<br>Fusarium head blight<br>Foliar diseases | Romania        | NARDI Fundulea                                                                                                                                                                                                                                                    | Ittu M, Saulescu NN, Ittu G. 2007. Main objectives and results in breeding wheat for resistance to diseases at NARDI Fundulea. Analele Institutului Național de Cercetare-Dezvoltare Agricolă Fundulea 74: 23-27.                                |
| 382. Wheat | Septoria leaf blotch                                                                                           | Romania        | Univ Agric Sci & Veterinary Medicine                                                                                                                                                                                                                              | Curticiu DM, Botez C, Laura C, Meda L. 2007. Marker assisted selection for <i>Septoria tritici</i> resistance of common wheat. Buletin USAMV-CN                                                                                                  |

|            |                      |                       |                                                                                                                                                                                                                                                 |                                                                                                                                                                                                                                                                                                    |
|------------|----------------------|-----------------------|-------------------------------------------------------------------------------------------------------------------------------------------------------------------------------------------------------------------------------------------------|----------------------------------------------------------------------------------------------------------------------------------------------------------------------------------------------------------------------------------------------------------------------------------------------------|
|            |                      |                       |                                                                                                                                                                                                                                                 | 63:311.                                                                                                                                                                                                                                                                                            |
| 383. Wheat | Septoria leaf blotch | Romania               | Univ Agric Sci & Veterinary Medicine                                                                                                                                                                                                            | Botez C, Pamfil D, Curticiu D et al. 2009. Marker assisted selection for <i>Septoria tritici</i> resistance in wheat dihaploid lines. Not Bot Hort Agrobot Cluj 37(1): 253-55.                                                                                                                     |
| 384. Wheat | Septoria leaf blotch | Netherlands<br>France | Plant Res Internatl, Biointeractions & Plant Health, Netherlands<br>Graduate School Experim Plant Sci, Netherlands<br>Bioplante, France<br>Florimond Desprez, France<br>Serasem, France<br>Wageningen Univ, Laboratory Plant Breed, Netherlands | Ghaffary SM, Robert O, Laurent V et al. 2011. Genetic analysis of resistance to <i>Septoria tritici</i> blotch in the French winter wheat cultivars Balance and Apache. Theor Appl Genet 123(5): 741-54.                                                                                           |
| 385. Wheat | Take-all             | China                 | Sichuan Agricul Univ: Triticeae Res Inst; Minist Educ, Key Lab Crop Genet Resour & Improv                                                                                                                                                       | Kang HY, Zhang HQ, Fan X, Zhou YH. 2008. Morphological and cytogenetic studies on the hybrid between bread wheat and <i>Psathyrostachys huashanica</i> Keng ex Kuo. Euphytica 162(3): 441-48.                                                                                                      |
| 386. Wheat | Take-all             | Ukraine               | Natl Acad Sci, Inst Plant Physiol & Genet                                                                                                                                                                                                       | Bavol AV, Dubrovna OV. 2009. Molecular-genetic polymorphism of cellular lines of wheat resistant to cultural filtrate <i>Gaeumannomyces graminis</i> var. <i>tritici</i> and plant-regenerants from them. Tsitol Genet 43(5): 28-34.                                                               |
| 387. Wheat | Eyespot              | China<br>France       | CAS: NW Inst Plateau Biol; Grad Univ, China<br>Qinghai Normal Univ, Coll Biol & Geog Sci, China<br>INRA AgroCampus Ouest, UMR Ameliorat Plantes & Biotechnol Vegetales 118, France                                                              | Wei L, Muranty H, Zhang HG. 2011. Advances and prospects in wheat eyespot research: Contributions from genetics and molecular tools. J Phytopathol 159(7-8): 457-70.                                                                                                                               |
| 388. Wheat | Eyespot              | Germany               | Fed Res Ctr Cultivated Plants, JKI, Inst Resistance Res & Stress Tolerance KWS LOCHOW GmbH<br>JustusLiebig Univ Giessen, Dept Plant Breed, Res Ctr Bio Syst Land Resour & Nutr (IFZ)                                                            | Meyer N, Lind V, Heindorf M et al. 2011. Diagnostic value of molecular markers linked to the eyespot resistance gene <i>Pch1</i> in wheat. Euphytica 177(2): 267-75.                                                                                                                               |
| 389. Wheat | Eyespot              | USA                   | Washington State Univ, Dept Plant Pathol<br>USDA-ARS, Wheat Genet Qual Physiol & Dis Res Unit                                                                                                                                                   | Sheng HY, See DR, Murray TD. 2012. Mapping QTL for resistance to eyespot of wheat in <i>Aegilops longissima</i> . Theor Appl Genet 125(2): 355-66.                                                                                                                                                 |
| 390. Wheat | Eyespot              | UK                    | John Innes Ctr                                                                                                                                                                                                                                  | Burt C, Nicholson P. 2011. Exploiting co-linearity among grass species to map the <i>Aegilops ventricosa</i> -derived <i>Pch1</i> eyespot resistance in wheat and establish its relationship to <i>Pch2</i> . Theor Appl Genet 123(8): 1387-1400.                                                  |
| 391. Wheat | Eyespot              | UK                    | John Innes Ctr<br>RAGT Seeds Ltd.                                                                                                                                                                                                               | Burt C, Hollins TW, Nicholson P. 2011. Identification of a QTL conferring seedling and adult plant resistance to eyespot on chromosome 5A of Cappelle Desprez. Theor Appl Genet 122(1): 119-28.                                                                                                    |
| 392. Wheat | Eyespot              | UK                    | John Innes Ctr<br>RAGT Seeds Ltd.                                                                                                                                                                                                               | Burt C, Hollins TW, Powell N, Nicholson P. 2010. Differential seedling resistance to the eyespot pathogens, <i>Oculimacula yallundae</i> and <i>Oculimacula acuformis</i> , conferred by <i>Pch2</i> in wheat and among accessions of <i>Triticum monococcum</i> . Plant Pathology 59 (5): 819-28. |
| 393. Wheat | Eyespot              | UK                    | John Innes Ctr                                                                                                                                                                                                                                  | Chapman NH, Burt C, Nicholson P. 2009. The identification of candidate genes associated with <i>Pch2</i> eyespot resistance in wheat using cDNA-                                                                                                                                                   |

|            |          |                    |                                                                                                                                                                                                                    |                                                                                                                                                                                                                                                                     |
|------------|----------|--------------------|--------------------------------------------------------------------------------------------------------------------------------------------------------------------------------------------------------------------|---------------------------------------------------------------------------------------------------------------------------------------------------------------------------------------------------------------------------------------------------------------------|
|            |          |                    |                                                                                                                                                                                                                    | AFLP. Theor Appl Genet 118(6): 1045-57.                                                                                                                                                                                                                             |
| 394. Wheat | Eyespot  | UK                 | John Innes Ctr                                                                                                                                                                                                     | Chapman NH, Burt C, Dong H, Nicholson P. 2008. The development of PCR-based markers for the selection of eyespot resistance genes <i>Pch1</i> and <i>Pch2</i> . Theor Appl Genet 117(3): 425-33.                                                                    |
| 395. Wheat | Eyespot  | USA                | Oregon State Univ, Dept Crop & Soil Sci<br>Univ Idaho, Dept Plant Soil & Entomol Sci<br>Washington State Univ: Dept Crop & Soil Sci; USDA-ARS                                                                      | Leonard JM, Watson CJW, Carter AH et al. 2008. Identification of a candidate gene for the wheat endopeptidase <i>Ep-D1</i> locus and two other STS markers linked to the eyespot resistance gene <i>Pch1</i> . Theor Appl Genet 116(2): 261-70.                     |
| 396. Wheat | Tan spot | USA                | N Dakota State Univ: Dept Plant Pathol, NDSU Dept 7660 ; Dept Plant Sci, NDSU Dept 7670<br>Univ California, Dept Plant Pathol, Davis, c/o U.S. Agric Res Stn<br>USDA-ARS, Small Grains & Potato Germplasm Res Unit | Gurung S, Mamidi S, Bonman JM et al. 2011. Identification of novel genomic regions associated with resistance to <i>Pyrenophora tritici-repentis</i> races 1 and 5 in spring wheat landraces using association analysis. Theor Appl Genet 123(6): 1029-41.          |
| 397. Wheat | Tan spot | China<br>Australia | CSIRO Plant Ind, Queensland Biosci Precinct, Australia<br>Jiangsu Acad Agricul Sci, Inst Food Crops, China<br>Hebei Agricul Univ, Fac Agric, Baoding, China                                                        | Li HB, Yan W, Liu GR et al. 2011. Identification and validation of quantitative trait loci conferring tan spot resistance in the bread wheat variety Ernie. Theor Appl Genet 122(2): 395-403.                                                                       |
| 398. Wheat | Tan spot | USA                | USDA-ARS, No Crop Sci Lab, NPA, NCSL<br>N Dakota State Univ: Genom & Bioinformat Program; Dept Plant Sci                                                                                                           | Faris JD, Abeysekara NS, McClean PE et al. 2012. Tan spot susceptibility governed by the <i>Tsn1</i> locus and race-nonspecific resistance quantitative trait loci in a population derived from the wheat lines Salamouni and Katepwa. Mol Breeding 30(4): 1669-78. |
| 399. Wheat | Tan spot | Mexico<br>Germany  | CIMMYT, Mexico<br>Tech Univ Munich, Inst Plant Breed, Germany                                                                                                                                                      | Tadesse W, Schmolke M., Hsam SLK et al. 2010. Chromosomal location and molecular mapping of a tan spot resistance gene in the winter wheat cultivar Red Chief. J Appl Genet 51(3): 235-42.                                                                          |
| 400. Wheat | Tan spot | USA                | Kansas State Univ: USDA-ARS, Hard Winter Wheat Genet Res Unit; Dept Agron; Dept Plant Pathol                                                                                                                       | Sun XC, Bockus W, Bai GH. 2010. Quantitative trait loci for resistance to <i>Pyrenophora tritici-repentis</i> race 1 in a Chinese wheat. Phytopathology 100(5): 468-73.                                                                                             |
| 401. Wheat | Tan spot | Mexico<br>USA      | CIMMYT, Mexico<br>N Dakota State Univ: Dept Plant Pathol, NDSU Dept 7660; Dept 7670, Dept Plant Sci, USA                                                                                                           | Singh PK, Mergoum M, Adhikari TB et al. 2010. Genetic and molecular analysis of wheat tan spot resistance effective against <i>Pyrenophora tritici-repentis</i> races 2 and 5. Mol Breeding 25(3): 369-79.                                                          |
| 402. Wheat | Tan spot | USA                | N Dakota State Univ<br>USDA-ARS, Small Grains & Potato Germplasm Res Unit                                                                                                                                          | Gurung S, Bonman JM, Acevedo M, Adhikari TB. 2010. Genome wide association mapping of resistance to tan spot and spot blotch in spring wheat. Phytopathology 100 (6): S45-S45.                                                                                      |
| 403. Wheat | Tan spot | USA                | USDA-ARS, Cereal Crops Res Unit, No Crop Sci Lab<br>N Dakota State Univ, Dept Plant Pathol                                                                                                                         | Chu CG, Chao S, Friesen TL et al. 2010. Identification of novel tan spot resistance QTLs using an SSR-based linkage map of tetraploid wheat. Mol Breeding 25(2): 327-38.                                                                                            |
| 404. Wheat | Tan spot | USA<br>India       | Kansas State Univ: Dept Plant Pathol; USDA-ARS, USA<br>Punjab Agricul Univ, Dept Plant Breed Genet & Biotechnol, India                                                                                             | Singh S, Bockus WW, Sharma I et al. 2008. A novel source of resistance in wheat to <i>Pyrenophora tritici-repentis</i> race 1. Plant Dis 92(1): 91-95.                                                                                                              |
| 405. Wheat | Tan spot | USA<br>Canada      | N Dakota State Univ: Dept Plant Sci; Dept Plant Pathol, USA<br>S Dakota State Univ, Dept Plant Sci, USA<br>Univ Saskatchewan, Dept Plant Sci, Canada                                                               | Singh PK, Mergoum M, Gonzalez-Hernandez JL et al. 2008. Genetics and molecular mapping of resistance to necrosis inducing race 5 of <i>Pyrenophora tritici-repentis</i> in tetraploid wheat. Mol Breeding 21(3): 293-304.                                           |

|            |                                                                                                                |                            |                                                                                                                                                                                                                                                                                                                                                                                           |                                                                                                                                                                                                                                                               |
|------------|----------------------------------------------------------------------------------------------------------------|----------------------------|-------------------------------------------------------------------------------------------------------------------------------------------------------------------------------------------------------------------------------------------------------------------------------------------------------------------------------------------------------------------------------------------|---------------------------------------------------------------------------------------------------------------------------------------------------------------------------------------------------------------------------------------------------------------|
| 406. Wheat | Tan spot                                                                                                       | USA                        | USDA-ARS, No Crop Sci Lab<br>N Dakota State Univ, Dept Plant Sci                                                                                                                                                                                                                                                                                                                          | Chu CG, Friesen TL, Xu SS, Faris JD. 2008. Identification of novel tan spot resistance loci beyond the known host-selective toxin insensitivity genes in wheat. <i>Theor Appl Genet</i> 117(6): 873-81.                                                       |
| 407. Wheat | Tan spot                                                                                                       | Germany                    | Tech Univ Munich, Inst Plant Breed                                                                                                                                                                                                                                                                                                                                                        | Tadesse W, Schmolke M, Hsam SLK et al. 2007. Molecular mapping of resistance genes to tan spot <i>Pyrenophora tritici-repentis</i> race 1 in synthetic wheat lines. <i>Theor Appl Genet</i> 114(5): 855-62.                                                   |
| 408. Wheat | Tan spot                                                                                                       | USA                        | USDA-ARS, Cereal Crops Res Unit, No Crop Sci Lab<br>N Dakota State Univ, Dept Plant Pathol                                                                                                                                                                                                                                                                                                | Faris JD, Liu ZH, Xu SS. 2013. Genetics of tan spot resistance in wheat. <i>Theor Appl Genet</i> 126(9): 2197-17.                                                                                                                                             |
| 409. Wheat | Tan spot<br><i>Stagonospora nodorum</i> blotch                                                                 | USA<br>Canada<br>Australia | USDA-ARS, Cereal Crops Res Unit, Northern Crop Sci Lab, USA<br>N Dakota State Univ: Dept Plant Pathol; Dept Plant Sci, USA<br>Agric & Agri-Food Canada, Cereal Res Ctr, Canada<br>Throckmorton Plant Sci Ctr, USDA-ARS, Kansas State Univ, Plant Sci & Entomol Res Unit, Dept Plant Pathol, USA<br>Murdoch Univ, Australian Ctr Necrotrophic Fungal Pathogens, Australia A6150, Australia | Faris JD, Zhang Z, Lu H et al. 2010. A unique wheat disease resistance-like gene governs effector-triggered susceptibility to necrotrophic pathogens. <i>Proc Natl Acad Sci USA</i> 107(30): 13544-49.                                                        |
| 410. Wheat | Tan spot<br><i>Stagonospora nodorum</i> blotch                                                                 | China<br>USA               | CAS: NW Plateau Inst Biol, Key Lab Adaptat & Evolut Plateau Biota; Inst Bot, State Key Lab Systemat & Evolutionary Bot, China<br>Utah State Univ, USDA-ARS, Forage & Range Res Lab, USA                                                                                                                                                                                                   | Dou QW, Lei YT, Li XM et al. 2012. Characterization of alien chromosomes in backcross derivatives of <i>Triticum aestivum</i> x <i>Elymus rectisetus</i> hybrids by using molecular markers and sequential multicolor fish/gish. <i>Genome</i> 55(5): 337-47. |
| 411. Wheat | Tan spot<br><i>Stagonospora nodorum</i> blotch<br>Septoria leaf blotch<br>Fusarium head blight                 | USA<br>Mexico              | N Dakota State Univ: Dept Plant Sci, NDSU Dep 7670; Dept Plant Pathol, NDSU Dep 7660, USA<br>CIMMYT, Mexico<br>Mayville Univ, USA                                                                                                                                                                                                                                                         | Mergoum M, Singh PK, Froberg RC et al. 2009. Registration of Steele-ND/ND 735 wheat recombinant inbred lines mapping population. <i>J Plant Registr</i> 3(3): 300-03.                                                                                         |
| 412. Wheat | Tan spot<br>Stripe rust<br>Leaf rust<br>Karnal bunt                                                            | Mexico<br>India            | CIMMYT, Mexico<br>Univ Autonoma Chapingo, Mexico<br>Punjab Agricul Univ, Dept Plant Breed Genet & Biotechnol, India                                                                                                                                                                                                                                                                       | Sukhwinder S, Hernandez MV, Crossa J et al. 2012. Multi-trait and multi-environment QTL analyses for resistance to wheat diseases. <i>PLoS One</i> 7(6): e38008.                                                                                              |
| 413. Wheat | Tan spot<br>Septoria leaf blotch<br>Stripe rust<br>Leaf rust<br>Stem rust<br>2 species of root-lesion nematode | Australia<br>India         | Queensland Primary Ind & Fisheries, Leslie Res Ctr, Dept Employment Econ Dev & Innovat, Australia<br>Plant Mol Biol Unit, Biochemical Sci Division, Nat Chemical Lab, India<br>Univ Sydney, Plant Breed Inst, Australia<br>Wagga Wagga Agricul Inst, Primary Industries, Ind & Investment NSW, Australia                                                                                  | Zwart RS, Thompson JP, Milgate AW et al. 2010. QTL mapping of multiple foliar disease and root-lesion nematode resistances in wheat. <i>Mol Breeding</i> 26(1): 107-24.                                                                                       |
| 414. Wheat | Hessian fly                                                                                                    | USA                        | N Dakota State Univ: Dept Entomol; Dept Plant Sci<br>USDA-ARS, No Crop Sci Lab                                                                                                                                                                                                                                                                                                            | Yu GT, Wang T, Anderson KM et al. 2012. Evaluation and haplotype analysis of elite synthetic hexaploid wheat lines for resistance to hessian fly. <i>Crop Sci</i> 52(2): 752-63.                                                                              |
| 415. Wheat | Hessian fly                                                                                                    | Spain                      | Ctr UdL IRTA                                                                                                                                                                                                                                                                                                                                                                              | Sin E, Del Moral J, Hernandez P et al. 2011. Effects of the 4N(v) chromosome from <i>Aegilops ventricosa</i> on agronomic and quality traits in bread wheat. <i>Czech J Genet Plant Breed</i> 47: S63-S66.                                                    |

|            |                                                                                             |                          |                                                                                                                                                                              |                                                                                                                                                                                                                                            |
|------------|---------------------------------------------------------------------------------------------|--------------------------|------------------------------------------------------------------------------------------------------------------------------------------------------------------------------|--------------------------------------------------------------------------------------------------------------------------------------------------------------------------------------------------------------------------------------------|
| 416. Wheat | Hessian fly                                                                                 | USA                      | Purdue Univ: Dept Agron<br>USDA-ARS, Crop Prod & Pest Control                                                                                                                | Kong L, Ohm HW, Cambron SE, Williams CE. 2005. Molecular mapping determines that Hessian fly resistance gene <i>H9</i> is located on chromosome 1A of wheat. <i>Plant Breeding</i> 124(6): 525-31.                                         |
| 417. Wheat | Hessian fly                                                                                 | Republic of Korea<br>USA | Korea Univ, Coll Life Sci & Biotechnol, Republic of Korea<br>Univ Georgia, Dept Crop & Soil Sci, USA                                                                         | Lee TG, Hong MJ, Johnson JW et al. 2009. Development and functional assessment of EST-derived 2RL-specific markers for 2BS.2RL translocations. <i>Theor Appl Genet</i> 119(4): 663-73.                                                     |
| 418. Wheat | Hessian fly                                                                                 | USA                      | North Dakota State Univ: Dept Entomol, Dept Plant Sci,<br>USDA-ARS, Western Regional Res Ctr<br>Univ California, Dept Plant Sci<br>USDA-ARS, Northern Crop Sci Lab, Univ Stn | Yu GT, Cai X, Harris MO et al. 2009. Saturation and comparative mapping of the genomic region harboring Hessian fly resistance gene <i>H26</i> in wheat. <i>Theor Appl Genet</i> 118 (8): 1589-99.                                         |
| 419. Wheat | Hessian fly                                                                                 | USA                      | USDA-ARS: Northern Crop Sci Lab; Crop Production & Pest Control Res Unit<br>North Dakota State Univ: Dept Plant Sci; Dept Entomol                                            | Xu SS, Chu CG, Harris MO, Williams CE. 2011. Comparative analysis of genetic background in eight near-isogenic wheat lines with different <i>H</i> genes conferring resistance to Hessian fly. <i>Genome</i> 54(1): 81-89.                 |
| 420. Wheat | Hessian fly                                                                                 | USA                      | Univ Georgia: Dept Crop & Soil Sci; Dept Entomol<br>Purdue Univ, USDA-ARS, Crop Production & Pest Control Res Unit, Dept Entomol                                             | Hao YF, Cambron SE, Chen ZB et al. 2013. Characterization of new loci for Hessian fly resistance in common wheat. <i>Theor Appl Genet</i> 126(4): 1067-76.                                                                                 |
| 421. Wheat | Hessian fly                                                                                 | China<br>USA             | Northwest A&F Univ, Coll Agron, China<br>Kansas State Univ, Agron Dept, USA<br>USDA-ARS: Hard Winter Wheat Genet Res Unit; Cereal Crops Res Unit, USA                        | Li CL, Chen MS, Chao SM et al. 2013. Identification of a novel gene, <i>H34</i> , in wheat using recombinant inbred lines and single nucleotide polymorphism markers. <i>Theor Appl Genet</i> 126 (8): 2065-71.                            |
| 422. Wheat | Hessian fly                                                                                 | USA                      | Oklahoma State Univ, Dept Plant & Soil Sci<br>Kansas State Univ, Dept Entomol<br>USDA-ARS, Genom & Gene Discovery Res Unit                                                   | Tan CT, Carver BF, Chen MS et al. 2013. Genetic association of <i>OPR</i> genes with resistance to Hessian fly in hexaploid wheat. <i>BMC Genomics</i> 14: 369.                                                                            |
| 423. Wheat | Hessian fly<br>Russian wheat aphid<br>Sunn pest<br>Wheat stem saw fly<br>Cereal leaf beetle | Syria<br>Australia       | Univ Aleppo, Syria<br>Int Ctr Agricul Res Dry Areas ICARDA, Syria<br>Grains Res & Dev Corp, Australia                                                                        | Joukhadar R, El-Bouhssini M, Jighly A, Ogbonnaya FC. 2013. Genome-wide association mapping for five major pest resistances in wheat. <i>Mol Breeding</i> 32(4): 943-60.                                                                    |
| 424. Wheat | Orange wheat blossom midge                                                                  | USA                      | Montana State Univ: Dept Plant Sci & Plant Pathol; Dept Land Resour & Environm Sci<br>NW Agricul Res Ctr                                                                     | Blake NK, Stougaard RN, Weaver DK et al. 2011. Identification of a quantitative trait locus for resistance to <i>Sitodiplosis mosellana</i> (Gehin), the orange wheat blossom midge, in spring wheat. <i>Plant Breeding</i> 130(1): 25-30. |
| 425. Wheat | Orange wheat blossom midge                                                                  | Canada                   | Agric & Agri-Food Canada: Semiarid Prairie Agricul Res Ctr; Cereal Res Ctr; Lethbridge Res Ctr<br>Univ Saskatchewan, Ctr Crop Dev                                            | DePauw RM, Knox RE, Humphreys DG et al. 2011. New breeding tools impact Canadian commercial farmer fields. <i>Czech J Genet Plant Breed</i> 47: S28-S34 (Review)                                                                           |
| 426. Wheat | Hessian fly<br>Orange wheat blossom midge                                                   | Canada                   | Agric & Agri-Food Canada, Semiarid Prairie Agricul Res Ctr                                                                                                                   | Clarke JM. 2007. Genetic enhancement of food safety attributes of durum wheat. <i>Cereal Food World</i> 52(4): 179-81 (Review)                                                                                                             |



|             |                                  |                                  |                                                                                                                                                                                          |                                                                                                                                                                                                                                                                         |
|-------------|----------------------------------|----------------------------------|------------------------------------------------------------------------------------------------------------------------------------------------------------------------------------------|-------------------------------------------------------------------------------------------------------------------------------------------------------------------------------------------------------------------------------------------------------------------------|
| 427. Wheat  | Barley yellow dwarf virus (BYDV) | Australia<br>France              | CSIRO Plant Ind, Australia<br>Établissement national d'Enseignement supérieur agronomique Dijon (ENESAD), France                                                                         | Ayala-Navarrete L, Tourton E, Mechanicos AA, Larkin PJ. 2009. Comparison of <i>Thinopyrum intermedium</i> derivatives carrying barley yellow dwarf virus resistance in wheat. <i>Genome</i> 52(6): 537-46.                                                              |
| 428. Wheat  | BYDV                             | China                            | CAAS, Natil Key Sci Facility Crop Gene Resour & Genetic Improv, Inst Crop Sci                                                                                                            | Gao L, Ma Q, Liu Y et al. 2009. Molecular characterization of the genomic region harboring the BYDV-resistance gene <i>Bdv2</i> in wheat. <i>J Appl Genet</i> 50(2): 89-98.                                                                                             |
| 429. Wheat  | BYDV                             | China                            | CAAS, Natil Key Sci Facility Crop Gene Resour & Genetic Improv, Inst Crop Sci                                                                                                            | Zhang Z, Lin Z, Xin Z. 2009. Research progress in BYDV resistance genes derived from wheat and its wild relatives. <i>J Genet Genomics</i> 36(9): 567-73 (Review)                                                                                                       |
| 430. Wheat  | BYDV                             | Japan<br>China                   | Tottori Univ, Fac Agric, Mol Genet Lab, Japan<br>CAAS, Inst Crop Breed & Cultivation, China                                                                                              | Ma YZ, Tomita M. 2013. <i>Thinopyrum</i> 7Ai-1-derived small chromatin with Barley yellow dwarf virus (BYDV) resistance gene integrated into the wheat genome with retrotransposon. <i>Cytology and Genetics</i> 47(1): 1-7.                                            |
| 431. Wheat  | Wheat dwarf virus BYDV           | Czech Republic                   | Selgen a.s.<br>SELTON Ltd.<br>Crop Res Ins.                                                                                                                                              | Veskna O, Sedlacek T, Horcicka P et al. 2008. Reaction of selected BYDV-tolerant wheat genotypes to Czech PAV isolate. In: Molina-Cano J.L. et al. (eds.): <i>Cereal science and technology for feeding ten billion people: genomics era and beyond</i> . 173-74.       |
| 432. Barley | Barley leaf rust                 | USA                              | Virginia Polytech Inst & State Univ, Dept Crop & Soil Environm Sci                                                                                                                       | Mammadov JA, Brooks WS, Griffey CA, Saghai Maroof MA. 2007. Validating molecular markers for barley leaf rust resistance genes <i>Rph5</i> and <i>Rph7</i> . <i>Plant Breeding</i> 126(5): 458-63.                                                                      |
| 433. Barley | Barley leaf rust                 | UK<br>Netherlands                | Scottish Crop Res Inst: Genet Programme; Biomathematics & Statistics Scotland (BioSS), UK<br>Wageningen Univ, Graduate School Experim Plant Sci, Lab Plant Breed, Netherlands            | Chen X, Hackett CA, Niks RE et al. 2010. An eQTL analysis of partial resistance to <i>Puccinia hordei</i> in barley. <i>Plos One</i> 5(1): e8598.                                                                                                                       |
| 434. Barley | Barley leaf rust                 | New Zealand<br>Netherlands       | The New Zealand Inst Plant & Food Res Limited, New Zealand<br>Wageningen Univ, Lab Plant Breed, Netherlands<br>Formerly Plant & Food Res, New Zealand                                    | Johnston PA, Niks RE, Meiyalaghan V et al. 2013. <i>Rph22</i> : Mapping of a novel leaf rust resistance gene introgressed from the non-host <i>Hordeum bulbosum</i> L. into cultivated barley ( <i>Hordeum vulgare</i> L.). <i>Theor Appl Genetics</i> 126(6): 1613-25. |
| 435. Barley | Barley leaf rust                 | Netherlands<br>France<br>Germany | Wageningen Univ, Graduate School Experim Plant Sci, Lab Plant Breed, Netherlands<br>I.U.P.-P.V.I.A., Faculté des Sci, France<br>Leibniz-Inst Plant Genet & Crop Plant Res (IPK), Germany | Marcel TC, Aghnoum R, Durand J et al. 2007. Dissection of the barley 2L1.0 region carrying the ' <i>Laevigatum</i> ' quantitative resistance gene to leaf rust using near-isogenic lines (NIL) and subNIL. <i>Mol Plant Microbe Interact</i> 20(12): 1604-15.           |
| 436. Barley | Barley leaf rust                 | Netherlands<br>Germany<br>France | Wageningen Univ, Lab Plant Breed, Graduate school Experim Plant Sci, Netherlands<br>IPK, Germany<br>Univ degli studi Modena & Reggio Emilia, Fac Agraria, Italy                          | Marcel TC, Varshney RK, Barbieri M et al. 2007. A high-density consensus map of barley to compare the distribution of QTLs for partial resistance to <i>Puccinia hordei</i> and of defence gene homologues. <i>Theor Appl Genet</i> 114(3): 487-500.                    |
| 437. Barley | Barley leaf rust                 | Netherlands<br>Czech Republic    | Wageningen Univ, Lab Plant Breed, Graduate School Experim Plant Sci, Netherlands<br>Czech Univ Agric, Dept Genet & Breed, Fac Agrobiol, Food & Nature Resour, Czech Republic             | Marcel TC, Gorguet B, Ta MT et al. 2008. Isolate specificity of quantitative trait loci for partial resistance of barley to <i>Puccinia hordei</i> confirmed in mapping populations and near-isogenic lines. <i>New Phytol</i> 177(3): 743-55.                          |
| 438. Barley | Barley leaf rust                 | Australia<br>India               | Univ Sydney, Plant Breed Inst Cobbitty, Australia                                                                                                                                        | Golegaonkar PG, Karaoglu H, Park RF. 2009. Molecular mapping of leaf rust resistance gene <i>Rph14</i> in <i>Hordeum vulgare</i> . <i>Theor Appl Genet</i>                                                                                                              |

|             |                                                                 |                                |                                                                                                                                                                                                                                                                                                                                                    |                                                                                                                                                                                                                        |
|-------------|-----------------------------------------------------------------|--------------------------------|----------------------------------------------------------------------------------------------------------------------------------------------------------------------------------------------------------------------------------------------------------------------------------------------------------------------------------------------------|------------------------------------------------------------------------------------------------------------------------------------------------------------------------------------------------------------------------|
|             |                                                                 |                                | Monsanto India Ltd, India                                                                                                                                                                                                                                                                                                                          | 119(7): 1281-88.                                                                                                                                                                                                       |
| 439. Barley | Barley leaf rust                                                | UK<br>Netherlands              | Genet Programme, Scottish Crop Res Inst, UK<br>Wageningen Univ, Graduate School Experim Plant Sci, Lab Plant Breed, Netherlands<br>INRA-AgroParisTech, UMR 1290 BIOGER-CPP, France                                                                                                                                                                 | Chen X, Niks RE, Hedley PE et al. 2010. Differential gene expression in nearly isogenic lines with QTL for partial resistance to <i>Puccinia hordei</i> in barley. BMC Genomics 11: 629.                               |
| 440. Barley | Barley leaf rust                                                | Netherlands<br>China<br>France | CAAS: Inst Botany, Lab Photosynthesis & Environm Mol Physiol; Graduate Univ CAAS, China<br>Wageningen Univ & Res Ctr, Lab Plant Breed, Netherlands<br>NRA-AgroParisTech, UMR1290 BIOGER-CPP, France                                                                                                                                                | Wang L, Wang Y, Wang Z et al. 2010. The phenotypic expression of QTLs for partial resistance to barley leaf rust during plant development. Theor Appl Genet 121(5): 857-64.                                            |
| 441. Barley | Barley leaf rust                                                | Australia<br>Uruguay           | Univ Queensland, School Agric & Food Sci, Australia<br>Hermitage Res Stn, Dept Employment, Economic Development & Innovation, Australia<br>Inst Nacional de Investigación Agropecuaria, Uruguay<br>Leslie Res Centre Toowoomba, Dept Employment, Economic Development & Innovation, Australia<br>Univ Sydney, Plant Breed Inst-Cobbitty, Australia | Hickey LT, Lawson W, Platz GJ et al. 2011. Mapping <i>Rph20</i> : A gene conferring adult plant resistance to <i>Puccinia hordei</i> in barley. Theor Appl Genet 123(1): 55-68.                                        |
| 442. Barley | Barley leaf rust                                                | Australia                      | Univ Queensland, School Agric & Food Sci<br>Hermitage Res Facility, Dept Employment, Economic Development & Innovation                                                                                                                                                                                                                             | Hickey LT, Lawson W, Platz GJ et al. 2012. Origin of leaf rust adult plant resistance gene <i>Rph20</i> in barley. Genome 55(5): 396-99.                                                                               |
| 443. Barley | Barley leaf rust                                                | Netherlands                    | Wageningen Univ & Res Ctr (WUR), Lab Plant Breed                                                                                                                                                                                                                                                                                                   | Gonzalez AM, Marcel TC, Niks RE. 2012. Evidence for a minor gene-for-minor gene interaction explaining nonhypersensitive polygenic partial disease resistance. Phytopathology 102(11): 1086-93.                        |
| 444. Barley | Barley leaf rust                                                | Australia                      | Univ Sydney, Plant Breed Inst<br>Leslie Res Ctr, Agri-Sci Queensland, Dept Agric, Fisheries & Forestry, Crop & Food Sci<br>La Trobe Res & Development Park, Victorian AgriBiosci Ctr, Dept Primary Industries                                                                                                                                      | Sandhu KS, Forrest KL, Kong S et al. 2012. Inheritance and molecular mapping of a gene conferring seedling resistance against <i>Puccinia hordei</i> in the barley cultivar Ricardo. Theor Appl Genet 125(7): 1403-11. |
| 445. Barley | Barley leaf rust                                                | Australia                      | Univ Sydney, Plant Breed Inst                                                                                                                                                                                                                                                                                                                      | Derevnina L, Singh D, Park RF. 2013. Identification and characterization of seedling and adult plant resistance to <i>Puccinia hordei</i> in chinese barley germplasm. Plant Breed 132(6): 571-79.                     |
| 446. Barley | Barley leaf rust                                                | China                          | Northwest A&F Univ , Coll of Agron                                                                                                                                                                                                                                                                                                                 | Liu FL, Wang H. 2010. Application of specific EST markers in the analysis of adult-plant leaf rust resistance gene on 5HS chromosome of barley. J Tritic Crops 30(5): 807-12.                                          |
| 447. Barley | Barley leaf rust<br>Powdery mildew                              | Czech Republic                 | Res Ctr SELTON s.r.o.                                                                                                                                                                                                                                                                                                                              | Sedlacek T, Stemberkova L. 2010. Development of a molecular marker for simultaneous selection of <i>Rph7</i> gene and effective <i>Mla</i> alleles in barley. Cereal Res Commun 38(2): 175-83.                         |
| 448. Barley | Barley leaf rust<br>Powdery mildew<br>Net blotch<br>Spot blotch | USA                            | Crop & Soil Environm Sci, Virginia Tech<br>Texas A&M Univ, Texas AgriLife Res<br>Limagrain Cereal Seeds                                                                                                                                                                                                                                            | Berger GL, Liu S, Hall MD et al. 2013. Marker-trait associations in virginia tech winter barley identified using genome-wide mapping. Theor Appl Genet 126(3): 693-710.                                                |

|             |           |                                                               |                                                                                                                                                                                                                                                                                                                                                                                                                                                                                                                                                                                              |                                                                                                                                                                                                                                                         |
|-------------|-----------|---------------------------------------------------------------|----------------------------------------------------------------------------------------------------------------------------------------------------------------------------------------------------------------------------------------------------------------------------------------------------------------------------------------------------------------------------------------------------------------------------------------------------------------------------------------------------------------------------------------------------------------------------------------------|---------------------------------------------------------------------------------------------------------------------------------------------------------------------------------------------------------------------------------------------------------|
|             |           |                                                               | USDA-ARS Biosci Res Lab<br>Univ Minnesota, Dept Agron & Plant Genet<br>Washington State Univ, Dept Soil & Crop Sci                                                                                                                                                                                                                                                                                                                                                                                                                                                                           |                                                                                                                                                                                                                                                         |
| 449. Barley | Stem rust | UK<br>USA                                                     | Scottish Crop Res Inst, Genet Programme, UK<br>Univ Birmingham, Sch Biosci, UK<br>Univ Abertay, Sch Comp & Creat Technol, UK<br>State Univ, Dept Crop & Soil Sci, UK<br>Univ Minnesota, Dept Plant Pathol, USA<br>Univ Calif Riverside, Dept Bot & Plant Sci, USA<br>USDA-ARS, Corn Insects & Crop Genet Res, USA<br>Iowa State Univ, Dept Plant Pathol, USA<br>Univ Tennessee, Dept Anat & Neurobiol, USA                                                                                                                                                                                   | Druka A, Potokina E, Luo Z et al. 2008. Exploiting regulatory variation to identify genes underlying quantitative resistance to the wheat stem rust pathogen <i>Puccinia graminis</i> f. sp. <i>tritici</i> in barley. Theor Appl Genet 117(2): 261-72. |
| 450. Barley | Stem rust | USA                                                           | Iowa State Univ: Bioinformatics & Computational Biol Graduate Program; Dept Plant Pathol & Microbiol; Ctr for Responses to Env Stresses; USDA-ARS, Corn Insects & Crop Genet Res<br>Univ Minnesota, Dept Plant Pathol                                                                                                                                                                                                                                                                                                                                                                        | Moscou MJ, Lauter N, Steffenson B, Wise RP. 2011. Quantitative and qualitative stem rust resistance factors in barley are associated with transcriptional suppression of defense regulons. PLoS Genet 7(7): e1002208.                                   |
| 451. Barley | Stem rust | Canada<br>New Zealand                                         | Agric & Agri-Food Canada, Cereal Res Ctr, Canada<br>New Zealand Inst Crop & Food Res Limited, New Zealand                                                                                                                                                                                                                                                                                                                                                                                                                                                                                    | Fetch T, Johnston PA, Pickering R. 2009. Chromosomal location and inheritance of stem rust resistance transferred from <i>Hordeum bulbosum</i> into cultivated barley ( <i>H. vulgare</i> ). Phytopathology 99 (4): 339-43.                             |
| 452. Barley | Stem rust | USA<br>UK<br>Latvia<br>Iran<br>Canada<br>Ireland<br>Australia | Washington State Univ, Dept Crop & Soil Sci, USA<br>Scottish Crop Res Inst, UK<br>Univ Idaho, Life Sci Building, Dept Biologic Sci, USA<br>Washington State Univ, School Mol Biosci, USA<br>Univ Latvia, Fac Biol, Latvia<br>Isfahan Univ Technol, Coll Agric, Iran<br>CFIA, Charlottetown Lab 93, Canada<br>Univ Arizona, Arizona Genom Inst, Dept Plant Sci, USA<br>Natl Univ Ireland, Off Res & Graduate Studies, Ireland<br>Diversity Arrays Technol Pty. Ltd., Australia<br>Pioneer Hi-Bred International, Inc., USA<br>Monsanto Company, USA<br>Univ Minnesota, Dept Plant Pathol, USA | Brueggeman R, Druka A, Nirmala J et al. 2008. The stem rust resistance gene <i>Rpg5</i> encodes a protein with nucleotide-binding-site, leucine-rich, and protein kinase domains. Proc Natl Acad Sci USA 105(39): 14970-975.                            |
| 453. Barley | Stem rust | USA                                                           | Washington State Univ, Dept Crop & Soil Sci<br>Univ Minnesota, Dept Plant Pathol                                                                                                                                                                                                                                                                                                                                                                                                                                                                                                             | Brueggeman R, Steffenson, BJ, Kleinhofs A. 2009. The <i>rpg4/Rpg5</i> stem rust resistance locus in barley: Resistance genes and cytoskeleton dynamics. Cell Cycle 8(7): 977-81. (Review)                                                               |
| 454. Barley | Stem rust | USA                                                           | Univ Minnesota, Dept Plant Pathol<br>USDA-ARS, Cereal Dis Lab<br>Washington State Univ, Dept Crop & Soil Sci<br>Monsanto Company                                                                                                                                                                                                                                                                                                                                                                                                                                                             | Steffenson BJ, Jin Y, Brueggeman RS et al. 2009. Resistance to stem rust race TTKSK maps to the <i>rpg4/Rpg5</i> complex of chromosome 5H of barley. Phytopathology 99(10): 1135-41.                                                                    |

|             |                      |                           |                                                                                                                                                                                              |                                                                                                                                                                                                                                         |
|-------------|----------------------|---------------------------|----------------------------------------------------------------------------------------------------------------------------------------------------------------------------------------------|-----------------------------------------------------------------------------------------------------------------------------------------------------------------------------------------------------------------------------------------|
| 455. Barley | Stem rust            | USA                       | North Dakota State Univ, Dept Plant Pathol                                                                                                                                                   | Arora D, Gross T, Brueggeman R. 2013. Allele characterization of genes required for <i>rpg4</i> -mediated wheat stem rust resistance identifies <i>Rpg5</i> as the <i>R</i> gene. <i>Phytopathology</i> 103(11): 1153-61.               |
| 456. Barley | Rusts                | Netherlands               | Wageningen Univ & Res Ctr (WUR), Lab Plant Breed                                                                                                                                             | Jafary H, Albertazzi G, Marcel TC, Niks RE. 2008. High diversity of genes for nonhost resistance of barley to heterologous rust fungi. <i>Genetics</i> 178(4): 2327-39.                                                                 |
| 457. Barley | Smuts                | Australia                 | Univ Southern Queensland, Ctr Systems Biol<br>Leslie Res Ctr, Dept Primary Industries & Fisheries                                                                                            | Lehmensiek A, Sutherland MW, McNamara RB. 2008. The use of high resolution melting (HRM) to map single nucleotide polymorphism markers linked to a covered smut resistance gene in barley. <i>Theor Appl Genet</i> 117(5): 721-28.      |
| 458. Barley | Fusarium head blight | USA<br>Japan              | Univ Minnesota, Dept Agron & Plant Genet, USA<br>Graduate Univ Advanced Studies, Japan                                                                                                       | Fang Z, Eule-Nashoba A, Powers C et al. 2013. Comparative analyses identify the contributions of exotic donors to disease resistance in a barley experimental population. <i>G3: Genes Genomes Genetics</i> 3(11): 1945-53.             |
| 459. Barley | Fusarium head blight | Germany                   | Technische Univ München: Phytopathol; Analytical Food Chem;<br>BIOANALYTIK WeiheStephan, ZIEL Res Ctre Nutrition & Food Sci<br>Saatzucht Josef Breun GmbH & Co. KG                           | Linkmeyer A, Goetz M, Hu L et al. 2013. Assessment and introduction of quantitative resistance to Fusarium head blight in elite spring barley. <i>Phytopathology</i> 103(12): 1252-59.                                                  |
| 460. Barley | Fusarium head blight | USA                       | Univ Minnesota: Dept Agron & Plant Genet; Dept Plant Pathol                                                                                                                                  | Huang Y, Millett BP, Beaubien KA et al. 2013. Haplotype diversity and population structure in cultivated and wild barley evaluated for Fusarium head blight responses. <i>Theor Appl Genet</i> 126(3): 619-36.                          |
| 461. Barley | Fusarium head blight | USA                       | Univ Minnesota: Dept Agron & Plant Genet; Dept of Medicine;<br>Supercomputing Inst Advanced Computational Res<br>Monsanto Company<br>BASF Plant Sci, Res Triangle Park                       | Jia H, Millett BP, Cho S et al. 2011. Quantitative trait loci conferring resistance to Fusarium head blight in barley respond differentially to <i>Fusarium graminearum</i> infection. <i>Funct Integr Genomics</i> 11(1): 95-102.      |
| 462. Barley | Fusarium head blight | USA<br>Australia<br>China | North Dakota State Univ, NDS Dept 7670, Dept Plant Sci, USA<br>Queensland Primary Industries & Fisheries:, Hermitage Res Stn; Leslie Res Ctr, Australia<br>Zhejiang Univ, Dept Plant Protect | Yu GT, Franckowiak JD, Neate SM et al. 2010. A native QTL for Fusarium head blight resistance in North American barley ( <i>Hordeum vulgare</i> L.) independent of height, maturity, and spike type loci. <i>Genome</i> 53(2): 111-118. |
| 463. Barley | Fusarium head blight | USA                       | Univ Minnesota, Dept Agron & Plant Genet                                                                                                                                                     | Nduulu LM, Mesfin A, Muehlbauer GJ, Smith KP. 2007. Analysis of the chromosome 2(2H) region of barley associated with the correlated traits Fusarium head blight resistance and heading date. <i>Theor Appl Genet</i> 115(4): 561-70.   |
| 464. Barley | Fusarium crown rot   | Australia                 | CSIRO Plant Ind, Queensland Biosci Precinct<br>Univ Tasmania, Tasmanian Inst Agricul Res & School Agricul Sci<br>Univ Western Australia, Fac Natural & Agricul Sci, School Plant Biol        | Li HB, Zhou MX, Liu CJ. 2009. A major QTL conferring crown rot resistance in barley and its association with plant height. <i>Theor Appl Genet</i> 118(5): 903-10.                                                                      |
| 465. Barley | Fusarium crown rot   | Australia<br>China        | CSIRO Plant Ind, Australia<br>Sichuan Agricul Univ, Triticeae Res Inst, China<br>Univ Tasmania, Tasmanian Inst Agricul Res & School Agricul Sci, Australia                                   | Chen GD, Liu YX et al. 2013. Major QTL for Fusarium crown rot resistance in a barley landrace. <i>Theor Appl Genet</i> 126(10): 2511-20.                                                                                                |
| 466. Barley | Powdery mildew       | Czech Republic            | Masaryk Univ, Fac Sci, Dept Expt Biol<br>Agric Res Inst Kroměříž Ltd., Dept Integr Plant Prot                                                                                                | Repkova J, Dreiseitl A, Lizal P. 2009. New CAPS marker for selection of a barley powdery mildew resistance gene in the <i>Mla</i> locus. <i>Cereal Res</i>                                                                              |

|             |                                 |                  |                                                                                                                                                                                                                                                                      |                                                                                                                                                                                                                                                  |
|-------------|---------------------------------|------------------|----------------------------------------------------------------------------------------------------------------------------------------------------------------------------------------------------------------------------------------------------------------------|--------------------------------------------------------------------------------------------------------------------------------------------------------------------------------------------------------------------------------------------------|
|             |                                 |                  |                                                                                                                                                                                                                                                                      | Commun 37(1): 93-99.                                                                                                                                                                                                                             |
| 467. Barley | Powdery mildew                  | Germany          | Leibniz Inst Pflanzengenet & Kulturpflanzenforsch                                                                                                                                                                                                                    | Schweizer P, Stein N. 2011. Large-scale data integration reveals colocalization of gene functional groups with meta-QTL for multiple disease resistance in barley. Mol Plant Microbe In 24(12): 1492-1501.                                       |
| 468. Barley | Powdery mildew                  | Germany          | Max-Planck-Inst Plant Breed Res, Barley Genet Res Group<br>Univ Halle-Wittenberg, Inst Agricul & Nutritional Sci, Chair Plant Breed                                                                                                                                  | Schmalenbach I, Korber, N, Pillen K. 2008. Selecting a set of wild barley introgression lines and verification of QTL effects for resistance to powdery mildew and leaf rust. Theor Appl Genet 117(7): 1093-1106.                                |
| 469. Barley | Powdery mildew                  | Australia        | Univ So Queensland, Ctr Syst BiolDis<br>Agri Sci Queensland, Dept Employment Econ Dev & Innovat, Hermitage Res Stn                                                                                                                                                   | Bovill J, Lehmensiek A, Sutherland MW et al. 2010. Mapping spot blotch resistance genes in four barley populations. Mol Breeding 26(4): 653-66.                                                                                                  |
| 470. Barley | Powdery mildew                  | Spain<br>Germany | Univ Coruña, Dept Animal & Plant Physiol & Ecol, Spain<br>JKI: Inst Resistance Res & Stress Tolerance; Inst Plant Protect Field Crops & Grassland, Germany<br>CSIC, Aula Dei Experim Stn, Dept Genet & Plant Production, Spain                                       | Silvar C, Kopahnke D, Flath K et al. 2013. Resistance to powdery mildew in one Spanish barley landrace hardly resembles other previously identified wild barley resistances. Euro J Plant Pathol 136(3): 459-68.                                 |
| 471. Barley | Powdery mildew                  | Spain<br>Germany | Univ Coruña, Dept Eco, Plant & Animal Biol, Spain<br>JKI: Inst Resistance Res & Stress Tolerance, Germany<br>MIPS/IBIS, Helmholtz Zentrum München, Germany<br>RWTH Aachen Univ, Inst Biol I, Germany,<br>Dept Genet & Plant Production, Aula Dei Experime Stn, Spain | Silvar C, Perovic D, Nussbaumer T et al. 2013. Towards positional isolation of three quantitative trait loci conferring resistance to powdery mildew in two Spanish barley landraces. Plos One 8(6): e67336.                                     |
| 472. Barley | Spot blotch                     | USA              | Univ Minnesota: Dept Plant Pathol, Dept Agron & Plant Genet<br>USDA-ARS, Biosci Res Lab<br>Univ California, Dept Botany Plant Sci                                                                                                                                    | Roy JK, Smith KP, Muehlbauer GJ et al. 2010. Association mapping of spot blotch resistance in wild barley. Mol Breeding 26(2): 243-256.                                                                                                          |
| 473. Barley | Spot blotch                     | USA              | Univ Minnesota, Dept Plant Pathol                                                                                                                                                                                                                                    | Zhou H, Steffenson B. 2013. Genome-wide association mapping reveals genetic architecture of durable spot blotch resistance in U.S. barley breeding germplasm. Mol Breeding 32(1): 139-154.                                                       |
| 474. Barley | Spot blotch                     | India            | Banaras Hindu Univ, Inst Agricul Sci: Dept Genet & Plant Breed; Dept Mycol & Plant Pathol                                                                                                                                                                            | Kuldeep T, Nandan R, Kumar U et al. 2008. Inheritance and identification of molecular markers associated with spot blotch ( <i>Cochliobolus sativus</i> L.) resistance through microsatellites analysis in barley. Genet Mol Biol 31(3): 734-42. |
| 475. Barley | Spot blotch<br>Barley leaf rust | Uruguay<br>USA   | Univ Republ, Fac Agron: Dept Producc Vegetal; Dept Protec Vegetal, Uruguay<br>INIA La Estanzuela, Uruguay<br>Oregon State Univ, Dept Crop & Soil Sci, USA                                                                                                            | Castro AJ, Gamba F, German S et al. 2012. Quantitative trait locus analysis of spot blotch and leaf rust resistance in the BCD47 Baronesse barley mapping population. Plant Breeding 131(2): 258-266.                                            |
| 476. Barley | Spot blotch<br>Net blotch       | Canada           | Univ Saskatchewan, Ctr Crop Dev, Dept Plant Sci Saskatchewan Res Council, GenServe Labs™                                                                                                                                                                             | Grewal T S, Rossnagel B G, Scoles G J. 2012: Mapping quantitative trait loci associated with spot blotch and net blotch resistance in a doubled-haploid barley population. Mol Breeding 30(1): 267-279.                                          |
| 477. Barley | Net blotch                      | Australia        | Murdoch Univ, Sch Biol Sci, State Agricul Biotechnol Ctr<br>Hermitage Res Stn, Dept Primary Ind & Fisheries<br>Dept Agric & Food                                                                                                                                     | Gupta S, Li CD, Loughman R et al. 2010. Quantitative trait loci and epistatic interactions in barley conferring resistance to net type net blotch ( <i>Pyrenophora teres</i> f. <i>teres</i> ) isolates. Plant Breeding 129(4): 362-             |

|             |                                                         |                               |                                                                                                                                                                                                                                                                                                                                                    |                                                                                                                                                                                                                                                                                           |
|-------------|---------------------------------------------------------|-------------------------------|----------------------------------------------------------------------------------------------------------------------------------------------------------------------------------------------------------------------------------------------------------------------------------------------------------------------------------------------------|-------------------------------------------------------------------------------------------------------------------------------------------------------------------------------------------------------------------------------------------------------------------------------------------|
|             |                                                         |                               | Hermitage Res Stn, Dept Primary Industries & Fisheries                                                                                                                                                                                                                                                                                             | 68.                                                                                                                                                                                                                                                                                       |
| 478. Barley | Net blotch                                              | Germany                       | JKI, Fed Res Inst Cultivated Plants, Inst Resistance Res & Stress Tolerance<br>Free Univ Berlin, Dept Physiol & Biochem Plants & Microbiol, Inst Biol                                                                                                                                                                                              | König J, Perovic D, Kopahnke D, Ordon F. 2013. Development of an efficient method for assessing resistance to the net type of net blotch ( <i>Pyrenophora teres</i> f. <i>teres</i> ) in winter barley and mapping of quantitative trait loci for resistance. Mol Breeding 32(3): 641-50. |
| 479. Barley | Leaf blotch                                             | Germany<br>Spain<br>Australia | Bavarian State Res Ctr Agric, Inst Crop Sci & Plant Breed, Germany<br>Univ Coruña, Dept Animal & Plant Biol & Eco, Spain<br>CSIC, Aula Dei Experim Stn, Dept Genet & Plant Product, Spain<br>Fundación ARAID, Spain<br>Plant Res Ctr, South Australian Res & Develop Inst, SARDI, Australia<br>Univ Adelaide, School Agric, Food & Wine, Australia | Hofmann K, Silvar C, Casas AM et al. 2013. Fine mapping of the <i>Rrs1</i> resistance locus against scald in two large populations derived from Spanish barley landraces. Theor Appl Genetics 126(12): 3091-102.                                                                          |
| 480. Barley | Barley yellow dwarf virus (BYDV)                        | China                         | Ludong Univ, School of Life Sci<br>Shanxi Agric Univ, Coll Agron<br>Natl Engineer Res Ctr Wheat                                                                                                                                                                                                                                                    | Zhao YH, Wang YF, Li RZ et al. 2011. Identification of <i>Yd2</i> genotype in barley with molecular markers and their application in molecular marker-assisted selection. Acta Agron Sin 37(09): 1683-88.                                                                                 |
| 481. Barley | BYDV                                                    | Germany                       | JKI, Bundesforschungsinstitut für Kulturpflanzen, Inst Resistenzforschung & Stresstoleranz                                                                                                                                                                                                                                                         | Riedel C, Habekuss A, Ordon F. 2010. Improvement of BYDV-tolerance in barley by pyramiding of tolerance alleles. JK-Archiv 424: 13-16.                                                                                                                                                    |
| 482. Barley | BYDV                                                    | Germany                       | JKI, Federal Res Ctr Cultivated Plants: Inst Breed Res Agricul Crops; Inst Resistance Res & Stress Tolerance; Inst Breed Res Horticultural Crops & Fruit Crops, Germany<br>Dept Biotechnol, N.I. Vavilov All-Russian Res Inst Plant Ind, Russia                                                                                                    | Scholz M, Ruge-Wehling B, Habekuss A et al. 2009. <i>Ryd4<sup>hb</sup></i> : A novel resistance gene introgressed from <i>Hordeum bulbosum</i> into barley and conferring complete and dominant resistance to the barley yellow dwarf virus. Theor Appl Genet 119(5): 837-49.             |
| 483. Barley | BYDV                                                    | Germany                       | JKI, Federal Res Inst Cultivated Plants, Inst Resistance Res & Stress Tolerance, Germany<br>Wageningen Univ, Graduate School Experim Plant Sci, Dept Plant Breed, Netherlands<br>Univ Rostock, Inst Land Use, Agrobiotechnol & Applied Res Bio- & Gene-Technol, Fac Agricul & Environm Sci, Germany                                                | Riedel C, Habekuss A, Schliephake E et al. 2011. Pyramiding of <i>Ryd2</i> and <i>Ryd3</i> conferring tolerance to a german isolate of Barley yellow dwarf virus-PAV (BYDV-PAV-ASL-1) leads to quantitative resistance against this isolate. Theor Appl Genet 123(1): 69-76.              |
| 484. Barley | BSMV-based VIGS of plant gene (- effect on resistance)  | USA<br>UK                     | N Dakota State Univ, Dept Plant Pathol, USA<br>James Hutton Inst, UK<br>Washington State Univ, Dept Crop & Soil Sci, USA<br>Univ Minnesota, Dept Plant Pathol, USA                                                                                                                                                                                 | Wang X, Richards J, Gross T et al. 2013. The rpg4-mediated resistance to wheat stem rust ( <i>Puccinia graminis</i> ) in barley ( <i>Hordeum vulgare</i> ) requires Rpg5, a second NBS-LRR gene, and an actin depolymerization factor. Mol Plant Microbe In 26(4): 407-18                 |
| 485. Barley | BSMV-based VIGS of plant gene ( + effect on resistance) | USA                           | Washington State Univ: Dept Crop & Soil Sci; School Mol Biosci; Dept Plant Pathol; USDA-ARS; Dept Plant Pathol<br>Univ Minnesota, Dept Plant Pathol                                                                                                                                                                                                | Zhang L, Lavery L, Gill U et al. 2009. A cation/proton-exchanging protein is a candidate for the barley <i>NecS1</i> gene controlling necrosis and enhanced defense response to stem rust. Theor Appl Genet 118(2): 385-97                                                                |
| 486. Barley | Powdery mildew                                          | Germany<br>Netherlands        | The Leibniz Inst Plant Genet & Crop Plant Res, Germany<br>WUR, Lab Plant Breed, Netherlands                                                                                                                                                                                                                                                        | Douchkov D, Johrde A, Nowara D et al. 2011. Convergent evidence for a role of WIR1 proteins during the interaction of barley with the powdery mildew fungus <i>Blumeria graminis</i> . J Plant Physiol 168(1): 20-29.(also in RNAi / silencing section)                                   |
| 487. Maize  | Common smut                                             | USA                           | Univ Minnesota: Dept Plant Biologic Sci; Dept Agron & Plant Genet; Dept                                                                                                                                                                                                                                                                            | Baumgarten AM, Suresh J, May G, Phillips RL. 2007. Mapping QTLs contributing to <i>Ustilago maydis</i> resistance in specific plant tissues of                                                                                                                                            |

|            |                                                 |                |                                                                                                                                                                                                                                                                                                                                                           |                                                                                                                                                                                                                                                         |
|------------|-------------------------------------------------|----------------|-----------------------------------------------------------------------------------------------------------------------------------------------------------------------------------------------------------------------------------------------------------------------------------------------------------------------------------------------------------|---------------------------------------------------------------------------------------------------------------------------------------------------------------------------------------------------------------------------------------------------------|
|            |                                                 |                | Eco, Evolution & Behavior<br>Pioneer Hi-bred Internatl, Inc.                                                                                                                                                                                                                                                                                              | maize. Theor Appl Genet 114(7): 1229-38.                                                                                                                                                                                                                |
| 488. Maize | Common smut                                     | China          | China Agricul Univ, Natl Maize Improv Ctr China<br>CAAS, Crop Res Inst                                                                                                                                                                                                                                                                                    | Ding JQ, Wang XM, Chander S, Li JS. 2008. Identification of QTL for maize resistance to common smut by using recombinant inbred lines developed from the Chinese hybrid Yuyu22. J Appl Genet 49(2): 147-54.                                             |
| 489. Maize | Fusarium rot                                    | Ukraine        | Ukrainian Acad Agricul Sci: S Plant Biotechnol Ctr; Natl Ctr Seed Growing & Seed Sci, Plant Breed & Genet Inst                                                                                                                                                                                                                                            | Kozhukhova NE, Sivolap YuM, Varenik BF, Sokolov VM. 2007. Marking loci responsible for resistance of maize to Fusarium rot. Cytol Genet 41(2): 98-102.                                                                                                  |
| 490. Maize | Fusarium rot                                    | Ukraine        | Ukrainian Acad Agricul Sci: S Plant Biotechnol Ctr; Natl Ctr Seed Growing & Seed Sci, Plant Breed & Genet Inst                                                                                                                                                                                                                                            | Kozhukhova NE, Syvolap YuM, Varenik BF, Sokolov VM. 2007. Marking of the loci encoding maize resistance to <i>Fusarium</i> . Tsitol Genet 41(2): 37-41.                                                                                                 |
| 491. Maize | Fusarium ear rot                                | China          | Sichuan Agricul Univ, Minist Educ, Maize Res Inst, Key Lab Crop Genet Resour & Improv                                                                                                                                                                                                                                                                     | Yuan GS, Xiang K, Zhang ZM et al. 2013. Analysis on the relationship between <i>Fusarium verticillioides</i> infection-induced genes and ear rot resistance in maize. J Food Agr Environ 11(2): 363-66.                                                 |
| 492. Maize | Fusarium ear rot                                | USA<br>Spain   | N Carolina State Univ, Dept Crop Sci, Raleigh, USA<br>CSIC, Mision Biol Galicia, Spain<br>USDA-ARS, Plant Sci Res Unit, USA                                                                                                                                                                                                                               | Zila, C. T., Samayoa, L. F., Santiago, R., Butron, A. and Holland, J. B. (2013). A genome-wide association study reveals genes associated with Fusarium ear rot resistance in a maize core diversity panel. G3: Genes Genomes Genetics 3(11): 2095-104. |
| 493. Maize | Gibberella ear rot                              | Canada<br>USA  | Univ Guelph , Dept Plant Agric , Canada<br>Southern Illinois Univ, Dept Plant Biol, USA<br>Univ Nebraska, Dept Agron & Horticul, USA                                                                                                                                                                                                                      | Yuan J, Liakat Ali M, Taylor J et al. 2008. A guanylyl cyclase-like gene is associated with Gibberella ear rot resistance in maize ( <i>Zea mays</i> L.). Theor Appl Genet 116(4): 465-79.                                                              |
| 494. Maize | Gibberella stalk rot                            | China          | China Agric Univ, Natl Maize Improv Ctr China                                                                                                                                                                                                                                                                                                             | Yang Q, Yin G, Guo Y et al. 2010. A major QTL for resistance to Gibberella stalk rot in maize. Theor Appl Genet 121(4): 673-87.                                                                                                                         |
| 495. Maize | Northern leaf blight                            | USA<br>Taiwan  | Cornell Univ: Dept Plant Pathol & Plant-Microbe Biol; Dept Plant Breed & Genet, USA<br>Natl Taiwan Univ, Dept Plant Pathol & Microbiol, Taiwan<br>Kansas State Univ, USDA-ARS, Dept Agron, USA<br>North Carolina State Univ, Dept Crop Sci, USA<br>Ohio State Univ, Dept Plant Pathol, USA<br>North Carolina State Univ, USDA-ARS, Dept Plant Pathol, USA | Chung CL, Poland J, Kump K et al. 2011. Targeted discovery of quantitative trait loci for resistance to northern leaf blight and other diseases of maize. Theor Appl Genet 123(2): 307-26.                                                              |
| 496. Maize | European corn borer<br>Mediterranean corn borer | Spain          | CSIC, Spanish Natl Res Council                                                                                                                                                                                                                                                                                                                            | Ordas B, Malvar RA, Santiago R, Butron A. 2010. QTL mapping for Mediterranean corn borer resistance in European flint germplasm using recombinant inbred lines. BMC Genomics 11: 174.                                                                   |
| 497. Maize | European corn borer                             | Germany<br>USA | Univ Hohenheim, Inst Plant Breed Seed Sci & Populat Genet, Germany<br>AgReliant Genet, USA                                                                                                                                                                                                                                                                | Orsini E, Krchov LM, Uphaus J et al. 2012. Mapping of QTL for resistance to first and second generation of European corn borer using an integrated SNP and SSR linkage map. Euphytica 183(2): 197-206.                                                  |
| 498. Maize | Mediterranean corn borer                        | Spain          | Spanish Natl Res Council (CSIC), Misión Biológica Galicia                                                                                                                                                                                                                                                                                                 | Ordas B, Malvar RA, Santiago R et al. 2009. Mapping of QTL for resistance to the Mediterranean corn borer attack using the intermated B73 x Mo17 (IBM) population of maize. Theor Appl Genet 119(8): 1451-                                              |

|                |                     |                             |                                                                                                                                                                                                                                                                   |                                                                                                                                                                                                                                                                                                                                                              |
|----------------|---------------------|-----------------------------|-------------------------------------------------------------------------------------------------------------------------------------------------------------------------------------------------------------------------------------------------------------------|--------------------------------------------------------------------------------------------------------------------------------------------------------------------------------------------------------------------------------------------------------------------------------------------------------------------------------------------------------------|
|                |                     |                             |                                                                                                                                                                                                                                                                   | 59.                                                                                                                                                                                                                                                                                                                                                          |
| 499. OSR       | Blackleg            | Canada                      | Agric & Agri-Food Canada, Saskatoon Res Ctr<br>Natl Res Council of Canada, Plant Biotechnol Inst                                                                                                                                                                  | Yu F, Lydiate DJ, Gugel RK et al. 2012. Introgression of <i>Brassica rapa</i> subsp. <i>sylvestris</i> blackleg resistance into <i>B. napus</i> . Mol Breeding 30(3): 1495-1506.                                                                                                                                                                             |
| 500. OSR       | Blackleg            | France                      | Univ Rennes 1, INRA, U Agrocampus Ouest, MR Améliorat Plantes & Biotechnol Vegetales                                                                                                                                                                              | Jestin C, Lode M, Vallee P et al. 2011. Association mapping of quantitative resistance for <i>Leptosphaeria maculans</i> in oilseed rape ( <i>Brassica napus</i> L.). Mol Breeding 27(3): 271-87.                                                                                                                                                            |
| 501. OSR       | Verticillium wilt   | Germany                     | Justus Liebig Univ, Dept Plant Breed<br>Georg August Univ, Div Plant Pathol & Crop Protect, Dept Crop Sci                                                                                                                                                         | Obermeier C, Hossain MA, Snowdon R et al. 2013. Genetic analysis of phenylpropanoid metabolites associated with resistance against <i>Verticillium longisporum</i> in <i>Brassica napus</i> . Mol Breeding 31(2): 347-61.                                                                                                                                    |
| 502. OSR       | Verticillium wilt   | Germany<br>Sweden<br>Canada | Justus Liebig Univ, Res Ctr BioSyst Land Use & Nutr, Dept Plant Breed, Germany<br>Svalöf Weibull AB, Sweden<br>DNA Landmarks Inc, Canada                                                                                                                          | Rygulla W, Snowdon RJ, Friedt W et al. 2008. Identification of quantitative trait loci for resistance against <i>Verticillium longisporum</i> in oilseed rape ( <i>Brassica napus</i> ). Phytopathology 98(2): 215-21.                                                                                                                                       |
| 503. OSR       | Cabbage seed weevil | Canada                      | Univ Guelph, Dept Plant Agric, Crop Sci Building                                                                                                                                                                                                                  | Lee RW, Malchev IT, Rajcan I, Kott LS. 2013. Identification of putative quantitative trait loci associated with a flavonoid related to resistance to cabbage seedpod weevil ( <i>Ceutorhynchus obstrictus</i> ) in canola derived from an intergeneric cross, <i>Sinapis alba</i> x <i>Brassica napus</i> . Theor Appl Genet. DOI 10.1007/s00122-013-2228-0. |
| 504. Sunflower | Downy mildew        | Bulgaria                    | AgroBioInst<br>Univ Forestry<br>General Toshevo, Dobroudja Agric Inst                                                                                                                                                                                             | Hvarleva T, Tarpomanova I, Hristova-Cherbadiji M et al. 2009. Toward marker assisted selection for fungal disease resistance in sunflower. Utilization of <i>H. bolanderi</i> as a source of resistance to downy mildew. Biotechnol Biotech Eq, 23 (4), 2009: 1427-30.                                                                                       |
| 505. Sunflower | Downy mildew        | Serbia                      | Inst of Field & Vegetable Crops, Oil Crops Dept                                                                                                                                                                                                                   | Jocić S, Cvejić S, Hladni N et al. 2010. Development of sunflower genotypes resistant to downy mildew. HELIA 33( 53): 173-80.                                                                                                                                                                                                                                |
| 506. Sunflower | Downy mildew        | USA                         | Univ Georgia, Ctr Appl Genetic Technol, USA<br>Univ Zagazig, Efficient Productivity Inst, Plant Production Dept, Egypt<br>Oregon State Univ, Dept Crop & Soil Sci, USA<br>Univ Massachusetts, Dept Biol, USA<br>Univ California, Dept Plant Sci & Genome Ctr, USA | Radwan O, Gandhi S, Heesacker A et al. 2008. Genetic diversity and genomic distribution of homologs encoding NBS-LRR disease resistance proteins in sunflower. Mol Genet Genomics 280(2): 111-25.                                                                                                                                                            |
| 507. Sunflower | Phoma black stem    | France                      | INP-ENSAT, Lab Biotechnol Améliorat Plantes                                                                                                                                                                                                                       | Darvishzadeh R, Kiani SP, Dechamp-Guillaume G et al. 2007. Quantitative trait loci associated with isolate specific and isolate nonspecific partial resistance to <i>Phoma macdonaldii</i> in sunflower. Plant Pathol 56(5) : 855-61.                                                                                                                        |
| 508. Sunflower | Rust                | Argentina                   | Nidera S.A., Dept Biotechnol                                                                                                                                                                                                                                      | Bulos M, Ramos ML, Altieri E, Sala CA. 2013. Molecular mapping of a sunflower rust resistance gene from Har6. Breed Sci 63(1): 141-46.                                                                                                                                                                                                                       |
| 509. Sunflower | Rust                | USA                         | North Dakota State Univ, Dept Plant Pathol<br>USDA-ARS, Northern Crop Sci Lab                                                                                                                                                                                     | Gong L, Gulya TJ, Markell SG et al. 2013. Genetic mapping of rust resistance genes in confection sunflower line HA-R6 and oilseed line RHA 397. Theor Appl Genet 126(8): 2039-49.                                                                                                                                                                            |
| 510. Sunflower | Rust                | USA                         | North Dakota State Univ, Dept Plant Pathol                                                                                                                                                                                                                        | Gong L, Hulke BS, Gulya TJ et al. 2013. Molecular tagging of a novel rust                                                                                                                                                                                                                                                                                    |



|                |              |                 |                                                                                                                                                                                                                                                                                                                                             |                                                                                                                                                                                                                                                                        |
|----------------|--------------|-----------------|---------------------------------------------------------------------------------------------------------------------------------------------------------------------------------------------------------------------------------------------------------------------------------------------------------------------------------------------|------------------------------------------------------------------------------------------------------------------------------------------------------------------------------------------------------------------------------------------------------------------------|
|                |              |                 | USDA-ARS, Northern Crop Sci Lab                                                                                                                                                                                                                                                                                                             | resistance gene $R_{12}$ in sunflower ( <i>Helianthus annuus</i> L.). Theor Appl Genet 126(1): 93-99.                                                                                                                                                                  |
| 511. Sunflower | Rust         | USA             | USDA-ARS, Northern Crop Sci Lab                                                                                                                                                                                                                                                                                                             | Qi L, Gulya T, Seiler GJ et al. 2011. Identification of resistance to new virulent races of rust in sunflowers and validation of DNA markers in the gene pool. Phytopathology 101(2): 241-49.                                                                          |
| 512. Sunflower | Rust         | USA             | USDA-ARS, Northern Crop Sci Lab                                                                                                                                                                                                                                                                                                             | Qi LL, Seiler GJ, Vick BA, Gulya TJ. 2012. Genetics and mapping of the $R_{11}$ gene conferring resistance to recently emerged rust races, tightly linked to male fertility restoration, in sunflower ( <i>Helianthus annuus</i> L.). Theor Appl Genet 125(5): 921-32. |
| 513. Sunflower | Rust         | USA             | USDA-ARS, Northern Crop Sci Lab                                                                                                                                                                                                                                                                                                             | Qi LL, Hulke BS, Vick BA, Gulya TJ. 2011. Molecular mapping of the rust resistance gene $R_4$ to a large NBS-LRR cluster on linkage group 13 of sunflower. Theor Appl Genet 123(2): 351-58.                                                                            |
| 514. Sunflower | Sclerotinia  | Iran<br>France  | Tarbiat Moallem Univ, Dept Biol, Fac Sci, Iran<br>Urmia Univ: Inst Biotechnol; Fac Agric, Dept Agron & Plant Breed; Dept Plant Protect, Iran<br>INP ENSAT, IFR 40, Lab Biotechnol & Améliorat Plantes BAP, France                                                                                                                           | Davar R, Darvishzadeh R, Majd A et al. 2010. QTL mapping of partial resistance to basal stem rot in sunflower using recombinant inbred lines. Phytopathol Mediter 49(3): 330-41.                                                                                       |
| 515. Sunflower | Sclerotinia  | USA             | USDA-ARS, North Crop Sci Lab; Genom & Bioinf Res Unit<br>N Dakota State Univ, Dept Plant Sci<br>BioDiagnostics Inc.                                                                                                                                                                                                                         | Talukder ZI, Hulke BS, Qi L et al. 2013. Candidate gene association mapping of Sclerotinia stalk rot resistance in sunflower ( <i>Helianthus annuus</i> L.) uncovers the importance of <i>COI1</i> homologs. Theor Appl Genet 127(1): 193-209.                         |
| 516. Sunflower | Sclerotinia  | Argentina       | CICVyA INTA: Inst Biotechnol; Estn Expt Agr Balcarce; Estn Expt Agric Manfredi<br>Univ Nacl Cordoba: Fac Ciencias Agric, Catedra Estadist & Biometria<br>Univ Buenos Aires, Fac Ciencias Exactas & Nat                                                                                                                                      | Fusari CM, Di Rienzo JA, Troglia C et al. 2012. Association mapping in sunflower for Sclerotinia head rot resistance. BMC Plant Biol 12: 93.                                                                                                                           |
| 517. Sunflower | Sclerotinia  | USA             | N Dakota State Univ, Dept Plant Sci<br>Dow AgroSci<br>USDA-ARS, No Crop Sci Lab<br>Univ Georgia, Ctr Appl Genet Technol                                                                                                                                                                                                                     | Yue B, Radi SA, Vick BA et al. 2008. Identifying quantitative trait loci for resistance to Sclerotinia head rot in two USDA sunflower germplasms. Phytopathology 98(8): 926-31.                                                                                        |
| 518. Grapevine | Downy mildew | India           | Natl Res Ctr for Grapes                                                                                                                                                                                                                                                                                                                     | Upadhyay A, Deokar KP, Reddy S et al. 2008. Identification of micro satellite markers associated with downy mildew resistance in grape - An example of association mapping in perennial crops. Acta Hort (ISHS) 785: 153-58.                                           |
| 519. Grapevine | Downy mildew | Italy<br>France | Univ Udine, Dept Sci Agrarie & Ambientali, Italy<br>Univ Verona, Dept Biotechnol, Italy<br>Inst Natl Recherche Agronomique, UMR1131 Santé Vigne & Qualité Vin, France<br>Univ Strasbourg, UMR1131, France<br>INRA-CNRS-UEVE, UMR Génomique Végétale, France<br>Ist Genomica Applicata, Parco Scientifico & Tecnologico Luigi Danieli, Italy | Bellin D, Peressotti E., Merdinoglu D et al. 2009. Resistance to <i>Plasmopara viticola</i> in grapevine 'Bianca' is controlled by a major dominant gene causing localised necrosis at the infection site. Theor Appl Genet 120(1): 163-76.                            |

|                |                                |                            |                                                                                                                                                                                                                                                                                                                      |                                                                                                                                                                                                                                                                                                                                                                     |
|----------------|--------------------------------|----------------------------|----------------------------------------------------------------------------------------------------------------------------------------------------------------------------------------------------------------------------------------------------------------------------------------------------------------------|---------------------------------------------------------------------------------------------------------------------------------------------------------------------------------------------------------------------------------------------------------------------------------------------------------------------------------------------------------------------|
| 520. Grapevine | Downy mildew                   | France                     | Univ Bordeaux, UMR 1287 Ecophysiologie & Génomique Fonctionnelle Vigne (EGFV)<br>Inst Sci Vigne & Vin (ISVV), UMR 1287 Ecophysiologie & Génomique Fonctionnelle Vigne<br>INRA: UMR 1287 Ecophysiologie & Génomique Fonctionnelle Vigne (EGFV), Bât. ISVV, 210 Chemin de Leysotte; UMR 1131 Santé Vigne & Qualité Vin | Marguerit E, Boury C, Manicki A et al. 2009. Genetic dissection of sex determinism, inflorescence morphology and downy mildew resistance in grapevine. Theor Appl Genet 118(7): 1261-78.                                                                                                                                                                            |
| 521. Grapevine | Downy mildew                   | France<br>Germany          | Inst Natl Recherche Agronomique, UMR 1131 Santé Vigne & Qualité Vin, France<br>Univ Strasbourg, UMR 1131 Santé Vigne & Qualité Vin, France<br>Geisenheim Res Ctr Hochschule RheinMain, Germany                                                                                                                       | Blasi P, Blanc S, Wiedemann-Merdinoglu S et al. 2011. Construction of a reference linkage map of <i>Vitis amurensis</i> and genetic mapping of <i>Rpv8</i> , a locus conferring resistance to grapevine downy mildew. Theor Appl Genet 123(1): 43-53.                                                                                                               |
| 522. Grapevine | Downy mildew                   | Germany                    | JKI, Inst Grapevine Breed Geilweilerhof                                                                                                                                                                                                                                                                              | Schwander F, Eibach R, Fechter I et al. 2012. <i>Rpv10</i> : A new locus from the asian vitis gene pool for pyramiding downy mildew resistance loci in grapevine. Theor Appl Genet 124(1): 163-76.                                                                                                                                                                  |
| 523. Grapevine | Downy mildew<br>Anthracnose    | Thailand                   | Suranaree Univ Technol<br>Ctr Excellence Agricul Biotechnol (AG-BIO/PERDO-CHE)                                                                                                                                                                                                                                       | Tantasawat PA, Poolsawat O, Prajongjai T et al. 2012. Association of RGA-SSCP markers with resistance to downy mildew and anthracnose in grapevines. Genet Mol Res 11(3): 1799-1809.                                                                                                                                                                                |
| 524. Grapevine | Downy mildew<br>Powdery mildew | Bulgaria                   | AgroBioInst<br>Inst Seed Knowledge                                                                                                                                                                                                                                                                                   | Hvarleva T, Bakalova A, Rusanov K et al. 2009. Toward marker assisted selection for fungal disease resistance in grapevine. Biotechnol Biotech Eq 23(4): 1431-35.                                                                                                                                                                                                   |
| 525. Grapevine | Downy mildew<br>Powdery mildew | Germany                    | Federal Ctr Breed ResCultivated Plants, Inst Grapevine Breed                                                                                                                                                                                                                                                         | Eibach R, Zyprian E, Topfer R. 2009. The use of molecular markers for pyramiding resistance genes in grapevine breeding. Vitis 46 (2): 120-24.                                                                                                                                                                                                                      |
| 526. Grapevine | Downy mildew<br>Powdery mildew | Hungary                    | Szent Istvan Univ, Inst Genet & Biotechnol                                                                                                                                                                                                                                                                           | Katula-Debreceni D, Kiss E, Lencses AK et al. 2009. Marker assisted selection for powdery and downy mildew resistance genes of different origin in grapevine ( <i>Vitis vinifera</i> L.). Proceedings Bioexploit, EUCARPIA. Proceedings p. 57.                                                                                                                      |
| 527. Grapevine | Downy mildew<br>Powdery mildew | Australia<br>France<br>USA | CSIRO Plant Ind, Australia<br>Montpellier SupAgro, UMR AGAP, France<br>INRA: UMR1131 Sante Vigne & Qualite Vin; URGV; UMR AGAP, France<br>Universite' Strasbourg, Sante Vigne & Qualite Vin UMR1131, France<br>USDA-ARS, Grape Genet Res Unit, USA<br>Cornell Univ, Dept Horticul, NY Agricul Stn, USA               | Feechan A, Anderson C, Torregrosa L et al. 2013. Genetic dissection of a TIR-NB-LRR locus from the wild North American grapevine species <i>Muscadinia rotundifolia</i> identifies paralogous genes conferring resistance to major fungal and oomycete pathogens in cultivated grapevine. Plant J 76(4): 661-74. <b>(also in transgenesis section)</b> <sup>v</sup> |
| 528. Grapevine | Downy mildew<br>Powdery mildew | Italy<br>France            | Univ Udine, Dept Sci Agrarie e Ambientali, Italy<br>Ist Genomica Applicata, Italy<br>INRA-CNRS-UEVE, UMR de Génomique Végétale, France                                                                                                                                                                               | Di Gaspero G, Cipriani G, Adam-Blondon AF, Testolin R. 2007. Linkage maps of grapevine displaying the chromosomal locations of 420 microsatellite markers and 82 markers for <i>R</i> -gene candidates. Theor Appl Genet 114(7): 1249-63.                                                                                                                           |
| 529. Grapevine | Downy mildew<br>Powdery mildew | France                     | INRA: UMR1065 SAVE; UMR1131 SVQV<br>Univ Bordeaux, ISVV, UMR1065 SAVE<br>Univ Strasbourg, UMR1131 SVQV                                                                                                                                                                                                               | Calonne A, Wiedemann-Merdinoglu S, Deliere L et al. 2013. The reliability of leaf bioassays for predicting disease resistance on fruit: a case study on grapevine resistance to downy and powdery mildew Plant Pathol 62(3): 533-44.                                                                                                                                |

|                |                |                         |                                                                                                                                                                                                                                                                                             |                                                                                                                                                                                                                                                               |
|----------------|----------------|-------------------------|---------------------------------------------------------------------------------------------------------------------------------------------------------------------------------------------------------------------------------------------------------------------------------------------|---------------------------------------------------------------------------------------------------------------------------------------------------------------------------------------------------------------------------------------------------------------|
| 530. Grapevine | Powdery mildew | USA                     | Cornell Univ: Dept Plant Breed; Inst Genomic Diversity; Computational Biol Service Unit, Dept Horticul, NY State Agricul Experiment Stn<br>USDA-ARS Grape Genet Res Unit                                                                                                                    | Barba P, Cadle-Davidson L., Harriman J et al. 2014. Grapevine powdery mildew resistance and susceptibility loci identified on a high-resolution SNP map. Theor Appl Genet 127(1): 73-84.                                                                      |
| 531. Grapevine | Powdery mildew | USA<br>France           | Univ California, Dept Viticul & Enology, USA<br>UMR AGAP, Equipe Diversité & Adaptation Vigne & Espèces Méditerranéennes: Montpellier SupAgro; INRA France<br>Univ California, Foundation Plant Services, USA<br>UMR AGAP, Equipe Diversité & Adaptation Vigne & Espèces                    | Riaz S, Boursiquot JM, Dangl GS et al. 2013. Identification of mildew resistance in wild and cultivated Central Asian grape germplasm. BMC Plant Biol 13 : 149.                                                                                               |
| 532. Grapevine | Powdery mildew | USA<br>Canada           | USDA-ARS Grape Genet Res Unit, USA<br>USDA-ARS San Joaquin Valley Agricul Sci Ctr, USA<br>SRC Advanced Technol Initiative, USA<br>NY State Agricul Experiment Stn, Dept Horticultur Sci, USA<br>Stanford Univ, Dept Genet, USA<br>Nova Scotia Agricul Coll, Dept Plant & Animal Sci, Canada | Mahanil S, Ramming D, Cadle-Davidson M et al. 2012. Development of marker sets useful in the early selection of <i>Ren4</i> powdery mildew resistance and seedlessness for table and raisin grape breeding. Theor Appl Genet 124(1): 23-33.                   |
| 533. Grapevine | Powdery mildew | France                  | INRA-UDS, UMR 1131, Santé Vigne & Qualité Vin<br>Université de Strasbourg, Santé Vigne & Qualité Vin                                                                                                                                                                                        | Blanc S, Wiedemann-Merdinoglu S, Dumas V et al. . 2012). A reference genetic map of <i>Muscadinia rotundifolia</i> and identification of <i>Ren5</i> , a new major locus for resistance to grapevine powdery mildew. Theor Appl Genet 125 (8): 1663-75.       |
| 534. Grapevine | Powdery mildew | USA                     | Univ California, Deprt Viticul & Enology<br>USDA-ARS                                                                                                                                                                                                                                        | Riaz S, Tenscher AC, Ramming DW, Walker MA. 2011. Using a limited mapping strategy to identify major QTLs for resistance to grapevine powdery mildew ( <i>Erysiphe necator</i> ) and their use in marker-assisted breeding. Theor Appl Genet 122(6): 1059-73. |
| 535. Grapevine | Powdery mildew | Republic of Korea       | Fruits Res Division, Natl Inst Horticultur & Herbal Sci, Rural Develop Adm<br>Yeungnam Univ,Dept Horticultur Sci<br>Genome Res Ctr, Korea Res Inst Biosci & Biotechnol<br>Seoul Natl Univ: Dept Horticultur Sci; Res Inst Agric & Life Sci                                                  | Choi YJ, Yun HK, Park KS et al. 2010. Transcriptional profiling of ESTs responsive to <i>Rhizobium vitis</i> from 'Tamnara' grapevines ( <i>Vitis</i> sp.). J Plant Physiol 167(13): 1084-92.                                                                 |
| 536. Grapevine | Powdery mildew | Hungary<br>Italy<br>USA | Res Inst Viticul & Enology, Hungary<br>Univ Udine, Dept Sci Agrarie & Ambientali, Italy<br>Parco Scientifico & Tecnologico Luigi Danieli, Inst Genomica Applicata, Italy<br>Missouri State Univ, Dept Agric, USA<br>Szent István Univ, Inst Genet & Biotechnol, Hungary                     | Hoffmann S, Di Gaspero G, Kovacs L et al. 2008. Resistance to <i>Erysiphe necator</i> in the grapevine 'Kishmish vatkana' is controlled by a single locus through restriction of hyphal growth. Theor Appl Genet 116(3): 427-38.                              |
| 537. Grapevine | Powdery mildew | Italy<br>Hungary        | Univ Udine, Dept Scienze Agrarie & Ambientali, Italy<br>Missouri State Univ, Dept Agric & Biol, USA<br>Parco Scientifico & Tecnologico Luigi Danieli, Inst Genomica Applicata, Italy<br>Univ Pécs, Res Inst Viticul & Enology, Hungary                                                      | Coleman C, Copetti D, Cipriani G et al. 2009. The powdery mildew resistance gene <i>REN1</i> co-segregates with an NBS-LRR gene cluster in two Central Asian grapevines. BMC Genet 10: 89.                                                                    |
| 538. Grapevine | Powdery mildew | Hungary                 | Szent Istvan Univ, Inst Genet & Biotechnol                                                                                                                                                                                                                                                  | Katula-Debreceni D, Lencses AK, Szoke A et al. 2009. Utilization of powdery mildew resistance gene originating from <i>Muscadinia rotundifolia</i> Mich. Small and <i>Vitis vinifera</i> L. in grape breeding based on                                        |

|                |                         |                     |                                                                                                                                              |                                                                                                                                                                                                                                                                                                           |
|----------------|-------------------------|---------------------|----------------------------------------------------------------------------------------------------------------------------------------------|-----------------------------------------------------------------------------------------------------------------------------------------------------------------------------------------------------------------------------------------------------------------------------------------------------------|
| 539. Grapevine | Powdery mildew          | Hungary<br>USA      | Szent Istvan Univ, Inst Genet & Biotechnol, Hungary<br>Univ Pécs, Res Inst Viticul & Enology, Hungary<br>Missouri State Univ, Dept Biol, USA | marker assisted selection. Kertgazdaság - Horticulture 41(2): 82-91.<br><br>Katula-Debreceni D, Lencses AK, Szoke A et al. 2010. Marker-assisted selection for two dominant powdery mildew resistance genes introgressed into a hybrid grape population. Sci Hortic-Amsterdam 126(4): 448-53.             |
| 540. Grapevine | Powdery mildew          | Hungary             | Szent Istvan Univ, Inst Genet & Biotechnol                                                                                                   | Veres A, Katula-Debreceni D, Szoke A et al. 2012. Analysis of powdery mildew QTL linked SCAR marker in different grape varieties bred in Hungary. Kertgazdaság - Horticulture 44(1): 89-93.                                                                                                               |
| 541. Grapevine | Fungus mainly mildews   | Germany             | JKI, Fed Res Ctr Cultivated Plants, Inst Grapevine Breed                                                                                     | Eibach R, Topfer R, Hausmann L. 2010. Use of genetic diversity for grapevine resistance breeding. Mitt Klosterneuburg 60: 332-37. (Review)                                                                                                                                                                |
| 542. Grapevine | Grapevine fanleaf virus | USA                 | Univ Calif Davis, Dept Viticulture & Enol                                                                                                    | Hwang C F, Xu K N, Hu R et al. 2010. Cloning and characterization of xir1, a locus responsible for dagger nematode resistance in grape. Theor and Appl Genetics 121 (4): 789-799                                                                                                                          |
| 543. Grapevine | Grapevine fanleaf virus | South Africa<br>USA | Univ Stellenbosch, Dept Viticulture & Enol, Matieland<br>Univ Calif Davis, Dept Viticulture & Enol                                           | van Zyl S, Vivier M A and Walker M A. 2012. Xiphinema index and its relationship to grapevines: A review. South African J of Enology and Viticulture 33 (1): 21-32 (Review)                                                                                                                               |
| 544. Potato    | Late blight             | Poland<br>Germany   | Res Ctr Młochów, Plant Breed & Acclimatization Inst, Poland<br>JKI, Federal Res Ctr Cultivated Plants, Ins Breed Res Agricul Crops, Germany  | Slivka J, Jakuczun H, Lebecka R et al. 2007. Tagging QTLs for late blight resistance and plant maturity from diploid wild relatives in a cultivated potato ( <i>Solanum tuberosum</i> ) background. Theor Appl Genet 115(1): 101-12.                                                                      |
| 545. Potato    | Late blight             | Poland<br>Germany   | Res Ctr Młochów, Plant Breed & Acclimatization Inst –Natl Res Inst, Poland<br>Max Planck Inst Plant Breed Res, Germany                       | Smyda P, Jakuczun H, Debski K et al. 2013. Development of somatic hybrids <i>Solanum x michoacanum</i> Bitter. (Rydb.) (+) <i>S.tuberosum</i> L. and autofused 4x <i>S. x michoacanum</i> plants as potential sources of late blight resistance for potato breeding. Plant Cell Reports 32(8): 1231-41.   |
| 546. Potato    | Late blight             | Netherlands         | Wageningen Univ, Biosystematics Group, Res Ctr<br>Wageningen UR Plant Breed<br>Ctr BioSystems Genom                                          | Jacobs MM, Vosman B, Vleeshouwers VG et al. 2010. A novel approach to locate <i>Phytophthora infestans</i> resistance genes on the potato genetic map. Theor Appl Genet 120(4): 785-96.                                                                                                                   |
| 547. Potato    | Late blight             | India               | Central Potato Res Inst                                                                                                                      | Tiwari JK, Siddappa S, Singh BP et al. 2013. Molecular markers for late blight resistance breeding of potato: an update. Plant Breeding 132(3): 237-45.                                                                                                                                                   |
| 548. Potato    | Late blight             | Netherlands         | Wageningen Univ, Dept Plant Sci, Lab Plant Breed<br>Plant Res Internatl, Dept Biodiversity & Breed                                           | Malosetti M, van der Linden CG, Vosman B, van Eeuwijk FA. 2007. A mixed-model approach to association mapping using pedigree information with an illustration of resistance to <i>Phytophthora infestans</i> in potato. Genetics 175(2): 879-89.                                                          |
| 549. Potato    | Late blight             | Netherlands         | Wageningen Univ & Red Ctr, Lab Plant Breed                                                                                                   | Tan MY, Hutten RC, Celis C et al. 2008. The <i>R<sub>pi-mcd1</sub></i> locus from <i>Solanum microdontum</i> involved in resistance to <i>Phytophthora infestans</i> , causing a delay in infection, maps on potato chromosome 4 in a cluster of NBS-LRR genes. Mol Plant Microbe Interact 21(7): 909-18. |

|             |             |                                               |                                                                                                                                                                                                                                                                                         |                                                                                                                                                                                                                                                                        |
|-------------|-------------|-----------------------------------------------|-----------------------------------------------------------------------------------------------------------------------------------------------------------------------------------------------------------------------------------------------------------------------------------------|------------------------------------------------------------------------------------------------------------------------------------------------------------------------------------------------------------------------------------------------------------------------|
| 550. Potato | Late blight | France                                        | INRA: UR 1052 GAFL Génétique & Amélioration Fruits & Légumes; UMR 118 APBV Amélioration Plantes & Biotechnolog Végétales<br>Comité Nord, Stn Recherche de Bretteville                                                                                                                   | Danan S, Chauvin JE, Caromel B et al. 2009. Major-effect QTLs for stem and foliage resistance to late blight in the wild potato relatives <i>Solanum sparsipilum</i> and <i>S. spegazzinii</i> are mapped to chromosome X. Theor Appl Genet 119(4): 705-19.            |
| 551. Potato | Late blight | Germany                                       | Max Planck Inst Plant Breed Res, Dept Plant Breed & Genet<br>Univ Hohenheim, Inst Plant Breed, Seed Sci & Population Genet<br>Saka Pflanzenzucht GbR, Zuchtstation Windeby,<br>Bioplant GmbH<br>Böhm-Nordkartoffel Agrarproduktion GbR<br>Former RZPD German Resour Ctr Genome Res GmbH | Pajerowska-Mukhtar K, Stich B., Achenbach U et al. 2009. Single nucleotide polymorphisms in the allene oxide synthase 2 gene are associated with field resistance to late blight in populations of tetraploid potato cultivars. Genetics 181(3): 1115-27.              |
| 552. Potato | Late blight | Netherlands<br>UK                             | Wageningen UR Plant Breed, Netherlands<br>Sainsbury Lab Colney Lane, UK                                                                                                                                                                                                                 | Pel MA, Foster SJ, Park TH et al. 2009. Mapping and cloning of late blight resistance genes from <i>Solanum venturii</i> using an interspecific candidate gene approach. Mol Plant Microbe Interact 22(5): 601-15.                                                     |
| 553. Potato | Late blight | Germany                                       | Max-Planck Inst Plant Breed Res                                                                                                                                                                                                                                                         | Odeny DA, Stich B, Gebhardt C. 2010. Physical organization of mixed protease inhibitor gene clusters, coordinated expression and association with resistance to late blight at the <i>Stki</i> locus on potato chromosome III. Plant Cell Environ 33(12): 2149-61.     |
| 554. Potato | Late blight | Poland                                        | Młochów Res Ctr, Plant Breed & Acclimatization Inst<br>HZ Zamarte Ltd - IHAR Group                                                                                                                                                                                                      | Sliwka J, Jakuczun H, Kaminski P, Zimnoch-Guzowska E. 2010. Marker-assisted selection of diploid and tetraploid potatoes carrying <i>Rpi-phu1</i> , a major gene for resistance to <i>Phytophthora infestans</i> . J Appl Genet 51(2): 133-40.                         |
| 555. Potato | Late blight | Netherlands                                   | Wageningen Univ and Red Ctr, Lab Plant Breed                                                                                                                                                                                                                                            | Tan MY, Hutten RC, Visser RG et al. van Eck HJ. 2010. The effect of pyramiding <i>Phytophthora infestans</i> resistance genes <i>R<sub>pi-mcd1</sub></i> and <i>R<sub>pi-ber</sub></i> in potato. Theor Appl Genet 121(1): 117-25.                                     |
| 556. Potato | Late blight | France                                        | INRA, UR 1052 Génétique & Amélioration Fruits & Légumes (GAFL)<br>Inst Natl Recherche Agronomique (INRA-UPS-INA PG-CNRS), UMR 320 Génétique Végétale                                                                                                                                    | Danan S, Veyrieras JB, Lefebvre V. 2011. Construction of a potato consensus map and QTL meta-analysis offer new insights into the genetic architecture of late blight resistance and plant maturity traits. BMC Plant Biol 11: 16.                                     |
| 557. Potato | Late blight | Netherlands<br>DPR Korea                      | Wageningen Univ & Red Ctr: Lab Plant Breed; Plant Res Internatl, Netherlands<br>Acad Agric Sci, Res Inst Agrobiol, DPR Korea                                                                                                                                                            | Jo KR, Arens M, Kim TY et al. 2011. Mapping of the <i>S. demissum</i> late blight resistance gene <i>R8</i> to a new locus on chromosome IX. Theor Appl Genet 123(8): 1331-40.                                                                                         |
| 558. Potato | Late blight | Poland<br>Germany                             | Plant Breed & Acclimatization Inst, Poland<br>Polish Acad Sci, Inst Biochem & Biophysics, Poland<br>Max-Planck Inst Plant Breed Res, Germany                                                                                                                                            | Szajko K, Chrzanowska M, Witek K et al. 2008. The novel gene <i>Ny-1</i> on potato chromosome IX confers hypersensitive resistance to potato virus Y and is an alternative to <i>Ry</i> genes in potato breeding for PVY resistance. Theor Appl Genet 116(2): 297-303. |
| 559. Potato | Late blight | Netherlands<br>Republic of Korea<br>DPR Korea | Univ Wageningen & ResCtr, Wageningen UR Plant Breed, Netherlands<br>Nongwoo Bio. Co., Ltd, Biotechnol Inst, Republic of Korea<br>Acad Agric Sci, Res Inst Agrobiol, DPR Korea                                                                                                           | Kim HJ, Lee HR, Jo KR et al. 2012. Broad spectrum late blight resistance in potato differential set plants MaR8 and MaR9 is conferred by multiple stacked <i>R</i> genes. Theor Appl Genet 124(5): 923-35.                                                             |
| 560. Potato | Late blight | China<br>Peru                                 | Huazhong Agric Univ: Minist Educ, Key Lab Horticultural Plant Biol; Natl Ctr Vegetable Improv (Central China), Potato Engineer & Technol Res Ctr                                                                                                                                        | Li J, Lindqvist-Kreuze H, Tian Z et al. 2012. Conditional QTL underlying resistance to late blight in a diploid potato population. Theor Appl Genet                                                                                                                    |

|             |             |                      |                                                                                                                                                                                                                    |                                                                                                                                                                                                                                                            |
|-------------|-------------|----------------------|--------------------------------------------------------------------------------------------------------------------------------------------------------------------------------------------------------------------|------------------------------------------------------------------------------------------------------------------------------------------------------------------------------------------------------------------------------------------------------------|
|             |             |                      | Hubei Province, China<br>Internatl Potato Ctr, Peru                                                                                                                                                                | 124(7): 1339-50.                                                                                                                                                                                                                                           |
| 561. Potato | Late blight | Denmark<br>Argentina | Aarhus Univ, Dept Mol Biol, Denmark<br>Danish Potato Breed Stn (LKF-Vandel), Denmark<br>Inst Investigaciones en Ingeniería Genética & Biología Mol (INGEBI-CONICET), Argentina                                     | Orlowska E, Fiil A, Kirk HG et al. 2012. Differential gene induction in resistant and susceptible potato cultivars at early stages of infection by <i>Phytophthora infestans</i> . Plant Cell Rep 31(1): 187-203.                                          |
| 562. Potato | Late blight | Poland<br>Australia  | Młochów Res Ctr, Plant Breed & Acclimatization Inst, Poland<br>Diversity Arrays Technol Pty Ltd, Australia                                                                                                         | Sliwka J, Jakuczun H, Chmielarz M et al. 2012. Late blight resistance gene from <i>Solanum ruiz-ceballosii</i> is located on potato chromosome X and linked to violet flower colour. BMC Genet 13: 11.                                                     |
| 563. Potato | Late blight | Poland<br>Australia  | Młochów Res Ctr, Plant Breed & Acclimatization Inst, Poland<br>Diversity Arrays Technol Pty Ltd, Australia                                                                                                         | Sliwka J, Jakuczun H, Chmielarz M et al. 2012. A resistance gene against potato late blight originating from <i>Solanum x michoacanum</i> maps to potato chromosome VII. Theor Appl Genet 124(2): 397-406.                                                 |
| 564. Potato | Late blight | UK<br>Poland         | Sainsbury Lab; Genome Analysis Ctr, UK<br>Res Ctr Młochów, Plant Breed & Acclimatization Inst, Poland<br>James Hutton Inst: Information & Computational Sci; Cell Mol Sci, UK                                      | Jupe F, Witek K, Verweij W et al. 2013. Resistance gene enrichment sequencing (RenSeq) enables reannotation of the NB-LRR gene family from sequenced plant genomes and rapid mapping of resistance loci in segregating populations. Plant J 76(3): 530-44. |
| 565. Potato | Late blight | Poland<br>UK         | Młochów Res Ctr, Plant Breed & Acclimatization Inst, Poland<br>Potato Breed Zamarte Ltd-IHAR Group, Poland<br>JIC, Norwich Res Park, Sainsbury Lab, Norwich, UK<br>James Hutton Inst, UK                           | Tomczynska I, Stefanczyk E, Chmielarz M et al. 2014. A locus conferring effective late blight resistance in potato cultivar Sárpo Mira maps to chromosome XI. Theor Appl Genet 127(3): 647-57.                                                             |
| 566. Potato | Late blight | China                | Huazhong Agric Univ, Potato Engineer & Technol Res Ctr of Hubei Province, Natl Ctr Vegetable, Minist Educ, Improv Central China, Key Lab Hort Plant Biol<br>Enshi Acad Agric Sci, Southern Potato Res Ctr of China | Yao CG, Song BT, Liu J et al. 2011. Population improvement of resistance to late blight in tetraploid potato: a case study in combination with AFLP marker assisted background selection. Agr Sci China 10(8): 1177-87.                                    |
| 567. Potato | Late blight | China                | CAAS, Inst Vegetables & Flowers<br>Northeast Agricul Univ, Coll Agric                                                                                                                                              | Xu JF, Wang JJ, Pang WF et al. 2013. The potato <i>R10</i> resistance specificity to late blight is conferred by both a single dominant <i>R</i> gene and quantitative trait loci. Plant Breeding 132(4): 407-12.                                          |
| 568. Potato | Late blight | Argentina<br>Canada  | Internat Potato Ctr, Genetics & Crop Improv, Argentina<br>Agric & Agri-Food Canada, Canada                                                                                                                         | Lindqvist-Kreuze H, Gastelo M, Perez W et al. 2014. Phenotypic stability and genome wide association study of late blight resistance in potato genotypes adapted to the tropical highlands. Phytopathology 104(6):624-33.                                  |
| 569. Potato | Late blight | Netherlands          | Univ Wageningen & Res Ctr, Wageningen UR Plant Breed<br>Averis Seeds B.V.                                                                                                                                          | Verzaux E, Budding D, de Vetten N et al. 2011. High resolution mapping of a novel late blight resistance gene <i>Rpi-avl1</i> , from the wild bolivian species <i>Solanum avilesii</i> . Am J Pot Res 88(6): 511-19.                                       |
| 570. Potato | Late blight | USA                  | Penn State Univ, Univ Park, Dept Plant Pathol<br>USDA-ARS-PSI, Gen Improv Fruits & Vegetables Lab                                                                                                                  | Wickramasinghe WK, Qu XSS, Costanzo S et al. 2009. Development of PCR-based markers linked to quantitative resistance to late blight in a diploid hybrid potato population of <i>Solanum phureja</i> x <i>S. stenotomum</i> . Am J Pot Res 86(3): 188-95.  |
| 571. Potato | Late blight | USA                  | Penn State Univ, Univ Park, Dept Plant Pathol                                                                                                                                                                      | Wickramasinghe WK, Qu XSS, Costanzo S et al. 2007. PCR-based markers for marker assisted selection for quantitative resistance to late blight in                                                                                                           |

|             |                               |                                  |                                                                                                                                                                                                                                                                                                                                     |                                                                                                                                                                                                                                                                                                         |
|-------------|-------------------------------|----------------------------------|-------------------------------------------------------------------------------------------------------------------------------------------------------------------------------------------------------------------------------------------------------------------------------------------------------------------------------------|---------------------------------------------------------------------------------------------------------------------------------------------------------------------------------------------------------------------------------------------------------------------------------------------------------|
|             |                               |                                  |                                                                                                                                                                                                                                                                                                                                     | a diploid potato family. Phytopathology 97(7): s123.                                                                                                                                                                                                                                                    |
| 572. Potato | Late blight                   | Romania                          | Fac Agric, Univ Agric Sci & Veterinary Medicine<br>Natl High School of Agron, Dept Botany                                                                                                                                                                                                                                           | Botez C, Pamfil D, Taoutaou A et al. 2009. Preliminary results concerning marker assisted selection for potato resistance to <i>Phytophthora infestans</i> . Bulletin UASMV Agr 66 (1): 10-16.                                                                                                          |
| 573. Potato | Late blight<br>Potato Virus Y | Germany<br>Romania<br>Russia     | JKI, Federal Res Ctr Cultivated Plants: Inst Breed Res Agricul Crops; Inst Biosafety Genetically Modified Plants; Ins Plant Protect Field Crops & Grassland, Germany<br>Babeş-Bolyai Univ, Romania<br>N.I. Vavilov Inst Plant Ind, Russia<br>BTL Bio-Test Lab GmbH Sagerheide, Germany                                              | Thieme R, Rakosy-Tican E, Gavrilenco T et al. 2008. Novel somatic hybrids ( <i>Solanum tuberosum</i> L. + <i>Solanum tarnii</i> ) and their fertile BC1 progenies express extreme resistance to potato virus Y and late blight. Theor Appl Genet 116(5): 691-700.                                       |
| 574. Potato | Colorado potato beetle        | Chile<br>USA<br>Uganda           | Inst Invest Agropecuarias INIA, CRI Rayentue, Chile<br>N Dakota State Univ : Dept Plant Pathol; Dept Vet & Microbiol Sci, USA<br>USDA-ARS, No Crop Sci Lab, USA<br>Int Inst Trop Agric, Uganda                                                                                                                                      | Sagredo B, Balbyshev N, Lafta A et al. 2009. A QTL that confers resistance to Colorado potato beetle ( <i>Leptinotarsa decemlineata</i> Say) in tetraploid potato populations segregating for leptine. Theor Appl Genet 119(7): 1171-81.                                                                |
| 575. Potato | Golden nematode               | Poland                           | Res Ctr Młochów, Plant Breed & Acclimatizat Inst, Natl Res Inst                                                                                                                                                                                                                                                                     | Milczarek D. 2012. A Multiplex PCR method of detecting markers linked to genes conferring resistance to <i>Globodera rostochiensis</i> . Am J Pot Res 89(2): 169-71.                                                                                                                                    |
| 576. Potato | Golden nematode               | Poland<br>USA                    | Wroclaw Univ Environm & Life Sci, Fac Life Sci & Technol, Dept Genet, Plant Breed & Seed Product, Poland<br>Adam Mickiewicz Univ, Fac Biol, Dept Mol & Cellular Biol, Inst Mol Biol & Biotechnol, Poland<br>Cornell Univ, Dept Plant Breed & Genet, USA                                                                             | Galek R, Rurek M, De Jong et al. 2011. Application of DNA markers linked to the potato <i>H1</i> gene conferring resistance to pathotype Ro1 of <i>Globodera rostochiensis</i> . J Appl Genet 52(4): 407-11.                                                                                            |
| 577. Potato | Golden nematode               | Ukraine                          | Nat Acad Sci Ukraine : Inst Plant Protect; State Inst Food Biotechnol & Genom<br>Ustimivka Experim Stn Plant Growing                                                                                                                                                                                                                | Karelov AV, Pilipenko LA, Kozub NA et al. 2013. Allelic state of the molecular marker for the golden nematode ( <i>Globodera rostochiensis</i> ) resistance gene <i>H1</i> among Ukrainian and world cultivars of potato ( <i>Solanum tuberosum</i> ssp. <i>tuberosum</i> ). Tsitol Genet 47(5): 41-46. |
| 578. Potato | Potato cyst nematodes         | Poland                           | Res Ctr Młochów, Plant Breed & Acclimatizat Inst<br>Res Ctr Radzików, Plant Breed & Acclimatizat Inst                                                                                                                                                                                                                               | Milczarek D, Flis B, Przetakiewicz A. 2001. Suitability of molecular markers for selection of potatoes resistant to <i>Globodera</i> spp. Am J Pot Res 88(3): 245-55.                                                                                                                                   |
| 579. Potato | Potato cyst nematode          | France                           | INRA: Génétique & Amélioration Fruits & Légumes; Agrocampus Rennes, BiO3P (Biologie Organismes & Populations Appliquée Protection Plantes); Agrocampus Rennes, Amélioration Plantes & Biotechnolog Végétales                                                                                                                        | Jolivet K, Grenier E, Bouchet JP et al. 2007. Identification of plant genes regulated in resistant potato <i>Solanum sparsipilum</i> during the early stages of infection by <i>Globodera pallida</i> . Genome 50(4): 422-27.                                                                           |
| 580. Potato | Pale cyst nematode            | Germany<br>Netherlands<br>Canada | Dept Plant Breed & Genetics, Max Planck Inst Plant Breed Res, Germany<br>Rheinische Friedrich-Wilhelms-Univ Bonn, Inst Mol Physiol & Biotechnol Plants (IMBIO), Germany<br>Biometris, Wageningen Univ, Netherlands<br>DNA LandMarks Inc., Canada<br>Saka-Pflanzenzucht GbR, Zuchtstation Windeby, Germany<br>Bioplant GmbH, Germany | Achenbach U, Paulo J, Ilarionova E et al. 2009. Using SNP markers to dissect linkage disequilibrium at a major quantitative trait locus for resistance to the potato cyst nematode <i>Globodera pallida</i> on potato chromosome V. Theor Appl Genet 118(3): 619-29.                                    |

|             |                              |               |                                                                                                                                                                |                                                                                                                                                                                                                                                                                               |
|-------------|------------------------------|---------------|----------------------------------------------------------------------------------------------------------------------------------------------------------------|-----------------------------------------------------------------------------------------------------------------------------------------------------------------------------------------------------------------------------------------------------------------------------------------------|
|             |                              |               | Böhm-Nordkartoffel Agrarproduktion GbR, Germany                                                                                                                |                                                                                                                                                                                                                                                                                               |
| 581. Potato | Potato cyst nematodes        | Netherlands   | Wageningen Univ, Plant Sci Group: Lab Nematol; Lab Plant Breed                                                                                                 | Finkers-Tomczak A, Danan S, van Dijk T et al. 2009. A high-resolution map of the <i>Grp1</i> locus on chromosome v of potato harbouring broad-spectrum resistance to the cyst nematode species <i>Globodera pallida</i> and <i>Globodera rostochiensis</i> . Theor Appl Genet 119(1): 165-73. |
| 582. Potato | Pale cyst nematode           | Ireland<br>UK | Crops Res Ctr, Ireland<br>Univ Coll Cork, Dept Zoology, Ecol & Plant Sci, Ireland<br>Genet Programme, Scottish Crop Res Inst, UK                               | Moloney C, Griffin D, Jones PW et al.2010. Development of diagnostic markers for use in breeding potatoes resistant to <i>Globodera pallida</i> pathotype Pa2/3 using germplasm derived from <i>Solanum tuberosum</i> ssp. <i>andigena</i> CPC 2802. Theor Appl Genet 120(3): 679-89.         |
| 583. Potato | Potato cyst nematodes        | Japan         | NARO Hokkaido Agricul Res Ctr, Upland Farm Res Division                                                                                                        | Asano K., Kobayashi A, Tsuda S et al. 2012. DNA marker-assisted evaluation of potato genotypes for potential resistance to potato cyst nematode pathotypes not yet invading into Japan. Breed Sci 62(2): 142-50.                                                                              |
| 584. Potato | Potato Virus Y (PVY)         | India         | Cent Potato Res Inst Campus<br>Cent Tuber Crop Res Inst                                                                                                        | Kaushik SK, Sharma R, Garg ID et al. 2013. Development of a triplex (YYYy) parental potato line with extreme resistance to potato virus Y using marker assisted selection. J Hortic Sci Biotech 88(5): 580-84.                                                                                |
| 585. Potato | PVY                          | Poland<br>UK  | MłochówRes Ctr, Plant Breed & Acclimatization Inst - Natl Res Inst, Poland<br>JIC, Norwich ResPark, Sainsbury Lab, UK<br>James Hutton Inst, Cell & Mol Sci, UK | Tomczyńska I, Jupe F, Hein I et al. 2014. Hypersensitive response to Potato virus Y in potato cultivar Sárpo Mira is conferred by the <i>Ny-Smira</i> gene located on the long arm of chromosome IX. Mol Breeding: DOI 10.1007/s11032-014-0050-2.                                             |
| 586. Potato | PVY                          | Chile         | Ctr Reg Invest Rayentue, Carillanca & Remehue, Inst Investigaciones Agropecuarias INIA                                                                         | Sagredo B, Mathias M, Barrientos C et al. 2009. Evaluation of a SCAR RYSC3 marker of the <i>Ry<sub>adg</sub></i> gene to select resistant genotypes to potato virus Y (PVY) in the INIA potato breeding program. Chilean J Agric Res 69(3): 305-15.                                           |
| 587. Potato | PVY                          | Germany       | JKI, Federal Res Ctr for Cultivated Plants                                                                                                                     | Lindner K, Behn A, Schwarzfischer A, Song YS. 2011. Extreme resistance to Potato virus Y in potatoes of the German variety list. Journal für Kulturpflanzen 63(4): 97-103.                                                                                                                    |
| 588. Potato | PVY<br>Golden nematode       | Spain         | Appacale SA                                                                                                                                                    | Ortega F, Lopez-Vizcon C. 2012. Application of molecular marker-assisted selection (MAS) for disease resistance in a practical potato breeding programme. Potato Res 55(1): 1-13.                                                                                                             |
| 589. Potato | Potato leafroll virus (PLRV) | USA           | USDA-ARS, Crop Genet & Prod Res Unit<br>Univ Idaho R&E Ctr, Small Grains & Potato Res Unit, USDA-ARS                                                           | Gillen AM, Novy RG. 2007. Molecular characterization of the progeny of <i>Solanum etuberosum</i> identifies a genomic region associated with resistance to potato leafroll virus. Euphytica 155 (3): 403-15.                                                                                  |
| 590. Potato | PLRV                         | Peru          | Int Potato Ctr                                                                                                                                                 | Velasquez AC, Mihovilovich E, Bonierbale M. 2007. Genetic characterization and mapping of major gene resistance to potato leafroll virus in <i>Solanum tuberosum</i> ssp. <i>andigena</i> . Theor Appl Genet 114(6): 1051-58.                                                                 |
| 591. Beet   | Cercospora leaf spot         | Japan         | Natl Agric & Food Res Org, Hokkaido Agric Res Ctr, Memuro Upland Farming Res Div<br>Hokkaido Univ, Res Fac Agric, Lab Genet Engineer                           | Taguchi K, Kubo T, Takahashi H, Abe H. 2011. Identification and precise mapping of resistant QTLs of Cercospora leaf spot resistance in sugar beet ( <i>Beta vulgaris</i> L.). G3: Genes, Genomes, Genetics 1 (4): 283-91.                                                                    |



|           |                                                     |                         |                                                                                                                                                                                                   |                                                                                                                                                                                                                                               |
|-----------|-----------------------------------------------------|-------------------------|---------------------------------------------------------------------------------------------------------------------------------------------------------------------------------------------------|-----------------------------------------------------------------------------------------------------------------------------------------------------------------------------------------------------------------------------------------------|
| 592. Beet | Powdery mildew                                      | UK                      | Brooms Barn Res Strn                                                                                                                                                                              | Grimmer MK, Bean KMR, Asher MJC. 2007. Mapping of five resistance genes to sugar-beet powdery mildew using AFLP and anchored SNP markers. Theor Appl Genet 115(1): 67-75.                                                                     |
| 593. Beet | Rhizoctonia root rot                                | Germany                 | Univ Kiel, Plant Breed Inst<br>Inst Sugar Beet Res, Associated Inst at the Univ Göttingen<br>Martin-Luther-Univ Halle-Wittenberg, Inst Agric & Nutritional Sci<br>Strube-Dieckmann<br>KWS SAAT AG | Lein JC, Sagstetter CM, Schulte D et al. 2008. Mapping of Rhizoctonia root rot resistance genes in sugar beet using pathogen response-related sequences as molecular markers. Plant Breeding 127(6): 602-11.                                  |
| 594. Beet | Beet mild yellowing virus<br>Powdery mildew<br>Rust | UK<br>Belgium<br>Sweden | Brooms Barn Res Strn, UK<br>ADAS UK Ltd, UK<br>SESVanderHave, Belgium<br>Syngenta Seeds, Sweden                                                                                                   | James LC, Bean KMR, Grimmer MK et al. 2012. Varieties of the future: Identification of 'broad spectrum' genetic resistance in sugar beet. Int Sugar J 114 (1359): 164-68.                                                                     |
| 595. Beet | Rhizomania disease (BNYVV)                          | Italy<br>Iran           | Univ Padua, Dipart Agron Anim Alimenti Risorse Nat & Am, Italy<br>Sugar Beet Seed Inst, Iran                                                                                                      | Stevanato P, Trebbi D, Norouzi P et al. 2012. Identification of SNP markers linked to the <i>Rz1</i> gene in sugar beet. Int Sugar J 114(1366): 715-18.                                                                                       |
| 596. Beet | Rhizomania disease (BNYVV)                          | Iran                    | Univ Tehran, Dept Agron & Plant Breed<br>Sugar Beet Seed Inst<br>Univ Tabriz, Dept Crop Prod & Breed, Fac Agric<br>Univ Tehran, Dept Crop Prod & Breed                                            | Amiri R, Mesbah M, Moghaddam M et al. 2009. A new RAPD marker for beet necrotic yellow vein virus resistance gene in <i>Beta vulgaris</i> . Biol Plantarum 53(1): 112-19.                                                                     |
| 597. Beet | Rhizomania disease (BNYVV)                          | UK                      | Brooms Barn Res Ctr                                                                                                                                                                               | Asher MJC, Grimmer MK, Mutasa-Goettgens ES. 2009. Selection and characterization of resistance to <i>Polymyxa betae</i> , vector of beet necrotic yellow vein virus, derived from wild sea beet. Plant Pathol 58(2): 250-60.                  |
| 598. Beet | Rhizomania disease (BNYVV)                          | UK<br>Sweden            | Brooms Barn Res Ctr, UK<br>Syngenta Seeds AB, Sweden                                                                                                                                              | Grimmer MK, Kraft T, Francis SA, Asher MJC. 2008. QTL mapping of BNYVV resistance from the WB258 source in sugar beet. Plant Breeding 127(6): 650-52.                                                                                         |
| 599. Beet | Rhizomania disease (BNYVV)                          | UK                      | Brooms Barn Res Strn<br>Rothamsted Res                                                                                                                                                            | Grimmer M K, Trybush S., Hanley S et al. 2007. An anchored linkage map for sugar beet based on AFLP, SNP and RAPD markers and QTL mapping of a new source of resistance to beet necrotic yellow vein virus. Theor Appl Genet 114(7): 1151-60. |
| 600. Beet | Rhizomania disease (BNYVV)                          | Germany<br>China        | Univ Kiel, Plant Breed Inst, Dept Mol Phytopathol, Germany<br>Strube Dieckmann, Germany<br>Harbin Inst Technol, Dept Life Sci & Engineer, China<br>Yangzhou Univ, Dept Agron, China               | Lein JC, Asbach K., Tian YY et al. 2007. Resistance gene analogues are clustered on chromosome 3 of sugar beet and cosegregate with QTL for Rhizomania resistance. Genome 50(1): 61-71.                                                       |
| 601. Beet | Rhizomania disease (BNYVV)                          | Iran                    | Zanjan Univ<br>Univ Tehran, Coll Aboureihan<br>Sugar Beet Seed Inst                                                                                                                               | Nouhi A, Amiri R., Haghazari A et al. 2008. Tagging of resistance gene(s) to Rhizomania disease in sugar beet ( <i>Beta vulgaris</i> L.). Afr J Biotechnol 7(4): 430-33.                                                                      |

## Supplementary Material 5.

### Analysis of scientific articles about biotic stress (BS) challenges, reporting the use of transgenesis, cisgenesis, RNAi (stable and transient assays), mutagenesis, cloning, conventional breeding, and molecular markers to tag resistance genes and/or for marker assisted selection

When authors are in Europe, their country code is given in brackets with the number of articles.

(see [http://www.iso.org/iso/fr/home/standards/country\\_codes/country\\_names\\_and\\_code\\_elements.htm](http://www.iso.org/iso/fr/home/standards/country_codes/country_names_and_code_elements.htm))

(Some papers deal with several challenges and are listed as individual 'studies' in this compilation).

**Abbreviations:** BS, biotic stress; MAS, marker-assisted selection; RNAi, RNA interference

\*BS challenges not addressed in any article (71)

\*\*RNAi /silencing (stable and transient assays)

\*\*\*Molecular markers used to tag resistance genes and for MAS

| Crop<br>(Total studies<br>= 937) | BS challenge<br>(128) | Latin names                                                                                | Transgenesis<br>(Total = 80) | Cisgenesis<br>(Total = 3) | RNAi**<br>(Total = 52) | Other<br>transient<br>assays<br>(Total = 14) | Cloning of<br>resistance<br>gene<br>(Total = 8) | Mutagenesis<br>(Total = 6) | Conventional<br>breeding<br>(Total = 35) | MAS***<br>(Total = 739)                                                               |
|----------------------------------|-----------------------|--------------------------------------------------------------------------------------------|------------------------------|---------------------------|------------------------|----------------------------------------------|-------------------------------------------------|----------------------------|------------------------------------------|---------------------------------------------------------------------------------------|
| Wheat                            | Fungal diseases       |                                                                                            |                              |                           |                        |                                              |                                                 |                            |                                          |                                                                                       |
|                                  | Leaf (brown)<br>rust  | <i>Puccinia<br/>triticea</i><br>( <i>Puccinia<br/>recondita</i> f. sp.<br><i>tritici</i> ) | 4<br>(1 CH, 1<br>CH/FR)      | 0                         | 2                      | 2<br>(1 CH)                                  | 1<br>(1 CH/FR)                                  | 1                          | 7<br>(1 SE)                              | 158<br>(1 RO, 1 BG,<br>6 HU, 13 DE,<br>3 IT, 5 CH, 1<br>SK/DE, 2 TR,<br>1 SE, 2 CZ, 2 |

|  |                                                            |                                                                                                                          |                                      |   |                              |   |                |   |   |                                                                                                                                    |
|--|------------------------------------------------------------|--------------------------------------------------------------------------------------------------------------------------|--------------------------------------|---|------------------------------|---|----------------|---|---|------------------------------------------------------------------------------------------------------------------------------------|
|  |                                                            |                                                                                                                          |                                      |   |                              |   |                |   |   | UK, 1 FR, 3<br>PL, 1FR/CH, 1<br>DE/HU/PL, 1<br>IT/ES, 1<br>HU/UK, 1<br>IT/PL, 1<br>IT/DE)                                          |
|  | Stem rust                                                  | <i>Puccinia<br/>graminis</i>                                                                                             | 0                                    | 0 | 1                            | 0 | 0              | 1 | 4 | 100<br>(8 DE, 2 HU,<br>2 IT, 1 BG, 1<br>RO, 1 FR, 3<br>CH, 1 TR)                                                                   |
|  | Stripe (yellow)<br>rust                                    | <i>Puccinia<br/>striiformis</i>                                                                                          | 3<br>(1 CH)                          | 0 | 11<br>(1 DE)                 | 0 | 0              | 1 | 4 | 104<br>(6 UK, 1 HU,<br>2 DE, 1 RO,<br>3TR, 2 FR, 4<br>CH, 2 CZ)                                                                    |
|  | Bunts and<br>smuts                                         | <i>Ustilago<br/>tritici</i> , <i>Tilletia<br/>spp.</i> , <i>Urocystis<br/>agropyri</i>                                   | 0                                    | 0 | 0                            | 0 | 0              | 0 | 1 | 12<br>(2 RO, 1 DE)                                                                                                                 |
|  | Fusarioses (incl.<br>Fusarium head<br>blight)<br>Crown rot | <i>Fusarium<br/>graminearum</i><br>(Fusarium head<br>blight), <i>Fusarium<br/>spp.</i> ,<br><i>Microdochium<br/>spp.</i> | 13<br>(1 CH, 3 IT, 1<br>DE, 1 IT/FR) | 0 | 0                            | 0 | 1<br>(1 NL/CZ) | 0 | 3 | 70<br>(2 CZ, 5 DE, 1<br>HU, 1 RO, 3<br>AT, 1 UK, 1<br>FR, 2 BE, 1<br>NL/AT, 1<br>CZ/FR, 1<br>DE/AT, 1<br>UK/DE/AT/H<br>U, 1 DE/FR) |
|  | Powdery<br>mildew                                          | <i>Blumeria<br/>(Erysiphe)<br/>graminis</i>                                                                              | 6<br>(1 CH, 1<br>CH/FR)              | 0 | 4<br>(1 DE, 1<br>UK/DE, 1HU) | 0 | 0              | 1 | 3 | 42<br>(1 HU, 1 RO,<br>5 DE, 1 CH, 2<br>PL, 1 IT/ES, 1<br>IT/DE)                                                                    |

|                                                                                    |                                                                                      |   |   |   |   |   |   |   |                                |
|------------------------------------------------------------------------------------|--------------------------------------------------------------------------------------|---|---|---|---|---|---|---|--------------------------------|
| Septoria leaf blotch                                                               | <i>Mycosphaerella graminicola</i><br>(anamorph: <i>Septoria tritici</i> )            | 0 | 0 | 0 | 0 | 0 | 0 | 0 | 6<br>(2 RO, 1 NL/FR, 1 DE)     |
| Take-all                                                                           | <i>Gaeumannomyces graminis</i> var. <i>tritici</i><br>( <i>Ophiobolus graminis</i> ) | 2 | 0 | 0 | 0 | 0 | 0 | 0 | 2                              |
| Eyespot                                                                            | <i>Pseudocercospora herpotrichoides</i>                                              | 0 | 0 | 0 | 0 | 0 | 0 | 0 | 11<br>(2 DE, 1 FR, 5 UK, 1 PL) |
| Tan spot (yellow leaf spot)                                                        | <i>Drechslera (Pyrenophora) tritici-repentis</i>                                     | 0 | 0 | 0 | 0 | 0 | 0 | 2 | 18<br>(2 DE)                   |
| <b>Insect pests</b>                                                                |                                                                                      |   |   |   |   |   |   |   |                                |
| Hessian fly                                                                        | <i>Mayetiola destructor</i>                                                          | 0 | 0 | 1 | 0 | 0 | 0 | 2 | 12<br>(1 ES, 1 HU)             |
| Sunn pest                                                                          | <i>Eurygaster integriceps</i>                                                        | 0 | 0 | 0 | 0 | 0 | 0 | 1 | 1                              |
| Corn ground beetle*                                                                | <i>Zabrus tenebrioides</i>                                                           | 0 | 0 | 0 | 0 | 0 | 0 | 0 | 0                              |
| Grain aphid<br>Rose-grain aphid                                                    | <i>Sitobion avenae</i><br><i>Metopolophium dirhodum</i>                              | 0 | 0 | 2 | 0 | 0 | 0 | 0 | 0                              |
| Frit fly*                                                                          | <i>Oscinella frit</i>                                                                | 0 | 0 | 0 | 0 | 0 | 0 | 0 | 0                              |
| Chloropid gout fly*                                                                | <i>Chlorops pumilionis</i>                                                           | 0 | 0 | 0 | 0 | 0 | 0 | 0 | 0                              |
| Wheat blossom midge: orange<br>wheat blossom midge, yellow<br>wheat blossom midge* | <i>Sitodiplosis mosellana</i><br><i>Contarinia tritici</i>                           | 0 | 0 | 0 | 0 | 0 | 0 | 0 | 4                              |

|               |                                         |                                                                                                |                      |                   |                      |                               |                                   |                    |                              |                                                          |
|---------------|-----------------------------------------|------------------------------------------------------------------------------------------------|----------------------|-------------------|----------------------|-------------------------------|-----------------------------------|--------------------|------------------------------|----------------------------------------------------------|
|               | Cereal leaf beetle                      | <i>Oulema melanopus</i><br>( <i>Lema melanopa</i> )                                            | 0                    | 0                 | 0                    | 0                             | 0                                 | 0                  | 0                            | 1                                                        |
|               | <b>Viral diseases</b>                   | Vector                                                                                         |                      |                   |                      |                               |                                   |                    |                              |                                                          |
|               | Wheat dwarf virus (WDV)                 | Leafhoppers                                                                                    | 0                    | 0                 | 0                    | 1<br>(1 HU)                   | 0                                 | 0                  | 0                            | 1<br>(1CZ)                                               |
|               | Barley yellow dwarf virus (BYDV)        | Aphids                                                                                         | 0                    | 0                 | 1                    | 0                             | 0                                 | 0                  | 1                            | 10<br>(1 CZ, 1 SK /DE, 1 RO, 1 FR)                       |
|               | <b>Subtotal 639</b>                     |                                                                                                | <b>28</b>            | <b>0</b>          | <b>22</b>            | <b>3</b>                      | <b>2</b>                          | <b>4</b>           | <b>28</b>                    | <b>552</b>                                               |
| <b>Barley</b> | <b>Fungal diseases</b>                  | <b>Latin names</b>                                                                             | <b>Transgenesis</b>  | <b>Cisgenesis</b> | <b>RNAi**</b>        | <b>Other transient assays</b> | <b>Cloning of resistance gene</b> | <b>Mutagenesis</b> | <b>Conventional breeding</b> | <b>MAS***</b>                                            |
|               | Barley leaf (brown) rust                | <i>Puccinia hordei</i>                                                                         | 2<br>(1 DE/CH, 1 NL) | 0                 | 0                    | 0                             | 0                                 | 0                  | 0                            | 18<br>(1 CZ, 2 UK/NL, 2 NL, 2 NL/FR/DE, 1 NL/CZ, 1FR/NL) |
|               | Stem rust                               | <i>Puccinia graminis</i>                                                                       | 1<br>(1 NL)          |                   | 3<br>(1 UK)          |                               |                                   |                    |                              | 8<br>(1 NL, 1 UK, 1 IE/LV/UK)                            |
|               | Bunts and smuts                         | <i>Ustilago tritici</i> ,<br><i>Tilletia caries</i> , <i>T. laevis</i> , <i>T. controversa</i> | 0                    | 0                 | 0                    | 0                             | 0                                 | 0                  | 0                            | 1                                                        |
|               | Fusarioses (incl. Fusarium head blight) | <i>Fusarium graminearum</i> (Fusarium head blight), <i>Fusarium</i> spp.,                      | 1<br>(1 DE)          | 0                 | 2<br>(1 DE, 1 FR/DE) | 0                             | 0                                 | 0                  | 1                            | 8<br>(1 DE)                                              |

|  |                                                                                    |                                                                                                                                                   |                         |   |                            |            |   |             |   |                               |
|--|------------------------------------------------------------------------------------|---------------------------------------------------------------------------------------------------------------------------------------------------|-------------------------|---|----------------------------|------------|---|-------------|---|-------------------------------|
|  |                                                                                    | <i>Microdochium</i><br>spp.                                                                                                                       |                         |   |                            |            |   |             |   |                               |
|  | Powdery<br>mildew                                                                  | <i>Blumeria</i><br>( <i>Erysiphe</i> )<br><i>graminis</i>                                                                                         | 3<br>(1 DE, 1<br>DE/CH) | 0 | 3<br>(1 DE/NL, 2<br>UK/DE) | 1<br>(1DE) | 0 | 1<br>(1 DE) | 0 | 9<br>(2 CZ, 3 DE, 2<br>DE/ES) |
|  | Spot blotch                                                                        | <i>Bipolaris</i><br><i>sorokiniana</i><br>(teleomorph:<br><i>Helminthosporiu</i><br><i>m sativum</i> ,<br><i>Cochliobolus</i><br><i>sativus</i> ) | 0                       | 0 | 0                          | 0          | 0 | 0           | 0 | 6                             |
|  | Net blotch                                                                         | <i>Pyrenophora</i><br>( <i>Helminthospori</i><br><i>um</i> ) <i>teres</i>                                                                         | 0                       | 0 | 0                          | 0          | 0 | 0           | 0 | 4<br>(1 DE)                   |
|  | Leaf blotch                                                                        | <i>Rhynchosporiu</i><br><i>m secalis</i>                                                                                                          | 0                       | 0 | 0                          | 0          | 0 | 0           | 0 | 1<br>(1 DE/ES)                |
|  | <b>Insect pests</b>                                                                |                                                                                                                                                   |                         |   |                            |            |   |             |   |                               |
|  | Sunn pest*                                                                         | <i>Eurygaster</i><br><i>integriceps</i>                                                                                                           | 0                       | 0 | 0                          | 0          | 0 | 0           | 0 | 0                             |
|  | Corn ground<br>beetle*                                                             | <i>Zabrus</i><br><i>tenebrioides</i>                                                                                                              | 0                       | 0 | 0                          | 0          | 0 | 0           | 0 | 0                             |
|  | Grain aphid*<br>Rose-grain<br>aphid*<br>Bird cherry-out<br>aphid (wheat<br>aphid)* | <i>Sitobion avenae</i><br><i>Metopolophium</i><br><i>dirhodum</i><br><i>Rhopalosiphum</i><br><i>padi</i>                                          | 0                       | 0 | 0                          | 0          | 0 | 0           | 0 | 0                             |
|  | Cereal leaf<br>beetle*                                                             | <i>Oulema</i><br><i>melanopus</i><br>( <i>Lema</i><br><i>melanopa</i> )                                                                           | 0                       | 0 | 0                          | 0          | 0 | 0           | 0 | 0                             |
|  | Frit fly*                                                                          | <i>Oscinella frit</i>                                                                                                                             | 0                       | 0 | 0                          | 0          | 0 | 0           | 0 | 0                             |

|              |                                  |                                                                                                         |                     |                   |               |                               |                                   |                    |                              |                        |
|--------------|----------------------------------|---------------------------------------------------------------------------------------------------------|---------------------|-------------------|---------------|-------------------------------|-----------------------------------|--------------------|------------------------------|------------------------|
|              | Chloropid gout fly*              | <i>Chlorops pumilionis</i>                                                                              | 0                   | 0                 | 0             | 0                             | 0                                 | 0                  | 0                            | 0                      |
|              | <b>Viral diseases</b>            | Vector                                                                                                  |                     |                   |               |                               |                                   |                    |                              |                        |
|              | Barley yellow dwarf virus (BYDV) | Aphids                                                                                                  | 0                   | 0                 | 0             | 0                             | 0                                 | 0                  | 0                            | 5<br>(3 DE, 1 SK /DE ) |
|              | Wheat dwarf virus (WDV)*         | Leafhoppers                                                                                             | 0                   | 0                 | 0             | 0                             | 0                                 | 0                  | 0                            | 0                      |
|              | <b>Subtotal 78</b>               |                                                                                                         | <b>7</b>            | <b>0</b>          | <b>8</b>      | <b>1</b>                      | <b>0</b>                          | <b>1</b>           | <b>1</b>                     | <b>60</b>              |
| <b>Maize</b> | <b>Fungal diseases</b>           | <b>Latin names</b>                                                                                      | <b>Transgenesis</b> | <b>Cisgenesis</b> | <b>RNAi**</b> | <b>Other transient assays</b> | <b>Cloning of resistance gene</b> | <b>Mutagenesis</b> | <b>Conventional breeding</b> | <b>MAS***</b>          |
|              | Common smut                      | <i>Ustilago zeae</i> (U. maydis)                                                                        | 1                   | 0                 | 0             | 0                             | 0                                 | 0                  | 0                            | 2                      |
|              | Fusarioses                       | <i>Fusarium</i> spp. (conidial form of <i>F. graminearum</i> : <i>Gibberella zeae</i> )                 | 1                   | 0                 | 0             | 0                             | 0                                 | 0                  | 0                            | 6<br>(1 ES)            |
|              | Northern leaf blight             | <i>Setosphaeria turcica</i> (anamorph: <i>Exserohilum</i> ( <i>Helminthosporium</i> ) <i>turcicum</i> ) | 0                   | 0                 | 0             | 0                             | 0                                 | 0                  | 0                            | 1                      |
|              | <b>Insect (arthropod) pests</b>  |                                                                                                         |                     |                   |               |                               |                                   |                    |                              |                        |
|              | European corn borer              | <i>Ostrinia nubilalis</i>                                                                               | 0                   | 0                 | 0             | 0                             | 0                                 | 0                  | 0                            | 2<br>(1 DE, 1 ES)      |
|              | Corn rootworm                    | <i>Diabrotica</i> spp.                                                                                  | 0                   | 0                 | 1<br>(1 BE)   | 0                             | 0                                 | 0                  | 0                            | 0                      |
|              | Wireworm (click                  | <i>Agriotes</i> spp.                                                                                    | 0                   | 0                 | 0             | 0                             | 0                                 | 0                  | 0                            | 0                      |

|                             |                                            |                                                                |                     |                   |               |                                       |                                           |                    |                                  |               |
|-----------------------------|--------------------------------------------|----------------------------------------------------------------|---------------------|-------------------|---------------|---------------------------------------|-------------------------------------------|--------------------|----------------------------------|---------------|
|                             | beetle)*                                   |                                                                |                     |                   |               |                                       |                                           |                    |                                  |               |
|                             | Corn earworm<br>(cotton<br>bollworm)       | <i>Helicoverpa<br/>(Heliothis)<br/>armigera</i>                | 1                   | 0                 | 0             | 0                                     | 0                                         | 0                  | 0                                | 0             |
|                             | Maize leaf (gray<br>corn) weevil *         | <i>Tanymecus<br/>dilaticollis</i>                              | 0                   | 0                 | 0             | 0                                     | 0                                         | 0                  | 0                                | 0             |
|                             | Mediterranean<br>corn borer                | <i>Sesamia<br/>nonagrioides</i>                                | 0                   | 0                 | 0             | 0                                     | 0                                         | 0                  | 0                                | 2<br>(2 ES)   |
|                             | Symphylan*                                 | <i>Scutigerella<br/>immaculata</i>                             | 0                   | 0                 | 0             | 0                                     | 0                                         | 0                  | 0                                | 0             |
|                             | Spider mite*                               | <i>Tetranychus<br/>spp.</i>                                    | 0                   | 0                 | 0             | 0                                     | 0                                         | 0                  | 0                                | 0             |
|                             | Cereal fly*<br>Frit fly*                   | <i>Geomyza spp.<br/>Oscinella spp.</i>                         | 0                   | 0                 | 0             | 0                                     | 0                                         | 0                  | 0                                | 0             |
|                             | Leafhopper*<br>Maize orange<br>leafhopper* | <i>Zyginidia<br/>scutellaris<br/>Cicadulina<br/>bipunctata</i> | 0                   | 0                 | 0             | 0                                     | 0                                         | 0                  | 0                                | 0             |
|                             | Rose-grain<br>aphid*<br>Grain aphid*       | <i>Metopolophium<br/>dirhodum<br/>Sitobion avenae</i>          | 0                   | 0                 | 0             | 0                                     | 0                                         | 0                  | 0                                | 0             |
|                             | Corn seed<br>maggot*                       | <i>Delia platura</i>                                           | 0                   | 0                 | 0             | 0                                     | 0                                         | 0                  | 0                                | 0             |
|                             | Cutworm*                                   | <i>Agrotis spp.</i>                                            | 0                   | 0                 | 0             | 0                                     | 0                                         | 0                  | 0                                | 0             |
| <b>Subtotal 17</b>          |                                            |                                                                | <b>3</b>            | <b>0</b>          | <b>1</b>      | <b>0</b>                              | <b>0</b>                                  | <b>0</b>           | <b>0</b>                         | <b>13</b>     |
| <b>Oilseed rape<br/>OSR</b> | <b>Fungal diseases</b>                     | <b>Latin names</b>                                             | <b>Transgenesis</b> | <b>Cisgenesis</b> | <b>RNAi**</b> | <b>Other<br/>transient<br/>assays</b> | <b>Cloning of<br/>resistance<br/>gene</b> | <b>Mutagenesis</b> | <b>Conventional<br/>breeding</b> | <b>MAS***</b> |
|                             | Light leaf spot*                           | <i>Pyrenopeziza<br/>brassicae</i>                              | 0                   | 0                 | 0             | 0                                     | 0                                         | 0                  | 0                                | 0             |
|                             | Gray leaf spot*                            | <i>Alternaria</i>                                              | 0                   | 0                 | 0             | 0                                     | 0                                         | 0                  | 0                                | 0             |



| brassicae    |                                    |                                                                              |          |   |   |   |   |   |   |                   |
|--------------|------------------------------------|------------------------------------------------------------------------------|----------|---|---|---|---|---|---|-------------------|
|              | Sclerotinia (white mold)           | <i>Sclerotinia sclerotiorum</i>                                              | 7        | 0 | 0 | 0 | 1 | 0 | 0 | 0                 |
|              | Blackleg (Phoma stem canker)       | <i>Leptosphaeria maculans</i> (anamorph: <i>Phoma lingam</i> )               | 1        | 0 | 0 | 0 | 1 | 0 | 0 | 2 (1 FR)          |
|              | Clubroot                           | Rhizaria: <i>Plasmodiophora brassicae</i>                                    | 1 (1 DE) | 0 | 0 | 0 | 0 | 0 | 0 | 0                 |
|              | White leaf spot*                   | <i>Pseudocercospora capsellae</i>                                            | 0        | 0 | 0 | 0 | 0 | 0 | 0 | 0                 |
|              | Ring spot*                         | <i>Mycosphaerella brassicicola</i>                                           | 0        | 0 | 0 | 0 | 0 | 0 | 0 | 0                 |
|              | Verticillium wilt                  | <i>Verticillium longisporum</i> (V. <i>dahliae</i> var. <i>longisporum</i> ) | 0        | 0 | 0 | 0 | 0 | 0 | 0 | 2 (1 DE, 1 SE/DE) |
|              | Powdery mildew*                    | <i>Erysiphe cruciferarum</i>                                                 | 0        | 0 | 0 | 0 | 0 | 0 | 0 | 0                 |
|              | Downy mildew*                      | <i>Hyaloperonospora brassicae</i>                                            | 0        | 0 | 0 | 0 | 0 | 0 | 0 | 0                 |
| Insect pests |                                    |                                                                              |          |   |   |   |   |   |   |                   |
|              | Rape stem weevil*                  | <i>Ceutorhynchus napi</i>                                                    | 0        | 0 | 0 | 0 | 0 | 0 | 0 | 0                 |
|              | Cabbage seed weevil                | <i>Ceutorhynchus assimilis</i>                                               | 0        | 0 | 0 | 0 | 0 | 0 | 0 | 1                 |
|              | Stem weevil (terminal bud weevil)* | <i>Ceutorhynchus picitarsis</i>                                              | 0        | 0 | 0 | 0 | 0 | 0 | 0 | 0                 |
|              | Brassica pod midge*                | <i>Dasineura brassicae</i>                                                   | 0        | 0 | 0 | 0 | 0 | 0 | 0 | 0                 |
|              | Turnip sawfly*                     | <i>Athalia rosae</i>                                                         | 0        | 0 | 0 | 0 | 0 | 0 | 0 | 0                 |

|                    |                                                                |                                                       |                     |                   |               |                               |                                   |                    |                              |               |
|--------------------|----------------------------------------------------------------|-------------------------------------------------------|---------------------|-------------------|---------------|-------------------------------|-----------------------------------|--------------------|------------------------------|---------------|
|                    | Cabbage stem flea beetle*                                      | <i>Psylliodes chrysocephala</i>                       | 0                   | 0                 | 0             | 0                             | 0                                 | 0                  | 0                            | 0             |
|                    | Pollen beetle*                                                 | <i>Meligethes aeneus</i>                              | 0                   | 0                 | 0             | 0                             | 0                                 | 0                  | 0                            | 0             |
|                    | Cabbage aphid*<br>Green peach aphid (green fly)*               | <i>Brevicoryne brassicae</i><br><i>Myzus persicae</i> | 0                   | 0                 | 0             | 0                             | 0                                 | 0                  | 0                            | 0             |
|                    | Flea beetle*                                                   | <i>Phyllotreta</i> spp.                               | 0                   | 0                 | 0             | 0                             | 0                                 | 0                  | 0                            | 0             |
|                    | Cabbage root fly (maggot)*                                     | <i>Delia radicum</i>                                  | 0                   | 0                 | 0             | 0                             | 0                                 | 0                  | 0                            | 0             |
| <b>Subtotal 16</b> |                                                                |                                                       | 9                   | 0                 | 0             | 0                             | 2                                 | 0                  | 0                            | 5             |
| <b>Sunflower</b>   | <b>Fungal diseases</b>                                         | <b>Latin names</b>                                    | <b>Transgenesis</b> | <b>Cisgenesis</b> | <b>RNAi**</b> | <b>Other transient assays</b> | <b>Cloning of resistance gene</b> | <b>Mutagenesis</b> | <b>Conventional breeding</b> | <b>MAS***</b> |
|                    | Downy mildew                                                   | <i>Plasmopara halstedii</i><br><i>P. helianthi</i>    | 0                   | 0                 | 0             | 0                             | 0                                 | 0                  | 0                            | 3<br>(1 BG)   |
|                    | Phoma black stem                                               | <i>Phoma macdonaldii</i>                              | 0                   | 0                 | 0             | 0                             | 0                                 | 0                  | 0                            | 1<br>(1 FR)   |
|                    | Rust                                                           | <i>Puccinia helianthi</i>                             | 0                   | 0                 | 0             | 0                             | 0                                 | 0                  | 1                            | 6             |
|                    | Sclerotinia (white mold, basal stem rot, Sclerotinia head rot) | <i>Sclerotinia sclerotiorum</i>                       | 1                   | 0                 | 0             | 0                             | 1                                 | 0                  | 0                            | 4<br>(1 FR)   |
|                    | Botrytis bunch rot*                                            | <i>Botrytis cinerea</i>                               | 0                   | 0                 | 0             | 0                             | 0                                 | 0                  | 0                            | 0             |
|                    | Phomopsis stem canker*                                         | <i>Diaporthe helianthi</i>                            | 0                   | 0                 | 0             | 0                             | 0                                 | 0                  | 0                            | 0             |
|                    | Verticillium wilt                                              | <i>Verticillium</i>                                   | 0                   | 0                 | 0             | 0                             | 0                                 | 0                  | 1                            | 0             |

|                        |                              |                                    |                     |                   |               |                               |                                   |                    |                              |                                                        |
|------------------------|------------------------------|------------------------------------|---------------------|-------------------|---------------|-------------------------------|-----------------------------------|--------------------|------------------------------|--------------------------------------------------------|
| <i>dahliae</i>         |                              |                                    |                     |                   |               |                               |                                   |                    |                              |                                                        |
|                        | Charcoal rot*                | <i>Macrophomina phaseolina</i>     | 0                   | 0                 | 0             | 0                             | 0                                 | 0                  | 0                            | 0                                                      |
|                        | White blister rust*          | <i>Pustula helianthicola</i>       | 0                   | 0                 | 0             | 0                             | 0                                 | 0                  | 0                            | 0                                                      |
| <b>Insect pests</b>    |                              |                                    |                     |                   |               |                               |                                   |                    |                              |                                                        |
|                        | Wireworm (click beetle)*     | <i>Agriotes</i> spp.               | 0                   | 0                 | 0             | 0                             | 0                                 | 0                  | 0                            | 0                                                      |
|                        | Black bean aphid (blackfly)* | <i>Aphis fabae</i>                 | 0                   | 0                 | 0             | 0                             | 0                                 | 0                  | 0                            | 0                                                      |
|                        | Leaf curl plum aphid *       | <i>Brachycaudus helichrysi</i>     |                     |                   |               |                               |                                   |                    |                              |                                                        |
| <b>Parasitic plant</b> |                              |                                    |                     |                   |               |                               |                                   |                    |                              |                                                        |
|                        | Sunflower broomrape          | <i>Orobanche cumana</i>            | 0                   | 0                 | 0             | 0                             | 0                                 | 0                  | 1<br>(1 ES)                  | 0                                                      |
| <b>Weed</b>            |                              |                                    |                     |                   |               |                               |                                   |                    |                              |                                                        |
|                        | Common ragweed*              | <i>Ambrosia artemisiifolia</i>     | 0                   | 0                 | 0             | 0                             | 0                                 | 0                  | 0                            | 0                                                      |
| <b>Subtotal 19</b>     |                              |                                    | <b>1</b>            | <b>0</b>          | <b>0</b>      | <b>0</b>                      | <b>1</b>                          | <b>0</b>           | <b>3</b>                     | <b>14</b>                                              |
| <b>Grapevine</b>       | <b>Fungal diseases</b>       | <b>Latin names</b>                 | <b>Transgenesis</b> | <b>Cisgenesis</b> | <b>RNAi**</b> | <b>Other transient assays</b> | <b>Cloning of resistance gene</b> | <b>Mutagenesis</b> | <b>Conventional breeding</b> | <b>MAS***</b>                                          |
|                        | Downy mildew                 | <i>Plasmopara viticola</i>         | 1<br>(1 FR)         | 0                 | 0             | 3<br>(3 FR)                   | 0                                 | 0                  | 0                            | 13<br>(1 BG, 3 DE, 1 HU, 3 FR, 2 IT/FR, 1 FR/DE)       |
|                        | Powdery mildew               | <i>Erysiphe (Uncinula) necator</i> | 2<br>(1 FR)         | 0                 | 0             | 1                             | 0                                 | 0                  | 0                            | 18<br>(1 BG, 2 DE, 4 HU, 1 IT, 4 FR, 1 IT/FR, 1 IT/HU) |

|  |                                                               |                                                                                 |   |   |   |   |   |   |   |   |
|--|---------------------------------------------------------------|---------------------------------------------------------------------------------|---|---|---|---|---|---|---|---|
|  | Gray mold (grey mould, Botrytis bunch rot)*                   | <i>Botryotinia fuckeliana</i> (anamorph: <i>Botrytis cinerea</i> )              | 0 | 0 | 0 | 0 | 0 | 0 | 0 | 0 |
|  | <b>Insect (arthropod) pests</b>                               |                                                                                 |   |   |   |   |   |   |   |   |
|  | Grape leafroller*                                             | <i>Sparganothis pilleriana</i>                                                  | 0 | 0 | 0 | 0 | 0 | 0 | 0 | 0 |
|  | Grape leaf blister mite (grape bud mite, grape erineum mite)* | <i>Eriophyes (Colomerus, Phytoptus) vitis</i>                                   | 0 | 0 | 0 | 0 | 0 | 0 | 0 | 0 |
|  | Yellow spider mite*                                           | <i>Eotetranychus (Tetranychus) carpini</i>                                      | 0 | 0 | 0 | 0 | 0 | 0 | 0 | 0 |
|  | European grapevine moth*<br>Grapevine moth*                   | <i>Lobesia (Polychrosis) botrana</i><br><i>Eupoecilia ambiguella</i>            | 0 | 0 | 0 | 0 | 0 | 0 | 0 | 0 |
|  | Grape tortrix*                                                | <i>Argyrotaenia ljugiana</i>                                                    | 0 | 0 | 0 | 0 | 0 | 0 | 0 | 0 |
|  | <b>Viruslike diseases</b>                                     | Vector                                                                          |   |   |   |   |   |   |   |   |
|  | Flavescence dorée*<br>Bois noir (black wood)*                 | <i>Scaphoideus titanus</i><br><i>Hyalesthes obsoletus</i> and other planthoppes | 0 | 0 | 0 | 0 | 0 | 0 | 0 | 0 |
|  | <b>Viral diseases</b>                                         | Vector                                                                          |   |   |   |   |   |   |   |   |

|                     | Grapevine fanleaf virus (GFLV)                     | <i>Xiphinema index</i>                                                                        | 2 (1IT)                                 | 0          | 2 (1 FR) | 0                      | 0                          | 0           | 1 (1FR)               | 2                                                                           |
|---------------------|----------------------------------------------------|-----------------------------------------------------------------------------------------------|-----------------------------------------|------------|----------|------------------------|----------------------------|-------------|-----------------------|-----------------------------------------------------------------------------|
|                     | Grapevine leafroll-associated virus (GLRaV)        | Pseudococcidae Coccidae                                                                       | 0                                       | 0          | 1        | 1 (1 ES)               | 0                          | 0           | 0                     | 0                                                                           |
| <b>Subtotal 47</b>  |                                                    |                                                                                               | 5                                       | 0          | 3        | 5                      | 0                          | 0           | 1                     | 33                                                                          |
| Potato              | Fungal diseases                                    | Latin names                                                                                   | Transgenesis                            | Cisgenesis | RNAi**   | Other transient assays | Cloning of resistance gene | Mutagenesis | Conventional breeding | MAS***                                                                      |
|                     | Late blight                                        | <i>Phytophthora infestans</i>                                                                 | 13 (1 IE/DK/IT, 1 UK/PL/NL, 2 NL, 1 CZ) | 3 (3 NL)   | 4 (1 DE) | 4 (3 NL, 1 UK/NL)      | 3 (1 NL, 1 NL/UK)          | 0           | 0                     | 30 (7 NL, 1 RO, 4 PL, 3 DE, 2 FR, 1 DK, 2 PL/DE, 1 UK/NL, 2 PL/UK, 1 DE/RO) |
|                     | Deforming rust*                                    | <i>Aecidium cantense</i>                                                                      | 0                                       | 0          | 0        | 0                      | 0                          | 0           | 0                     | 0                                                                           |
|                     | Early blight                                       | <i>Alternaria solani</i>                                                                      | 2                                       | 0          | 0        | 0                      | 0                          | 0           | 0                     | 0                                                                           |
| <b>Insect pests</b> |                                                    |                                                                                               |                                         |            |          |                        |                            |             |                       |                                                                             |
|                     | Potato aphid*<br>Green peach aphid (green fly)     | <i>Macrosiphum euphorbiae</i><br>( <i>Siphonophora solanifolii</i> )<br><i>Myzus persicae</i> | 2                                       | 0          | 0        | 0                      | 0                          | 0           | 0                     | 0                                                                           |
|                     | Colorado potato beetle (ten-striped spearman, ten- | <i>Leptinotarsa</i> (Chrysomela, Doryphora, Polygramma)                                       | 4 (1 BG/PL)                             | 0          | 0        | 0                      | 0                          | 0           | 0                     | 1                                                                           |

[illegible]



|              |                                                                        |                                                                                                   |                     |                   |                         |                               |                                   |                    |                              |                                  |
|--------------|------------------------------------------------------------------------|---------------------------------------------------------------------------------------------------|---------------------|-------------------|-------------------------|-------------------------------|-----------------------------------|--------------------|------------------------------|----------------------------------|
|              | cyst nematode)*                                                        | <i>Heterobolbus schachtii</i>                                                                     |                     |                   |                         |                               |                                   |                    |                              |                                  |
|              | Stem nematode (stem and bulb eelworm)*                                 | <i>Ditylenchus dipsaci</i>                                                                        | 0                   | 0                 | 0                       | 0                             | 0                                 | 0                  | 0                            | 0                                |
|              | <b>Viral diseases</b>                                                  | Vector                                                                                            |                     |                   |                         |                               |                                   |                    |                              |                                  |
|              | Beet western yellows virus (BWYV)*<br>Beet mild yellowing virus (BMYW) | <i>Aphis fabae</i><br><i>Myzus persicae</i>                                                       | 0                   | 0                 | 0                       | 0                             | 0                                 | 0                  | 0                            | 1<br>(1 BE/UK/SE)                |
|              | Beet necrotic yellow vein virus (BNYVV) causing Rhizomania disease     | <i>Polymyxa betae</i>                                                                             | 1<br>(1 GR)         | 0                 | 2<br>(1 FI/SE, 1 NL/GR) | 1<br>(1 IT/FR)                | 0                                 | 0                  | 0                            | 7<br>(1 DE, 1 IT, 2 UK, 1 SE/UK) |
|              | Beet mosaic virus (BtMV)*                                              | <i>Aphis fabae</i><br><i>Myzus persicae</i>                                                       | 0                   | 0                 | 0                       | 0                             | 0                                 | 0                  | 0                            | 0                                |
|              | <b>Subtotal 17</b>                                                     |                                                                                                   | <b>1</b>            | <b>0</b>          | <b>2</b>                | <b>1</b>                      | <b>0</b>                          | <b>0</b>           | <b>0</b>                     | <b>13</b>                        |
| <b>Olive</b> | <b>Fungal diseases</b>                                                 | <b>Latin names</b>                                                                                | <b>Transgenesis</b> | <b>Cisgenesis</b> | <b>RNAi**</b>           | <b>Other transient assays</b> | <b>Cloning of resistance gene</b> | <b>Mutagenesis</b> | <b>Conventional breeding</b> | <b>MAS***</b>                    |
|              | Olive leaf spot (peacock spot)*                                        | <i>Spilocaea oleaginea</i><br>( <i>Cyloconium</i><br>( <i>Fusicladium</i> )<br><i>oleaginum</i> ) | 0                   | 0                 | 0                       | 0                             | 0                                 | 0                  | 0                            | 0                                |
|              | Verticillium wilt*                                                     | <i>Verticilium dahliae</i>                                                                        | 0                   | 0                 | 0                       | 0                             | 0                                 | 0                  | 0                            | 0                                |



|                           |                                                  |                                                                                                  |   |   |   |   |   |   |   |   |
|---------------------------|--------------------------------------------------|--------------------------------------------------------------------------------------------------|---|---|---|---|---|---|---|---|
|                           | Anthracnose*                                     | <i>Colletrotichum acutatum</i> ( <i>C. cingulata</i> )                                           | 0 | 0 | 0 | 0 | 0 | 0 | 0 | 0 |
| <b>Bacterial diseases</b> |                                                  |                                                                                                  |   |   |   |   |   |   |   |   |
|                           | Olive-knot disease*                              | <i>Pseudomonas syringae</i> pv. <i>savastanoi</i>                                                | 0 | 0 | 0 | 0 | 0 | 0 | 0 | 0 |
| <b>Insect pests</b>       |                                                  |                                                                                                  |   |   |   |   |   |   |   |   |
|                           | Olive fruit fly*                                 | <i>Bactrocera oleae</i> ( <i>Dacus</i> ( <i>Musca</i> ) <i>oleae</i> )                           | 0 | 0 | 0 | 0 | 0 | 0 | 0 | 0 |
|                           | Olive leaf moth (jasmine moth, olive leaf worm)* | <i>Palpita</i> ( <i>Margaronia</i> ) <i>unionalis</i>                                            | 0 | 0 | 0 | 0 | 0 | 0 | 0 | 0 |
|                           | Leopard moth*<br>Olive pyralid moth*             | <i>Zeuzera</i> ( <i>Phalaena</i> ) <i>pyrina</i> ( <i>P.esculi</i> )<br><i>Euzophera pinguis</i> | 0 | 0 | 0 | 0 | 0 | 0 | 0 | 0 |
|                           | Olive moth (olive kernel borer)*                 | <i>Prays oleae</i> ( <i>P. oleellus</i> )                                                        | 0 | 0 | 0 | 0 | 0 | 0 | 0 | 0 |
| <b>Subtotal 0</b>         |                                                  |                                                                                                  | 0 | 0 | 0 | 0 | 0 | 0 | 0 | 0 |

## Supplementary Material 6.

### List of recent European public research programs on nine crops and fruit trees using transgenesis and new techniques in the 13 countries studied

(Only research programs directly relevant to addressing the biotic stress challenges identified in this study are included. Some research programs included may comprise of a number of individual research components. The data presented is influenced by the level of response to questionnaires in the individual countries and therefore cannot be considered as an exhaustive summary. )

#### Abbreviations:

Belgium (BE), Bulgaria (BG), the Czech Republic (CZ), France (FR), Germany (DE), Hungary (HU), Italy (IT), Portugal (PT), Romania (RO), Spain (ES), Sweden (SE), Turkey (TR), and the United Kingdom (UK).

New techniques include RNAi, TALEN, CRISPR.

#### Note:

Some programs using micropropagation are not taken into account (they concern two programs to fight potato virus Y and virus S carried out in CZ).

| Country | Crop       | Novel traits through genetic engineering                                                                                                                                                                                 | Current stage                                                                                                                      |
|---------|------------|--------------------------------------------------------------------------------------------------------------------------------------------------------------------------------------------------------------------------|------------------------------------------------------------------------------------------------------------------------------------|
| BE      | Potato     | No current activities about resistance genes being introduced using genetic engineering. However, field research ongoing with genetically engineered potatoes that were made in The Netherlands.                         | On-going field trial (2011-2012).<br>T in the Netherlands                                                                          |
| BE      | Wheat      | GM fungal resistant in wheat is in development (Syngenta).                                                                                                                                                               | Field trials have been performed in different countries (not Belgium).                                                             |
| BG      | Grapevine  | Grapevine fanleaf virus (GFLV) resistance through coat protein transformation.                                                                                                                                           | Research terminated. Plants destroyed in T0.                                                                                       |
| BG      | Grapevine  | <i>R. radiobacter</i> ( <i>A. vitis</i> ) resistance through expression of sarcotoxin gene. Expression of the gene is driven by a wound inducible promoter, thus produced only at the sites of possible pathogen attack. | Research terminated. Plants destroyed in T0.                                                                                       |
| CZ      | OSR        | Phoma stem canker (blackleg, <i>Leptosphaeria maculans</i> ): experiments with signaling pathways in defense response against pathogen.                                                                                  | Laboratory experiments: preparation of the defense response elicitors derived from pathogen and their use for increase resistance. |
| CZ      | Plum tree  | Plum pox virus.                                                                                                                                                                                                          | Field trials. T (RNAi)                                                                                                             |
| CZ      | Potato     | Biotic stress: SPI gene (serine type inhibitor of proteases) to enhance resistance to pests and late blight.                                                                                                             | Effect on target organisms in laboratory and glasshouse experiments.                                                               |
| CZ      | Potato     | Potato leafroll virus (PLRV). The inserted gene for PLRV replicase to potato by transgenesis.                                                                                                                            | On-going research: potato with PLRV's coat proteins, potato with PLRV's replicase. T.                                              |
| CZ      | Sugar Beet | No current activities about resistance genes being introduced using genetic engineering.                                                                                                                                 | Three field trials (2011, 2012).                                                                                                   |

|    |                                  |                                                                                                                                                                                                                                                                                                                                                                                                                                                                                                                                                                                                 |                                                                                                                                                                                                                                                                       |
|----|----------------------------------|-------------------------------------------------------------------------------------------------------------------------------------------------------------------------------------------------------------------------------------------------------------------------------------------------------------------------------------------------------------------------------------------------------------------------------------------------------------------------------------------------------------------------------------------------------------------------------------------------|-----------------------------------------------------------------------------------------------------------------------------------------------------------------------------------------------------------------------------------------------------------------------|
|    |                                  | However, field research ongoing with transgenic sugar beet tolerant to glyphosate and Rhizomania (caused by beet necrotic yellow vein virus, BNYVV) that were made by private international companies.                                                                                                                                                                                                                                                                                                                                                                                          | T by private international companies.                                                                                                                                                                                                                                 |
| CZ | wheat                            | Grass powdery mildew ( <i>Blumeria graminis</i> ) characterization of interaction between pathogen and host (wheat), positional cloning of gene for resistance to grass powdery mildew.                                                                                                                                                                                                                                                                                                                                                                                                         | Laboratory experiments.                                                                                                                                                                                                                                               |
| CZ | wheat                            | Powdery mildew ( <i>Mycosphaerella graminicola</i> , sexual stage <i>Septoria tritici</i> ): identification of wheat gene of resistance, study of plant defense.                                                                                                                                                                                                                                                                                                                                                                                                                                | Laboratory experiments: experiments have shown that most of the tested varieties of wheat, both commercial and with specific resistance genes (not Czech origin), had not susceptible response to mildew's isolates, so the GM variety will be useful.                |
| CZ | Wheat                            | Wheat dwarf virus (WDV).                                                                                                                                                                                                                                                                                                                                                                                                                                                                                                                                                                        | On-going research (project started in 2012 till the end of 2015): to assess the level of resistance in wheat and to identify sources of resistance, which will enable the development of effective strategies and methods of grain protection. New techniques (RNAi). |
| DE | Barley                           | BARLEY-fortress is an international research consortium of public and private partners (with Australia) for the targeted exploitation of basal defence genes in barley with the aim to introgress and engineer broad and durable pathogen resistance into this major crop. In a combined marker-assisted backcrossing and transgenic approach in two German elite varieties of spring barley, valuable haplotypes of functionally validated genes of PTI are introgressed from landraces or wild barley, and selected combinations of genes are being used for stacked over-expression or RNAi. | On-going.                                                                                                                                                                                                                                                             |
| DE | Barley                           | dsRNAguard program to explore powdery mildew resistance.                                                                                                                                                                                                                                                                                                                                                                                                                                                                                                                                        | On-going.                                                                                                                                                                                                                                                             |
| DE | Barley                           | GMO strategies (using antimicrobial peptides).                                                                                                                                                                                                                                                                                                                                                                                                                                                                                                                                                  | Research level.                                                                                                                                                                                                                                                       |
| DE | Wheat                            | dsRNAguard program to explore <i>Fusarium</i> resistance.                                                                                                                                                                                                                                                                                                                                                                                                                                                                                                                                       | On-going.                                                                                                                                                                                                                                                             |
| DE | Wheat                            | Basic analysis concerning fungal resistance.                                                                                                                                                                                                                                                                                                                                                                                                                                                                                                                                                    | Public research, field trials from 2009-2011.                                                                                                                                                                                                                         |
| ES | Grapevine                        | Transformation aiming to give resistance to Downy mildew of grape ( <i>Plasmopara viticola</i> )                                                                                                                                                                                                                                                                                                                                                                                                                                                                                                | On-going research IRTA-CRAG.                                                                                                                                                                                                                                          |
| ES | Grapevine                        | Transformation aiming to give resistance to Grey mould ( <i>Botrytis cinerea</i> )                                                                                                                                                                                                                                                                                                                                                                                                                                                                                                              | On-going research IMIDA.                                                                                                                                                                                                                                              |
| ES | Grapevine                        | Transformation aiming to give resistance to Springworm ( <i>Sparganothis pilleriana</i> )                                                                                                                                                                                                                                                                                                                                                                                                                                                                                                       | On-going research, Universidad Santiago de Compostela.                                                                                                                                                                                                                |
| ES | Maize                            | Genes from Bt. European corn borer ( <i>Ostrinia nubilalis</i> , <i>Sesamia nonagroides</i> )                                                                                                                                                                                                                                                                                                                                                                                                                                                                                                   | Bt Maize commercial varieties cultivated on the field. 100.000 ha cultivated in 2012 in Spain.                                                                                                                                                                        |
| ES | Olive                            | Engineering resistance to Olive leaf spot ( <i>Cycloconium oleaginum</i> )                                                                                                                                                                                                                                                                                                                                                                                                                                                                                                                      | On-going research Universidad Malaga.                                                                                                                                                                                                                                 |
| ES | Plum tree                        | Plum pox virus.                                                                                                                                                                                                                                                                                                                                                                                                                                                                                                                                                                                 | Ended. T (RNAi)                                                                                                                                                                                                                                                       |
| FR | Apple, maize, OSR, potato, Wheat | "Genius" project (2012-2019). Proof of concept. Various stresses including biotic stress and Nitrogen Use Efficiency.                                                                                                                                                                                                                                                                                                                                                                                                                                                                           | On-going basic research. T and new techniques of genome editing.                                                                                                                                                                                                      |

|    |                                                    |                                                                                                                                                                                                                                                                                                                                                              |                                                                                                                                                                                               |
|----|----------------------------------------------------|--------------------------------------------------------------------------------------------------------------------------------------------------------------------------------------------------------------------------------------------------------------------------------------------------------------------------------------------------------------|-----------------------------------------------------------------------------------------------------------------------------------------------------------------------------------------------|
| FR | Barley                                             | Powdery mildew ( <i>Erysiphe graminis</i> ) genome sequenced by international consortium in order to understand why this fungal is biotrophe.                                                                                                                                                                                                                | On-going basic research. Possible development of barley resistant varieties using T.                                                                                                          |
| FR | Grapevine                                          | Transgenic grapevine rootstocks expressing the grapevine fanleaf virus (GFLV) resistance GFLV coat protein (CP) gene. Grafted stock is non-transgenic.                                                                                                                                                                                                       | Stopped: trial in Colmar (started in 2005) destroyed by an individual in September, 2009. Trial re-implemented but on August, 2010, 62 persons tore away the 70 vines.                        |
| FR | Grapevine                                          | Development of resistance strategies to challenge grapevine fanleaf virus (GFLV) resistance by genetic engineering.                                                                                                                                                                                                                                          | In progress.                                                                                                                                                                                  |
| FR | Plum tree                                          | Plum pox virus.<br>A bilateral project France-Romania called "BRANCUSI" (2013-2014 with extension for a new project). INRA Bordeaux and SCDP Bistrita (Research Station for Orchard Development)                                                                                                                                                             | Trials in greenhouses. T (RNAi)                                                                                                                                                               |
| HU | Grapevine                                          | Ferritin as an iron scavenger to reduce iron-catalysed oxidative stress (in biotic and abiotic stress).                                                                                                                                                                                                                                                      | Plants for testing at Corvinus University (since 2009). T.                                                                                                                                    |
| HU | Maize                                              | Transfer of GM <i>Bt</i> resistance trait into local lines and hybrids via crossing.                                                                                                                                                                                                                                                                         | NA (program stopped in 2012). T.                                                                                                                                                              |
| HU | Potato                                             | Coat protein-mediated potato virus Y (PVY) resistance.                                                                                                                                                                                                                                                                                                       | GM plants for testing at Potato Research Center, Pannon University (since 2011). T, MAS, and new techniques.                                                                                  |
| IT | Apple                                              | Resistant to <i>Venturia inaequalis</i> ; paper published in 2004 (Sansavini's group - Bologna University).                                                                                                                                                                                                                                                  | Never allowed to be field tested. T and MAS.                                                                                                                                                  |
| IT | Olive tree                                         | Resistance to fungi and tree shape (Rugini's group)                                                                                                                                                                                                                                                                                                          | Trial terminated in 2012 by government order.                                                                                                                                                 |
| IT | Wheat                                              | Expression of polygalacturonase-inhibiting for resistance to <i>Fusarium</i>                                                                                                                                                                                                                                                                                 | Laboratory research published. Never field tested.                                                                                                                                            |
| RO | Plum tree                                          | Plum pox virus.<br>A bilateral project France-Romania called "BRANCUSI" (2013-2014 with extension for a new project). INRA Bordeaux and SCDP Bistrita (Research Station for Orchard Development)                                                                                                                                                             | Trials in greenhouses in 2013. T (RNAi)                                                                                                                                                       |
| SE | Potato                                             | Resistance gene introduction (late blight disease).                                                                                                                                                                                                                                                                                                          | Application filed for commercial release (BASF).                                                                                                                                              |
| TR | Maize                                              | Attempts to introduce <i>Bt</i> maize varieties (resistant to European Corn Borer).                                                                                                                                                                                                                                                                          | Field trials have been terminated.                                                                                                                                                            |
| UK | To be evaluated in both <i>Brassica</i> and barley | Transgenic cereals and <i>Brassicas</i> with modified responses to pathogen-associated molecular patterns. This research will test how these responses contribute to quantitative disease resistance against foliar and root pathogens such as yellow rust and take-all diseases of wheat and stem canker of oilseed rape ( <i>Leptosphaeria maculans</i> ). | Collaborative EU-wide research program (PRR-CROP) funded under ERA-PG program, including industry. 'Proof of concept' in glasshouse trials.                                                   |
| UK | <i>Brassica</i> and barley                         | Expression of a cyanobacterial flavodoxin in plants results in enhanced resistance to a wide range of biotic, abiotic and xenobiotic stresses (increases yield).                                                                                                                                                                                             | Technology developed at public research institutes and technology Licensed by PBL ( <a href="http://www.pbltechnology.com">www.pbltechnology.com</a> ) to multinational agribusiness company. |
| UK | OSR                                                | Enhanced resistance to insects and slugs mediated through genes induced by UV-B in transgenic oilseed rape. The work will also test UV-B responsive gene function that could be used in traditional breeding approaches.                                                                                                                                     | On-going collaborative research to glasshouse trials.                                                                                                                                         |
| UK | Potato                                             | Blight resistance genes.                                                                                                                                                                                                                                                                                                                                     | Field trials.                                                                                                                                                                                 |

|           |                  |                                                                                                                                                                                                                                                                                                                                                                                                                                                                                                                                                                                                                 |                                                                                                                                                                                                                                                                                                                                                                                                         |
|-----------|------------------|-----------------------------------------------------------------------------------------------------------------------------------------------------------------------------------------------------------------------------------------------------------------------------------------------------------------------------------------------------------------------------------------------------------------------------------------------------------------------------------------------------------------------------------------------------------------------------------------------------------------|---------------------------------------------------------------------------------------------------------------------------------------------------------------------------------------------------------------------------------------------------------------------------------------------------------------------------------------------------------------------------------------------------------|
|           |                  |                                                                                                                                                                                                                                                                                                                                                                                                                                                                                                                                                                                                                 |                                                                                                                                                                                                                                                                                                                                                                                                         |
| <b>UK</b> | Potato           | Cysteine proteinase inhibitors (cystatins) that impair digestion of protein by feeding nematodes have been expressed in potato under the control of either a constitutive or tissue-specific promoter to deliver partial nematode resistance. This transgenic approach has been stacked with partial natural resistance to achieve full control of PCN. In a different transgenic approach, a non-lethal peptide is secreted from potato roots that interferes with nematode host-seeking behavior. A third approach utilises RNAi technology to deliver dsRNA from the potato plant to silence nematode genes. | Tested in both glasshouse and field trials. A number of field trials for cystatin-expressing plants were carried out at the University of Leeds Field Station running for 5 years from 1998. The peptide technology was tested in a field trial in 2008 (trial destroyed by protestors) and successfully in 2009. The RNAi technology was tested in a field trial in 2010. T and new techniques. Ended. |
| <b>UK</b> | Wheat            | 'Take All' resistance. Introduction of genes involved in avenacin biosynthesis from oats into wheat.                                                                                                                                                                                                                                                                                                                                                                                                                                                                                                            | On-going.                                                                                                                                                                                                                                                                                                                                                                                               |
| <b>UK</b> | Wheat            | Aphid resistance. Resistance gene isolated from peppermint plants and cloned into cereals.                                                                                                                                                                                                                                                                                                                                                                                                                                                                                                                      | Field trials planted in 2012.                                                                                                                                                                                                                                                                                                                                                                           |
| <b>UK</b> | Wheat            | Introduction of cloned resistance genes against wheat rusts from wild relatives of wheat with a view to mobilising these in bread wheat as a transgene cassette containing multiple resistance genes.                                                                                                                                                                                                                                                                                                                                                                                                           | On-going research, evaluation under glass.                                                                                                                                                                                                                                                                                                                                                              |
| <b>UK</b> | Wheat and barley | Yellow rust resistance.                                                                                                                                                                                                                                                                                                                                                                                                                                                                                                                                                                                         | Testing under glass. The group would consider evaluation of this and/or future traits of interest if funding and public attitudes were more favorable to do so.                                                                                                                                                                                                                                         |

## Supplementary Material 7.

Recent field trial notifications in Europe concerned with biotic stress (BS) challenges (2003-2013)

Source: [http://gmoinfo.jrc.ec.europa.eu/gmp\\_browser.aspx](http://gmoinfo.jrc.ec.europa.eu/gmp_browser.aspx)

| Number | Notification Number         | Member State | Publication | Name of the Institutes or Companies                                           | Title of the Project                                                                                                                                                                                                      |
|--------|-----------------------------|--------------|-------------|-------------------------------------------------------------------------------|---------------------------------------------------------------------------------------------------------------------------------------------------------------------------------------------------------------------------|
| 1.     | <a href="#">B/ES/13/19</a>  | Spain        | 07/05/2013  | Instituto Nacional de Investigación y Tecnología Agraria y Alimentaria (INIA) | Field trial of maize Bt11 x MIR604 x GA21 under AMIGA Project: Assessing and Monitoring Impacts of Genetically modified plants on Agro-ecosystems (AMIGA 289706 SPI cooperation).                                         |
| 2.     | <a href="#">B/ES/13/15</a>  | Spain        | 20/03/2013  | LIMAGRAIN IBERICA                                                             | Field trial of maize genetically modified to resist lepidopters larvae and tolerate glyphosate.                                                                                                                           |
| 3.     | <a href="#">B/ES/13/09</a>  | Spain        | 20/03/2013  | Monsanto Europe, S.A., represented by Monsanto Agricultura España, S.L.       | Continuation of multiannual field trials, under official supervision, for registration of maize varieties containing NK603 x MON 810, genetically modified for tolerance to glyphosate and protected against corn borers. |
| 4.     | <a href="#">B/RO/13/01</a>  | Romania      | 06/02/2013  | Monsanto Europe, S.A                                                          | Notification according to Directive 2001/18/EC, Part B, for the deliberate release of NK603 x MON 810 maize for the use in field trials in Romania.                                                                       |
| 5.     | <a href="#">B/NL/12/L02</a> | Netherlands  | 10/01/2013  | Wageningen University                                                         | Selection of genetic modified potato plants for late blight resistance III.                                                                                                                                               |
| 6.     | <a href="#">B/IE/12/01</a>  | Ireland      | 13/03/2012  | Teagasc                                                                       | Assessing and monitoring the impact on the agri-environment of genetically modified potatoes with resistance to <i>Phytophthora infestans</i> , causative organism of late blight disease (2012 – 2016).                  |
| 7.     | <a href="#">B/NL/11/05</a>  | Netherlands  | 14/11/2011  | BASF Plant Science GmbH                                                       | Application for the release into the environment of potato lines with improved resistance to <i>Phytophthora infestans</i> according to the Genetically Modified Organisms Decree, 2012 – 2018.                           |
| 8.     | <a href="#">B/SE/11/652</a> | Sweden       | 03/02/2011  | BASF Plant Science GmbH                                                       | Application for the release into the environment of potato lines with an improved resistance to <i>Phytophthora infestans</i> .                                                                                           |
| 9.     | <a href="#">B/NL/10/06</a>  | Netherlands  | 23/12/2010  | Stichting Dienst Landbouwkundig                                               | Potato late blight control strategies and monitoring of <i>Phytophthora infestans</i> virulence.                                                                                                                          |

|     |                                |                |            |                                                      |                                                                                                                                                                                      |
|-----|--------------------------------|----------------|------------|------------------------------------------------------|--------------------------------------------------------------------------------------------------------------------------------------------------------------------------------------|
|     |                                |                |            | Onderzoek (DLO)                                      |                                                                                                                                                                                      |
| 10. | <a href="#">B/BE/10/V1</a>     | Belgium        | 13/12/2010 | University of Ghent                                  | Two year field trial with genetically modified potatoes that are less susceptible to late blight ( <i>Phytophthora infestans</i> ).                                                  |
| 11. | <a href="#">B/BE/10/V2</a>     | Belgium        | 13/12/2010 | BASF Plant Science GmbH                              | Application for the release into the environment of potato lines with improved resistance to <i>Phytophthora infestans</i> , 2011 and 2012.                                          |
| 12. | <a href="#">B/ES/10/22-CON</a> | Spain          | 01/03/2010 | Syngenta Seeds SAS                                   | Field trials of genetically modified Rhizomania resistant SBVR111 sugar beet to be carried out in 2010. Rhizomania disease is caused by the beet necrotic yellow vein virus (BNYVV). |
| 13. | <a href="#">B/FR/09/11/01</a>  | France         | 25/02/2010 | INRA - Institut National de la Recherche Agronomique | Expérimentation en milieu non-confiné de porte-greffes transgéniques de vigne exprimant le gène de la protéine de capsid du Grapevine fanleaf virus (GFLV) (In French in text) *     |
| 14. | <a href="#">B/NL/09/02</a>     | Netherlands    | 10/02/2010 | Wageningen University                                | Selection of genetic modified potato plants for late blight resistance II.                                                                                                           |
| 15. | <a href="#">B/GB/10/R29/01</a> | United Kingdom | 09/02/2010 | The Sainsbury Laboratory                             | Improving late blight ( <i>Phytophthora infestans</i> ) resistance in potato using resistance genes from South American potato relatives.                                            |
| 16. | <a href="#">B/GB/09/R31/01</a> | United Kingdom | 01/02/2010 | University of Leeds                                  | Control of potato cyst-nematodes with minimised environmental impact.                                                                                                                |
| 17. | <a href="#">B/SE/09/12598</a>  | Sweden         | 27/01/2010 | Syngenta Seeds AB                                    | SBVR111. Rhizomania resistant sugar beets, Sweden, 2010 – 2014.                                                                                                                      |
| 18. | <a href="#">B/ES/09/46</a>     | Spain          | 06/04/2009 | Syngenta Seeds SA                                    | Sugar beet tolerant to glyphosate and resistant to Rhizomania, Spain, 2009 – 2012.                                                                                                   |
| 19. | <a href="#">B/ES/09/27</a>     | Spain          | 03/04/2009 | Dow AgroSciences                                     | Efficacy trials on <i>Agrotis ypsilon/segetum</i> with 1507 maize varieties.                                                                                                         |
| 20. | <a href="#">B/CZ/09/02</a>     | Czech Republic | 18/02/2009 | Vesa Velhartice                                      | Release into the environment of genetically modified potatoes with the change of late blight resistance.                                                                             |
| 21. | <a href="#">B/DE/07/195</a>    | Germany        | 23/06/2008 | University of Rostock                                | In-field evaluation of loose smut resistance in genetically modified spring wheat expressing KP4 protein with special focus on effects of resistance against other fungal pathogens. |
| 22. | <a href="#">B/SE/07/12880</a>  | Sweden         | 09/01/2008 | Syngenta Seeds AB                                    | Sugar beet tolerant to glyphosate and resistant to virus disease Rhizomania, Sweden, 2008 – 2012.                                                                                    |
| 23. | <a href="#">B/NL/07/07</a>     | Netherlands    | 05/12/2007 | BASF Plant Science GmbH                              | Potato with improved resistance to <i>Phytophthora infestans</i> .                                                                                                                   |
| 24. | <a href="#">B/NL/07/01</a>     | Netherlands    | 05/12/2007 | Wageningen University                                | Testing of genetic modified potato plants for late blight resistance.                                                                                                                |

|     |                                  |                |            |                         |                                                                                                                                                                                                                     |
|-----|----------------------------------|----------------|------------|-------------------------|---------------------------------------------------------------------------------------------------------------------------------------------------------------------------------------------------------------------|
| 25. | <a href="#">B/DE/07/191</a>      | Germany        | 05/12/2007 | BASF Plant Science GmbH | Application for the release into environment of genetically modified potatoes with altered starch metabolism or with improved resistance to <i>Phytophthora infestans</i> under simplified procedure (2008 – 2012). |
| 26. | <a href="#">B/GB/07/R42/01</a>   | United Kingdom | 23/03/2007 | BASF Plant Science GmbH | Notification for the release into the environment of genetically modified potatoes with improved resistance to <i>Phytophthora infestans</i> (2007 – 2011).                                                         |
| 27. | <a href="#">B/DE/06/183</a>      | Germany        | 16/02/2007 | BASF Plant Science GmbH | Application for the release into environment of genetically modified potatoes with altered starch metabolism or with improved resistance to <i>Phytophthora infestans</i> (2007 – 2011).                            |
| 28. | <a href="#">B/CZ/07/01</a>       | Czech Republic | 29/01/2007 | BASF CZ                 | Release into the environment of genetically modified potatoes with improved resistance to <i>Phytophthora infestans</i> .                                                                                           |
| 29. | <a href="#">B/DE/05/174</a>      | Germany        | 07/03/2006 | BASF Plant Science GmbH | Application for the release into the environment of genetically modified potatoes with improved resistance to <i>Phytophthora infestans</i> (2006 – 2010).                                                          |
| 30. | <a href="#">B/IE/06/01</a>       | Ireland        | 14/02/2006 | BASF Plant Science GmbH | Notification for the release into the environment of genetically modified potatoes with improved resistance to <i>Phytophthora infestans</i> (2006 – 2010).                                                         |
| 31. | <a href="#">B/SE/05/8615</a>     | Sweden         | 16/11/2005 | Plant Science Sweden AB | Potato with improved resistance to <i>Phytophthora infestans</i> .                                                                                                                                                  |
| 32. | <a href="#">B/NL/05/03</a>       | Netherlands    | 17/10/2005 | BASF Plant Science GmbH | Potato with improved resistance to <i>Phytophthora infestans</i> .                                                                                                                                                  |
| 33. | <a href="#">B/SE/05/450</a>      | Sweden         | 20/01/2005 | Plant Science Sweden AB | Potato with improved resistance to <i>Phytophthora</i> .                                                                                                                                                            |
| 34. | <a href="#">B/SE/03/6371-CON</a> | Sweden         | 13/01/2004 | Syngenta Seeds AB       | Rhizomania resistant sugar beet. Sweden 2004 – 2008.                                                                                                                                                                |
| 35. | <a href="#">B/DE/02/143</a>      | Germany        | 19/05/2003 | Syngenta Seeds GmbH     | Fungal resistant wheat. Germany 2003, Fusarium pathogens.                                                                                                                                                           |
| 36. | <a href="#">B/FR/03/01/02</a>    | France         | 03/03/2003 | ADVANTA France          | Validation of a concept of long-term resistance to the rhizomania virus (BNYVV): Field evaluation of sugar beet hybrids genetically modified to be resistant to BNYVV (experimental programme: 2003 – 2006).        |
| 37. | <a href="#">B/FR/03/01/03</a>    | France         | 03/03/2003 | Syngenta Seeds SA       | Rhizomania resistant sugar beet. France 2003-2007.                                                                                                                                                                  |
| 38. | <a href="#">B/FR/03/01/05</a>    | France         | 03/03/2003 | Pioneer Genetique       | Testing of Coleopteran insect resistant as well as herbicide tolerant maize hybrids                                                                                                                                 |
| 39. | <a href="#">B/FR/03/02/02</a>    | France         | 03/03/2003 | Pioneer Genetique Sarl  | Testing of insect resistant and herbicides tolerant maize hybrids.                                                                                                                                                  |



|     |                      |                |            |                    |                                                                                                                                                                                                                                 |
|-----|----------------------|----------------|------------|--------------------|---------------------------------------------------------------------------------------------------------------------------------------------------------------------------------------------------------------------------------|
| 40. | <u>B/FR/03/02/03</u> | France         | 03/03/2003 | Biogemma           | Field experimentation of a genetically modified corn tolerant to corn root worm                                                                                                                                                 |
| 41. | <u>B/GB/02/R34/4</u> | United Kingdom | 16/01/2003 | Syngenta Seeds Ltd | To compare the pathogen infestation level and mycotoxin level of wheat modified to express an enhanced resistance to <i>Fusarium</i> pathogens with existing non-modified varieties, grown under standard agronomic conditions. |

\* A participative experiment (using an obsolete virus resistance technology) designed by sociologists, involving stakeholders, which was nevertheless vandalized twice (see Kuntz et al. 2012).
