# Supplementary material
Source: publisher figshare collection journal article supplement (https://tandf.figshare.com/articles/dataset/_/1568579)
Supplement: Supplementary file 2 [file 2]

## Supplementary Material 8.

### Analysis of patents dealing with Biotic Stress (BS) challenges according to pests/diseases and crop

- The country codes in bold case correspond to the country of the applicants.
- Extensions of non-European patents to Europe are highlighted in blue in the European patent column. These extensions are not counted individually in the total patent number (350).
- Patents concerning several pests or crops are counted several times.

| CROP  | BS CHALLENGE         | LATIN NAMES                                                                                                                                                 | PATENT NUMBER | EUROPEAN PATENTS                                                                                                                         | NON EUROPEAN PATENTS                                                                     |
|-------|----------------------|-------------------------------------------------------------------------------------------------------------------------------------------------------------|---------------|------------------------------------------------------------------------------------------------------------------------------------------|------------------------------------------------------------------------------------------|
|       |                      |                                                                                                                                                             |               | <i>Inventions (methods or genes)</i>                                                                                                     | <i>Patented varieties</i>                                                                |
| WHEAT | Fungal diseases      |                                                                                                                                                             |               |                                                                                                                                          |                                                                                          |
|       | Septoria leaf blotch | <i>Mycosphaerella graminicola</i><br>(anamorph: <i>Septoria tritici</i> )                                                                                   | 1             |                                                                                                                                          | RO 1999<br>(Before its entry in EU)                                                      |
|       | Rusts                | <i>Puccinia triticina</i> (Wheat leaf rust = brown rust)<br><i>Puccinia graminis</i> (Stem rust)<br><i>Puccinia striiformis</i> (Stripe rust = yellow rust) | 44            | CN 2000, 2002, 2004, 2008(2), 2009(2), 2010(8), 2011(4), 2012(4), 2013(3), 2014(4)<br>RU 1995(2), 1998, 2010<br>US 2013, 2014<br>IN 2005 | CN 2008, 2013, 2014(2)<br>RO 1999(2)<br>(Before its entry in EU)                         |
|       | Powdery mildew       | <i>Blumeria (Erysiphe) graminis</i>                                                                                                                         | 68            | CN 2003, 2004(2), 2005, 2006(5), 2008, 2009(4), 2010(19), 2011(7), 2012(10), 2013(7), 2014(6)<br>BG 1995<br>(Before its entry in EU)     | RU 2000<br>RO 1999(2)<br>(Before its entry in EU)<br>SK 1994<br>(Before its entry in EU) |
|       | Bunts and smuts      | <i>Ustilago tritici</i> ,<br><i>Tilletia caries</i> , <i>T. leavis</i> ,<br><i>T. controversa</i>                                                           | 1             |                                                                                                                                          | CN 2012                                                                                  |

|                                      |                                                                                                         |                    |                    |                                                                                                                        |                                           |
|--------------------------------------|---------------------------------------------------------------------------------------------------------|--------------------|--------------------|------------------------------------------------------------------------------------------------------------------------|-------------------------------------------|
| Fusarioses<br>(incl. Head<br>blight) | <i>Fusarium graminearum</i> , <i>F. culmorum</i> , <i>F. avenaceum</i> ,<br><i>Microdochium</i> spp.    | 19                 | FR 2003<br>EP 2012 | CN 2003, 2009, 2010(2), 2011,<br>2012, 2013(2)<br>US 2001, 2002, 2005, 2011,<br>2013, 2014<br>MD 2001, 2007 (Moldavia) | RO 1999(2)<br>(Before its entry in<br>EU) |
| Take-all                             | <i>Gaeumannomyces graminis</i>                                                                          | 1                  |                    | CN 2013                                                                                                                |                                           |
| Tan spot,<br>yellow leaf spot        | <i>Drechslera tritici</i> , <i>Pyrenophora tritici</i><br><i>repentis</i> , <i>Stagonospora nodorum</i> | 1                  |                    | MD 2007                                                                                                                |                                           |
| Insect pests                         |                                                                                                         |                    |                    |                                                                                                                        |                                           |
| Sunn pest                            | <i>Eurygaster integriceps</i>                                                                           | 1                  |                    | RU 2005                                                                                                                |                                           |
| Grain aphid,<br>Rose-grain aphid     | <i>Sitobion avenae</i> ,<br><i>Metopolophium dirhodum</i>                                               | 4                  |                    | CN 2003, 2006, 2009, 2011                                                                                              |                                           |
| Viral disease                        |                                                                                                         | 6                  | EP 2012            | CN 2002, 2004, 2008, 2011, 2013<br>US 2011                                                                             |                                           |
| Subtotal 146                         |                                                                                                         | 3 European patents |                    |                                                                                                                        |                                           |
| BARLEY                               | Fungal diseases                                                                                         |                    |                    |                                                                                                                        |                                           |
| Barley rust,<br>stem rust            | <i>Puccinia hordei</i> ,<br><i>P. graminis</i>                                                          | 1                  | EP 2000            | AU+US 1999                                                                                                             |                                           |
| Bunts and smuts                      | <i>Ustilago tritici</i> ,<br><i>Tilletia caries</i> , <i>T. leavis</i> ,<br><i>T. controversa</i>       | 1                  |                    |                                                                                                                        | RO 1999<br>(Before its entry in<br>EU)    |
| Fusarioses<br>(incl. Head<br>blight) | <i>Fusarium graminearum</i> ,<br><i>F. culmorum</i>                                                     | 3                  | EP 2008            | US 2002<br>JP 2004, 2007                                                                                               |                                           |
| Powdery mildew                       | <i>Blumeria (Erysiphe) graminis</i>                                                                     | 4                  |                    | CN 2012(2), 2014<br>UA 2006                                                                                            |                                           |
| Viral diseases                       |                                                                                                         | 2                  | EP 2008            | JP 2005<br>AU 2002                                                                                                     |                                           |
| Subtotal 11                          |                                                                                                         | 3 European patents |                    |                                                                                                                        |                                           |

| MAIZE                |                                                                        | Fungal diseases     |                                                                                                                   |                                                                                |                                                               |  |
|----------------------|------------------------------------------------------------------------|---------------------|-------------------------------------------------------------------------------------------------------------------|--------------------------------------------------------------------------------|---------------------------------------------------------------|--|
| Common smut          | <i>Ustilago zeae</i> = <i>U. maydis</i>                                | 12                  | EP 2011                                                                                                           | CN 1995(2), 2009, 2010(4), 2011, 2012<br>CN+US 2010                            | RO 1998(2)<br>(Before its entry in EU)                        |  |
| Fusarioses           | <i>Fusarium</i> spp., <i>F. graminearum</i> , <i>F. verticilloides</i> | 16                  | FR 2008, 2009<br>CH 2008, 2013<br>EP 2000, EP 2012(2)                                                             | CA 1999, 2002,<br>US 2010 (2), 2011<br>UA 2010                                 | RO 1998(6)<br>(Before its entry in EU)                        |  |
| Northern leaf blight | <i>Exserohilum</i> (= <i>Helminthosporium</i> ) <i>turcicum</i>        | 11                  | EP 2000, EP 2008, EP 2010, EP 2011, EP 2013                                                                       | US 1999, 2006, 2008, 2010, 2011<br>CN 2010                                     | US 1999, 2003<br>RO 1997, 1998(2)<br>(Before its entry in EU) |  |
| Insect pests         |                                                                        |                     |                                                                                                                   |                                                                                |                                                               |  |
| General patents      |                                                                        | 4                   | EP 2008                                                                                                           | US 1998, 2008<br>CN 2011, 2014                                                 |                                                               |  |
| European corn borer  | <i>Ostrinia nubilalis</i>                                              | 17                  | NL 1998<br>EP 2010, EP 2013, EP 2014                                                                              | US 2004, 2009, 2011(2), 2013<br>CN 2006(2), 2008, 2011, 2012(2)                | RO 1997, 1998(4)<br>(Before its entry in EU)                  |  |
| Corn rootworm        | <i>Diabrotica</i> spp.                                                 | 23                  | DE 2008(2), 2010<br>CH 2003<br>EP 1996, EP 1998, EP 2000, EP 2001, EP 2002, EP 2007, EP 2008, EP 2010(2), EP 2013 | US 1994, 1996, 1998, 2000(4), 2004, 2007, 2009(2), 2011(2), 2014(3)<br>CN 2009 | US 1996<br>CH 2003                                            |  |
| Wireworms            | <i>Agriotes</i> spp., <i>A. lineatus</i>                               | 1                   | NL 1998                                                                                                           |                                                                                |                                                               |  |
| Cotton bollworm      | <i>Helicoverpa armigera</i> = <i>Heliothis armigera</i>                | 2                   | EP 2013                                                                                                           | US 2012<br>CN 2010                                                             |                                                               |  |
| Subtotal 86          |                                                                        | 34 European patents |                                                                                                                   |                                                                                |                                                               |  |

|                           |                             |                                                                                                                             |                           |                    |                               |
|---------------------------|-----------------------------|-----------------------------------------------------------------------------------------------------------------------------|---------------------------|--------------------|-------------------------------|
| OILSEED RAPE/<br>BRASSICA | <b>Fungal diseases</b>      |                                                                                                                             |                           |                    |                               |
|                           | Sclerotinia<br>(White mold) | <i>Sclerotinia sclerotiorum</i>                                                                                             | 3                         | EP 2008            | US 2006, 2012<br>CN 2014      |
|                           | Black leg                   | <i>Leptosphaeria maculans</i><br>(anamorph: <i>Phoma lingam</i> )                                                           | 4                         | BE 2005            | US 2000(2), 2008              |
|                           | Clubroot                    | <i>Plasmodiophora brassicae</i>                                                                                             | 6                         | NL 2012<br>EP 2014 | JP 2009<br>US 2013<br>KR 2010 |
|                           | Ring spot                   | <i>Mycosphaerella brassicicola</i>                                                                                          | 2                         | NL 2002, 2007      |                               |
|                           | Verticillium wilt           | <i>Verticillium longisporum</i>                                                                                             | 2                         | EP 2002            | CA 2000<br>CN 2011            |
|                           | Mildew                      | Powdery mildew ( <i>Erysiphe cruciferarum</i> ) ; Downy mildew ( <i>Hyaloperonospora parasitica</i> , <i>H. brassicae</i> ) | 2                         | GB 2000            | KR 2012                       |
|                           | <b>Insect pests</b>         |                                                                                                                             |                           |                    |                               |
|                           | Flea beetle                 | <i>Phyllotreta</i> spp.                                                                                                     | 1                         |                    | CN 2014                       |
| <b>Subtotal 20</b>        |                             |                                                                                                                             | <b>8 European patents</b> |                    |                               |

|             |                     |                                                      |                    |                  |                          |                                                                                  |
|-------------|---------------------|------------------------------------------------------|--------------------|------------------|--------------------------|----------------------------------------------------------------------------------|
| SUNFLOWER   | General patent      |                                                      | 1                  | EP 2000          | US 1999                  |                                                                                  |
|             | Fungal diseases     |                                                      |                    |                  |                          |                                                                                  |
|             | Downy mildew        | <i>Plasmopara halstedii</i> ,<br><i>P. helianthi</i> | 2                  |                  |                          | HU 1995(2)<br>(Before its entry in EU)                                           |
|             | Sclerotinia         | <i>Sclerotinia sclerotiorum</i>                      | 6                  | FR 1998, 2005    |                          | HU 1995(2)<br>(Before its entry in EU)<br>RO 1998(2)<br>(Before its entry in EU) |
|             | Botrytis bunch rot  | <i>Botrytis cinerea</i>                              | 1                  |                  |                          | HU 1995<br>(Before its entry in EU)                                              |
|             | Phomopsis           | <i>Diaporthe helianthi</i>                           | 4                  |                  | UA 2011                  | HU 1995(2)<br>(Before its entry in EU)<br>RO 1998<br>(Before its entry in EU)    |
|             | Parasitic plant     |                                                      |                    |                  |                          |                                                                                  |
|             | Sunflower broomrape | <i>Orobanche cumana</i>                              | 4                  | EP 2005, EP 2009 | UA 2011<br>US 2003, 2008 | RO 1998<br>(Before its entry in EU)                                              |
| Subtotal 18 |                     |                                                      | 5 European patents |                  |                          |                                                                                  |

|                    |                                            |                                                                                                                                |                           |                           |                                                    |
|--------------------|--------------------------------------------|--------------------------------------------------------------------------------------------------------------------------------|---------------------------|---------------------------|----------------------------------------------------|
| <b>GRAPEVINE</b>   | <b>Fungal diseases</b>                     |                                                                                                                                |                           |                           |                                                    |
|                    | Mildew                                     | Downy mildew ( <i>Plasmopara viticola</i> )<br>Powdery mildew ( <i>Erysiphe necator</i> = <i>Uncinula necator</i> )            | 7                         |                           | CN 2005(2), 2008, 2009, 2011<br>JP 2000<br>US 2012 |
|                    | Gray mold = grey mould, Botrytis bunch rot | <i>Botryotinia fuckeliana</i> (anamorph: <i>Botryotinia cinerea</i> )                                                          | 2                         | EP 1999                   | US 1997, 2003                                      |
|                    | Grape tortrix, Argyrotaenia = Eulia        | <i>Argyrotaenia ljugiana</i> = <i>A. pulchellana</i> – <i>Eulia pulchellana</i> = <i>E. politana</i> = <i>Tortrix politana</i> |                           |                           |                                                    |
|                    | <b>Insects pests</b>                       |                                                                                                                                |                           |                           |                                                    |
|                    | <b>Virus-like disease</b>                  |                                                                                                                                |                           |                           |                                                    |
|                    | Flavescence dorée, bois noir (Black wood)  |                                                                                                                                | 1                         | DE 2010                   |                                                    |
|                    | <b>Viral diseases</b>                      |                                                                                                                                |                           |                           |                                                    |
|                    | Grapevine fanleaf virus                    |                                                                                                                                | 4                         | CZ 2011, EP 2000, EP 2009 | CL 2013, US 1999, US 1999                          |
|                    | Grapevine leafroll-associated virus        |                                                                                                                                | 4                         | EP 2000, EP 2001          | US 1998, 1999, 2001, 2013                          |
| <b>Subtotal 18</b> |                                            |                                                                                                                                | <b>7 European patents</b> |                           |                                                    |

|                    |                                                                                           |                                                                                                                                                                                                       |                            |                                                                                    |                                                |                                              |
|--------------------|-------------------------------------------------------------------------------------------|-------------------------------------------------------------------------------------------------------------------------------------------------------------------------------------------------------|----------------------------|------------------------------------------------------------------------------------|------------------------------------------------|----------------------------------------------|
| <b>POTATO</b>      | <b>Fungal diseases</b>                                                                    |                                                                                                                                                                                                       |                            |                                                                                    |                                                |                                              |
|                    | Late blight                                                                               | <i>Phytophthora infestans</i>                                                                                                                                                                         | <b>16</b>                  | NL 2002, 2003, 2007, 2008(2)<br>DE 2001, 2012, 2014<br>CH 2006<br>EP 1999, EP 2000 | AR 2014, JP 1999, CN 2008, KR 2008(2), US 1999 | RU 2013                                      |
|                    | Early blight                                                                              | <i>Alternaria solani</i>                                                                                                                                                                              | <b>3</b>                   |                                                                                    | RU 2014, JP 2010                               | RO 1999<br>(Before its entry in EU)          |
|                    | <b>Insect pests</b>                                                                       |                                                                                                                                                                                                       |                            |                                                                                    |                                                |                                              |
|                    | Potato aphid                                                                              | <i>Macrosiphum euphorbiae</i> , <i>M. solani</i> , <i>Siphonophora</i>                                                                                                                                | <b>6</b>                   | NL 1998<br>EP 2001, EP 2002                                                        | US 2000(3)<br>RU 2006, 2008                    |                                              |
|                    | Potato beetle, Colorado beetle, Ten-striped spearman, Ten-lined potato beetle, Potato bug | <i>solanifolii</i> , <i>Mysus persicae</i><br><i>Leptinotarsa decemlineata</i> , <i>Chrysomela decemlineata</i> , <i>Doryphora decemlineata</i> , <i>Polygramma decemlineata</i><br><i>Diabrotica</i> |                            |                                                                                    |                                                |                                              |
|                    | <b>Nematode pest</b>                                                                      |                                                                                                                                                                                                       |                            |                                                                                    |                                                |                                              |
|                    | Golden nematode                                                                           | <i>Globodera rostochiensis</i> , <i>G. pallida</i>                                                                                                                                                    | <b>12</b>                  | NL 1998, 2000<br>DE 2001<br>FR 2011                                                | JP 2004, 2007<br>RU 2013, US 2013              | RO 1997(4)<br>(Before its entry in EU)       |
|                    | <b>Viral diseases</b>                                                                     |                                                                                                                                                                                                       |                            |                                                                                    |                                                |                                              |
|                    | Potato virus Y (PVY), Potato leafroll virus                                               |                                                                                                                                                                                                       | <b>5</b>                   | FR 2000<br>EE 2009                                                                 |                                                | RO 1997(2), 1999<br>(Before its entry in EU) |
| <b>Subtotal 42</b> |                                                                                           |                                                                                                                                                                                                       | <b>20 European patents</b> |                                                                                    |                                                |                                              |

|            |                                                                                             |                                                   |                    |                                          |
|------------|---------------------------------------------------------------------------------------------|---------------------------------------------------|--------------------|------------------------------------------|
| BEET       | Fungal diseases                                                                             |                                                   |                    |                                          |
|            | Powdery mildew                                                                              | <i>Erysiphe polygoni, E. betae</i>                | 1                  | US 2013                                  |
|            | Insect pests                                                                                |                                                   |                    |                                          |
|            | Flea beetle, beet flea                                                                      | <i>Chaetocnema tibialis</i>                       | 1                  | RU 2008                                  |
|            | Viral diseases                                                                              |                                                   |                    |                                          |
|            | Beet western yellow virus,<br>Beet mild yellowing virus,<br>Beet necrotic yellow vein virus |                                                   | 5                  | EP 1998<br>FR 2000<br>NL 2000<br>EP 2000 |
| Subtotal 7 |                                                                                             |                                                   | 4 European patents |                                          |
| OLIVE      | Bacterial diseases                                                                          |                                                   |                    |                                          |
|            | Olive-knot disease                                                                          | <i>Pseudomonas syringae</i> pv. <i>savastanoi</i> | 2                  | US 1998, 2006                            |
| Subtotal 2 |                                                                                             |                                                   | 0 European patent  |                                          |
| TOTAL      |                                                                                             |                                                   | 350                | 84                                       |
